# Supplementary material for: What Is Citizen Science? – A Scientometric Meta-Analysis
Source: PLoS One. 2016 Jan 14;11(1):e0147152. doi: 10.1371/journal.pone.0147152 (PMC4713078; doi:10.1371/journal.pone.0147152)
Supplement: S1 Appendix — (XLSX) [file pone.0147152.s001.xlsx]

## Sheet: Index
Appendix 1
Contents:
1	Source Dataset N=1935, retrieved from the Web of Science Core Collection 2015-12-17
2	Source Dataset Search String
3	Initial Search String, used 2015-10-13 to create the first set of keywords for the recursive searches
4	Keywords. Matrix used for recursive searches
5	Recursive Search 1: Search String
6	Recursive Search Source Data: 1
7	Recursive Search 2: Search String
8	Recursive Search Source Data: 2
9	Recursive Search 3: Search String
10	Recursive Search Source Data: 3
11	Bibliography, Alphabetical of Source Dataset (N=1935)

## Sheet: 1. N=1935 Source Data
PT	AU	BA	BE	GP	AF	BF	CA	TI	SO	SE	BS	LA	DT	CT	CY	CL	SP	HO	DE	ID	AB	C1	RP	EM	RI	OI	FU	FX	CR	NR	TC	Z9	U1	U2	PU	PI	PA	SN	EI	BN	J9	JI	PD	PY	VL	IS	PN	SU	SI
J	Belbin, L; Williams, KJ				Belbin, Lee; Williams, Kristen J.			Towards a national bio-environmental data facility: experiences from the Atlas of Living Australia	INTERNATIONAL JOURNAL OF GEOGRAPHICAL INFORMATION SCIENCE			English	Article						Atlas of Living Australia; biological data; environmental data; spatial data infrastructure; information management; knowledge integration; biodiversity; GIS	BIODIVERSITY DATABASES; DISTRIBUTIONS; ASSIGNMENT; LIFE	The Atlas of Living Australia (ALA: http://www.ala.org.au) provides the largest free and open repository of integrated biological and environmental information in a consistent format for the Australian region. As of June 2015, the ALA contained over 55 million records (10% of Global Biodiversity Information Facility's (GBIF's) total), consisting of 150,000+ native and alien species, nearly 500 la…	[Belbin, Lee] Atlas Living Australia, Canberra, ACT, Australia; [Williams, Kristen J.] CSIRO Land & Water, Biodivers Ecosyst Knowledge & Serv Program, Canberra, ACT, Australia	Belbin, L (reprint author), Atlas Living Australia, Canberra, ACT, Australia.	leebelbin@gmail.com			Commonwealth Scientific and Industrial Research Organisation (CSIRO); Atlas of Living Australia (ALA)	This work was supported by the Commonwealth Scientific and Industrial Research Organisation (CSIRO) and the Atlas of Living Australia (ALA).	ABARES, 2010, AUSTR LAND US MAN AL; ALA, 2015, WEB SERV API REQ US; ALA, 2011, ALA RESP 2011 STRAT; ALA, 2014, SPAT PORT HELP TAB; Belbin L, 2013, ZOOKEYS, P67, DOI 10.3897/zookeys.305.5438; Whetton P, 2012, CLIMATIC CHANGE, V115, P433, DOI 10.1007/s10584-012-0471-z; BELBIN L, 1983, AUST COMPUT J, V15, P160; Ferrier S, 2007, DIVERS DISTRIB, V13, P252, DOI 10.1111/j.1472-4642.2007.00341.x; Xu TB, …	78	0	0	27	27	TAYLOR & FRANCIS LTD	ABINGDON	4 PARK SQUARE, MILTON PARK, ABINGDON OX14 4RN, OXON, ENGLAND	1365-8816	1362-3087		INT J GEOGR INF SCI	Int. J. Geogr. Inf. Sci.	2015-01-02	2016	30	1			SI
J	Targetti, S; Herzog, F; Geijzendorffer, IR; Pointereau, P; Viaggi, D				Targetti, S.; Herzog, F.; Geijzendorffer, I. R.; Pointereau, P.; Viaggi, D.			Relating costs to the user value of farmland biodiversity measurements	JOURNAL OF ENVIRONMENTAL MANAGEMENT			English	Article						Agriculture; Farmer; Volunteer; Citizen science; Biodiversity indicators; Multi-criteria evaluation; Stakeholders	MULTICRITERIA DECISION-MAKING; NATURAL-RESOURCE MANAGEMENT; ANALYTIC HIERARCHY PROCESS; ECOSYSTEM SERVICES; CITIZEN SCIENCE; STAKEHOLDER PARTICIPATION; AGRICULTURAL LANDSCAPES; INDICATORS; POLICY; CONSERVATION	The impact of agricultural management on global biodiversity highlights the need for farm-scale monitoring programmes capable of determining the performance of agriculture practices. Yet the identification of appropriate indicators is a challenging process and one that involves considering a number of different aspects and requirements. Besides the attention given to scientific effectiveness, rel…	[Targetti, S.] Aix Marseille Univ, Inst Adv Studies, F-13004 Marseille, France; [Targetti, S.; Viaggi, D.] Univ Bologna, Dept Agr Sci, I-40127 Bologna, Italy; [Herzog, F.] Inst Sustainabil Sci, Agroscope, CH-8046 Zurich, Switzerland; [Geijzendorffer, I. R.] Avignon Univ, Inst Mediterraneen Biodiversite & Ecol Marine & C, CNRS, IRD,Aix Marseille Univ, F-13545 Aix En Provence 04, France; [Pointerea…	Targetti, S (reprint author), Aix Marseille Univ, Inst Adv Studies, F-13004 Marseille, France.	targettis@gmail.com			EU [KBBE 227161]; Labex OT-Med; EU BON (EU) [308454]	Part of this research was granted by the EU-FP7 Project BioBio "Indicators for biodiversity in organic and low-input farming systems", contract No KBBE 227161. www.biobio-indicator.org. ST acknowledges support from Labex OT-Med www.otmed.fr. The contribution of IRG was financed by the EU BON project (www.eubon.eu, EU FP 7, Grant no. 308454). This work does not necessarily reflect the view of the …	Rempel RS, 2004, FOREST CHRON, V80, P82; Gardner TA, 2008, ECOL LETT, V11, P139, DOI 10.1111/j.1461-0248.2007.01133.x; MILLER GA, 1956, PSYCHOL REV, V63, P81, DOI 10.1037//0033-295X.101.2.343; Cong RG, 2014, ECOL ECON, V99, P53, DOI 10.1016/j.ecolecon.2014.01.007; Pe'er G, 2014, SCIENCE, V344, P1090, DOI 10.1126/science.1253425; Chess C, 2005, J RISK RES, V8, P63, DOI 10.1080/1366987042000275109;…	91	0	0	18	18	ACADEMIC PRESS LTD- ELSEVIER SCIENCE LTD	LONDON	24-28 OVAL RD, LONDON NW1 7DX, ENGLAND	0301-4797	1095-8630		J ENVIRON MANAGE	J. Environ. Manage.	2015-01-01	2016	165
J	Huang, H				Huang, Hai			Anomalous behavior detection in single-trajectory data	INTERNATIONAL JOURNAL OF GEOGRAPHICAL INFORMATION SCIENCE			English	Article						Trajectory; GPS; Anomalous pattern; Markov chain; Recursive Bayesian estimation	PATTERNS; FILTER	This paper presents an original approach to dynamic anomalous behavior detection in individual trajectory using a recursive Bayesian filter. The anomalous pattern detection is of great interest for navigation, driver assistance systems, surveillance as well as crisis management. In this work, we focus on the GPS trajectories of automobiles finding where the driver's behavior shows anomalies. Such…	Bundeswehr Univ Munich, Inst Appl Comp Sci, Neubiberg, Germany	Huang, H (reprint author), Bundeswehr Univ Munich, Inst Appl Comp Sci, Neubiberg, Germany.	hai.huang@unibw.de					Ahmed M, 2014, CORR; Morris BT, 2008, IEEE T CIRC SYST VID, V18, P1114, DOI 10.1109/TCSVT.2008.927109; Hu WM, 2006, IEEE T PATTERN ANAL, V28, P1450; Pang LX, 2013, DATA KNOWL ENG, V87, P357, DOI 10.1016/j.datak.2013.05.002; Bu YY, 2009, KDD-09: 15TH ACM SIGKDD CONFERENCE ON KNOWLEDGE DISCOVERY AND DATA MINING, P159; Piciarelli C, 2008, IEEE T CIRC SYST VID, V18, P1544, DOI 10.1109/TCSVT.2008.2005…	22	0	0	25	25	TAYLOR & FRANCIS LTD	ABINGDON	4 PARK SQUARE, MILTON PARK, ABINGDON OX14 4RN, OXON, ENGLAND	1365-8816	1362-3087		INT J GEOGR INF SCI	Int. J. Geogr. Inf. Sci.	2015-12-02	2015	29	12
J	Ballatore, A; Mooney, P				Ballatore, Andrea; Mooney, Peter			Conceptualising the geographic world: the dimensions of negotiation in crowdsourced cartography	INTERNATIONAL JOURNAL OF GEOGRAPHICAL INFORMATION SCIENCE			English	Article						crowdsourced cartography; semantic negotiation; ontology engineering; volunteered geographic information; OpenStreetMap	OPENSTREETMAP; ONTOLOGY; TERMS; MAPS	In crowdsourced cartographic projects, mappers coordinate their efforts through online tools to produce digital geospatial artefacts, such as maps and gazetteers, which were once the exclusive territory of professional surveyors and cartographers. In order to produce meaningful and coherent data, contributors need to negotiate a shared conceptualisation that defines the domain concepts, such as r…	[Ballatore, Andrea] Univ Calif Santa Barbara, Ctr Spatial Studies, Santa Barbara, CA 93106 USA; [Mooney, Peter] Maynooth Univ, Dept Comp Sci, Maynooth, Ireland	Ballatore, A (reprint author), Univ Calif Santa Barbara, Ctr Spatial Studies, Santa Barbara, CA 93106 USA.	aballatore@spatial.ucsb.edu					Ballatore A, 2013, INT J GEOGR INF SCI, V27, P2099, DOI 10.1080/13658816.2013.790548; Perkins C, 2014, T I BRIT GEOGR, V39, P304, DOI 10.1111/tran.12022; Rorissa A, 2010, J AM SOC INF SCI TEC, V61, P2230, DOI 10.1002/asi.21401; Crampton JW, 2009, PROG HUM GEOG, V33, P91, DOI 10.1177/0309132508094074; Gerlach J, 2014, PROG HUM GEOG, V38, P22, DOI 10.1177/0309132513490594; Elwood S, 2012, ANN ASSOC…	33	0	0	21	21	TAYLOR & FRANCIS LTD	ABINGDON	4 PARK SQUARE, MILTON PARK, ABINGDON OX14 4RN, OXON, ENGLAND	1365-8816	1362-3087		INT J GEOGR INF SCI	Int. J. Geogr. Inf. Sci.	2015-12-02	2015	29	12
J	Robinson, CJ; Bark, RH; Garrick, D; Pollino, CA				Robinson, Catherine J.; Bark, Rosalind H.; Garrick, Dustin; Pollino, Carmel A.			Sustaining local values through river basin governance: community-based initiatives in Australia's Murray - Darling basin	JOURNAL OF ENVIRONMENTAL PLANNING AND MANAGEMENT			English	Article						values; local action; monitoring and evaluation; integrated water planning and management	MANAGEMENT; KNOWLEDGE; LESSONS; STATES; SCALE	Australia's Murray-Darling basin (MDB) water plan is an ambitious attempt to balance ecological, social and economic benefits, where a key aspect of the reform process has been recovery of water for environmental use. This paper focuses on a set of initiatives established by a local non-governmental organisation and an Indigenous community designed to engage with local values and priorities and i…	[Robinson, Catherine J.; Bark, Rosalind H.] CSIRO, Land & Water Flagship, Brisbane, Qld, Australia; [Robinson, Catherine J.] Univ Queensland, Sch Geog Planning & Environm Management, St Lucia, Qld, Australia; [Bark, Rosalind H.] Univ Leeds, CCCEP, Leeds LS2 9JT, W Yorkshire, England; [Garrick, Dustin] McMaster Univ, Dept Polit Sci, Hamilton, ON, Canada; [Garrick, Dustin] McMaster Univ, Walter G B…	Robinson, CJ (reprint author), CSIRO, Land & Water Flagship, Brisbane, Qld, Australia.	catherine.robinson@csiro.au	Robinson, Cathy/D-3349-2011; Pollino, Carmel/F-3508-2011; Bark, Rosalind/D-3278-2011	Bark, Rosalind/0000-0002-9876-9322	CSIRO Land and Water Flagship; Payne Scott award	This research was funded by the CSIRO Land and Water Flagship and Payne Scott award. The Yorta Yorta case study was part of an MDBA-commissioned report that examined the effects of changes in water availability on the Indigenous people of the Murray-Darling Basin. The authors would like to acknowledge the generosity of the participants in terms of the insights they offered and the time they spent…	Robinson CJ, 2011, SOC NATUR RESOUR, V24, P849, DOI 10.1080/08941920.2010.487848; Kroon FJ, 2009, MAR FRESHWATER RES, V60, P1183, DOI 10.1071/MF08349; de Groot RS, 2010, ECOL COMPLEX, V7, P260, DOI 10.1016/j.ecocom.2009.10.006; Cash DW, 2006, ECOL SOC, V11; Mueller-Hirth N, 2012, DEV CHANGE, V43, P649, DOI 10.1111/j.1467-7660.2012.01776.x; Loehman ET, 2011, WATER INT, V36, P873, DOI 10.1080/02508…	40	0	0	28	28	ROUTLEDGE JOURNALS, TAYLOR & FRANCIS LTD	ABINGDON	4 PARK SQUARE, MILTON PARK, ABINGDON OX14 4RN, OXFORDSHIRE, ENGLAND	0964-0568	1360-0559		J ENVIRON PLANN MAN	J. Environ. Plan. Manag.	2015-12-02	2015	58	12
J	Jepson, P; Ladle, RJ				Jepson, Paul; Ladle, Richard J.			Nature apps: Waiting for the revolution	AMBIO			English	Article						Mobile apps; Applications; Citizen science; Biodiversity; Biogeography; Digital conservation	CITIZEN SCIENCE; CONSERVATION; DAWN	Apps are small task-orientated programs with the potential to integrate the computational and sensing capacities of smartphones with the power of cloud computing, social networking, and crowdsourcing. They have the potential to transform how humans interact with nature, cause a step change in the quantity and resolution of biodiversity data, democratize access to environmental knowledge, and rein…	[Jepson, Paul] Univ Oxford, Sch Geog & Environm, Oxford, England; [Ladle, Richard J.] Univ Fed Alagoas, Inst Biol & Hlth Sci, Maceio, AL, Brazil	Jepson, P (reprint author), Univ Oxford, Sch Geog & Environm, Oxford, England.	paul.jepson@ouce.ox.ac.uk			CNPQ [311412/2011-4]	We thank Simon Abele for his help in designing, coding and executing the scrape and the editors of Ambio's Digital Conservation Special issue and three anonymous reviewers for their valuable comments which improved earlier drafts of this article. RJL is funded by CNPQ, grant number 311412/2011-4.	Koh LP, 2012, TROP CONSERV SCI, V5, P121; Walters CL, 2012, J APPL ECOL, V49, P1064, DOI 10.1111/j.1365-2664.2012.02182.x; Kelling S, 2015, AMBIO, V44, pS601, DOI 10.1007/s13280-015-0710-4; Lave R, 2015, ANN ASSOC AM GEOGR, V105, P244, DOI 10.1080/00045608.2014.988099; Joppa LN, 2015, AMBIO, V44, pS522, DOI 10.1007/s13280-015-0702-4; Chapron G, 2015, AMBIO, V44, pS550, DOI 10.1007/s13280-015-0706…	22	2	2	6	6	SPRINGER	DORDRECHT	VAN GODEWIJCKSTRAAT 30, 3311 GZ DORDRECHT, NETHERLANDS	0044-7447	1654-7209		AMBIO	Ambio	DEC	2015	44	8
J	Xiao, Y; Huang, QY; Wu, K				Xiao, Yu; Huang, Qunying; Wu, Kai			Understanding social media data for disaster management	NATURAL HAZARDS			English	Article						Social media; Disaster management; Digital divide; Hurricane Sandy	VOLUNTEERED GEOGRAPHIC INFORMATION	Social media data are increasingly being used in disaster management for information dissemination, establishment of situational awareness of the "big picture" of the disaster impact and emerged incidences over time, and public peer-to-peer backchannel communications. Before we can fully trust the situational awareness established from social media data, we need to ask whether there are biases in…	[Xiao, Yu; Wu, Kai] Texas A&M Univ, Dept Landscape Architecture & Urban Planning, Hazard Reduct & Recovery Ctr, College Stn, TX 77843 USA; [Huang, Qunying] Univ Wisconsin, Dept Geog, Madison, WI 53706 USA	Xiao, Y (reprint author), Texas A&M Univ, Dept Landscape Architecture & Urban Planning, Hazard Reduct & Recovery Ctr, 3137 TAMU, College Stn, TX 77843 USA.	yuxiao@tamu.edu; qhuang46@wisc.edu; hardy011@tamu.edu					Ames M, 2007, SIGCHI C HUM FACT CO; [Anonymous], 2013, DALLAS MORNING NEWS; Gao H, 2011, IEEE INTELL SYST, V26, P10; [Anonymous], 2015, ISPRS INT GEO INF, DOI DOI 10.3390/IJGI4031549; Austin L, 2012, J APPL COMMUN RES, V40, P188, DOI 10.1080/00909882.2012.654498; De Longueville B, 2010, INT J DIGIT EARTH, V3, P242, DOI 10.1080/17538947.2010.484869; Goodchild MF, 2010, INT J DIGIT EARTH, V3, P231,…	33	1	1	0	0	SPRINGER	NEW YORK	233 SPRING ST, NEW YORK, NY 10013 USA	0921-030X	1573-0840		NAT HAZARDS	Nat. Hazards	DEC	2015	79	3
J	Plummer, KE; Siriwardena, GM; Conway, GJ; Risely, K; Toms, MP				Plummer, Kate E.; Siriwardena, Gavin M.; Conway, Greg J.; Risely, Kate; Toms, Mike P.			Is supplementary feeding in gardens a driver of evolutionary change in a migratory bird species?	GLOBAL CHANGE BIOLOGY			English	Article						blackcap; citizen science; climate change; contemporary evolution; human activities; migration; urban; winter distribution	WILD BIRDS; CLIMATE-CHANGE; POPULATIONS; BLACKCAPS; FOOD; MICROEVOLUTION; URBANIZATION; BEHAVIOR; ECOLOGY; BRITAIN	Human activities are causing rapid environmental change at a global scale. Urbanization is responsible for some of the most extreme human-altered habitats and is a known driver of evolutionary change, but evidence and understanding of these processes is limited. Here, we investigate the potential underlying mechanisms contributing to the contemporary evolution of migration behaviour in the Eurasi…	[Plummer, Kate E.; Siriwardena, Gavin M.; Conway, Greg J.; Risely, Kate; Toms, Mike P.] British Trust Ornithol, Thetford IP24 2PU, Norfolk, England	Plummer, KE (reprint author), British Trust Ornithol, Thetford IP24 2PU, Norfolk, England.	kate.plummer@bto.org			British Trust for Ornithology; Joint Nature Conservation Committee; National Parks and Wildlife Service (Ireland); BTO Young Scientist Appeal; Garden BirdWatch participants	We are very grateful to the community of BTO Garden BirdWatch participants who collect the data and support the project financially through their annual subscription and to the Garden BirdWatch administrative team who look after the surveys. We thank Kristian Metcalfe for constructive comments that greatly improved the manuscript, and two anonymous reviewers for their valuable insights. We also t…	Nakagawa S, 2013, METHODS ECOL EVOL, V4, P133, DOI 10.1111/j.2041-210x.2012.00261.x; Orros ME, 2015, IBIS, V157, P230, DOI 10.1111/ibi.12237; Satterfield DA, 2015, P ROY SOC B-BIOL SCI, V282, DOI 10.1098/rspb.2014.1734; LEACH IH, 1981, BIRD STUDY, V28, P5; BERTHOLD P, 1992, NATURE, V360, P668, DOI 10.1038/360668a0; Moller AP, 2014, OECOLOGIA, V175, P1019, DOI 10.1007/s00442-014-2953-3; Palkovacs …	57	0	0	14	14	WILEY-BLACKWELL	HOBOKEN	111 RIVER ST, HOBOKEN 07030-5774, NJ USA	1354-1013	1365-2486		GLOBAL CHANGE BIOL	Glob. Change Biol.	DEC	2015	21	12
J	Curtis, V				Curtis, Vickie			Motivation to Participate in an Online Citizen Science Game: A Study of Foldit	SCIENCE COMMUNICATION			English	Article						online citizen science; motivation; computer games; Foldit	VOLUNTEERS; PLAYERS; ENGAGEMENT; PROJECTS	Online citizen science projects have the potential to engage thousands of participants with scientific research. A small number of projects such as Foldit use an online computer game format. Motivation to participate in Foldit was investigated in a group of 37 players using an online survey, semistructured interviews, and participant observation. Results suggest that contributing to scientific re…	[Curtis, Vickie] Univ Glasgow, Wellcome Trust Ctr Mol Parasitol, Glasgow, Lanark, Scotland	Curtis, V (reprint author), Wellcome Trust Ctr Mol Parasitol, Sir Graeme Davis Bldg,120 Univ Pl, Glasgow G12 8TA, Lanark, Scotland.	Vickie.curtis@glasgow.ac.uk					Andersen E., 2012, P 2012 ACM C HUM FAC; Khatib F, 2011, NAT STRUCT MOL BIOL, V18, P1175, DOI 10.1038/nsmb.2119; Cardamone C, 2009, MON NOT R ASTRON SOC, V399, P1191, DOI 10.1111/j.1365-2966.2009.15383.x; Batson CD, 2002, J SOC ISSUES, V58, P429, DOI 10.1111/1540-4560.00269; Bohannon J, 2005, SCIENCE, V308, P810, DOI 10.1126/science.308.5723.810; Sproull L, 2011, DAEDALUS-US, V140, P140; O'Brien …	71	0	0	4	4	SAGE PUBLICATIONS INC	THOUSAND OAKS	2455 TELLER RD, THOUSAND OAKS, CA 91320 USA	1075-5470	1552-8545		SCI COMMUN	Sci. Commun.	DEC	2015	37	6
J	Pallett, H				Pallett, Helen			Public Participation Organizations and Open Policy: A Constitutional Moment for British Democracy?	SCIENCE COMMUNICATION			English	Article						open policy; public participation; constitutional moments; organizations of participation	CLIMATE-CHANGE; SCIENCE; ENGAGEMENT; KNOWLEDGE; CITIZENSHIP; REFLEXIVITY; TECHNOLOGY; GOVERNANCE; DIALOGUE; UK	This article builds on work in Science and Technology Studies and cognate disciplines concerning the institutionalization of public engagement and participation practices. It describes and analyses ethnographic qualitative research into one organization of participation, the UK government-funded Sciencewise program. Sciencewise's interactions with broader political developments are explored, incl…	[Pallett, Helen] Univ E Anglia, Sch Environm Sci, Norwich NR4 7TJ, Norfolk, England	Pallett, H (reprint author), Univ E Anglia, Sci Soc & Sustainabil Res Grp 3S, Sch Environm Sci, Norwich Res Pk, Norwich NR4 7TJ, Norfolk, England.	h.pallett@uea.ac.uk			ESRC [ES/I022120/1]	The author(s) disclosed receipt of the following financial support for the research, authorship, and/or publication of this article: This article draws on research funded as part of an ESRC 1+3 PhD studentship (number ES/I022120/1).	Chilvers J, 2013, SCI COMMUN, V35, P283, DOI 10.1177/1075547012454598; Tlili A, 2010, MINERVA, V48, P429, DOI 10.1007/s11024-010-9160-0; Horst M, 2010, SOC STUD SCI, V40, P105, DOI 10.1177/0306312709341500; Wynne B, 2006, COMMUNITY GENET, V9, P211, DOI 10.1159/000092659; Wynne B, 2008, PUBLIC UNDERST SCI, V17, P21, DOI 10.1177/0963662507085162; Irwin A, 2006, SOC STUD SCI, V36, P299, DOI 10.1177/…	69	0	0	0	0	SAGE PUBLICATIONS INC	THOUSAND OAKS	2455 TELLER RD, THOUSAND OAKS, CA 91320 USA	1075-5470	1552-8545		SCI COMMUN	Sci. Commun.	DEC	2015	37	6
J	Pearson, AR; Schuldt, JP				Pearson, Adam R.; Schuldt, Jonathon P.			Bridging Climate Communication Divides: Beyond the Partisan Gap	SCIENCE COMMUNICATION			English	Editorial Material						climate change; environment; intragroup processes; intergroup relations; social cognition	SCIENCE; PERCEPTIONS; PSYCHOLOGY; IMPACT; POLICY; PARTY	Social divides on climate change are often attributed to political factors, but new psychological research points to a wide range of group influences beyond politics that shape public opinion on climate change. We highlight two commonly overlooked sources of influence that represent key underutilized leverage points for public outreach: (1) the roles of racial, ethnic, and cultural identities and…	[Pearson, Adam R.] Pomona Coll, Psychol, Claremont, CA 91711 USA; [Pearson, Adam R.] Princeton Univ, Princeton, NJ 08544 USA; [Schuldt, Jonathon P.] Cornell Univ, Commun, Ithaca, NY USA; [Schuldt, Jonathon P.] Atkinson Ctr Sustainable Future, Ithaca, NY USA	Pearson, AR (reprint author), Pomona Coll, Dept Psychol, 647 North,Coll Way, Claremont, CA 91711 USA.	adam.pearson@pomona.edu					Morling B, 2008, PERS SOC PSYCHOL REV, V12, P199, DOI 10.1177/1088868308318260; Hong L, 2004, P NATL ACAD SCI USA, V101, P16385, DOI 10.1073/pnas.0403723101; Nolan JM, 2008, PERS SOC PSYCHOL B, V34, P913, DOI 10.1177/0146167208316691; Levine SS, 2014, P NATL ACAD SCI USA, V111, P18524, DOI 10.1073/pnas.1407301111; Ding D, 2011, NAT CLIM CHANGE, V1, P462, DOI 10.1038/NCLIMATE1295; Kahan DM, 2012, …	23	0	0	3	3	SAGE PUBLICATIONS INC	THOUSAND OAKS	2455 TELLER RD, THOUSAND OAKS, CA 91320 USA	1075-5470	1552-8545		SCI COMMUN	Sci. Commun.	DEC	2015	37	6
J	Resnik, DB; Elliott, KC; Miller, AK				Resnik, David B.; Elliott, Kevin C.; Miller, Aubrey K.			A framework for addressing ethical issues in citizen science	ENVIRONMENTAL SCIENCE & POLICY			English	Article						Citizen science; Ethics; Public; Collaboration; Data collection; Community-based research	PARTICIPATORY RESEARCH; SCIENTIFIC-RESEARCH; ECOLOGICAL RESEARCH; LESSONS; TOOL; AIR; BIODIVERSITY; POLICY; VALUES; UK	The collaboration between laypeople and professional scientists known as "citizen science" is an important trend in research and data gathering. Citizen science offers important benefits to science and society. For example, citizens can help scientists with data collection and provide advice on research design and implementation. Citizens can also gain a better understanding of scientific concept…	[Resnik, David B.; Miller, Aubrey K.] NIEHS, NIH, Res Triangle Pk, NC 27709 USA; [Elliott, Kevin C.] Michigan State Univ, Lyman Briggs Coll, E Lansing, MI 48824 USA; [Elliott, Kevin C.] Michigan State Univ, Dept Fisheries & Wildlife, E Lansing, MI 48824 USA; [Elliott, Kevin C.] Michigan State Univ, Dept Philosophy, E Lansing, MI 48824 USA	Resnik, DB (reprint author), NIEHS, NIH, Res Triangle Pk, NC 27709 USA.	resnikd@niehs.nih.gov			intramural program of the National Institute of Environmental Health Sciences (NIEHS), National Institutes of Health (NIH)	This research is supported, in part, by the intramural program of the National Institute of Environmental Health Sciences (NIEHS), National Institutes of Health (NIH). It does not represent the views of the NIEHS, NIH, or U.S. government.	Donnelly A, 2014, INT J BIOMETEOROL, V58, P1237, DOI 10.1007/s00484-013-0717-0; Gallo T, 2011, BIOSCIENCE, V61, P459, DOI 10.1525/bio.2011.61.6.8; Elliott KC, 2015, BIOSCIENCE, V65, P5, DOI 10.1093/biosci/biu197; Elliott KC, 2014, INT LIBR ETH LAW TEC, V10, P147, DOI 10.1007/978-1-4020-6817-1_10; Elliott KC, 2014, ENVIRON HEALTH PERSP, V122, P647, DOI 10.1289/ehp.1408107; Resnik DB, 2010, ACCOUNT…	65	0	0	35	35	ELSEVIER SCI LTD	OXFORD	THE BOULEVARD, LANGFORD LANE, KIDLINGTON, OXFORD OX5 1GB, OXON, ENGLAND	1462-9011	1873-6416		ENVIRON SCI POLICY	Environ. Sci. Policy	DEC	2015	54
J	Brimblecombe, P; Ning, Z				Brimblecombe, Peter; Ning, Zhi			Effect of road blockages on local air pollution during the Hong Kong protests and its implications for air quality management	SCIENCE OF THE TOTAL ENVIRONMENT			English	Article						Ozone; Carbon monoxide; Nitrogen oxides; Particulate matter; Community-based monitoring; Traffic blockages; Traffic diversions	SOURCE APPORTIONMENT; EMISSIONS; IMPACT; PM2.5; TRANSPORT; POLICY; OZONE; AREA	Roadside air quality in urban areas is largely affected by the traffic emissions. Changes in emissions and transport control policy are often assumed to yield benefits in air quality, but have often not always been effective in producing perceptible improvements due to the complexity of meteorological conditions. This study evaluates the air quality before, during and after a temporary roadway bl…	[Brimblecombe, Peter; Ning, Zhi] City Univ Hong Kong, Sch Energy & Environm, Kowloon, Hong Kong, Peoples R China	Brimblecombe, P (reprint author), City Univ Hong Kong, Sch Energy & Environm, Kowloon, Hong Kong, Peoples R China.	pbrimble@cityu.edu.hk			City University of Hong Kong [9380071]; Guy Carpenter Climate Change Centre [9360126]; Research Grants Council of the Hong Kong SAR [CityU 21201214]	This study was supported by the grants from City University of Hong Kong (Project No. 9380071) and the Guy Carpenter Climate Change Centre (Project No. 9360126). The authors would also like to acknowledge the support from the Research Grants Council of the Hong Kong SAR (Project No. CityU 21201214). The authors appreciated the thoughts of Yutong Xu on the effects of the protests and the provision…	Zheng M, 2006, J GEOPHYS RES-ATMOS, V111, DOI 10.1029/2006JD007074; Li YC, 2013, ATMOS RES, V120, P88, DOI 10.1016/j.atmosres.2012.08.005; Louie PKK, 2005, ATMOS ENVIRON, V39, P1695, DOI 10.1016/j.atmosenv.2004.11.017; Wang XK, 2006, CHEMOSPHERE, V63, P1261, DOI 10.1016/j.chemosphere.2005.10.031; Beevers SD, 2005, ATMOS ENVIRON, V39, P1, DOI 10.1016/j.atmosenv.2004.10.001; Atkinson RW, 2009, ATMO…	26	0	0	60	60	ELSEVIER SCIENCE BV	AMSTERDAM	PO BOX 211, 1000 AE AMSTERDAM, NETHERLANDS	0048-9697	1879-1026		SCI TOTAL ENVIRON	Sci. Total Environ.	2015-12-01	2015	536
J	Rossiter, DG; Liu, J; Carlisle, S; Zhu, AX				Rossiter, David G.; Liu, Jing; Carlisle, Steve; Zhu, A. -Xing			Can citizen science assist digital soil mapping?	GEODERMA			English	Article						Predictive soil mapping; Unsystematic observations; Opportunistic sampling; Quality assurance	CLASSIFICATION TREES; MANAGEMENT; KNOWLEDGE; INFORMATION; VARIABILITY; VALIDATION; NETWORK; SCALE; MAPS; USA	The essential element of citizen science is the participation of non-specialists in scientific research. The citizen acts as an observer or experimenter within structures established by a project run by professional scientists. The recent explosion in projects is due to the development of enabling technology, exemplified by the spatially-enabled "smart" phone with mapping applications and its sup…	[Rossiter, David G.] Cornell Univ, Dept Crop & Soil Sci, Ithaca, NY 14850 USA; [Rossiter, David G.] Chinese Acad Sci, Nanjing Soil Sci Inst, Nanjing 210008, Jiangsu, Peoples R China; [Liu, Jing; Zhu, A. -Xing] Univ Wisconsin, Dept Geog, Madison, WI 53706 USA; [Zhu, A. -Xing] Nanjing Normal Univ, Sch Geog, Nanjing 210023, Jiangsu, Peoples R China	Rossiter, DG (reprint author), Cornell Univ, Dept Crop & Soil Sci, Ithaca, NY 14850 USA.	dgr2@comell.edu; jliu93@wisc.edu; soilscientist1@gmail.com; azhu@wisc.edu					Agriculture and Agri-Food Canada, 2013, CAN SOIL INF SERV; McBratney A, 2014, GEODERMA, V213, P203, DOI 10.1016/j.geoderma.2013.08.013; Sudduth KA, 2005, COMPUT ELECTRON AGR, V46, P263, DOI 10.1016/j.compag.2004.11.010; Fridgen JJ, 2004, AGRON J, V96, P100; Arrouays D, 2014, ADV AGRON, V125, P93, DOI 10.1016/B978-0-12-800137-0.00003-0; D'Or D, 2001, STOCH ENV RES RISK A, V15, P87, DOI 10.1007/s00…	47	1	1	75	75	ELSEVIER SCIENCE BV	AMSTERDAM	PO BOX 211, 1000 AE AMSTERDAM, NETHERLANDS	0016-7061	1872-6259		GEODERMA	Geoderma	DEC	2015	259
J	Westgate, MJ; Scheele, BC; Ikin, K; Hoefer, AM; Beaty, RM; Evans, M; Osborne, W; Hunter, D; Rayner, L; Driscoll, DA				Westgate, Martin J.; Scheele, Ben C.; Ikin, Karen; Hoefer, Anke Maria; Beaty, R. Matthew; Evans, Murray; Osborne, Will; Hunter, David; Rayner, Laura; Driscoll, Don A.			Citizen Science Program Shows Urban Areas Have Lower Occurrence of Frog Species, but Not Accelerated Declines	PLOS ONE			English	Article							BIODIVERSITY CONSERVATION; ECOLOGICAL RESEARCH; COMMUNITY STRUCTURE; EXTINCTION; LANDSCAPE; ABUNDANCE; RICHNESS; HABITAT; TOOL; CHRONOSEQUENCES	Understanding the influence of landscape change on animal populations is critical to inform biodiversity conservation efforts. A particularly important goal is to understand how urban density affects the persistence of animal populations through time, and how these impacts can be mediated by habitat provision; but data on this question are limited for some taxa. Here, we use data from a citizen s…	[Westgate, Martin J.; Scheele, Ben C.; Ikin, Karen; Rayner, Laura] Australian Natl Univ, Fenner Sch Environm & Soc, Canberra, ACT 2601, Australia; [Ikin, Karen; Driscoll, Don A.] Australian Natl Univ, ARC Ctr Excellence Environm Decis, Canberra, ACT 2601, Australia; [Hoefer, Anke Maria] ACT & Reg Frogwatch, Ginninderra Catchment Grp, Canberra, ACT 2615, Australia; [Beaty, R. Matthew] CSIRO Land &…	Westgate, MJ (reprint author), Australian Natl Univ, Fenner Sch Environm & Soc, GPO Box 4, Canberra, ACT 2601, Australia.	martin.westgate@anu.edu.au			Ginninderra Catchment Group; ACT Government's Environment and Planning Directorate; Australian Government's 'Caring for Country' scheme; Australian Research Council Centre of Excellence for Environmental Decisions	ACT Frogwatch and region is supported by the Ginninderra Catchment Group, and has received funding from the ACT Government's Environment and Planning Directorate and the Australian Government's 'Caring for Country' scheme. The Australian Research Council Centre of Excellence for Environmental Decisions funded publication of this research. The funders had no role in study design, data collection a…	Vredenburg VT, 2010, P NATL ACAD SCI USA, V107, P9689, DOI 10.1073/pnas.0914111107; Hitchings SP, 1997, HEREDITY, V79, P117, DOI 10.1038/hdy.1997.134; Szabo JK, 2010, ECOL APPL, V20, P2157, DOI 10.1890/09-0877.1; Bolker BM, 2009, TRENDS ECOL EVOL, V24, P127, DOI 10.1016/j.tree.2008.10.008; Miller JR, 2005, TRENDS ECOL EVOL, V20, P430, DOI 10.1016/j.tree.2005.05.013; Shanahan DF, 2015, BIOSCIENCE,…	67	0	0	0	0	PUBLIC LIBRARY SCIENCE	SAN FRANCISCO	1160 BATTERY STREET, STE 100, SAN FRANCISCO, CA 94111 USA	1932-6203			PLOS ONE	PLoS One	2015-11-18	2015	10	11
J	Pennington, C; Freeborough, K; Dashwood, C; Dijkstra, T; Lawrie, K				Pennington, Catherine; Freeborough, Katy; Dashwood, Claire; Dijkstra, Tom; Lawrie, Kenneth			The National Landslide Database of Great Britain: Acquisition, communication and the role of social media	GEOMORPHOLOGY			English	Article						Landslide; Database; National; Twitter; Thresholds; Domains	PREDICTED CLIMATE-CHANGE; RAINFALL THRESHOLDS; INITIATION; ENGLAND; IMPACT; UK	The British Geological Survey (BGS) is the national geological agency for Great Britain that provides geoscientific information to government, other institutions and the public. The National Landslide Database has been developed by the BGS and is the focus for national geohazard research for landslides in Great Britain. The history and structure of the geospatial database and associated Geographi…	[Pennington, Catherine; Freeborough, Katy; Dashwood, Claire; Dijkstra, Tom; Lawrie, Kenneth] British Geol Survey, Keyworth NG12 5GG, Notts, England	Pennington, C (reprint author), British Geol Survey, Keyworth NG12 5GG, Notts, England.	cpoulton@bgs.ac.uk; karo@bgs.ac.uk; cfoster@bgs.ac.uk; tomdij@bgs.ac.uk; kigl@bgs.ac.uk					Guzzetti F, 2007, METEOROL ATMOS PHYS, V98, P239, DOI 10.1007/s00703-007-0262-7; Martelloni G, 2012, LANDSLIDES, V9, P485, DOI 10.1007/s10346-011-0308-2; Dixon N, 2007, LANDSLIDES, V4, P137, DOI 10.1007/s10346-006-0071-y; van Westen CJ, 2006, B ENG GEOL ENVIRON, V65, P167, DOI 10.1007/s10064-005-0023-0; Van Asch TWJ, 1999, GEOMORPHOLOGY, V30, P25, DOI 10.1016/S0169-555X(99)00042-2; Clarke D, 2010…	48	0	0	18	18	ELSEVIER SCIENCE BV	AMSTERDAM	PO BOX 211, 1000 AE AMSTERDAM, NETHERLANDS	0169-555X	1872-695X		GEOMORPHOLOGY	Geomorphology	2015-11-15	2015	249				SI
J	Breuer, L; Hiery, N; Kraft, P; Bach, M; Aubert, AH; Frede, HG				Breuer, Lutz; Hiery, Noreen; Kraft, Philipp; Bach, Martin; Aubert, Alice H.; Frede, Hans-Georg			HydroCrowd: a citizen science snapshot to assess the spatial control of nitrogen solutes in surface waters	SCIENTIFIC REPORTS			English	Article							DISSOLVED ORGANIC NITROGEN; LAND-USE; DRIFT-BOTTLE; EXPORT; SOILS; CARBON; CYCLE; ECOSYSTEMS; CATCHMENT; QUALITY	We organized a crowdsourcing experiment in the form of a snapshot sampling campaign to assess the spatial distribution of nitrogen solutes, namely, nitrate, ammonium and dissolved organic nitrogen (DON), in German surface waters. In particular, we investigated (i) whether crowdsourcing is a reasonable sampling method in hydrology and (ii) what the effects of population density, soil humus content…	[Breuer, Lutz; Hiery, Noreen; Kraft, Philipp; Bach, Martin; Aubert, Alice H.; Frede, Hans-Georg] Univ Giessen, Res Ctr BioSyst Land Use & Nutr IFZ, Inst Landscape Ecol & Resources Management ILR, D-35390 Giessen, Germany; [Breuer, Lutz] Univ Giessen, Ctr Int Dev & Environm Res, D-35392 Giessen, Germany	Breuer, L (reprint author), Univ Giessen, Res Ctr BioSyst Land Use & Nutr IFZ, Inst Landscape Ecol & Resources Management ILR, Heinrich Buff Ring 26, D-35390 Giessen, Germany.	Breuer@umwelt.uni-giessen.de					Wohlfart T, 2012, BIOGEOSCIENCES, V9, P4513, DOI 10.5194/bg-9-4513-2012; Silvestro F, 2012, NAT HAZARD EARTH SYS, V12, P2743, DOI 10.5194/nhess-12-2743-2012; Fienen MN, 2012, COMPUT GEOSCI-UK, V49, P164, DOI 10.1016/j.cageo.2012.06.015; Kalbitz K, 2000, SOIL SCI, V165, P277, DOI 10.1097/00010694-200004000-00001; Worrall F, 2001, J HYDROL, V243, P228, DOI 10.1016/S0022-1694(00)00411-X; Randall GW,…	47	0	0	3	3	NATURE PUBLISHING GROUP	LONDON	MACMILLAN BUILDING, 4 CRINAN ST, LONDON N1 9XW, ENGLAND	2045-2322			SCI REP-UK	Sci Rep	2015-11-12	2015	5
J	Jackson, MM; Gergel, SE; Martin, K				Jackson, Michelle M.; Gergel, Sarah E.; Martin, Kathy			Effects of Climate Change on Habitat Availability and Configuration for an Endemic Coastal Alpine Bird	PLOS ONE			English	Article							WHITE-TAILED PTARMIGAN; PRESENCE-ONLY DATA; VANCOUVER-ISLAND; MODEL PROJECTIONS; LAGOPUS-LEUCURUS; BRITISH-COLUMBIA; ENVELOPE MODELS; RANDOM FORESTS; RANGE; IMPACTS	North America's coastal mountains are particularly vulnerable to climate change, yet harbour a number of endemic species. With little room "at the top" to track shifting climate envelopes, alpine species may be especially negatively affected by climate-induced habitat fragmentation. We ask how climate change will affect the total amount, mean patch size, and number of patches of suitable habitat …	[Jackson, Michelle M.; Gergel, Sarah E.; Martin, Kathy] Univ British Columbia, Dept Forest & Conservat Sci, Vancouver, BC V6T 1Z4, Canada; [Martin, Kathy] Environm Canada, Delta, BC V4K 3N2, Canada	Jackson, MM (reprint author), Univ British Columbia, Dept Forest & Conservat Sci, 2424 Main Mall, Vancouver, BC V6T 1Z4, Canada.	michellegooch@gmail.com			TerreWEB; Natural Sciences and Engineering Research Council of Canada (NSERC); Collaborative Research and Training Experience (CREATE) fellowship program at the University of British Columbia; NSERC [147390-2010]; Forest Renewal British Columbia [16R81811]; Environment Canada [16R31929]	Funding for this research was provided by TerreWEB (http://terreweb.ubc.ca), a Natural Sciences and Engineering Research Council of Canada (NSERC; http://www.nserc-crsng.gc.ca) Collaborative Research and Training Experience (CREATE) fellowship program at the University of British Columbia to M.J. NSERC provided support to several undergraduate student technicians (Undergraduate Research Student A…	MONSERUD RA, 1992, ECOL MODEL, V62, P275, DOI 10.1016/0304-3800(92)90003-W; Jiguet F, 2013, BIRD STUDY, V60, P60, DOI 10.1080/00063657.2012.733337; Essl F, 2009, BIOL CONSERV, V142, P2547, DOI 10.1016/j.biocon.2009.05.027; Zarnetske PL, 2007, ECOL APPL, V17, P1714, DOI 10.1890/06-1312.1; VEGHTE JH, 1965, PHYSIOL ZOOL, V38, P267; Le Viol I, 2012, BIOL LETTERS, V8, P780, DOI 10.1098/rsbl.2012.0496;…	81	0	0	0	0	PUBLIC LIBRARY SCIENCE	SAN FRANCISCO	1160 BATTERY STREET, STE 100, SAN FRANCISCO, CA 94111 USA	1932-6203			PLOS ONE	PLoS One	2015-11-03	2015	10	11
J	Newson, SE; Evans, HE; Gillings, S				Newson, Stuart E.; Evans, Hazel E.; Gillings, Simon			A novel citizen science approach for large-scale standardised monitoring of bat activity and distribution, evaluated in eastern England	BIOLOGICAL CONSERVATION			English	Article						Bats; Chiroptera; Survey methods; Bat activity; Species distribution; Citizen science; Automated acoustic monitoring	BREEDING BIRD SURVEY; GENERALIZED ADDITIVE-MODELS; SPECIES DISTRIBUTIONS; HABITAT SUITABILITY; RANDOM FORESTS; CONSERVATION; ABUNDANCE; POPULATIONS; PREDICTION; TRENDS	In many countries, bats have high conservation prioritisation owing to their trophic position, habitat associations and threat level, and many have dedicated management plans. However, poor knowledge of species' ecology, identification issues and surveying challenges mean that large-scale monitoring to produce required distribution and abundance information is less developed than for some other t…	[Newson, Stuart E.; Evans, Hazel E.; Gillings, Simon] The Nunnery, British Trust Ornithol, Thetford IP24 2PU, Norfolk, England	Newson, SE (reprint author), The Nunnery, British Trust Ornithol, Thetford IP24 2PU, Norfolk, England.	stuart.newson@bto.org			People's Trust for Endangered Species (PTES); Defra (Defra Fund for Biodiversity Recording in the Voluntary Sector); NBIS (the Norfolk Biological Records Centre)	We are extremely grateful to everyone who took part, hosted equipment or helped in other ways to make this project so successful. These analyses were funded by the People's Trust for Endangered Species (PTES). The Norfolk Bat Survey was originally set up in 2013 with funding from the PTES and Defra (Defra Fund for Biodiversity Recording in the Voluntary Sector), in collaboration with NBIS (the No…	Agranat I., 2014, DETECTING BATS ULTRA; Thogmartin WE, 2006, AUK, V123, P892, DOI 10.1642/0004-8038(2006)123[892:AROTPE]2.0.CO;2; de Heer M, 2005, PHILOS T ROY SOC B, V360, P297, DOI 10.1098/rstb.2004.1587; Iverson LR, 1998, ECOL MONOGR, V68, P465, DOI 10.1890/0012-9615(1998)068[0465:PAOTSF]2.0.CO;2; Sherwin RE, 2000, ACTA CHIROPTEROL, V2, P145; Butchart SHM, 2010, SCIENCE, V328, P1164, DOI 10.11…	75	0	0	5	5	ELSEVIER SCI LTD	OXFORD	THE BOULEVARD, LANGFORD LANE, KIDLINGTON, OXFORD OX5 1GB, OXON, ENGLAND	0006-3207	1873-2917		BIOL CONSERV	Biol. Conserv.	NOV	2015	191
J	Galan-Diaz, C; Edwards, P; Nelson, JD; van der Wal, R				Galan-Diaz, Carlos; Edwards, Peter; Nelson, John D.; van der Wal, Rene			Digital innovation through partnership between nature conservation organisations and academia: A qualitative impact assessment	AMBIO			English	Article						Digital technologies; Impact; Impact assessment; Nature conservation; Partnership working with academia	CITIZEN SCIENCE; STAKEHOLDER ENGAGEMENT; ENVIRONMENTAL-RESEARCH; ECOLOGICAL RESEARCH; KNOWLEDGE; MODELS; TOOL	Nature conservation organisations increasingly turn to new digital technologies to help deliver conservation objectives. This has led to collaborative forms of working with academia to spearhead digital innovation. Through in-depth interviews with three UK research-council-funded case studies, we show that by working with academics conservation organisations can receive positive and negative impa…	[Galan-Diaz, Carlos; Edwards, Peter; Nelson, John D.] Univ Aberdeen, Kings Coll, Dot Rural RCUK Digital Econ Research, Aberdeen AB24 5UA, Scotland; [van der Wal, Rene] Univ Aberdeen, Sch Biol Sci, ACES, Aberdeen AB24 3UU, Scotland	Galan-Diaz, C (reprint author), Univ Aberdeen, Kings Coll, Dot Rural RCUK Digital Econ Research, MacRobert Bldg, Aberdeen AB24 5UA, Scotland.	pozaicer@yahoo.com; p.edwards@abdn.ac.uk; j.d.nelson@abdn.ac.uk; r.vanderwal@abdn.ac.uk	Galan-Diaz, Carlos/A-4184-2009	Galan-Diaz, Carlos/0000-0002-9006-5670	RCUK dot.rural Digital economy Research Hub, University of Aberdeen [EP/G066051/1]	We would like to thank all interviewees for sharing their experiences of working with academics, and the guest editor and three anonymous reviewers for valuable comments on earlier versions of the work. The research in this paper is supported by the RCUK dot.rural Digital economy Research Hub, University of Aberdeen (Grant reference: EP/G066051/1).	Abreu M, 2009, KNOWLEDGE EXCHANGE A; Pohl C, 2005, FUTURES, V37, P1159, DOI 10.1016/j.futures.2005.02.009; Bonney R, 2009, BIOSCIENCE, V59, P977, DOI 10.1525/bio.2009.59.11.9; Dickinson JL, 2012, FRONT ECOL ENVIRON, V10, P291, DOI 10.1890/110236; Irvine RJ, 2009, J APPL ECOL, V46, P344, DOI 10.1111/j.1365-2664.2009.01626.x; O'Brien L, 2013, SCI PUBL POLICY, V40, P51, DOI 10.1093/scipol/scs120; Ph…	39	0	0	7	7	SPRINGER	DORDRECHT	VAN GODEWIJCKSTRAAT 30, 3311 GZ DORDRECHT, NETHERLANDS	0044-7447	1654-7209		AMBIO	Ambio	NOV	2015	44			4	SI
J	Kelling, S; Fink, D; La Sorte, FA; Johnston, A; Bruns, NE; Hochachka, WM				Kelling, Steve; Fink, Daniel; La Sorte, Frank A.; Johnston, Alison; Bruns, Nicholas E.; Hochachka, Wesley M.			Taking a 'Big Data' approach to data quality in a citizen science project	AMBIO			English	Article						Biodiversity monitoring; Citizen science; eBird; Data quality; Species distribution models	DATA-INTENSIVE SCIENCE; BREEDING BIRD SURVEY; MODELS; CONSERVATION; POPULATION; EBIRD; BIODIVERSITY; ECOLOGY; NETWORK; TOOL	Data from well-designed experiments provide the strongest evidence of causation in biodiversity studies. However, for many species the collection of these data is not scalable to the spatial and temporal extents required to understand patterns at the population level. Only data collected from citizen science projects can gather sufficient quantities of data, but data collected from volunteers are…	[Kelling, Steve; Fink, Daniel; La Sorte, Frank A.; Bruns, Nicholas E.; Hochachka, Wesley M.] Cornell Univ, Cornell Lab Ornithol, Ithaca, NY 14850 USA	Kelling, S (reprint author), Cornell Univ, Cornell Lab Ornithol, 158 Sapsucker Woods Rd, Ithaca, NY 14850 USA.	stk2@cornell.edu; df36@cornell.edu; fal42@cornell.edu; Alison.Johnston@bto.org; neb76@cornell.edu; wmh6@cornell.edu			Leon Levy Foundation; Wolf Creek Foundation; Seaver Institute; NASA; National Science Foundation [DBI-1356308, IIS-1238371, IIS-120589, EF-0427914, DBI-0542868, IIS-0612031]; [CNS-1059284]; [OCI-1053575]; [DEB-110008]	This work was funded by The Leon Levy Foundation, The Wolf Creek Foundation, The Seaver Institute, NASA, and the following National Science Foundation awards: ABI Sustaining: DBI-1356308, CDI: IIS-1238371, SoCS: IIS-120589, ITR: EF-0427914, ABI: DBI-0542868, and SEI + II: IIS-0612031 with computing support from CNS-1059284, OCI-1053575, and DEB-110008.	La Sorte FA, 2013, ECOLOGY, V94, P1839, DOI 10.1890/12-1768.1; Friedl MA, 2010, REMOTE SENS ENVIRON, V114, P168, DOI 10.1016/j.rse.2009.08.016; Friedman JH, 2001, ANN STAT, V29, P1189, DOI 10.1214/aos/1013203451; Kelling S, 2013, AI MAG, V34, P10; Kelling S, 2009, BIOSCIENCE, V59, P613, DOI 10.1525/bio.2009.59.7.12; Hansen MC, 2000, INT J REMOTE SENS, V21, P1331, DOI 10.1080/014311600210209; Bonn…	41	1	1	9	9	SPRINGER	DORDRECHT	VAN GODEWIJCKSTRAAT 30, 3311 GZ DORDRECHT, NETHERLANDS	0044-7447	1654-7209		AMBIO	Ambio	NOV	2015	44			4	SI
J	van der Wal, R; Anderson, H; Robinson, A; Sharma, N; Mellish, C; Roberts, S; Darvill, B; Siddharthan, A				van der Wal, Rene; Anderson, Helen; Robinson, Annie; Sharma, Nirwan; Mellish, Chris; Roberts, Stuart; Darvill, Ben; Siddharthan, Advaith			Mapping species distributions: A comparison of skilled naturalist and lay citizen science recording	AMBIO			English	Article						BeeWatch; Biological recording; Bumblebees; Citizen science; National Biodiversity Network; Species distribution	BIODIVERSITY; CONSERVATION; UK	To assess the ability of traditional biological recording schemes and lay citizen science approaches to gather data on species distributions and changes therein, we examined bumblebee records from the UK's national repository (National Biodiversity Network) and from BeeWatch. The two recording approaches revealed similar relative abundances of bumblebee species but different geographical distribu…	[van der Wal, Rene] Univ Aberdeen, Sch Biol Sci, Aberdeen Ctr Environm Sustainabil, Aberdeen AB24 3UU, Scotland; [Anderson, Helen; Robinson, Annie] Univ Aberdeen, Sch Biol Sci, Aberdeen AB24 3UU, Scotland; [Anderson, Helen] Univ Tromso, Dept Arctic & Marine Biol, Fac Biosci Fisheries & Econ, N-9037 Tromso, Norway; [Sharma, Nirwan] Univ Aberdeen, Dot Rural Digital Econ Hub, Aberdeen AB24 5UA, Scot…	van der Wal, R (reprint author), Univ Aberdeen, Sch Biol Sci, Aberdeen Ctr Environm Sustainabil, Aberdeen AB24 3UU, Scotland.	r.vanderwal@abdn.ac.uk; helen.anderson@uit.no; annierobinson@abdn.ac.uk; n.sharma@abdn.ac.uk; c.mellish@abdn.ac.uk; stuart.roberts@cantab.net; ben.darvill@bto.org; advaith@abdn.ac.uk					Alford D.V., 1980, ATLAS BUMBLEBEES BRI; Ellis R, 2011, SOC STUD SCI, V41, P769, DOI 10.1177/0306312711423432; Isaac NJB, 2014, METHODS ECOL EVOL, V5, P1052, DOI 10.1111/2041-210X.12254; Greenwood JJD, 2007, J ORNITHOL, V148, pS77, DOI 10.1007/s10336-007-0239-9; Barbet-Massin M, 2012, METHODS ECOL EVOL, V3, P327, DOI 10.1111/j.2041-210X.2011.00172.x; [Anonymous], 2012, INT J ZOOL, DOI DOI 10.1155…	39	0	0	6	6	SPRINGER	DORDRECHT	VAN GODEWIJCKSTRAAT 30, 3311 GZ DORDRECHT, NETHERLANDS	0044-7447	1654-7209		AMBIO	Ambio	NOV	2015	44			4	SI
J	Verma, A; van der Wal, R; Fischer, A				Verma, Audrey; van der Wal, Rene; Fischer, Anke			Microscope and spectacle: On the complexities of using new visual technologies to communicate about wildlife conservation	AMBIO			English	Article						Public engagement; Environmental communication; Visual technology; Wildlife conservation	BIODIVERSITY CONSERVATION; ENVIRONMENT; EDUCATION	Wildlife conservation-related organisations increasingly employ new visual technologies in their science communication and public engagement efforts. Here, we examine the use of such technologies for wildlife conservation campaigns. We obtained empirical data from four UK-based organisations through semi-structured interviews and participant observation. Visual technologies were used to provide t…	[Verma, Audrey] Univ Aberdeen, Sch Biol Sci, Aberdeen AB24 3UU, Scotland; [van der Wal, Rene] Univ Aberdeen, Sch Biol Sci, ACES, Aberdeen AB24 3UU, Scotland; [Fischer, Anke] James Hutton Inst, Social Econ & Geog Sci Grp, Aberdeen AB15 8QH, Scotland	Verma, A (reprint author), Univ Aberdeen, Sch Biol Sci, 23 St Machar Dr, Aberdeen AB24 3UU, Scotland.	audrey.vermajames@gmail.com; r.vanderwal@abdn.ac.uk; anke.fischer@hutton.ac.uk			James Hutton Institute; dot.rural Digital Economy Hub, the University of Aberdeen	We thank our interviewees for granting us access to data and permission to use images; dot.rural Digital Economy Hub, the University of Aberdeen, and the James Hutton Institute for funding and support; Gina Maffey, Tony James, Katrina Myrvang Brown, and two anonymous reviewers for their comments on earlier versions of the manuscript; and JP Vargheese for technical assistance.	Igoe J, 2010, CRIT ANTHROPOL, V30, P375, DOI 10.1177/0308275X10372468; Kahan D, 2010, NATURE, V463, P296, DOI 10.1038/463296a; Lorimer J, 2007, ENVIRON PLANN D, V25, P911, DOI 10.1068/d71j; Bickford D, 2012, BIOL CONSERV, V151, P74, DOI 10.1016/j.biocon.2011.12.016; Christophers B, 2006, GEOFORUM, V37, P973, DOI 10.1016/j.geoforum.2006.03.005; Rudiak-Gould P, 2013, WEATHER CLIM SOC, V5, P120, DOI…	50	0	0	1	1	SPRINGER	DORDRECHT	VAN GODEWIJCKSTRAAT 30, 3311 GZ DORDRECHT, NETHERLANDS	0044-7447	1654-7209		AMBIO	Ambio	NOV	2015	44			4	SI
J	Castilla, EP; Cunha, DGF; Lee, FWF; Loiselle, S; Ho, KC; Hall, C				Castilla, Eva Pintado; Fernandes Cunha, Davi Gasparini; Lee, Fred Wang Fat; Loiselle, Steven; Ho, Kin Chung; Hall, Charlotte			Quantification of phytoplankton bloom dynamics by citizen scientists in urban and peri-urban environments	ENVIRONMENTAL MONITORING AND ASSESSMENT			English	Article						Phytoplankton; Algal bloom monitoring; Urban ecosystems; Citizen science	FRESH-WATER; SUBTROPICAL RESERVOIRS; MISSISSIPPI RIVER; STREAM SYNDROME; LAND-USE; EUTROPHICATION; ECOSYSTEMS; NITROGEN; SCIENCE; LAKES	Freshwater ecosystems are severely threatened by urban development and agricultural intensification. Increased occurrence of algal blooms is a main issue, and the identification of local dynamics and drivers is hampered by a lack of field data. In this study, data from 13 cities (250 water bodies) were used to examine the capacity of trained community members to assess elevated phytoplankton dens…	[Castilla, Eva Pintado; Loiselle, Steven; Hall, Charlotte] Earthwatch Inst, Oxford, England; [Fernandes Cunha, Davi Gasparini] Univ Sao Paulo, Escola Engn Sao Carlos, Dept Hidraul & Saneamento, Sao Carlos, SP, Brazil; [Lee, Fred Wang Fat; Ho, Kin Chung] Open Univ Hong Kong, Sch Sci & Technol, Hong Kong, Hong Kong, Peoples R China	Loiselle, S (reprint author), Earthwatch Inst, 256 Banbury Rd, Oxford, England.	loiselle@unisi.it			HSBC Bank	We thank HSBC Bank for the financial support of the FreshWater Watch, under the scope of the HSBC Water Programme. We sincerely acknowledge the efforts of the citizen scientists who were active in the project and the participating project scientists. We thank two anonymous reviewers for their constructive suggestions to improve the manuscript.	Law AT, 2013, TALANTA, V114, P191, DOI 10.1016/j.talanta.2013.03.031; Meybeck M, 2003, PHILOS T R SOC B, V358, P1935, DOI 10.1098/rstb.2003.1379; Nicholson E, 2002, WATER SCI TECHNOL, V45, P193; Meyer JL, 2005, J N AM BENTHOL SOC, V24, P602, DOI 10.1899/0887-3593(2005)024\[0602:SEFIUL\]2.0.CO;2; Donnelly A, 2014, INT J BIOMETEOROL, V58, P1237, DOI 10.1007/s00484-013-0717-0; GITELSON A, 1993, INT …	75	0	0	11	11	SPRINGER	DORDRECHT	VAN GODEWIJCKSTRAAT 30, 3311 GZ DORDRECHT, NETHERLANDS	0167-6369	1573-2959		ENVIRON MONIT ASSESS	Environ. Monit. Assess.	NOV	2015	187	11
J	Pearce, W; Brown, B; Nerlich, B; Koteyko, N				Pearce, Warren; Brown, Brian; Nerlich, Brigitte; Koteyko, Nelya			Communicating climate change: conduits, content, and consensus	WILEY INTERDISCIPLINARY REVIEWS-CLIMATE CHANGE			English	Review							PUBLIC PERCEPTIONS; MIXED METHODS; SCIENCE COMMUNICATION; MEDIA REPRESENTATIONS; PEOPLE KNOW; BIG DATA; POLICY; POLARIZATION; FRACKING; POLITICS	Climate change has been the subject of increasing efforts by scientists to understand its causes and implications; it has been of growing interest to policymakers, international bodies, and a variety of nongovernment organizations; and it has attracted varied amounts of attention from traditional and, increasingly, online media. These developments have been aligned with shifts in the nature of cl…	[Pearce, Warren; Nerlich, Brigitte] Univ Nottingham, Sch Sociol & Social Policy, Inst Sci & Soc, Nottingham NG7 2RD, England; [Brown, Brian] De Montfort Univ, Fac Hlth & Life Sci, Leicester LE1 9BH, Leics, England; [Koteyko, Nelya] Univ London, Sch Languages Linguist & Film, London WC1E 7HU, England	Pearce, W (reprint author), Univ Nottingham, Sch Sociol & Social Policy, Inst Sci & Soc, Nottingham NG7 2RD, England.	warren.pearce@nottingham.ac.uk		Pearce, Warren/0000-0001-6884-3854	Leverhulme Trust [RP2011-SP-013]; Economic and Social Research Council [RES-062-23-1256]	Warren Pearce and Brigitte Nerlich acknowledge the support of the Leverhulme Trust through the Making Science Public program (RP2011-SP-013). The original 2010 article was supported through funding from the Economic and Social Research Council (RES-062-23-1256).	Abraham J, CLIMATE CONSENSUS 97; Andrews K, 2004, WORLD NEWSPAPER COVE; Carvalho A, 2005, RISK ANAL, V25, P1457, DOI 10.1111/j.1539-6925.2005.00692.x; Rockstrom J, 2014, EARTHS FUTURE, V2, P606, DOI 10.1002/2014EF000280; Bain PG, 2012, NAT CLIM CHANGE, V2, P600, DOI 10.1038/NCLIMATE1532; Hawkins E, 2014, NAT CLIM CHANGE, V4, P154; Lejano RP, 2013, ENVIRON SCI POLICY, V31, P61, DOI 10.1016/j.envsc…	136	0	0	18	18	WILEY-BLACKWELL	HOBOKEN	111 RIVER ST, HOBOKEN 07030-5774, NJ USA	1757-7780	1757-7799		WIRES CLIM CHANGE	Wiley Interdiscip. Rev.-Clim. Chang.	NOV-DEC	2015	6	6
J	[Anonymous]				[Anonymous]			Citizen Science Opportunity	AMERICAN SCIENTIST			English	Editorial Material																	0	0	0	9	9	SIGMA XI-SCI RES SOC	RES TRIANGLE PK	PO BOX 13975, RES TRIANGLE PK, NC 27709 USA	0003-0996	1545-2786		AM SCI	Am. Scientist	NOV-DEC	2015	103	6
J	Smith, DR; Robinson, TJ				Smith, David R.; Robinson, Timothy J.			Horseshoe Crab Spawning Activity in Delaware Bay, USA, After Harvest Reduction: A Mixed-Model Analysis	ESTUARIES AND COASTS			English	Article						Horseshoe crabs; Limulus polyphemus; Citizen science; Trend analysis; Hierarchical model	LIMULUS-POLYPHEMUS; CITIZEN SCIENCE; BEACH CHARACTERISTICS; ESTUARINE BEACH; POPULATION; EGGS; MIGRATION; SELECTION; BEHAVIOR; TOOL	A Delaware Bay, USA, standardized survey of spawning horseshoe crabs, Limulus polyphemus, was carried out in 1999 -aEuro parts per thousand 2013 through a citizen science network. Previous trend analyses of the data were at the state (DE or NJ) or bay-wide levels. Here, an alternative mixed-model regression analysis was used to estimate trends in female and male spawning densities at the beach le…	[Smith, David R.] US Geol Survey, Leetown Sci Ctr, Kearneysville, WV 25443 USA; [Robinson, Timothy J.] Univ Wyoming, Dept Stat, Laramie, WY 82071 USA	Smith, DR (reprint author), US Geol Survey, Leetown Sci Ctr, 11649 Leetown Rd, Kearneysville, WV 25443 USA.	drsmith@usgs.gov; tjrobin@uwyo.edu					Anderson Lyall I., 2003, P189; PENN D, 1994, BIOL BULL, V187, P373, DOI 10.2307/1542294; CASTRO G, 1993, AUK, V110, P927; Niles LJ, 2009, BIOSCIENCE, V59, P153, DOI 10.1525/bio.2009.59.2.8; Bonney R, 2009, BIOSCIENCE, V59, P977, DOI 10.1525/bio.2009.59.11.9; Smith DR, 2009, BIOLOGY AND CONSERVATION OF HORSESHOE CRABS, P361, DOI 10.1007/978-0-387-89959-6_23; Smith DR, 2006, FISHERIES, V31, P485, D…	39	0	0	4	4	SPRINGER	NEW YORK	233 SPRING ST, NEW YORK, NY 10013 USA	1559-2723	1559-2731		ESTUAR COAST	Estuaries Coasts	NOV	2015	38	6
J	Xu, LJ; Huang, BW; Wu, GS				Xu, Linjia; Huang, Biaowen; Wu, Guosheng			Mapping science communication scholarship in China: Content analysis on breadth, depth and agenda of published research	PUBLIC UNDERSTANDING OF SCIENCE			English	Article						China; content analysis; science communication; science popularization	HEALTH-COMMUNICATION	This study attempted to illuminate the cause and relation between government, scholars, disciplines, and societal aspects, presenting data from a content analysis of published research with the key word science communication(????)in the title or in the key words, including academic papers published in journals and dissertations from the China National Knowledge Infrastructure database. Of these, …	[Xu, Linjia] Univ Chinese Acad Sci, Dept Journalism & Commun, Beijing 100049, Peoples R China; [Huang, Biaowen] Beijing Jiaotong Univ, Dept Commun, Beijing, Peoples R China; [Wu, Guosheng] Peking Univ, Hist & Philosophy Sci, Beijing 100871, Peoples R China	Xu, LJ (reprint author), Univ Chinese Acad Sci, Dept Journalism & Commun, Beijing 100049, Peoples R China.	xulinjia@ucas.ac.cn; wugsh@pku.edu.cn					Zhou P, 2006, RES POLICY, V35, P83, DOI 10.1016/j.respol.2005.08.006; [Anonymous], 2010, ANN REPORT OUTLINE N, P4; [Anonymous], 2003, SCIENCE, V298, P49; Colson V, 2011, JOURNALISM, V12, P889, DOI 10.1177/1464884911412834; Corley EA, 2011, J NANOPART RES, V13, P7041, DOI 10.1007/s11051-011-0617-3; Bubela T, 2009, NAT BIOTECHNOL, V27, P514, DOI 10.1038/nbt0609-514; Kim JN, 2010, HEALTH COMMUN, V25…	34	0	0	12	12	SAGE PUBLICATIONS LTD	LONDON	1 OLIVERS YARD, 55 CITY ROAD, LONDON EC1Y 1SP, ENGLAND	0963-6625	1361-6609		PUBLIC UNDERST SCI	Public Underst. Sci.	NOV	2015	24	8
J	Shein, PP; Li, YY; Huang, TC				Shein, Paichi Pat; Li, Yuh-Yuh; Huang, Tai-Chu			The four cultures: Public engagement with science only, art only, neither, or both museums	PUBLIC UNDERSTANDING OF SCIENCE			English	Article						art and science; public understanding of science; science museums	CREATIVITY	This study uses an art-and-science comparative lens to understand the science culture, particularly the public engagement with science museums. A representational Taiwanese sample of 1863 subjects was categorized into four cultures, who visit science only, art only, neither, or both museums, resulting in six multivariate logistic regression models. Knowledge of science, interests in scientific an…	[Shein, Paichi Pat] Natl Sun Yat Sen Univ, Inst Educ, Kaohsiung 80424, Taiwan; [Shein, Paichi Pat] Natl Sun Yat Sen Univ, Ctr Teacher Educ, Kaohsiung 80424, Taiwan; [Li, Yuh-Yuh; Huang, Tai-Chu] Natl Sun Yat Sen Univ, Ctr Gen Educ, Kaohsiung 80424, Taiwan; [Li, Yuh-Yuh; Huang, Tai-Chu] Natl Sun Yat Sen Univ, Res Ctr Promoting Civ Literacy, Kaohsiung 80424, Taiwan	Li, YY (reprint author), Natl Sun Yat Sen Univ, Res Ctr Promoting Civ Literacy, 70 Lienhai Rd, Kaohsiung 80424, Taiwan.	yuhyl1210@gmail.com			Taiwan's Ministry of Science and Technology [NSC99-2511-S-110-007-MY2]	The research was supported by Taiwan's Ministry of Science and Technology under grant number NSC99-2511-S-110-007-MY2.	Adelman Leslie M., 2000, Curator, V43, P33; Anderson D., 2002, CURATOR, V45, P213; Dawson E, 2014, SCI EDUC, V98, P981, DOI 10.1002/sce.21133; Haden CA, 2014, EARLY CHILD RES Q, V29, P333, DOI 10.1016/j.ecresq.2014.04.004; Rennie LJ, 2003, INT J SCI EDUC, V25, P759, DOI 10.1080/0950069032000076670; Falk JH, 2011, J RES SCI TEACH, V48, P1, DOI 10.1002/tea.20394; Furnham A, 2008, PERS INDIV DIFFER,…	52	0	0	2	2	SAGE PUBLICATIONS LTD	LONDON	1 OLIVERS YARD, 55 CITY ROAD, LONDON EC1Y 1SP, ENGLAND	0963-6625	1361-6609		PUBLIC UNDERST SCI	Public Underst. Sci.	NOV	2015	24	8
J	Harpur, BA; Chapman, NC; Krimus, L; Maciukiewicz, P; Sandhu, V; Sood, K; Lim, J; Rinderer, TE; Allsopp, MH; Oldroyd, BP; Zayed, A				Harpur, B. A.; Chapman, N. C.; Krimus, L.; Maciukiewicz, P.; Sandhu, V.; Sood, K.; Lim, J.; Rinderer, T. E.; Allsopp, M. H.; Oldroyd, B. P.; Zayed, A.			Assessing patterns of admixture and ancestry in Canadian honey bees	INSECTES SOCIAUX			English	Article						Africanized bee; Single nucleotide polymorphisms; Ancestral identification; Breeding; Crowd source; Citizen science	APIS-MELLIFERA L.; MITOCHONDRIAL-DNA SEQUENCE; UNITED-STATES; GENETIC DIVERSITY; PROTECTED POPULATIONS; EVOLUTIONARY HISTORY; EUROPEAN HONEYBEES; APIDAE POPULATIONS; HYMENOPTERA APIDAE; KANGAROO ISLAND	Canadian honey bees, like all honey bees in the New World, originated from centuries of importation of predominately European subspecies, but their precise genetic ancestry has not been investigated. We used a citizen science approach that engaged a diverse group of beekeepers to undertake the largest population genetic study of Canadian honey bees. We used the dataset to characterize the ancestr…	[Harpur, B. A.; Krimus, L.; Maciukiewicz, P.; Sandhu, V.; Sood, K.; Zayed, A.] York Univ, Dept Biol, Toronto, ON M3J 1P3, Canada; [Chapman, N. C.; Lim, J.; Oldroyd, B. P.] Univ Sydney, Sch Biol Sci A12, Behav & Genet Social Insects Lab, Sydney, NSW 2006, Australia; [Rinderer, T. E.] USDA ARS, Honey Bee Breeding Genet & Physiol Res Lab, Baton Rouge, LA 70820 USA; [Allsopp, M. H.] ARC Plant Protect…	Zayed, A (reprint author), York Univ, Dept Biol, 4700 Keele St, Toronto, ON M3J 1P3, Canada.	zayed@yorku.ca			NSERC; Bee Research Fund (Canadian Honey Council); Bee Research Fund (Canadian Association of Professional Apiculturists); Ontario Ministry of Research and Innovation; NSERC Alexander Graham Bell Graduate Scholarship; York University Elia Research Scholarship; Rural Industries Research and Development Corporation [PRJ-007774]	This project was partially supported by a NSERC Discovery grant, a grant from the Bee Research Fund (Canadian Honey Council and the Canadian Association of Professional Apiculturists), and an Early Researcher Award from the Ontario Ministry of Research and Innovation (A.Z.). B.A.H. was supported by an NSERC Alexander Graham Bell Graduate Scholarship and York University Elia Research Scholarship. …	Adam B, 1983, SEARCH BEST STRAINS; AHRA, 2013, RISK ASS IMP HON BEE, V13; WEIR BS, 1984, EVOLUTION, V38, P1358, DOI 10.2307/2408641; Franck P, 2000, APIDOLOGIE, V31, P167, DOI 10.1051/apido:2000114; De la Rua P, 2013, MOL ECOL, V22, P3208, DOI 10.1111/mec.12333; Excoffier L, 2010, MOL ECOL RESOUR, V10, P564, DOI 10.1111/j.1755-0998.2010.02847.x; Harpur BA, 2014, P NATL ACAD SCI USA, V111, P2614, …	75	0	0	20	20	SPRINGER BASEL AG	BASEL	PICASSOPLATZ 4, BASEL, 4052, SWITZERLAND	0020-1812	1420-9098		INSECT SOC	Insect. Soc.	NOV	2015	62	4
J	Prestopnik, NR; Tang, J				Prestopnik, Nathan R.; Tang, Jian			Points, stories, worlds, and diegesis: Comparing player experiences in two citizen science games	COMPUTERS IN HUMAN BEHAVIOR			English	Article						Gamification; Crowdsourcing; Citizen science; Diegesis; Stories; Narrative	SIMULATIONS; PURPOSE	We conducted an experiment to examine how people perceive differences between points-based and story-based gamification approaches. We were interested in how these differences impact peoples' play experiences and perceptions of working on a citizen science task. Our findings show that the story-based game, Forgotten Island, was strongly preferred over the points-based game, Happy Match. Participa…	[Prestopnik, Nathan R.] Ithaca Coll, Dept Comp Sci, Ithaca, NY 14850 USA; [Tang, Jian] Cent Univ Finance & Econ, Sch Informat, Beijing 100081, Peoples R China	Tang, J (reprint author), Cent Univ Finance & Econ, Sch Informat, 39 Xueyuan South Rd, Beijing 100081, Peoples R China.	nprestopnik@ithaca.edu; jiantangruc@gmail.com			US National Science Foundation [SOCS 09-68470]	The authors would like to thank Citizen Sort's principal investigators Kevin Crowston and Jun Wang for their support and guidance, as well as the development team for their efforts on this project: Nathan Brown, Chris Duarte, Susan Furest, Yang Liu, Supriya Mane, Nitin Mule, Gongying Pu, Trupti Rane, Jimit Shah, Sheila Sicilia, Jessica Smith, Dania Souid, Peiyuan Sun, Xueqing Xuan, Shu Zhang, and…	Anderson C, 2008, LONG TAIL WHY FUTURE; Nacke LE, 2010, INTERACT COMPUT, V22, P336, DOI 10.1016/j.intcom.2010.04.005; Brockmyer JH, 2009, J EXP SOC PSYCHOL, V45, P624, DOI 10.1016/j.jesp.2009.02.016; Faul F, 2007, BEHAV RES METHODS, V39, P175, DOI 10.3758/BRM.41.4.1149; WEBSTER J, 1993, COMPUT HUM BEHAV, V9, P411, DOI 10.1016/0747-5632(93)90032-N; Cohn JP, 2008, BIOSCIENCE, V58, P192, DOI 10.1641…	55	0	0	27	27	PERGAMON-ELSEVIER SCIENCE LTD	OXFORD	THE BOULEVARD, LANGFORD LANE, KIDLINGTON, OXFORD OX5 1GB, ENGLAND	0747-5632	1873-7692		COMPUT HUM BEHAV	Comput. Hum. Behav.	NOV	2015	52
J	Genus, A; Theobald, K				Genus, Audley; Theobald, Kate			Roles for university researchers in urban sustainability initiatives: the UK Newcastle Low Carbon Neighbourhoods project	JOURNAL OF CLEANER PRODUCTION			English	Article						Collaboration; Public engagement; Roles; Sustainability; Universities; Urban	3RD WAVE; SCIENCE; CITY; COLLABORATION; PARTNERSHIPS; TRANSITIONS; EXPERIENCE; NETWORK; CITIES	There is considerable debate regarding the contribution to be made by higher education institutions and the researchers they employ in realising environmentally sustainable urban spaces, and the relationship between academic research and lay knowledge. Drawing on previous work, the paper identifies roles that may be played by academic researchers in building sustainable urban locations. Adopting …	[Genus, Audley] Univ Kingston, Sch Business, Kingston Upon Thames KT2 7LB, Surrey, England; [Theobald, Kate] Northumbria Univ, Sustainable Cities Res Inst, Sch Built & Nat Environm, Newcastle Upon Tyne NE1 8ST, Tyne & Wear, England	Genus, A (reprint author), Univ Kingston, Sch Business, Kingston Upon Thames KT2 7LB, Surrey, England.	a.genus@kingston.ac.uk; kate.theobald@northumbria.ac.uk			New Deal for Communities, Your Homes Newcastle; RCUK/Wellcome Trust/Beacon North East [C467A]	The authors wish to thank New Deal for Communities, Your Homes Newcastle and RCUK/Wellcome Trust/Beacon North East (grant number C467A) for funding the work reported in this paper. Any views expressed, errors or omissions are those of the authors.	Frantzeskaki N, 2014, J CLEAN PROD, V65, P406, DOI 10.1016/j.jclepro.2013.09.023; Collins HM, 2002, SOC STUD SCI, V32, P235, DOI 10.1177/0306312702032002003; Jasanoff S, 2003, SOC STUD SCI, V33, P389, DOI 10.1177/03063127030333004; de Jong M, 2013, J CLEAN PROD, V57, P209, DOI 10.1016/j.jclepro.2013.06.036; Jasanoff S, 2003, MINERVA, V41, P223, DOI 10.1023/A:1025557512320; Evans JP, 2011, T I BRI…	36	1	1	21	21	ELSEVIER SCI LTD	OXFORD	THE BOULEVARD, LANGFORD LANE, KIDLINGTON, OXFORD OX5 1GB, OXON, ENGLAND	0959-6526	1879-1786		J CLEAN PROD	J. Clean Prod.	2015-11-01	2015	106
J	Bonnefond, M; Riboli-Sasco, L; Sescousse, G				Bonnefond, Mathilde; Riboli-Sasco, Livio; Sescousse, Guillaume			Repainting citizen science	SCIENCE			English	Editorial Material									[Bonnefond, Mathilde; Sescousse, Guillaume] Radboud Univ Nijmegen, Donders Inst Brain Cognit & Behav, NL-6500 Nijmegen, Netherlands; [Riboli-Sasco, Livio] Atelier Jours Venir, F-64210 Bidart, France	Sescousse, G (reprint author), Radboud Univ Nijmegen, Donders Inst Brain Cognit & Behav, NL-6500 Nijmegen, Netherlands.	g.sescousse@donders.ru.nl					Andujar B., 2015, FRONTIERS YOUNG MIND, V3, P1; [Anonymous], 2015, NATURE, V524, P265	2	0	0	6	6	AMER ASSOC ADVANCEMENT SCIENCE	WASHINGTON	1200 NEW YORK AVE, NW, WASHINGTON, DC 20005 USA	0036-8075	1095-9203		SCIENCE	Science	OCT 30	2015	350	6260
J	Mehdipoor, H; Zurita-Milla, R; Rosemartin, A; Gerst, KL; Weltzin, JF				Mehdipoor, Hamed; Zurita-Milla, Raul; Rosemartin, Alyssa; Gerst, Katharine L.; Weltzin, Jake F.			Developing a Workflow to Identify Inconsistencies in Volunteered Geographic Information: A Phenological Case Study	PLOS ONE			English	Article							CITIZEN SCIENCE; GLOBAL CHANGE; NETWORK; MODEL; LIKELIHOOD; QUALITY; ONSET; PLANT	Recent improvements in online information communication and mobile location-aware technologies have led to the production of large volumes of volunteered geographic information. Widespread, large-scale efforts by volunteers to collect data can inform and drive scientific advances in diverse fields, including ecology and climatology. Traditional workflows to check the quality of such volunteered i…	[Mehdipoor, Hamed; Zurita-Milla, Raul] Univ Twente, Fac GeoInformat Sci & Earth Observat ITC, NL-7500 AE Enschede, Netherlands; [Rosemartin, Alyssa; Gerst, Katharine L.] Univ Arizona, Coll Agr & Life Sci, Sch Nat Resources & Environm, Tucson, AZ USA; [Rosemartin, Alyssa; Gerst, Katharine L.; Weltzin, Jake F.] USA Natl Phenol Network, Natl Coordinating Off, Tucson, AZ USA; [Weltzin, Jake F.] US Ge…	Mehdipoor, H (reprint author), Univ Twente, Fac GeoInformat Sci & Earth Observat ITC, POB 217, NL-7500 AE Enschede, Netherlands.	h.mehdipoor@utwente.nl			Google Faculty Research Award; United States Geological Survey [G09AC00310, G14AC00405]	This research was supported in part by a Google Faculty Research Award to RZM and by Cooperative Agreements G09AC00310 and G14AC00405 from the United States Geological Survey to the University of Arizona. Any use of trade, product, or firm names is for descriptive purposes only and does not imply endorsement by the U.S. Government.	Cleland EE, 2007, TRENDS ECOL EVOL, V22, P357, DOI 10.1016/j.tree.2007.04.003; Parker CJ, 2014, SPRINGERBRIEF GEOGR, P1, DOI 10.1007/978-3-319-03503-1; Ferster CJ, 2013, COMPUT GEOSCI-UK, V51, P339, DOI 10.1016/j.cageo.2012.09.009; Mayer A, 2010, BIOSCIENCE, V60, P172, DOI 10.1525/bio.2010.60.3.3; Yanenko O, 2012, LECT NOTES GEOINF CA, P429, DOI 10.1007/978-3-642-29063-3_23; Cayan DR, 2001, B AM …	63	0	0	3	3	PUBLIC LIBRARY SCIENCE	SAN FRANCISCO	1160 BATTERY STREET, STE 100, SAN FRANCISCO, CA 94111 USA	1932-6203			PLOS ONE	PLoS One	OCT 20	2015	10	10
J	Kelling, S; Johnston, A; Hochachka, WM; Iliff, M; Fink, D; Gerbracht, J; Lagoze, C; La Sorte, FA; Moore, T; Wiggins, A; Wong, WK; Wood, C; Yu, J				Kelling, Steve; Johnston, Alison; Hochachka, Wesley M.; Iliff, Marshall; Fink, Daniel; Gerbracht, Jeff; Lagoze, Carl; La Sorte, Frank A.; Moore, Travis; Wiggins, Andrea; Wong, Weng-Keen; Wood, Chris; Yu, Jun			Can Observation Skills of Citizen Scientists Be Estimated Using Species Accumulation Curves?	PLOS ONE			English	Article							BREEDING BIRD SURVEY; DATA QUALITY; LAND-COVER; SCIENCE; CONSERVATION; MODELS; EBIRD; POPULATION; NETWORK; BIAS	Volunteers are increasingly being recruited into citizen science projects to collect observations for scientific studies. An additional goal of these projects is to engage and educate these volunteers. Thus, there are few barriers to participation resulting in volunteer observers with varying ability to complete the project's tasks. To improve the quality of a citizen science project's outcomes i…	[Kelling, Steve; Hochachka, Wesley M.; Iliff, Marshall; Fink, Daniel; Gerbracht, Jeff; La Sorte, Frank A.; Wood, Chris] Cornell Univ, Cornell Lab Ornithol, Ithaca, NY 14850 USA; [Johnston, Alison] British Trust Ornithol, Thetford, Norfolk, England; [Lagoze, Carl] Univ Michigan, Sch Informat, Ann Arbor, MI 48109 USA; [Moore, Travis; Wong, Weng-Keen; Yu, Jun] Oregon State Univ, Sch Elect Engn & Com…	Kelling, S (reprint author), Cornell Univ, Cornell Lab Ornithol, Ithaca, NY 14850 USA.	stk2@cornell.edu			Leon Levy Foundation; Seaver Institute; Wolf Creek Foundation; National Science Foundation [IIS-1238371, IIS-1209714]	This work was supported by the Leon Levy Foundation (http://leonlevyfoundation.org), Seaver Institute, Wolf Creek Foundation, and the National Science Foundation (IIS-1238371 and IIS-1209714). The funders had no role in study design, data collection and analysis, decision to publish, or preparation of the manuscript.	Farmer RG, 2014, ECOL EVOL, V4, P2563, DOI 10.1002/ece3.1101; Friedl MA, 2010, REMOTE SENS ENVIRON, V114, P168, DOI 10.1016/j.rse.2009.08.016; Crowston K., 2013, Proceedings of the 2013 46th Hawaii International Conference on System Sciences (HICSS 2013), DOI 10.1109/HICSS.2013.413; Fitzpatrick MC, 2009, ECOL APPL, V19, P1673, DOI 10.1890/09-0265.1; Manel S, 2001, J APPL ECOL, V38, P921, DOI 10.1…	40	0	0	10	10	PUBLIC LIBRARY SCIENCE	SAN FRANCISCO	1160 BATTERY STREET, STE 100, SAN FRANCISCO, CA 94111 USA	1932-6203			PLOS ONE	PLoS One	OCT 9	2015	10	10
J	Zhu, AX; Zhang, GM; Wang, W; Xiao, W; Huang, ZP; Dunzhu, GS; Ren, GP; Qin, CZ; Yang, L; Pei, T; Yang, ST				Zhu, A-Xing; Zhang, Guiming; Wang, Wei; Xiao, Wen; Huang, Zhi-Pang; Dunzhu, Ge-Sang; Ren, Guopeng; Qin, Cheng-Zhi; Yang, Lin; Pei, Tao; Yang, Shengtian			A citizen data-based approach to predictive mapping of spatial variation of natural phenomena	INTERNATIONAL JOURNAL OF GEOGRAPHICAL INFORMATION SCIENCE			English	Article						spatial bias; Rhinopithecus bieti; volunteered geographic information (VGI); citizen data; location imprecision	VOLUNTEERED GEOGRAPHIC INFORMATION; HABITAT SUITABILITY MODELS; CONSERVATION PRIORITIES; SPECIES DISTRIBUTIONS; RHINOPITHECUS-BIETI; SAMPLING BIAS; BIODIVERSITY; KNOWLEDGE; MAPS; OPENSTREETMAP	The vast accumulation of environmental data and the rapid development of geospatial visualization and analytical techniques make it possible for scientists to solicit information from local citizens to map spatial variation of geographic phenomena. However, data provided by citizens (referred to as citizen data in this article) suffer two limitations for mapping: bias in spatial coverage and impr…	[Zhu, A-Xing] Nanjing Normal Univ, Key Lab Virtual Geog Environm, Nanjing, Jiangsu, Peoples R China; [Zhu, A-Xing] State Key Lab Cultivat Base Geog Environm Evolut, Nanjing, Jiangsu, Peoples R China; [Zhu, A-Xing; Zhang, Guiming; Dunzhu, Ge-Sang; Qin, Cheng-Zhi; Yang, Lin; Pei, Tao] Chinese Acad Sci, Inst Geog Sci & Nat Resources Res, State Key Lab Resources & Environm Informat Syst, Beijing, Peo…	Zhang, GM (reprint author), Univ Wisconsin, Dept Geog, Madison, WI 53706 USA.	gzhang45@wisc.edu			National Natural Science Foundation of China (NSFC) [41431177, 30960085]; Natural Science Research Program of Jiangsu [14KJA170001]; Priority Academic Program Development of Jiangsu Higher Education Institutions; National Basic Research Program of China [2015CB954102]; 'One Thousand Talent' Program of China; National Science Foundation of China [41422109]	This study was funded by the National Natural Science Foundation of China (NSFC) [Project Numbers: 41431177, 30960085]; Natural Science Research Program of Jiangsu [14KJA170001]; Priority Academic Program Development of Jiangsu Higher Education Institutions; National Basic Research Program of China [Project Number: 2015CB954102]; 'One Thousand Talent' Program of China. Cheng-Zhi Qin thanks the Na…	ALTMAN D, 1994, INT J GEOGR INF SYST, V8, P271, DOI 10.1080/02693799408902000; Guisan A, 2000, ECOL MODEL, V135, P147, DOI 10.1016/S0304-3800(00)00354-9; Kramer-Schadt S, 2013, DIVERS DISTRIB, V19, P1366, DOI 10.1111/ddi.12096; Anadon JD, 2009, CONSERV BIOL, V23, P617, DOI 10.1111/j.1523-1739.2008.01145.x; Kadmon R, 2004, ECOL APPL, V14, P401, DOI 10.1890/02-5364; Dickinson JL, 2012, FRONT ECOL E…	76	0	0	18	18	TAYLOR & FRANCIS LTD	ABINGDON	4 PARK SQUARE, MILTON PARK, ABINGDON OX14 4RN, OXON, ENGLAND	1365-8816	1362-3087		INT J GEOGR INF SCI	Int. J. Geogr. Inf. Sci.	OCT 3	2015	29	10
J	McKinnon, M; Vos, J				McKinnon, Merryn; Vos, Judith			Engagement as a Threshold Concept for Science Education and Science Communication	INTERNATIONAL JOURNAL OF SCIENCE EDUCATION PART B-COMMUNICATION AND PUBLIC ENGAGEMENT			English	Article						Communication; Education; Engagement; Science; Threshold concept	SELF-EFFICACY; SCIENTIFIC LITERACY; PRESERVICE SCIENCE; PUBLIC ENGAGEMENT; TEACHERS; KNOWLEDGE; BELIEFS; CENTERS; CHOICE; REFORM	Science communication and science education have the same overarching aimto engage their audiences in scienceand both disciplines face similar challenges in achieving this aim. Knowing how to effectively engage their audiences' is fundamental to the success of both. Both disciplines have well-developed research fields identifying best practice. However, there seems to be an impediment in putting …	[McKinnon, Merryn] Australian Natl Univ, Australian Natl Ctr Publ Awareness Sci, Canberra, ACT 0200, Australia; [Vos, Judith] Vrije Univ Amsterdam, Fac Earth & Life Sci, Athena Inst, Amsterdam, Netherlands	McKinnon, M (reprint author), Australian Natl Univ, Ctr Publ Awareness Sci, GPO Box 4, Canberra, ACT 0200, Australia.	merryn.mckinnon@anu.edu.au					Skinner E, 2008, J EDUC PSYCHOL, V100, P765, DOI 10.1037/a0012840; Duschl R, 2008, REV RES EDUC, V32, P268, DOI 10.3102/0091732X07309371; HURD PD, 1958, EDUC LEADERSHIP, V16, P13; Kahan DM, 2013, JUDGM DECIS MAK, V8, P407; Falk JH, 2011, J RES SCI TEACH, V48, P1, DOI 10.1002/tea.20394; Vincent BB, 2014, PUBLIC UNDERST SCI, V23, P238, DOI 10.1177/0963662513515371; Ryan RM, 2000, AM PSYCHOL, V55, P…	76	0	0	2	2	ROUTLEDGE JOURNALS, TAYLOR & FRANCIS LTD	ABINGDON	4 PARK SQUARE, MILTON PARK, ABINGDON OX14 4RN, OXFORDSHIRE, ENGLAND	2154-8455	2154-8463		INT J SCI EDUC PART	Int. J. Sci. Educ. Part B-Commun. Public Engagem.	OCT 2	2015	5	4
J	Watts, M				Watts, Mike			Public Understanding of Plant Biology: Voices from the Bottom of the Garden	INTERNATIONAL JOURNAL OF SCIENCE EDUCATION PART B-COMMUNICATION AND PUBLIC ENGAGEMENT			English	Article						Biology; Relevance; Informal learning; Affective domain; Botany; Informal education	CITIZEN SCIENCE	Many household gardeners accumulate considerable knowledge of plant biology through a range of informal learning sources. This knowledge seldom relates to school biology and is driven by interest, keen motivation and what is termed here vital relevance'. A small opportunity sample of 12 gardeners (6 M, 6 F) is interviewed in terms of their knowledge of plant biology and their motives for learning…	Brunel Univ London, Dept Educ, London, England	Watts, M (reprint author), Brunel Univ London, Dept Educ, London, England.	mike.watts@brunel.ac.uk					Allen M., 2014, MISCONCEPTIONS PRIMA; Alsop S., 2000, RES EDUC, V63, P21, DOI DOI 10.7227/RIE.63.3; Havens K, 2013, AM SCI, V101, P378; Dabrowska E, 2005, COGN LINGUIST, V16, P437, DOI 10.1515/cogl.2005.16.3.437; Azevedo FS, 2013, J LEARN SCI, V22, P462, DOI 10.1080/10508406.2012.730082; Poell RF, 2000, MANAGE LEARN, V31, P25, DOI 10.1177/1350507600311004; [Anonymous], 2006, INFO SCI KNOW MANAGE;…	55	0	0	1	1	ROUTLEDGE JOURNALS, TAYLOR & FRANCIS LTD	ABINGDON	4 PARK SQUARE, MILTON PARK, ABINGDON OX14 4RN, OXFORDSHIRE, ENGLAND	2154-8455	2154-8463		INT J SCI EDUC PART	Int. J. Sci. Educ. Part B-Commun. Public Engagem.	OCT 2	2015	5	4
J	van der Woerd, HJ; Wernand, MR				van der Woerd, Hendrik J.; Wernand, Marcel R.			True Colour Classification of Natural Waters with Medium-Spectral Resolution Satellites: SeaWiFS, MODIS, MERIS and OLCI	SENSORS			English	Article						ocean colour remote sensing; spectral bands; hue angle; citizen science; MERIS; MODIS; SeaWiFS; OLCI; colourimetry; water quality	COASTAL WATERS; ALGORITHM; MODEL	The colours from natural waters differ markedly over the globe, depending on the water composition and illumination conditions. The space-borne ocean colour instruments are operational instruments designed to retrieve important water-quality indicators, based on the measurement of water leaving radiance in a limited number (5 to 10) of narrow (approximate to 10 nm) bands. Surprisingly, the analys…	[van der Woerd, Hendrik J.; Wernand, Marcel R.] Royal Netherlands Inst Sea Res Phys Oceanog Marin, NL-1790 AB Den Burg, Netherlands; [van der Woerd, Hendrik J.] Vrije Univ Amsterdam, Inst Environm Studies IVM, NL-1081 HV Amsterdam, Netherlands	van der Woerd, HJ (reprint author), Royal Netherlands Inst Sea Res Phys Oceanog Marin, POB 59, NL-1790 AB Den Burg, Netherlands.	Hans.van.der.Woerd@nioz.nl; Marcel.Wernand@nioz.nl			Citclops European project [FP7-ENV-308469]	The authors would like to thank the members of the CITCLOPS consortium who participated in the Netherlands field trip 2013, as well as the captain and crew of the RV Pelagia (Royal NIOZ) and S. Novoa who collected on board measurements at the North Sea. HJvdW acknowledges A. Dekker for a visitors grant to CSIRO in Canberra, Australia. The research described in this paper is partly supported by th…	[Anonymous], 1932, COMMISSION INT ECLAI; Van der Woerd HJ, 2008, REMOTE SENS ENVIRON, V112, P1795, DOI 10.1016/j.rse.2007.09.001; Wernand MR, 2013, OCEAN SCI, V9, P477, DOI 10.5194/os-9-477-2013; Salama MS, 2011, OPT EXPRESS, V19, P16772, DOI 10.1364/OE.19.016772; Zibordi G, 2010, CAN J REMOTE SENS, V36, P488; Salama MS, 2010, SENSORS-BASEL, V10, P7561, DOI 10.3390/s100807561; Lee ZP, 2007, SENSO…	25	0	0	2	2	MDPI AG	BASEL	POSTFACH, CH-4005 BASEL, SWITZERLAND	1424-8220			SENSORS-BASEL	Sensors	OCT	2015	15	10
J	Dickel, S; Franzen, M				Dickel, Sascha; Franzen, Martina			Digital Inclusion: The Social Implications of Open Science	ZEITSCHRIFT FUR SOZIOLOGIE			German	Article						Sociology of Science; Inclusion: Citizen Science; Web 2.0; Societal Differentiation	PRACTITIONERS PERSPECTIVE; EXPERTISE; ATTENTION; SOCIOLOGY; PLAYERS; BIOLOGY; SYSTEMS; MEDIA	From the perspective of systems theory, science is a prototype of a self-referential functional system that maintains social distance to the public. In functionally differentiated societies, science maintains a strict regime of inclusion, which is closely tied to the professional role of the scientist as someone who produces and acquires knowledge. We suggest that the digital revolution is genera…	[Dickel, Sascha] Tech Univ Munich, Friedrich Schiedel Stiftungslehrstuhl Wissensch S, D-80333 Munich, Germany; [Franzen, Martina] Wissensch Zentrum Berlin Sozialforsch, Forsch Grp Wissensch Polit, D-10785 Berlin, Germany	Dickel, S (reprint author), Tech Univ Munich, Friedrich Schiedel Stiftungslehrstuhl Wissensch S, Arcisstr 21, D-80333 Munich, Germany.	sascha.dickel@tum.de; martina.franzen@wzb.eu					Abels G., 2004, DEMOKRATISCHE TECHNI; Anderson C., 2012, MAKERS NEW IND REVOL; Collins HM, 2002, SOC STUD SCI, V32, P235, DOI 10.1177/0306312702032002003; Bauer MW, 2012, SOCIOL SCI YEARB, V28, P35, DOI 10.1007/978-94-007-2085-5_3; Priem J, 2013, NATURE, V495, P437, DOI 10.1038/495437a; Jeacle I, 2011, ACCOUNT ORG SOC, V36, P293, DOI 10.1016/j.aos.2011.04.002; Khatib F, 2011, NAT STRUCT MOL BIOL,…	97	0	0	1	1	LUCIUS LUCIUS VERLAG MBH	STUTTGART	GEROKSTR 51, D-70184 STUTTGART, GERMANY	0340-1804			Z SOZIOL	Z. Soziol.	OCT	2015	44	5
J	Wilson, JF; Baker, D; Cook, M; Davis, G; Freestone, R; Gardner, D; Grundy, D; Lowe, N; Orridge, S; Young, H				Wilson, John Fawcett; Baker, David; Cook, Mike; Davis, George; Freestone, Roger; Gardner, David; Grundy, Dave; Lowe, Norman; Orridge, Steve; Young, Heather			Climate association with fluctuation in annual abundance of fifty widely distributed moths in England and Wales: a citizen-science study	JOURNAL OF INSECT CONSERVATION			English	Article						Lepidoptera; Rainfall; Sunshine hours; Temperature; Urban gardens	BUTTERFLY NUMBERS; POPULATION TRENDS; GREAT-BRITAIN; BRITISH MOTHS; WINTER MOTH; LEPIDOPTERA; TEMPERATURE; DECLINE; RANGE; OAK	Variation in annual abundance of 50 widespread moths in England and Wales was assessed from the area under the log(10)(moth count + 1) versus time curve (abundance index) for adult moth count data reported between 2003 and 2013 to the UK and Ireland Garden Moth Scheme; a citizen science project. Associations between abundance index and the abundance index of the previous generation, with inward m…	[Wilson, John Fawcett] Min & Nant, Brecon LD3 8HF, Powys, Wales; [Baker, David; Cook, Mike; Davis, George; Freestone, Roger; Gardner, David; Grundy, Dave; Lowe, Norman; Orridge, Steve; Young, Heather] United Kingdom & Ireland Garden Moth Scheme GMS, Birmingham, W Midlands, England	Wilson, JF (reprint author), Min & Nant, Brecon LD3 8HF, Powys, Wales.	wilson.brecon@btinternet.com					Alexander L.V., 2001, ATMOS SCI LETT, V1, P142, DOI DOI 10.1006/ASLE.2001.0025; Fox R, 2013, INSECT CONSERV DIVER, V6, P5, DOI 10.1111/j.1752-4598.2012.00186.x; WallisDeVries MF, 2011, OECOLOGIA, V167, P559, DOI 10.1007/s00442-011-2007-z; Perry M, 2005, INT J CLIMATOL, V25, P1023, DOI 10.1002/joc.1160; Kristin A, 1997, BIOLOGIA, V52, P319; Calkins CO, 1998, J AGR ENTOMOL, V15, P327; Thomas JA, 20…	60	0	0	0	0	SPRINGER	DORDRECHT	VAN GODEWIJCKSTRAAT 30, 3311 GZ DORDRECHT, NETHERLANDS	1366-638X	1572-9753		J INSECT CONSERV	J. Insect Conserv.	OCT	2015	19	5
J	Wang, YW; Kaplan, N; Newman, G; Scarpino, R				Wang, Yiwei; Kaplan, Nicole; Newman, Greg; Scarpino, Russell			CitSci.org: A New Model for Managing, Documenting, and Sharing Citizen Science Data	PLOS BIOLOGY			English	Editorial Material							ECOLOGICAL RESEARCH	Citizen science projects have the potential to advance science by increasing the volume and variety of data, as well as innovation. Yet this potential has not been fully realized, in part because citizen science data are typically not widely shared and reused. To address this and related challenges, we built CitSci.org (see www.citsci.org), a customizable platform that allows users to collect and…	[Wang, Yiwei] Univ New Mexico, DataONE, Albuquerque, NM 87131 USA; [Kaplan, Nicole; Newman, Greg; Scarpino, Russell] Colorado State Univ, Nat Resource Ecol Lab, Ft Collins, CO 80523 USA	Wang, YW (reprint author), Univ New Mexico, DataONE, Albuquerque, NM 87131 USA.	y.wang82@gmail.com					Wiser SK, 2011, J VEG SCI, V22, P598, DOI 10.1111/j.1654-1103.2010.01245.x; Michener WK, 1997, ECOL APPL, V7, P330, DOI 10.2307/2269427; Hunter J, 2013, CONCURR COMP-PRACT E, V25, P454, DOI 10.1002/cpe.2923; Dickinson JL, 2012, FRONT ECOL ENVIRON, V10, P291, DOI 10.1890/110236; Ellison AM, 2010, ECOLOGY, V91, P2536, DOI 10.1890/09-0032.1; Theobald EJ, 2015, BIOL CONSERV, V181, P236, DOI 10.1016/j…	14	0	0	1	1	PUBLIC LIBRARY SCIENCE	SAN FRANCISCO	1160 BATTERY STREET, STE 100, SAN FRANCISCO, CA 94111 USA	1545-7885			PLOS BIOL	PLoS. Biol.	OCT	2015	13	10
J	Culin, J; Finney, M				Culin, Joseph; Finney, Michael			Incorporating Citizen Science into Monitoring Hemlock Following Predator Releases for Adelges tsugae (Hemiptera: Adelgidae) Management	JOURNAL OF ENTOMOLOGICAL SCIENCE			English	Article						Adelges tsugae; citizen science; forest pest monitoring		A photograph-based monitoring system was developed to involve citizen scientists in monitoring sites in western North Carolina and northern Georgia where the predators Sasajiscymnus tsugae (Sasaji & McClure) and Laricobius nigrinus Fender had been released as part of the U.S. Forest Service's biological control program for Adelges tsugae Annand (hemlock woolly adelgid). The study was divided into…	[Culin, Joseph; Finney, Michael] Clemson Univ, Dept Agr & Environm Sci, Clemson, SC 29634 USA	Culin, J (reprint author), Clemson Univ, Dept Agr & Environm Sci, Clemson, SC 29634 USA.	jculin@clemson.edu			National Forest Foundation, Centennial Year Challenge Program [5CY-08-05]; Jackson-Macon Conservation Alliance; Clemson University's College of Agriculture, Forestry, and Life Sciences; Clemson University Experiment Station; Chattooga Conservancy	We thank the members of the Jackson-Macon Conservation Alliance, Atlanta Audubon Society, and Lumpkin Coalition who participated in this study. Without their efforts we could not have gathered these data. James Wentworth (Central Zone Biologist, U.S. Forest Service) provided valuable assistance in selecting monitoring sites for the second phase. We thank LayLa Burgess for assisting in volunteer t…	Adams M.S., 2002, P HEML WOOLL AD E US, P100; MCCLURE MS, 1991, ENVIRON ENTOMOL, V20, P258; Faulkenberry M, 2009, SOUTHEAST NAT, V8, P129, DOI 10.1656/058.008.0112; Evans AM, 2007, BIOL INVASIONS, V9, P369, DOI 10.1007/s10530-006-9039-z; Conway HE, 2005, CAN ENTOMOL, V137, P622; [Anonymous], 2003, CONS PLANN M BLUE WA; Faulkenberry MS, 2012, J ENTOMOL SCI, V47, P369; Burgess L, 2013, POSTHEMLOCK …	25	0	0	2	2	GEORGIA ENTOMOLOGICAL SOC INC	TIFTON	PO BOX 748 DEPT ENTOMOLOGY COASTAL PLAIN EXPT STATION, TIFTON, GA 31793-0748 USA	0749-8004			J ENTOMOL SCI	J. Entomol. Sci.	OCT	2015	50	4
J	Jefferson, R; McKinley, E; Capstick, S; Fletcher, S; Griffin, H; Milanese, M				Jefferson, Rebecca; McKinley, Emma; Capstick, Stuart; Fletcher, Stephen; Griffin, Holly; Milanese, Martina			Understanding audiences: Making public perceptions research matter to marine conservation	OCEAN & COASTAL MANAGEMENT			English	Article						Ocean optimism; Public engagement; Framework; Interdisciplinary; Research priorities	PEOPLE MIGHT CARE; SCIENCE COMMUNICATION; BIODIVERSITY CONSERVATION; PROTECTED AREAS; OCEAN LITERACY; CLIMATE-CHANGE; VALUES; RISK; UK; ACIDIFICATION	There is increasing awareness of the need to meaningfully engage society in efforts to tackle marine conservation challenges. Public perceptions research (PPR) in a marine conservation context provides tools to see the sea through the multiple lenses with which society interprets both the marine environment and marine conservation efforts. Traditionally, PPR is predominantly a social science whic…	[Jefferson, Rebecca] RSPB, RSPB Ctr Conservat Sci, Sandy SG19 2DL, Beds, England; [McKinley, Emma] Univ Chichester, Sch Enterprise Management & Leadership, Bognor Regis PO22 8BN, England; [Capstick, Stuart] Cardiff Univ, Sch Psychol, Cardiff CF10 3AT, S Glam, Wales; [Fletcher, Stephen] Univ Plymouth, Ctr Marine & Coastal Policy Res, Plymouth PL4 8AA, Devon, England; [Griffin, Holly] UCL, Dept Geo…	Jefferson, R (reprint author), RSPB, RSPB Ctr Conservat Sci, Sandy SG19 2DL, Beds, England.	rebecca.jefferson@rspb.org.uk; e.mckinley@chi.ac.uk; capsticksb@cardiff.ac.uk; steve.fletcher@plymouth.ac.uk; m.milanese@studioassociatogaia.com					4SEAS, 2010, 4SEAS SYN SCI SOC SH; Vincent ACJ, 2011, AQUAT CONSERV, V21, P495, DOI 10.1002/aqc.1226; Fox HE, 2006, CONSERV BIOL, V20, P1817, DOI 10.1111/j.1523-1739.2006.00598.x; Campbell LM, 2006, ENVIRON MANAGE, V38, P84, DOI 10.1007/s00267-005-0188-0; Hunt CV, 2013, OCEAN COAST MANAGE, V78, P35, DOI 10.1016/j.ocecoaman.2013.03.004; Savadori L, 2004, RISK ANAL, V24, P1289, DOI 10.1111/j.0272-4…	74	1	1	1	1	ELSEVIER SCI LTD	OXFORD	THE BOULEVARD, LANGFORD LANE, KIDLINGTON, OXFORD OX5 1GB, OXON, ENGLAND	0964-5691	1873-524X		OCEAN COAST MANAGE	Ocean Coastal Manage.	OCT	2015	115
J	Cigliano, JA; Meyer, R; Ballard, HL; Freitag, A; Phillips, TB; Wasser, A				Cigliano, John A.; Meyer, Ryan; Ballard, Heidi L.; Freitag, Amy; Phillips, Tina B.; Wasser, Ann			Making marine and coastal citizen science matter	OCEAN & COASTAL MANAGEMENT			English	Article						Citizen science; Marine conservation; Coastal conservation; Toolldt	PUBLIC-PARTICIPATION; ECOLOGICAL RESEARCH; CONSERVATION; COMMUNITY; TOOL; MANAGEMENT; KNOWLEDGE; ATTITUDES; BEHAVIOR; SCIENTISTS	Against the backdrop of a dramatic increase in citizen science activity worldwide, we convened a combined symposium and focus group at the 2014 International Marine Conservation Congress to consider the challenges and opportunities for mobilizing citizen science in the marine and coastal environment. Highlighting the diversity of existing models and approaches to citizen science, participants foc…	[Cigliano, John A.] Cedar Crest Muhlenberg Coll, Dept Biol Sci, Allentown, PA 18104 USA; [Meyer, Ryan] Calif Ocean Sci Trust, Palo Alto, CA USA; [Ballard, Heidi L.] Univ Calif Davis, Sch Educ, Davis, CA 95616 USA; [Freitag, Amy] Virginia Sea Grant, Blacksburg, VA USA; [Phillips, Tina B.] Cornell Lab Ornithol, Ithaca, NY 14850 USA; [Wasser, Ann] Pacific Grove Museum Nat Hist, Pacific Grove, CA USA	Cigliano, JA (reprint author), Cedar Crest Muhlenberg Coll, Dept Biol Sci, 100 Coll Dr, Allentown, PA 18104 USA.	jaciglia@cedarcrest.edu			Earthwatch International	We would like to the participants of the symposium and focus groups. Their dedication to and knowledge of marine and coastal conservation and to citizen science made this paper possible. JAC would like to thank Earthwatch International for funding and the amazing Earthwatch citizen scientists for their help. We would also like to acknowledge the two anonymous reviewers for the helpful comments, w…	Aceves-Bueno E., 2015, ECOSYSTEMS; Andriamalala G., 2013, J CONSERV EVID, V10, P37; Delaney DG, 2008, BIOL INVASIONS, V10, P117, DOI 10.1007/s10530-007-9114-0; Nisbet MC, 2009, SCI COMMUN, V30, P328, DOI 10.1177/1075547008328797; Cho L, 2005, OCEAN COAST MANAGE, V48, P932, DOI 10.1016/j.ocecoaman.2005.03.007; Gallo T, 2011, BIOSCIENCE, V61, P459, DOI 10.1525/bio.2011.61.6.8; Bouillion LM, 2001, J…	91	1	1	10	10	ELSEVIER SCI LTD	OXFORD	THE BOULEVARD, LANGFORD LANE, KIDLINGTON, OXFORD OX5 1GB, OXON, ENGLAND	0964-5691	1873-524X		OCEAN COAST MANAGE	Ocean Coastal Manage.	OCT	2015	115
J	Liu, CH; Fan, J; Hui, P; Wu, J; Leung, KK				Liu, Chi Harold; Fan, Jun; Hui, Pan; Wu, Jie; Leung, Kin K.			Toward QoI and Energy Efficiency in Participatory Crowdsourcing	IEEE TRANSACTIONS ON VEHICULAR TECHNOLOGY			English	Article						Energy efficiency; Gur Game; participatory crowdsourcing; quality of information (QoI)	NETWORKS; AUCTION; STATE	Today's smartphones are also fundamentally transforming the traditional understanding of "crowdsourcing" to an emerging type of participatory task-oriented application. It aims to support the so-called "Citizen Science efforts" for knowledge discovery to understand human behavior and measure/evaluate their opinions. To facilitate these scenarios, in this paper, we propose a novel efficient networ…	[Liu, Chi Harold; Fan, Jun] Beijing Inst Technol, Sch Software, Beijing 100081, Peoples R China; [Hui, Pan] Hong Kong Univ Sci & Technol, Kowloon, Hong Kong, Peoples R China; [Hui, Pan] Deutsch Telekom AG, D-10587 Berlin, Germany; [Wu, Jie] Temple Univ, Philadelphia, PA 19122 USA; [Leung, Kin K.] Univ London Imperial Coll Sci Technol & Med, Dept Elect & Elect Engn, London SW7 2AZ, England; [Leung…	Liu, CH (reprint author), Beijing Inst Technol, Sch Software, Beijing 100081, Peoples R China.	chiliu@bit.edu.cn; jfan@bit.edu.cn; panhui@cse.ust.hk; jiewu@temple.edu; kin.leung@imperial.ac.uk			National Natural Science Foundation of China [61300179]	This work was supported by the National Natural Science Foundation of China under Grant 61300179. Early results were reported at IEEE SECON' 11, Salt Lake City, UT, USA. The review of this paper was coordinated by Dr. S. Zhong.	MCAFEE RP, 1992, J ECON THEORY, V56, P434, DOI 10.1016/0022-0531(92)90091-U; Gaonkar S, 2008, MOBISYS'08: PROCEEDINGS OF THE SIXTH INTERNATIONAL CONFERENCE ON MOBILE SYSTEMS, APPLICATIONS, AND SERVICES, P174; Tung B, 1996, IEEE T PARALL DISTR, V7, P439, DOI 10.1109/71.494637; GROVES T, 1973, ECONOMETRICA, V41, P617, DOI 10.2307/1914085; Bonney R, 2009, BIOSCIENCE, V59, P977, DOI 10.1525/bio.2009.…	37	0	0	3	3	IEEE-INST ELECTRICAL ELECTRONICS ENGINEERS INC	PISCATAWAY	445 HOES LANE, PISCATAWAY, NJ 08855-4141 USA	0018-9545	1939-9359		IEEE T VEH TECHNOL	IEEE Trans. Veh. Technol.	OCT	2015	64	10
J	Lin, W				Lin, Wen			The hearing, the mapping, and the Web: Investigating emerging online sound mapping practices	LANDSCAPE AND URBAN PLANNING			English	Article						Sound maps; Volunteered geographic information (VGI); Visual practices; China	GEOGRAPHIC INFORMATION-SCIENCE; LANDSCAPE; PARTICIPATION; TECHNOLOGIES; SPACES; WORLD	In recent years, we have seen the emergence of sound mapping, through which users can share their recordings of sounds via online mapping platforms. These practices are enabled by an array of spatial and digital technologies that also facilitate the growth of the so-called volunteered geographic information (VGI) regarding contributions from users without training in conventional GIS or cartograp…	Newcastle Univ, Sch Geog Polit & Sociol, Newcastle Upon Tyne NE1 7RU, Tyne & Wear, England	Lin, W (reprint author), Newcastle Univ, Sch Geog Polit & Sociol, Room 3-73a,Level 3 Daysh Bldg,Claremont Rd, Newcastle Upon Tyne NE1 7RU, Tyne & Wear, England.	wen.lin@ncl.ac.uk					Crutcher M, 2009, GEOFORUM, V40, P523, DOI 10.1016/j.geoforum.2009.01.003; Revill G, 2013, SOCIOL REV, V61, P51, DOI 10.1111/1467-954X.12053; Revill G, 2014, T I BRIT GEOGR, V39, P333, DOI 10.1111/tran.12034; Elwood S, 2013, T I BRIT GEOGR, V38, P544, DOI 10.1111/j.1475-5661.2012.00543.x; Mason J, 2009, QUAL RES, V9, P587, DOI 10.1177/1468794109343628; Degen M, 2008, ENVIRON PLANN A, V40, P1901, …	57	0	0	9	9	ELSEVIER SCIENCE BV	AMSTERDAM	PO BOX 211, 1000 AE AMSTERDAM, NETHERLANDS	0169-2046	1872-6062		LANDSCAPE URBAN PLAN	Landsc. Urban Plan.	OCT	2015	142				SI
J	Shelton, T; Poorthuis, A; Zook, M				Shelton, Taylor; Poorthuis, Ate; Zook, Matthew			Social media and the city: Rethinking urban socio-spatial inequality using user-generated geographic information	LANDSCAPE AND URBAN PLANNING			English	Article						Big data; Critical GIS; Mixed methods; Socio-spatial theory; Urban planning	BIG DATA; UNEVEN GEOGRAPHIES; SPACE; NEOGEOGRAPHY; TERRITORIAL; CYBERSCAPES; DIMENSIONS; PATTERNS; MOBILITY; CITIES	Big data is increasingly seen as a way of providing a more 'scientific' approach to the understanding and management of cities. But most geographic analyses of geotagged social media data have failed to mobilize a sufficiently complex understanding of socio-spatial relations. By combining the conceptual approach of relational socio-spatial theory with the methods of critical GIScience, this paper…	[Shelton, Taylor] Clark Univ, Grad Sch Geog, Worcester, MA 01610 USA; [Poorthuis, Ate; Zook, Matthew] Univ Kentucky, Dept Geog, Lexington, KY 40506 USA	Shelton, T (reprint author), Clark Univ, Grad Sch Geog, 950 Main St, Worcester, MA 01610 USA.	jshelton@clarku.edu					Amin A., 2007, CITY, V11, P100, DOI 10.1080/13604810701200961; Amin A., 2002, CITIES REIMAGINING U; Amin A., 2004, GEOGR ANN B, V86, P33, DOI DOI 10.1111/J.0435-3684.2004.00152.X; Anderson C., 2008, WIRED MAGAZINE, V15; Crutcher M, 2009, GEOFORUM, V40, P523, DOI 10.1016/j.geoforum.2009.01.003; Li Y, 2013, PHOTOGRAMM ENG REM S, V79, P769; Kwan MP, 2013, ANN ASSOC AM GEOGR, V103, P1078, DOI 10.1080…	87	0	0	18	18	ELSEVIER SCIENCE BV	AMSTERDAM	PO BOX 211, 1000 AE AMSTERDAM, NETHERLANDS	0169-2046	1872-6062		LANDSCAPE URBAN PLAN	Landsc. Urban Plan.	OCT	2015	142				SI
J	Cope, M				Cope, Meghan			Commentary: Geographies of digital lives: Trajectories in the production of knowledge with user-generated content	LANDSCAPE AND URBAN PLANNING			English	Editorial Material						User-generated content; Volunteered geographic information (VGI); Production of knowledge; Social media		Whether it is "volunteered" or not, user-generated content is the fastest-growing source of spatially referenced data as people around the world use various portals to comment on everyday life, share photos and sounds, and use location-aware devices to inform and influence everyday life. Planners and geographers are well-situated to employ such data in their efforts to broaden public participatio…	Univ Vermont, Dept Geog, Burlington, VT 05405 USA	Cope, M (reprint author), Univ Vermont, Dept Geog, Burlington, VT 05405 USA.	mcope@uvm.edu					Crampton J. W., 2010, MAPPING CRITICAL INT; Gilbert M., 2011, INFORM COMMUNICATION; Goodchild M, 2007, GEOJOURNAL, V69, P211, DOI DOI 10.1007/S10708-007-9111-Y; Massey D., 1991, MARXISM TODAY, V35, P24; Paterson M, 2009, PROG HUM GEOG, V33, P766, DOI 10.1177/0309132509103155; Stephens M., 2013, GEOJOURNAL, V78, P981, DOI [10.1007/s10708-013-9492-z, DOI 10.1007/S10708-013-9492-Z]	6	0	0	4	4	ELSEVIER SCIENCE BV	AMSTERDAM	PO BOX 211, 1000 AE AMSTERDAM, NETHERLANDS	0169-2046	1872-6062		LANDSCAPE URBAN PLAN	Landsc. Urban Plan.	OCT	2015	142				SI
J	Wilson, MW				Wilson, Matthew W.			On the criticality of mapping practices: Geodesign as critical GIS?	LANDSCAPE AND URBAN PLANNING			English	Article						Geodesign; Critical GIS; Mapping; Design; Geography; Planning	LOCATION-AWARE FUTURE; INFORMATION-SCIENCE; SPATIAL POLITICS; GEOGRAPHIES; TOOL; HARVARD; GEOWEB	In recent years, geospatial design (or geodesign) has emerged as an area of technological development, GIScience research, and design practice. With Esri leading the branding of this emerging area, geospatial technology developers, design consultancies, and academic units are recognizing the affordances of applying geovisualization and geoanalytical techniques to more conventional practices withi…	[Wilson, Matthew W.] Harvard Univ, Grad Sch Design, Cambridge, MA 02138 USA; [Wilson, Matthew W.] Harvard Univ, Ctr Geog Anal, Cambridge, MA 02138 USA; [Wilson, Matthew W.] Univ Kentucky, Dept Geog, Lexington, KY 40506 USA	Wilson, MW (reprint author), Harvard Univ, Grad Sch Design, 48 Quincy St, Cambridge, MA 02138 USA.	matthew_wilson@harvard.edu					Aitken S., 1995, CARTOGR GEOGR INF SC, V22, P17, DOI 10.1559/152304095782540519; Bryan J, 2010, POLIT GEOGR, V29, P414, DOI 10.1016/j.polgeo.2010.09.001; McHaffie P, 2000, INT J GEOGR INF SCI, V14, P755, DOI 10.1080/136588100750022778; [Anonymous], 2012, FORBES; Leszczynski A, 2012, PROG HUM GEOG, V36, P72, DOI 10.1177/0309132511411231; O' Sullivan D, 2006, PROG HUM GEOG, V30, P783, DOI 10.1177/0…	73	0	0	13	13	ELSEVIER SCIENCE BV	AMSTERDAM	PO BOX 211, 1000 AE AMSTERDAM, NETHERLANDS	0169-2046	1872-6062		LANDSCAPE URBAN PLAN	Landsc. Urban Plan.	OCT	2015	142				SI
J	Adams, AJ; Cooke, SJ				Adams, Aaron J.; Cooke, Steven J.			Advancing the science and management of flats fisheries for bonefish, tarpon, and permit	ENVIRONMENTAL BIOLOGY OF FISHES			English	Article						Recreational fishing; Conservation; Fish habitat; Catch and release; Citizen science	MEGALOPS-ATLANTICUS; ALBULA-VULPES; FLORIDA-KEYS; RECREATIONAL FISHERIES; ALBULIFORMES ALBULIDAE; JUVENILE TARPON; BAHAMIAN WATERS; ANDROS ISLAND; GROWTH; AGE	The fish of the sub-tropical and tropical flats including bonefish (Albula spp.), Atlantic tarpon (Megalops atlanticus), and permit (Trachinotus falcatus), capture the imagination of specialized coastal marine recreational anglers. Until recently, little was known about the biology and natural history of these iconic species. Flats ecosystems are under threat from coastal development and environm…	[Adams, Aaron J.] Florida Inst Technol, Bonefish & Tarpon Trust, Vero Beach Marine Lab, Vero Beach, FL 32963 USA; [Adams, Aaron J.] Florida Inst Technol, Dept Biol Sci, Vero Beach Marine Lab, Vero Beach, FL 32963 USA; [Cooke, Steven J.] Carleton Univ, Dept Biol, Ottawa, ON K1S 5B6, Canada	Adams, AJ (reprint author), Florida Inst Technol, Bonefish & Tarpon Trust, Vero Beach Marine Lab, 805 46th Pl East, Vero Beach, FL 32963 USA.	aaronadams@fit.edu			Costa del Mar. Sunglasses; Carrabas Italian Grill; Hell's Bay Boatworks; Bass Pro Shops; International Game Fish Association; Belcampo Belize; Nautilus Reels; Orvis; Coldpruf; Deep Water Cay Club; Hardy; Enrico Puglisi; Bote Boards; Sweetwater Brewery; Tito's Vodka; Wildlife Foundation of Florida; Yellow Dog Flyfishing Adventures; South Holston River Lodge; Frontiers Travel; Fay Ranches	The 2014 Bonefish & Tarpon Symposium was made possible by sponsors, the contributions of many volunteers, and the participation of scientists, guides, anglers, and resource managers. Thank you to the symposium committee Jeff Storm Harkavy, mike Duckworth, Bill Stroh, Luis Menocal, Alex Lovett-Woodsum, Bill Klyn, Andy Mill, Steve Stanley. Thank you to sponsors Costa del Mar. Sunglasses, Carrabas I…	Adams A. J., 2013, FISH FISH, V15, P280; Adams AJ, 2008, BIOL MANAGEMENT WORL; Ahrens R, 2015, ENVIRON BIOL FISH, V98, P2251, DOI 10.1007/s10641-015-0426-0; SHAKLEE JB, 1981, SYST ZOOL, V30, P125, DOI 10.2307/2992412; Graham RT, 2005, FISH B-NOAA, V103, P426; Danylchuk AJ, 2011, CONSERV BIOL, V25, P458, DOI 10.1111/j.1523-1739.2010.01631.x; Cowx IG, 2010, J FISH BIOL, V76, P2194, DOI 10.1111/j.10…	82	0	0	14	14	SPRINGER	NEW YORK	233 SPRING ST, NEW YORK, NY 10013 USA	0378-1909	1573-5133		ENVIRON BIOL FISH	Environ. Biol. Fishes	OCT	2015	98	11			SI
J	Black, BD; Adams, AJ; Bergh, C				Black, Brooke D.; Adams, Aaron J.; Bergh, Chris			Mapping of stakeholder activities and habitats to inform conservation planning for a national marine sanctuary	ENVIRONMENTAL BIOLOGY OF FISHES			English	Article						Catch and release; GIS; Stakeholder; Recreational fishing; Management	ECOSYSTEM SERVICES; PROTECTED AREAS; FISHING EFFORT; MANAGEMENT; FISHERIES; BEHAVIOR; SEA; ENVIRONMENTS; GULF	The Florida Keys is recognized as the birth place of flats fishing, but the flats fishery has historically been underappreciated by resource managers because it is a catch and release fishery. However, the fishery is increasingly threatened by habitat degradation and user conflicts. Ongoing regulatory revisions in the Florida Keys prompted us to work with flats fishing guides to document spatial …	[Black, Brooke D.] Bonefish & Tarpon Trust, Tavernier, FL 33070 USA; [Adams, Aaron J.] Bonefish & Tarpon Trust, Vero Beach, FL 32963 USA; [Bergh, Chris] Nature Conservancy, Big Pine Key, FL 33043 USA	Black, BD (reprint author), Bonefish & Tarpon Trust, POB 1327, Tavernier, FL 33070 USA.	brooke@bonefishtarpontrust.org			Nature Conservancy; Florida KeysKeeper; Bonefish Tarpon Trust	This project was funded in part through grants provided by The Nature Conservancy, Florida KeysKeeper, and Bonefish & Tarpon Trust. We are most grateful to the local fishing guides for placing considerable trust in our methods and this work would not have been possible without their knowledge and input. Capt. Duane Baker and Capt. John O'Hearn were instrumental in organizing meetings with their r…	Aceves-Bueno E, 2015, ECOSYSTEMS, V18, P493, DOI 10.1007/s10021-015-9842-4; Adams Aaron J., 2004, Gulf and Caribbean Research, V16, P129; Adams AJ, 2015, P 2 INT MANGR FISH H; Agostini VN, 2010, MARINE ZONING SAINT; Pomeroy R, 2008, MAR POLICY, V32, P816, DOI 10.1016/j.marpol.2008.03.017; Crowder LB, 2008, ANNU REV ECOL EVOL S, V39, P259, DOI 10.1146/annurev.ecolsys.39.110707.173406; Kopperoinen …	37	1	1	7	7	SPRINGER	NEW YORK	233 SPRING ST, NEW YORK, NY 10013 USA	0378-1909	1573-5133		ENVIRON BIOL FISH	Environ. Biol. Fishes	OCT	2015	98	11			SI
J	Guindon, K; Neidig, C; Tringali, M; Gray, S; King, T; Gardinal, C; Kurth, B				Guindon, Kathy; Neidig, Carole; Tringali, Mike; Gray, Samantha; King, Thomas; Gardinal, Chris; Kurth, Ben			An overview of the tarpon genetic recapture study in Florida - a citizen science success story	ENVIRONMENTAL BIOLOGY OF FISHES			English	Article						Tarpon; Genetics; Mark-recapture; Citizen science; Megalops atlanticus	MEGALOPS-ATLANTICUS; CONSERVATION; MANAGEMENT; PROBABILITY; GROWTH	The tarpon Genetic Recapture Study started in an effort to determine how often a tarpon is caught and released in Florida's growing and lucrative fishery by using DNA fingerprinting techniques as a tool to identify and track individual tarpon. Previous research on central and southwest Gulf of Mexico fisheries showed that most tarpon can survive short-term catch-and-release fishing practices. How…	[Guindon, Kathy; Tringali, Mike; Gray, Samantha; Gardinal, Chris; Kurth, Ben] Fish & Wildlife Res Inst, Florida Fish & Wildlife Conservat Commiss, St Petersburg, FL 33701 USA; [Neidig, Carole; King, Thomas] Mote Marine Lab, Directorate Fisheries & Aquaculture, Sarasota, FL 34236 USA	Guindon, K (reprint author), Fish & Wildlife Res Inst, Florida Fish & Wildlife Conservat Commiss, 100 8th Ave SE, St Petersburg, FL 33701 USA.	Kathy.Guindon@MyFWC.com			Federal Aid in Sport Fish Restoration Act [F-59, F-69]; State of Florida's tarpon tag program; Islamorada Fishing and Conservation Trust; Wildlife Foundation of Florida; MML	This study was made possible by funding through Grant F-59 and Grant F-69 from the Federal Aid in Sport Fish Restoration Act, the State of Florida's tarpon tag program, and foundation grant awards from the Islamorada Fishing and Conservation Trust and Wildlife Foundation of Florida. The statements, findings, conclusions, and recommendations are those of the authors and do not necessarily reflect …	Adams A. J., 2013, FISH FISH, V15, P280; Tringali MD, 2006, FISH RES, V77, P159, DOI 10.1016/j.fishres.2005.10.007; Richard A, 2013, MOL ECOL, V22, P187, DOI 10.1111/mec.12102; Fiske ST, 2014, P NATL ACAD SCI USA, V111, P13593, DOI 10.1073/pnas.1317505111; Bonney R, 2009, BIOSCIENCE, V59, P977, DOI 10.1525/bio.2009.59.11.9; Barbieri Luiz R., 2008, V9, P399; Granek EF, 2008, CONSERV BIOL, V22, P11…	27	1	1	4	4	SPRINGER	NEW YORK	233 SPRING ST, NEW YORK, NY 10013 USA	0378-1909	1573-5133		ENVIRON BIOL FISH	Environ. Biol. Fishes	OCT	2015	98	11			SI
J	Weng, YC				Weng, Yen-Chu			Contrasting visions of science in ecological restoration: Expert-lay dynamics between professional practitioners and volunteers	GEOFORUM			English	Article						Ecological restoration; Public participation; Volunteers; Citizen science; Expert-lay dynamics; Political ecology	CITIZEN SCIENCE; RIVER RESTORATION; ENVIRONMENTAL KNOWLEDGE; POLITICAL ECOLOGY; BOUNDARY-WORK; PARTICIPATION; CONSERVATION; COMMUNITY; MANAGEMENT; OPPORTUNITIES	Ecological restoration as a popular form of volunteer participation has been praised as an example of democratic natural resource management. However, the involvement of volunteers in projects guided by professionals does not necessarily ensure democratic knowledge exchange and production. Drawing insights from citizen science and political ecology, this paper investigates the role of science in …	[Weng, Yen-Chu] Univ Wisconsin, Dept Geog, Madison, WI 53706 USA	Weng, YC (reprint author), Univ Washington, Program Environm, 3737 Brooklyn Ave NE, Seattle, WA 98195 USA.	yweng@uw.edu			National Science Foundation (United States) Doctoral Dissertation Research Improvement Award (DDRI) [0802627]; Whitbeck Graduate Dissertator Award from the University of Wisconsin-Madison	This research was undertaken as part of a PhD project partially funded by the National Science Foundation (United States) Doctoral Dissertation Research Improvement Award (DDRI # 0802627) and Whitbeck Graduate Dissertator Award from the University of Wisconsin-Madison. The author deeply appreciates all the research participants for contributing their experience to the project and is grateful to M…	Allen BL, 2003, URBAN IND ENVIRON, P1; Hobbs SJ, 2012, J NAT CONSERV, V20, P364, DOI 10.1016/j.jnc.2012.08.002; Sharpe A, 2006, ENVIRON MONIT ASSESS, V113, P395, DOI 10.1007/s10661-005-9091-7; Brandon A, 2003, NAT AREA J, V23, P254; Agrawal A, 1999, WORLD DEV, V27, P629, DOI 10.1016/S0305-750X(98)00161-2; Trigger D, 2008, GEOFORUM, V39, P1273, DOI 10.1016/j.geoforum.2007.05.010; Kohlhagen T, 2013…	128	0	0	11	11	PERGAMON-ELSEVIER SCIENCE LTD	OXFORD	THE BOULEVARD, LANGFORD LANE, KIDLINGTON, OXFORD OX5 1GB, ENGLAND	0016-7185	1872-9398		GEOFORUM	Geoforum	OCT	2015	65
J	Lambertson, KF; Damiani, SA; Might, M; Shelton, R; Terry, SF				Lambertson, Katherine F.; Damiani, Stephen A.; Might, Matthew; Shelton, Robert; Terry, Sharon F.			Participant-Driven Matchmaking in the Genomic Era	HUMAN MUTATION			English	Article						patient-led matchmaking; whole-genome sequencing; whole-exome sequencing; rare-disease diagnostics; citizen science; registries; Matchmaker Exchange	SPINAL-CORD INVOLVEMENT; INTELLECTUAL DISABILITY; CONSENT MODELS; RARE DISEASES; BRAIN-STEM; MUTATIONS; LEUKOENCEPHALOPATHY; LEUKODYSTROPHIES; PREFERENCES; DISORDER	Whole-genome and whole-exome sequencing are increasingly useful diagnostic tools for novel monogenic conditions. In order to confirm diagnoses made using these technologies, genomic matchmaking-the matching of cases with similar phenotypic and/or genotypic profiles, to narrow the number of candidate genes or ascertain a condition's etiology with greater certainty-is essential. Yet, due to current…	[Lambertson, Katherine F.; Terry, Sharon F.] Genet Alliance, Washington, DC USA; [Damiani, Stephen A.] Mission Massimo Fdn Inc, Elsternwick, Vic, Australia; [Damiani, Stephen A.] Mission Massimo Fdn Inc, Westlake Village, CA USA; [Might, Matthew] NGLY1 Org, Salt Lake City, UT USA; [Might, Matthew] Univ Utah, Salt Lake City, UT USA; [Terry, Sharon F.] PXE Int Inc, Washington, DC USA	Terry, SF (reprint author), 4301 Connecticut Ave NW,Suite 404, Washington, DC 20008 USA.	sterry@geneticalliance.org			PCORI [PPRN-1306-04899]; Robert Wood Johnson Foundation [71636]; PXE International	Contract grant sponsors: PCORI (contract PPRN-1306-04899); Robert Wood Johnson Foundation (grant 71636); PXE International.	Need AC, 2012, J MED GENET, V49, P353, DOI 10.1136/jmedgenet-2012-100819; de Ligt J, 2012, NEW ENGL J MED, V367, P1921, DOI 10.1056/NEJMoa1206524; Ellard S, 2013, HUM MUTAT, V34, P1583, DOI 10.1002/humu.22400; Boycott KM, 2013, NAT REV GENET, V14, P681, DOI 10.1038/nrg3555; Fokkema IFAC, 2011, HUM MUTAT, V32, P557, DOI 10.1002/humu.21438; Rauch A, 2012, LANCET, V380, P1674, DOI 10.1016/S0140-6736…	35	2	2	1	1	WILEY-BLACKWELL	HOBOKEN	111 RIVER ST, HOBOKEN 07030-5774, NJ USA	1059-7794	1098-1004		HUM MUTAT	Hum. Mutat.	OCT	2015	36	10			SI
J	Johnston, A; Fink, D; Reynolds, MD; Hochachka, WM; Sullivan, BL; Bruns, NE; Hallstein, E; Merrifield, MS; Matsumoto, S; Kelling, S				Johnston, Alison; Fink, Daniel; Reynolds, Mark D.; Hochachka, Wesley M.; Sullivan, Brian L.; Bruns, Nicholas E.; Hallstein, Eric; Merrifield, Matt S.; Matsumoto, Sandi; Kelling, Steve			Abundance models improve spatial and temporal prioritization of conservation resources	ECOLOGICAL APPLICATIONS			English	Article						abundance; agriculture; citizen science; conservation prioritization; dynamic conservation; eBird; precision conservation; spatiotemporal models; species distribution models; waterbirds	SPECIES DISTRIBUTION MODELS; PRESENCE-ABSENCE DATA; SCIENCE	Conservation prioritization requires knowledge about organism distribution and density. This information is often inferred from models that estimate the probability of species occurrence rather than from models that estimate species abundance, because abundance data are harder to obtain and model. However, occurrence and abundance may not display similar patterns and therefore development of robu…	[Johnston, Alison; Fink, Daniel; Hochachka, Wesley M.; Sullivan, Brian L.; Bruns, Nicholas E.; Kelling, Steve] Cornell Lab Ornithol, Ithaca, NY 14850 USA; [Reynolds, Mark D.; Hallstein, Eric; Merrifield, Matt S.; Matsumoto, Sandi] Nature Conservancy, Calif Program, San Francisco, CA 94105 USA	Johnston, A (reprint author), Cornell Lab Ornithol, 159 Sapsucker Woods Rd, Ithaca, NY 14850 USA.	alison.johnston@bto.org			Seaver Institute; Leon Levy Foundation; Wolf Creek Foundation; NASA [NNH12ZDA001N-ECOF]; Nature Conservancy California	We thank the many eBird participants for their data contributions, Kevin Webb for assistance with data acquisition, Frank La Sorte, Chris Wood, and Marshall Iliff for valuable discussions, Will Morris for assistance with figures, and reviewers for comments on the manuscript. This work was funded by The Seaver Institute, The Leon Levy Foundation, The Wolf Creek Foundation, NASA (NNH12ZDA001N-ECOF)…	Conlisk E, 2007, AM NAT, V170, P651, DOI 10.1086/521339; He F, 2007, AM NAT, V170, P655, DOI 10.1086/521340; Fink D, 2014, AI MAG, V35, P19; Nichols JD, 2009, ENVIRON ECOL STAT SE, V3, P201, DOI 10.1007/978-0-387-78151-8_9; Runge CA, 2014, FRONT ECOL ENVIRON, V12, P395, DOI 10.1890/130237; Guisan A, 2013, ECOL LETT, V16, P1424, DOI 10.1111/ele.12189; Finley AO, 2011, METHODS ECOL EVOL, V2, P143, …	37	0	0	18	18	ECOLOGICAL SOC AMER	WASHINGTON	1990 M STREET NW, STE 700, WASHINGTON, DC 20036 USA	1051-0761	1939-5582		ECOL APPL	Ecol. Appl.	OCT	2015	25	7
J	Peron, G; Altwegg, R				Peron, Guillaume; Altwegg, Res			Low bird diversity in the Fynbos plant diversity hotspot: Quaternary legacies in the current distributions of passerine birds	ECOGRAPHY			English	Article							SPECIES RICHNESS; BIODIVERSITY HOTSPOTS; INSECT DIVERSITY; SOUTHERN AFRICA; CAPE FYNBOS; PATTERNS; ENERGY; ASSEMBLAGES; ABUNDANCE; DYNAMICS	The Fynbos Biome or Cape Floristic Region is well-known for its plant diversity. This diversity does not seem to carry over at higher trophic levels, and in particular in birds. Here, we analyzed the passerine bird assemblages of the Fynbos Biome at the quarter degree resolution with occupancy models and citizen science data. Multivariate analysis of distribution summary metrics revealed a gradie…	[Peron, Guillaume; Altwegg, Res] Univ Cape Town, Dept Stat Sci, Environm & Conservat, Stat Ecol, ZA-7701 Cape Town, South Africa; [Altwegg, Res] Univ Cape Town, African Climate & Dev Initiat, ZA-7701 Rondebosch, South Africa	Peron, G (reprint author), Univ Cape Town, Dept Stat Sci, Environm & Conservat, Stat Ecol, ZA-7701 Cape Town, South Africa.	peron_guillaume@yahoo.fr			SANBI; National Research Foundation of South Africa [85802]	We thank the volunteer atlasers who collected the data and the Animal Demography Unit at Univ. of Cape Town for making the data available to us. C. Beale, F. Bled, G. Duckworth, D. Guo, B. Huntley, S. Mecenero, and Statistics South Africa helped with covariate data access and formatting. We thank T. Verboom for a stimulating discussion, and three anonymous reviewers for particularly helpful sugge…	Chase BM, 2007, EARTH-SCI REV, V84, P103, DOI 10.1016/j.earscirev.2007.06.002; Coppack T, 2004, ADV ECOL RES, V35, P131, DOI 10.1016/S0065-2504(04)35007-5; Royle JA, 2003, ECOLOGY, V84, P777, DOI 10.1890/0012-9658(2003)084[0777:EAFRPA]2.0.CO;2; Evans KL, 2006, GLOBAL ECOL BIOGEOGR, V15, P372, DOI 10.1111/j.1466-822x.2006.00228.x; Beresford P, 2005, P ROY SOC B-BIOL SCI, V272, P849, DOI 10.1098/rs…	42	0	0	8	8	WILEY-BLACKWELL	HOBOKEN	111 RIVER ST, HOBOKEN 07030-5774, NJ USA	0906-7590	1600-0587		ECOGRAPHY	Ecography	OCT	2015	38	10
J	Lacour, S; Loeve, S; Laurent, B; Albe, V; Delemarle, A; Bartenlian, B; Lanone, S				Lacour, Stephanie; Loeve, Sacha; Laurent, Brice; Albe, Virginie; Delemarle, Aurelie; Bartenlian, Bernard; Lanone, Sophie			Deliberating responsibility: a collective contribution by the C'Nano IdF Nanoscience & Society Office	FOUNDATIONS OF CHEMISTRY			English	Article						Nanosciences; Nanotechnology; Controversies; Responsibility; Public debates	NANOTECHNOLOGY; GOVERNANCE; SCIENCE; NANOMATERIALS	The very existence of explicit techno-scientific controversies in the "nano" arena is often denied on behalf of a conception of science, risks, public engagement and responsibility which borders on a disembodied idealism and merits at least serious discussion. The recurrence of this view prompted us to clarify our position regarding our common field of research, in order to avoid being trapped in…	[Lacour, Stephanie] Univ Paris Ouest Nanterre La Def, ENS Cachan, CNRS, ISP, Cachan, France; [Loeve, Sacha] Univ Technol Compiegne, COSTECH, Compiegne, France; [Laurent, Brice] Mines ParisTech, CSI, Paris, France; [Albe, Virginie] Univ Paris Ouest Nanterre La Def, ENS Cachan, CNRS, ISP, Cachan, France; [Delemarle, Aurelie] ESIEE, Noisy Le Grand, France; [Bartenlian, Bernard] Univ Paris 11, CNRS, …	Lacour, S (reprint author), Univ Paris Ouest Nanterre La Def, ENS Cachan, CNRS, ISP, Cachan, France.	stephanie.lacour@cnrs.fr			Nanocience Society axis; C'Nano IdF	The C'Nano IdF has funded a series of one-year research programs along its Nanocience & Society axis. In 2006: ERMAN (Impact of nanotechnology on markets emergence and reconfiguration: The role of public framing); NanoTubTox (Carbon nanotubes effects on the respiratory system: The roles of intracellular localization of nanotubes, aggregate formation and surface reactivity); Pilote (Epistemologica…	[Anonymous], 2004, SOC ETH ISS NAN POST; Loeve S, 2010, HYLE, V16, P3; COLLINS HM, 1983, ANNU REV SOCIOL, V9, P265, DOI 10.1146/annurev.so.09.080183.001405; McCarthy E, 2010, SOC STUD SCI, V40, P405, DOI 10.1177/0306312709351762; Stamm H, 2011, NATURE, V476, P399, DOI 10.1038/476399c; Renn O, 2006, J NANOPART RES, V8, P153, DOI 10.1007/s11051-006-9092-7; Carrier M, 2011, BOST STUD PHILOS SCI, V27…	75	0	0	2	2	SPRINGER	DORDRECHT	VAN GODEWIJCKSTRAAT 30, 3311 GZ DORDRECHT, NETHERLANDS	1386-4238	1572-8463		FOUND CHEM	Found. Chem.	OCT	2015	17	3			SI
J	Allan, JD; Smith, SDP; McIntyre, PB; Joseph, CA; Dickinson, CE; Marino, AL; Biel, RG; Olson, JC; Doran, PJ; Rutherford, ES; Adkins, JE; Adeyemo, AO				Allan, J. David; Smith, Sigrid D. P.; McIntyre, Peter B.; Joseph, Christine A.; Dickinson, Caitlin E.; Marino, Adrienne L.; Biel, Reuben G.; Olson, James C.; Doran, Patrick J.; Rutherford, Edward S.; Adkins, Jeffrey E.; Adeyemo, Adesola O.			Using cultural ecosystem services to inform restoration priorities in the Laurentian Great Lakes	FRONTIERS IN ECOLOGY AND THE ENVIRONMENT			English	Article							CONSERVATION; BIODIVERSITY; MANAGEMENT; SPACE	Ecological restoration programs often attempt to maintain or enhance ecosystem services (ES), but fine-scale maps of multiple ES are rarely available to support prioritization among potential projects. Here we use agency reports, citizen science, and social media as data sources to quantify the spatial distribution of five recreational elements of cultural ES (CES) - sport fishing, recreational b…	[Allan, J. David; Smith, Sigrid D. P.; Joseph, Christine A.; Dickinson, Caitlin E.; Marino, Adrienne L.] Univ Michigan, Sch Nat Resources & Environm, Ann Arbor, MI 48109 USA; [McIntyre, Peter B.] Univ Wisconsin, Ctr Limnol, Madison, WI 53706 USA; [Biel, Reuben G.] Oregon State Univ, Dept Integrat Biol, Corvallis, OR 97331 USA; [Olson, James C.] Michigan Technol Univ, Dept Biol Sci, Houghton, MI 4…	Allan, JD (reprint author), Univ Michigan, Sch Nat Resources & Environm, Ann Arbor, MI 48109 USA.	dallan@umich.edu			Fred A and Barbara M Erb Family Foundation; University of Michigan Water Center; US National Science Foundation [DEB-1115025]; Packard Foundation (PBM)	We thank fisheries managers throughout the GL region for providing data on angler effort for sport fishers; S Wood for assistance with analyzing photographs in Flickr for beach visitation data; C Wood and the Cornell Laboratory of Ornithology for providing eBird data; and B Cardinale, M Moore, and P Wiley for comments on an earlier draft. This project was funded by the Fred A and Barbara M Erb Fa…	Chan KMA, 2006, PLOS BIOL, V4, P2138, DOI 10.1371/journal.pbio.0040379; Allan JD, 2013, P NATL ACAD SCI USA, V110, P372, DOI 10.1073/pnas.1213841110; Naidoo R, 2008, P NATL ACAD SCI USA, V105, P9495, DOI 10.1073/pnas.0707823105; Milcu AI, 2013, ECOL SOC, V18, DOI 10.5751/ES-05790-180344; van Berkel DB, 2014, ECOL INDIC, V37, P163, DOI 10.1016/j.ecolind.2012.06.025; Palmer MA, 2009, SCIENCE, V325,…	32	0	0	26	26	ECOLOGICAL SOC AMER	WASHINGTON	1990 M STREET NW, STE 700, WASHINGTON, DC 20036 USA	1540-9295	1540-9309		FRONT ECOL ENVIRON	Front. Ecol. Environ.	OCT	2015	13	8
J	Ulman, YI; Cakar, T; Yildiz, G				Ulman, Yesim Isil; Cakar, Tuna; Yildiz, Gokcen			Ethical Issues in Neuromarketing: "I Consume, Therefore I am!"	SCIENCE AND ENGINEERING ETHICS			English	Article						Neuromarketing; Neuroscience; Ethical issues; Human dignity; Public engagement	HUMAN BRAIN; DECISION; NEUROECONOMICS; REPRESENTATION; NEUROETHICS; BEHAVIOR; AROUSAL; MEMORY; CHOICE; TASTE	Neuromarketing is a recent interdisciplinary field which crosses traditional boundaries between neuroscience, neuroeconomics and marketing research. Since this nascent field is primarily concerned with improving marketing strategies and promoting sales, there has been an increasing public aversion and protest against it. These protests can be exemplified by the reactions observed lately in Baylor…	[Ulman, Yesim Isil] Acibadem Univ, Sch Med, Dept Med Hist & Eth, Istanbul, Turkey; [Cakar, Tuna] Middle E Tech Univ, Inst Informat, Cognit Sci Program, Cankaya, Turkey; [Yildiz, Gokcen] Bogazici Univ, Inst Biomed Engn, Istanbul, Turkey	Cakar, T (reprint author), Middle E Tech Univ, Inst Informat, Cognit Sci Program, Cankaya, Turkey.	yesimul@yahoo.com; cakar.tuna@gmail.com; gokcen132@gmail.com					Andorno R., 2005, J INT BIOTECH LAW, V2, P133, DOI 10.1515/jibl.2005.2.4.133; Chartrand TL, 2008, J CONSUM RES, V35, P189, DOI 10.1086/588685; Krishna A, 2008, J CONSUM RES, V34, P807, DOI 10.1086/523286; Plassmann H, 2012, J CONSUM PSYCHOL, V22, P18, DOI 10.1016/j.jcps.2011.11.010; Chessa AG, 2007, MARKET SCI, V26, P130, DOI 10.1287/mksc.1060.0212; Dolcos F, 2004, NEUROIMAGE, V23, P64, DOI 10.10…	56	0	0	46	46	SPRINGER	DORDRECHT	VAN GODEWIJCKSTRAAT 30, 3311 GZ DORDRECHT, NETHERLANDS	1353-3452	1471-5546		SCI ENG ETHICS	Sci. Eng. Ethics	OCT	2015	21	5
J	Eglington, SM; Brereton, TM; Tayleur, CM; Noble, D; Risely, K; Roy, DB; Pearce-Higgins, JW				Eglington, Sarah M.; Brereton, Tom M.; Tayleur, Catherine M.; Noble, David; Risely, Kate; Roy, David B.; Pearce-Higgins, James W.			Patterns and causes of covariation in bird and butterfly community structure	LANDSCAPE ECOLOGY			English	Article						Citizen science; Community specialisation; Diversity; Evenness; Species richness; Surrogacy approaches	SPECIES RICHNESS PATTERNS; LANDSCAPE STRUCTURE; BIOTIC HOMOGENIZATION; RESERVE SELECTION; VASCULAR PLANTS; BREEDING BIRDS; DIFFERENT TAXA; DIVERSITY; BIODIVERSITY; CONSERVATION	Variation in biological communities is used to identify biodiversity responses to anthropogenic drivers, and to guide conservation responses. Often, such data are only available for a limited group of species, with uncertain applicability to unmonitored taxa. Using equivalent data on the community structure of two contrasting taxa, we examine spatial co-variation in both communities, and test the…	[Eglington, Sarah M.; Noble, David; Risely, Kate; Pearce-Higgins, James W.] British Trust Ornithol, Norfolk IP24 2PU, England; [Brereton, Tom M.] Butterfly Conservat, Wareham BH20 5QP, Dorset, England; [Tayleur, Catherine M.] Univ Cambridge, Dept Zool, Cambridge CB2 3EJ, England; [Roy, David B.] NERC, Ctr Ecol & Hydrol, Wallingford OX10 8BB, Oxon, England	Pearce-Higgins, JW (reprint author), British Trust Ornithol, Norfolk IP24 2PU, England.	james.pearce-higgins@bto.org	Roy, David/A-6619-2009	Roy, David/0000-0002-5147-0331	British Trust for Ornithology (BTO); Royal Society for the Protection of Birds (RSPB); Joint Nature Conservation Committee (JNCC); Defra; Joint Nature Conservation Council (JNCC); Natural Resources Wales (NRW); Scottish Natural Heritage (SNH); Natural England; Forestry Commission (FC)	We would like to thank all those professional and amateur ornithologists who contributed to the collection of field data. The BBS is funded jointly by the British Trust for Ornithology (BTO), the Royal Society for the Protection of Birds (RSPB) and the Joint Nature Conservation Committee (JNCC). The WBCS is a partnership between the Centre for Ecology and Hydrology (CEH), Butterfly Conservation a…	Atauri JA, 2001, LANDSCAPE ECOL, V16, P147, DOI 10.1023/A:1011115921050; Le Viol I, 2012, BIOL LETTERS, V8, P780, DOI 10.1098/rsbl.2012.0496; Fuller RJ, 1997, ECOGRAPHY, V20, P295, DOI 10.1111/j.1600-0587.1997.tb00374.x; EHRLICH PR, 1964, EVOLUTION, V18, P586, DOI 10.2307/2406212; Franco AMA, 2009, J APPL ECOL, V46, P82, DOI 10.1111/j.1365-2664.2008.01598.x; Grenyer R, 2006, NATURE, V444, P93, DO…	59	0	0	28	28	SPRINGER	DORDRECHT	VAN GODEWIJCKSTRAAT 30, 3311 GZ DORDRECHT, NETHERLANDS	0921-2973	1572-9761		LANDSCAPE ECOL	Landsc. Ecol.	OCT	2015	30	8
J	Sleenhoff, S; Cuppen, E; Osseweijer, P				Sleenhoff, Susanne; Cuppen, Eefje; Osseweijer, Patricia			Unravelling emotional viewpoints on a bio-based economy using Q methodology	PUBLIC UNDERSTANDING OF SCIENCE			English	Article						bio-based economy; emotions; public engagement; Q methodology; science communication; visual representations	CLIMATE-CHANGE; INDUSTRIAL BIOTECHNOLOGY; SOCIAL REPRESENTATIONS; PUBLIC ENGAGEMENT; SCIENCE; RISKS; COMMUNICATION; PERCEPTIONS; ATTITUDES; BEHAVIOR	A transition to a bio-based economy will affect society and requires collective action from a broad range of stakeholders. This includes the public, who are largely unaware of this transition. For meaningful public engagement people's emotional viewpoints play an important role. However, what the public's emotions about the transition are and how they can be taken into account is underexposed in …	[Sleenhoff, Susanne; Cuppen, Eefje; Osseweijer, Patricia] Delft Univ Technol, NL-2628 BC Delft, Netherlands; [Sleenhoff, Susanne; Osseweijer, Patricia] CSG Ctr Soc & Life Sci, Nijmegen, Netherlands; [Sleenhoff, Susanne; Osseweijer, Patricia] Kluyver Ctr Genom Ind Fermentat, Delft, Netherlands	Sleenhoff, S (reprint author), Delft Univ Technol, Dept Biotechnol, Sect Biotechnol & Soc, Julianalaan 67, NL-2628 BC Delft, Netherlands.	s.sleenhoff@tudelft.nl	Cuppen, Eefje/M-1775-2015	Cuppen, Eefje/0000-0003-2943-4761	Netherlands Genomics Initiative / Netherlands Organization for Scientific Research	This article is the result of a research project of the CSG Centre for Society and the Life Sciences, carried out within the research programme of the Kluyver Centre for Genomics of Industrial Fermentation in The Netherlands, funded by the Netherlands Genomics Initiative / Netherlands Organization for Scientific Research.	Kahan D, 2010, NATURE, V463, P296, DOI 10.1038/463296a; Whitmarsh L, 2011, GLOBAL ENVIRON CHANG, V21, P56, DOI 10.1016/j.gloenvcha.2010.07.011; Hoijer B, 2010, PUBLIC UNDERST SCI, V19, P717, DOI 10.1177/0963662509348863; [Anonymous], 2002, CONSTELLATIONS, DOI 10.1111/1467-8675.00269; Loewenstein GF, 2001, PSYCHOL BULL, V127, P267, DOI 10.1037//0033-2909.127.2.267; Michael M, 2002, SCI TECHNOL HUM…	88	0	0	11	11	SAGE PUBLICATIONS LTD	LONDON	1 OLIVERS YARD, 55 CITY ROAD, LONDON EC1Y 1SP, ENGLAND	0963-6625	1361-6609		PUBLIC UNDERST SCI	Public Underst. Sci.	OCT	2015	24	7
J	Peters-Burton, EE				Peters-Burton, Erin E.			Outcomes of a Self-Regulated Learning Curriculum Model Network Analysis of Middle School Students' Views of Nature of Science	SCIENCE & EDUCATION			English	Article							SCIENTIFIC-KNOWLEDGE; TEACHING NATURE; EPISTEMOLOGY; EXPLICIT; PHYSICS; IDEAS; METACOGNITION; INSTRUCTION; ACHIEVEMENT; MOTIVATION	The purpose of this study was to describe connections among students' views of nature of science in relation to the goals of a curriculum delivered in a unique setting, one where a researcher and two teachers collaborated to develop a course devoted to teaching students about how knowledge is built in science. Students proceeded through a cycle of self-regulated phases, forethought, performance, …	George Mason Univ, Coll Educ & Human Dev, Fairfax, VA 22030 USA	Peters-Burton, EE (reprint author), George Mason Univ, Coll Educ & Human Dev, 4400 Univ Dr,MSN 4B3, Fairfax, VA 22030 USA.	epeters1@gmu.edu	Peters-Burton, Erin/G-1851-2015	Peters-Burton, Erin/0000-0003-1233-9119			Akerson V. S., 2012, NAT ASS RES SCI TEAC; American Association for the Advancement of Science, 1993, BENCHM SCI LIT; Anderson J. R., 1981, COGNITIVE SKILLS THE; Sandoval WA, 2003, J RES SCI TEACH, V40, P369, DOI 10.1002/tea.10081; Duschl RA, 2013, SCI EDUC-NETHERLANDS, V22, P2109, DOI 10.1007/s11191-012-9539-4; Abd-El-Khalick F, 1998, SCI EDUC, V82, P417, DOI 10.1002/(SICI)1098-237X(199807)82:4<…	75	0	0	35	35	SPRINGER	DORDRECHT	VAN GODEWIJCKSTRAAT 30, 3311 GZ DORDRECHT, NETHERLANDS	0926-7220	1573-1901		SCI EDUC-NETHERLANDS	Sci. Educ.	OCT	2015	24	2015-07-08
J	Kays, R; Costello, R; Forrester, T; Baker, MC; Parsons, AW; Kalies, EL; Hess, G; Millspaugh, JJ; McShea, W				Kays, Roland; Costello, Robert; Forrester, Tavis; Baker, Megan C.; Parsons, Arielle W.; Kalies, Elizabeth L.; Hess, George; Millspaugh, Joshua J.; McShea, William			Cats are rare where coyotes roam	JOURNAL OF MAMMALOGY			English	Article						camera trap; Canis latrans; citizen science; Felis catus; invasive species; protected areas	DOMESTIC CATS; UNITED-STATES; HOME-RANGE; PATTERNS	Domestic cats (Felis catus) have caused the extinction of many island species and are thought to kill many billions of birds and mammals in the continental United States each year. However, the spatial distribution and abundance of cats and their risk to our protected areas remains unknown. We worked with citizen scientists to survey the mammals at 2,117 sites in 32 protected areas and one urban …	[Kays, Roland; Parsons, Arielle W.] North Carolina Museum Nat Sci, Raleigh, NC 27601 USA; [Kays, Roland; Hess, George] N Carolina State Univ, Dept Forestry & Environm Resources, Raleigh, NC 27695 USA; [Kays, Roland; Costello, Robert] Smithsonian Natl Museum Nat Hist, Washington, DC 20560 USA; [Forrester, Tavis; Baker, Megan C.; McShea, William] Smithsonian Conservat Biol Inst, Front Royal, VA 226…	Kays, R (reprint author), North Carolina Museum Nat Sci, 11 W Jones St, Raleigh, NC 27601 USA.	Roland.Kays@NCSU.edu			National Science Foundation [1232442, 1319293]; VWR Foundation; US Forest Service; North Carolina Museum of Natural Sciences; Smithsonian Institution	We thank all of our 486 volunteers for their hard work collecting data for this study, including Master Naturalists, 3 North Carolina State University undergraduate classes, Prairie Ridge Ecostation, and students from Exploris Middle School. For their field assistance and volunteer coordination, we thank A. Rogers, J. Pearson, K. Hollifield, M. Davies, S. Hartley, B. Davis, G. Schneider, D. Walke…	Gehrt SD, 2009, J MAMMAL, V90, P1045, DOI 10.1644/08-MAMM-A-277.1; Hammer RB, 2004, LANDSCAPE URBAN PLAN, V69, P183, DOI 10.1016/j.landurbplan.2003.08.011; Clarke AL, 2002, NAT AREA J, V22, P154; Quinn T, 1997, NORTHWEST SCI, V71, P1; Cooper CB, 2007, ECOL SOC, V12; [Anonymous], 1984, J R STAT SOC C-APPL; Johnson VE, 2004, ANN STAT, V32, P2361, DOI 10.1214/009053604000000616; Horn JA, 2011, J WIL…	27	0	0	18	18	OXFORD UNIV PRESS INC	CARY	JOURNALS DEPT, 2001 EVANS RD, CARY, NC 27513 USA	0022-2372	1545-1542		J MAMMAL	J. Mammal.	2015-09-29	2015	96	5
J	Liu, B; Wu, HY; Wang, YD; Liu, WM				Liu, Bo; Wu, Huayi; Wang, Yandong; Liu, Wenming			Main Road Extraction from ZY-3 Grayscale Imagery Based on Directional Mathematical Morphology and VGI Prior Knowledge in Urban Areas	PLOS ONE			English	Article							RESOLUTION SATELLITE IMAGES; CENTERLINE EXTRACTION; LINEAR FEATURES; SHAPE-FEATURES; AERIAL IMAGES; PATH OPENINGS; NETWORK; SEGMENTATION; CLOSINGS	Main road features extracted from remotely sensed imagery play an important role in many civilian and military applications, such as updating Geographic Information System (GIS) databases, urban structure analysis, spatial data matching and road navigation. Current methods for road feature extraction from high-resolution imagery are typically based on threshold value segmentation. It is difficult…	[Liu, Bo; Wu, Huayi; Wang, Yandong; Liu, Wenming] Wuhan Univ, State Key Lab Informat Engn Surveying Mapping & R, Wuhan 430072, Peoples R China; [Liu, Bo] E China Inst Technol, Fac Geomat, Nanchang City, Peoples R China; [Liu, Bo] E China Inst Technol, Natl Adm Surveying Mapping & Geoinformat, Key Lab Watershed Ecol & Geog Environm Monitoring, Nanchang City, Peoples R China	Wang, YD (reprint author), Wuhan Univ, State Key Lab Informat Engn Surveying Mapping & R, Wuhan 430072, Peoples R China.	ydwang@whu.edu.cn			National Natural Science Foundation of China [41201395, 41161069, 41271399]; Specialized Research Fund for the Doctoral Program of Higher Education [20120141110036]; Science and Technology Project of Jiangxi Provincial Education Department [GJJ14479]; Key Laboratory of Watershed Ecology and Geographical Environment Monitoring, NASG [WE2015011]	This work was supported by the National Natural Science Foundation of China (No. 41201395, 41161069,41271399), the Specialized Research Fund for the Doctoral Program of Higher Education (No. 20120141110036), Science and Technology Project of Jiangxi Provincial Education Department (No. GJJ14479), and the Key Laboratory of Watershed Ecology and Geographical Environment Monitoring, NASG (WE2015011).	Sezgin M, 2004, J ELECTRON IMAGING, V13, P146, DOI [10.1117/1.1631315, 10.1117/1.16313161]; OTSU N, 1979, IEEE T SYST MAN CYB, V9, P62; Mokhtarzade M, 2007, INT J APPL EARTH OBS, V9, P32, DOI 10.1016/j.jag.2006.05.001; Barzohar M, 1996, IEEE T PATTERN ANAL, V18, P707, DOI 10.1109/34.506793; Quackenbush LJ, 2004, PHOTOGRAMM ENG REM S, V70, P1383; Tuia D, 2009, IEEE T GEOSCI REMOTE, V47, P3866, DOI…	27	0	0	5	5	PUBLIC LIBRARY SCIENCE	SAN FRANCISCO	1160 BATTERY STREET, STE 100, SAN FRANCISCO, CA 94111 USA	1932-6203			PLOS ONE	PLoS One	2015-09-23	2015	10	9
J	Stewart, L; MacLean, EL; Ivy, D; Woods, V; Cohen, E; Rodriguez, K; McIntyre, M; Mukherjee, S; Call, J; Kaminski, J; Miklosi, A; Wrangham, RW; Hare, B				Stewart, Laughlin; MacLean, Evan L.; Ivy, David; Woods, Vanessa; Cohen, Eliot; Rodriguez, Kerri; McIntyre, Matthew; Mukherjee, Sayan; Call, Josep; Kaminski, Juliane; Miklosi, Adam; Wrangham, Richard W.; Hare, Brian			Citizen Science as a New Tool in Dog Cognition Research	PLOS ONE			English	Article							CANIS-FAMILIARIS; DOMESTIC DOG; POINTING GESTURES; SOCIAL DOG; WOLVES; TRAITS; HUMANS; COMPREHENSION; VALIDATION; HYPOTHESIS	Family dogs and dog owners offer a potentially powerful way to conduct citizen science to answer questions about animal behavior that are difficult to answer with more conventional approaches. Here we evaluate the quality of the first data on dog cognition collected by citizen scientists using the Dognition. com website. We conducted analyses to understand if data generated by over 500 citizen sc…	[Stewart, Laughlin; Ivy, David; Woods, Vanessa; Cohen, Eliot; Hare, Brian] Canines Inc, Canine Res Dept, Durham, NC 27701 USA; [MacLean, Evan L.; Woods, Vanessa; Rodriguez, Kerri; Hare, Brian] Duke Univ, Dept Evolutionary Anthropol, Durham, NC USA; [MacLean, Evan L.] Univ Arizona, Sch Anthropol, Tucson, AZ USA; [McIntyre, Matthew] 23 & Me Inc, Dept Stat, Mountain View, CA USA; [Mukherjee, Sayan] …	Hare, B (reprint author), Canines Inc, Canine Res Dept, Durham, NC 27701 USA.	b.hare@duke.edu			Hungarian Academy of Sciences [MTA 01 031]; 23 and me, Inc.	The work of A.M. was supported by the Hungarian Academy of Sciences (MTA 01 031). Co-authors Laughlin Stewart, David Ivy, Vanessa Woods, and Eliot Cohen are employed by Canines, Inc. Co-author Matthew McIntyre is employed by 23 and me, Inc. Canines, Inc., and 23 and me, Inc., provided support in the form of salaries for authors LS, DI, VW, EC and MM respectively, but did not have any additional r…	Turcsan B, 2011, APPL ANIM BEHAV SCI, V132, P61, DOI 10.1016/j.applanim.2011.03.006; Hare B, 2005, TRENDS COGN SCI, V9, P439, DOI 10.1016/j.tics.2005.07.003; Wobber V, 2009, BEHAV PROCESS, V81, P423, DOI 10.1016/j.beproc.2009.04.003; Lintott CJ, 2008, MON NOT R ASTRON SOC, V389, P1179, DOI 10.1111/j.1365-2966.2008.13689.x; Joly-Mascheroni RM, 2008, BIOL LETTERS, V4, P446, DOI 10.1098/rsbl.2008.03…	51	0	0	7	7	PUBLIC LIBRARY SCIENCE	SAN FRANCISCO	1160 BATTERY STREET, STE 100, SAN FRANCISCO, CA 94111 USA	1932-6203			PLOS ONE	PLoS One	2015-09-16	2015	10	9
J	Williams, SM; Holmes, BJ; Pepperell, JG				Williams, Samuel M.; Holmes, Bonnie J.; Pepperell, Julian G.			The Novel Application of Non-Lethal Citizen Science Tissue Sampling in Recreational Fisheries	PLOS ONE			English	Article							MERCURY CONCENTRATIONS; CONSERVATION; MANAGEMENT; SHARKS; GROWTH; MARLIN; BILLFISH; GENETICS; PROGRAMS; NEED	Increasing fishing pressure and uncertainty surrounding recreational fishing catch and effort data promoted the development of alternative methods for conducting fisheries research. A pilot investigation was undertaken to engage the Australian game fishing community and promote the non-lethal collection of tissue samples from the black marlin Istiompax indica, a valuable recreational-only species…	[Williams, Samuel M.] Univ Queensland, Sch Biomed Sci, St Lucia, Qld, Australia; [Holmes, Bonnie J.] Univ Queensland, Sch Biol Sci, St Lucia, Qld, Australia; [Pepperell, Julian G.] Pepperell Res & Consulting Pty Ltd, Noosaville, BC, Australia	Williams, SM (reprint author), Univ Queensland, Sch Biomed Sci, St Lucia, Qld, Australia.	Samuel.williams5@uq.net.au			Game Fishing Association of Australia Research & Development Foundation Inc.; Queensland Game Fishing Association; Sea World Research and Rescue Foundation Inc.; Pepperell Research and Consulting Pty Ltd	This work was supported by the Game Fishing Association of Australia Research & Development Foundation Inc. The funders assisted the in data collection and provided funds, but had no other manuscript. A grant number was not provided with the funds. This work was supported by the Queensland Game Fishing Association (http://www.qgfa.com.au). The funders assisted the in data collection and provided …	Ryman N, 2006, MOL ECOL NOTES, V6, P600, DOI 10.1111/j.1365-294X.2006.01378.x; Chin Andrew, 2014, Pacific Conservation Biology, V20, P48; Zischke MT, 2013, REV FISH BIOL FISHER, V23, P491, DOI 10.1007/s11160-013-9304-z; SEUTIN G, 1991, CAN J ZOOL, V69, P82, DOI 10.1139/z91-013; Kruck NC, 2013, MOL ECOL RESOUR, V13, P715, DOI 10.1111/1755-0998.12112; Ward RD, 2000, HYDROBIOLOGIA, V420, P191, DOI 1…	39	0	0	6	6	PUBLIC LIBRARY SCIENCE	SAN FRANCISCO	1160 BATTERY STREET, STE 100, SAN FRANCISCO, CA 94111 USA	1932-6203			PLOS ONE	PLoS One	2015-09-16	2015	10	9
J	Gibb, SK				Gibb, Steven K.			CITIZEN SCIENCE FACES PUSHBACK	CHEMICAL & ENGINEERING NEWS			English	Article																	0	0	0	3	3	AMER CHEMICAL SOC	WASHINGTON	1155 16TH ST, NW, WASHINGTON, DC 20036 USA	0009-2347	1520-605X		CHEM ENG NEWS	Chem. Eng. News	2015-09-14	2015	93	36
J	Travis, C				Travis, Charles			Visual Geo-Literary and Historical Analysis, Tweetflickrtubing, and James Joyce's Ulysses (1922)	ANNALS OF THE ASSOCIATION OF AMERICAN GEOGRAPHERS			English	Article						digital humanities; GIS; Irish literature and history; social media; humanidades digitales; SIG; literatura e historia irlandesas; medios sociales	GEOGRAPHIC INFORMATION; SPACE-TIME; NEOGEOGRAPHY; GIS; VISUALIZATION; HUMANITIES; POLITICS; EMOTION	Situated at the intersection of the arts and sciences, Humanities GIS (HumGIS) are contributing to new knowledge systems emerging in the digital, spatial, and geo-humanities. This article discusses the conceptualization and operationalization of two HumGIS models engaging the cartographical and discursive tools employed by James Joyce to compose Ulysses ([1922] 1992). The first model is used to p…	Univ Dublin Trinity Coll, Trinity Long Room Hub, Dublin 2, Ireland	Travis, C (reprint author), Univ Dublin Trinity Coll, Trinity Long Room Hub, Dublin 2, Ireland.	ctravis@tcd.ie					Lee JY, 2011, TIJDSCHR ECON SOC GE, V102, P468, DOI 10.1111/j.1467-9663.2010.00649.x; Kraak MJ, 2003, ISPRS J PHOTOGRAMM, V57, P390, DOI 10.1016/S0924-2716(02)00167-3; Kwan MP, 2008, SOC CULT GEOGR, V9, P653, DOI 10.1080/14649360802292462; Kwan MP, 2008, PROF GEOGR, V60, P443, DOI 10.1080/00330120802211752; Travis C, 2014, INT J GEOGR INF SCI, V28, P1149, DOI 10.1080/13658816.2013.829232; Schwane…	75	0	0	4	4	ROUTLEDGE JOURNALS, TAYLOR & FRANCIS LTD	ABINGDON	4 PARK SQUARE, MILTON PARK, ABINGDON OX14 4RN, OXFORDSHIRE, ENGLAND	0004-5608	1467-8306		ANN ASSOC AM GEOGR	Ann. Assoc. Am. Geogr.	2015-09-03	2015	105	5
J	Craglia, M; Shanley, L				Craglia, Max; Shanley, Lea			Data democracy - increased supply of geospatial information and expanded participatory processes in the production of data	INTERNATIONAL JOURNAL OF DIGITAL EARTH			English	Article						citizen science; volunteered geographic information; geospatial data		The global landscape in the supply, co-creation and use of geospatial data is changing very rapidly with new satellites, sensors and mobile devices reconfiguring the traditional lines of demand and supply and the number of actors involved. In this paper we chart some of these technology-led developments and then focus on the opportunities they have created for the increased participation of the p…	[Craglia, Max] Commiss European Communities, Joint Res Ctr, I-21020 Ispra, Italy; [Shanley, Lea] Univ Wisconsin, Gaylord Nelson Inst Environm Studies, Madison, WI USA	Craglia, M (reprint author), Commiss European Communities, Joint Res Ctr, I-21020 Ispra, Italy.	Massimo.Craglia@jrc.ec.europa.eu					Knudsen E, 2011, BIOL REV, V86, P928, DOI 10.1111/j.1469-185X.2011.00179.x; Theobald EJ, 2015, BIOL CONSERV, V181, P236, DOI 10.1016/j.biocon.2014.10.021; Mackechnie C, 2011, J ENVIRON MONITOR, V13, P2687, DOI 10.1039/c1em10615e; Haklay M, 2010, ENVIRON PLANN B, V37, P682, DOI 10.1068/b35097; Newman G, 2012, FRONT ECOL ENVIRON, V10, P298, DOI 10.1890/110294; Craglia M, 2012, INT J DIGIT EARTH, V5…	33	0	0	6	6	TAYLOR & FRANCIS LTD	ABINGDON	4 PARK SQUARE, MILTON PARK, ABINGDON OX14 4RN, OXON, ENGLAND	1753-8947	1753-8955		INT J DIGIT EARTH	Int. J. Digit. Earth	2015-09-02	2015	8	9
J	Wright, DR; Underhill, LG; Keene, M; Knight, AT				Wright, Dale R.; Underhill, Les G.; Keene, Matt; Knight, Andrew T.			Understanding the Motivations and Satisfactions of Volunteers to Improve the Effectiveness of Citizen Science Programs	SOCIETY & NATURAL RESOURCES			English	Article						atlas data; conservation psychology; Environmental Volunteer Functions Inventory (EVFI); evaluation; participatory research; South Africa	CONSERVATION OUTCOMES; FUNCTIONAL-APPROACH; SOUTH-AFRICA; BIODIVERSITY; PROJECT; IMPLEMENTATION; KNOWLEDGE; NETWORK; TOOLS; GAP	Citizen science is a useful approach for conducting scientific research; however, an understanding of the motivations, satisfactions, and other aspects of volunteers' psychology is essential for conservation scientists wishing to mobilize this resource. We tested psychometric instruments for assessing the motivations, satisfactions, and advocacy role of volunteers with the Second Southern African…	[Wright, Dale R.] Univ Cape Town, Percy Fitzpatrick Inst African Ornithol, Dept Biol Sci, ZA-7700 Rondebosch, South Africa; [Underhill, Les G.] Univ Cape Town, Anim Demog Unit, Dept Biol Sci, ZA-7700 Rondebosch, South Africa; [Keene, Matt] US EPA, Evaluat Support Div, Off Policy, Washington, DC 20460 USA; [Knight, Andrew T.] Univ London Imperial Coll Sci Technol & Med, Dept Life Sci, Ascot, Berks…	Wright, DR (reprint author), BirdLife South Africa, 55 Hastings St, ZA-8001 Cape Town, South Africa.	dalewr@gmail.com			Percy FitzPatrick Institute of African Ornithology of the University of Cape Town; University Research Committee of the University of Cape Town; Stellenbosch University; ARC Centre of Excellence in Environmental Decisions at The University of Queensland, Australia; SANBI (South African National Biodiversity Institute)	DRW acknowledges the financial support of the Percy FitzPatrick Institute of African Ornithology of the University of Cape Town and the assistance of the co-authors of this article for much guidance during this research. LGU acknowledges support from the University Research Committee of the University of Cape Town. ATK acknowledges the financial support of Stellenbosch University, and the support…	Ferraro PJ, 2006, PLOS BIOL, V4, P482, DOI 10.1371/journal.pbio.0040105; Salafsky N, 2002, CONSERV BIOL, V16, P1469, DOI 10.1046/j.1523-1739.2002.01232.x; Keene M, 2011, J ENVIRON MANAGE, V92, P2130, DOI 10.1016/j.jenvman.2011.03.035; James A, 2001, BIOSCIENCE, V51, P43, DOI 10.1641/0006-3568(2001)051[0043:CWATCB]2.0.CO;2; Whitelaw G, 2003, ENVIRON MONIT ASSESS, V88, P409, DOI 10.1023/A:102554581…	58	0	0	46	46	TAYLOR & FRANCIS INC	PHILADELPHIA	530 WALNUT STREET, STE 850, PHILADELPHIA, PA 19106 USA	0894-1920	1521-0723		SOC NATUR RESOUR	Soc. Nat. Resour.	2015-09-02	2015	28	9
J	Wilson, SM; Murray, RT; Jiang, CS; Dalemarre, L; Burwell-Naney, K; Fraser-Rahim, H				Wilson, Sacoby M.; Murray, Rianna T.; Jiang, Chengsheng; Dalemarre, Laura; Burwell-Naney, Kristen; Fraser-Rahim, Herb			Environmental Justice Radar: A Tool for Community-Based Mapping to Increase Environmental Awareness and Participatory Decision Making	PROGRESS IN COMMUNITY HEALTH PARTNERSHIPS-RESEARCH EDUCATION AND ACTION			English	Article						Environmental health; health occupations; community-based participatory research; community health partnerships health disparities; environmental justice; geographic information systems	GEOGRAPHIC INFORMATION-SYSTEMS; PUBLIC-PARTICIPATION; PHOTOVOICE; GIS	Background: As part of the Charleston Area Pollution Prevention Partnership (CAPs), studies have been performed to address environmental health issues using various techniques including Geographic Information Systems (GIS) mapping. Most of the mapping has been conducted by academic team members; however, there is a need for more community-based mapping to ensure the sustainability and effectivene…	[Wilson, Sacoby M.; Murray, Rianna T.; Jiang, Chengsheng; Dalemarre, Laura; Burwell-Naney, Kristen] Univ Maryland Coll Pk, Sch Publ Hlth, Maryland Inst Appl Environm Hlth, College Pk, MD 20742 USA; [Fraser-Rahim, Herb] Lowcountry Alliance Model Communities, Charleston, SC USA	Wilson, SM (reprint author), Univ Maryland Coll Pk, Sch Publ Hlth, Maryland Inst Appl Environm Hlth, College Pk, MD 20742 USA.						Dunn CE, 2007, PROG HUM GEOG, V31, P616, DOI 10.1177/0309132507081493; Wilson SM, 2002, ENVIRON HEALTH PERSP, V110, P195; Lopez EDS, 2005, QUAL HEALTH RES, V15, P99, DOI 10.1177/1049732304270766; Wilson SM, 2012, AM J PUBLIC HEALTH, V102, P1974, DOI 10.2105/AJPH.2012.300700; Jankowski P, 2009, J ENVIRON MANAGE, V90, P1966, DOI 10.1016/j.jenvman.2007.08.028; Sieber R, 2006, ANN ASSOC AM GEOGR, V96…	24	0	0	0	0	JOHNS HOPKINS UNIV PRESS	BALTIMORE	JOURNALS PUBLISHING DIVISION, 2715 NORTH CHARLES ST, BALTIMORE, MD 21218-4363 USA	1557-0541	1557-055X		PROG COMM HLTH PARTN	Prog. Community Health Partnersh.	FAL	2015	9	3
J	Jiang, B; Thill, JC				Jiang, Bin; Thill, Jean-Claude			Volunteered Geographic Information: Towards the establishment of a new paradigm	COMPUTERS ENVIRONMENT AND URBAN SYSTEMS			English	Article							SCIENCE	Volunteered Geographic Information (VGI) is user-generated content that is assorted with spatial coordinates. This position paper places VGI in the broader context of data sciences, underscoring its most critical properties, identifies its contribution to the emergence of new social science analytics for urban built environments, and presents some of the remaining challenges. (C) 2015 Published b…	[Jiang, Bin] Univ Gavle, Div Geomat, Gavle, Sweden; [Thill, Jean-Claude] Univ N Carolina, Dept Geog & Earth Sci, Charlotte, NC 28269 USA	Jiang, B (reprint author), Univ Gavle, Div Geomat, Gavle, Sweden.	Binjiang@hig.se; Jean-Claude.Thill@uncc.edu					Anderson Chris, 2006, LONG TAIL WHY FUTURE; Liu Y, 2015, ANN ASSOC AM GEOGR, V105, P512, DOI 10.1080/00045608.2015.1018773; Watts DJ, 2007, NATURE, V445, P489, DOI 10.1038/445489a; Lazer D, 2009, SCIENCE, V323, P721, DOI 10.1126/science.1167742; Goodchild M, 2007, GEOJOURNAL, V69, P211, DOI DOI 10.1007/S10708-007-9111-Y; Jiang B., 2015, GEO J, V80, P1, DOI DOI 10.1007/S10708-014-9537-Y; Laney D.,…	10	0	0	2	2	ELSEVIER SCI LTD	OXFORD	THE BOULEVARD, LANGFORD LANE, KIDLINGTON, OXFORD OX5 1GB, OXON, ENGLAND	0198-9715	1873-7587		COMPUT ENVIRON URBAN	Comput. Environ. Urban Syst.	SEP	2015	53				SI
J	Kunze, C; Hecht, R				Kunze, Carola; Hecht, Robert			Semantic enrichment of building data with volunteered geographic information to improve mappings of dwelling units and population	COMPUTERS ENVIRONMENT AND URBAN SYSTEMS			English	Article						Building model; Disaggregation; Census data; Cadastre data; Land use; Geographic information system; Population mapping; Dasymetric mapping; Volunteered geographic information	URBAN STRUCTURE TYPES; LAND-COVER; OPENSTREETMAP; GIS; SPACE	Small-scale data on dwellings and population density are required for precise geospatial urban modelling. Further, knowledge of building usage is necessary to model socio-economic aspects such as the distribution of dwellings and population. In an effort to limit costs and resourcing efforts, users and institutes in research and spatial planning are developing strategies to extract such informati…	[Kunze, Carola; Hecht, Robert] Leibniz Inst Ecol Urban & Reg Dev Dresden IOER, D-01217 Dresden, Germany	Hecht, R (reprint author), Leibniz Inst Ecol Urban & Reg Dev Dresden IOER, Weberpl 1, D-01217 Dresden, Germany.	carola.kunze@googlemail.com; r.hecht@ioer.de					Banzhaf E, 2008, IEEE J-STARS, V1, P129, DOI 10.1109/JSTARS.2008.2003310; Meinel G, 2009, BUILD RES INF, V37, P468, DOI 10.1080/09613210903159833; Mennis J, 2003, PROF GEOGR, V55, P31; Hecht R, 2013, ISPRS INT GEO-INF, V2, P1066, DOI 10.3390/ijgi2041066; Geiss C, 2011, REMOTE SENS-BASEL, V3, P1447, DOI 10.3390/rs3071447; Lwin K, 2009, T GIS, V13, P401, DOI 10.1111/j.1467-9671.2009.01171.x; Henn A…	61	0	0	2	2	ELSEVIER SCI LTD	OXFORD	THE BOULEVARD, LANGFORD LANE, KIDLINGTON, OXFORD OX5 1GB, OXON, ENGLAND	0198-9715	1873-7587		COMPUT ENVIRON URBAN	Comput. Environ. Urban Syst.	SEP	2015	53				SI
J	Jiang, S; Alves, A; Rodrigues, F; Ferreira, J; Pereira, FC				Jiang, Shan; Alves, Ana; Rodrigues, Filipe; Ferreira, Joseph, Jr.; Pereira, Francisco C.			Mining point-of-interest data from social networks for urban land use classification and disaggregation	COMPUTERS ENVIRONMENT AND URBAN SYSTEMS			English	Article						Information extraction; Machine learning; Points of interest; Land use; Volunteered geographic information	MODEL	Over the last few years, much online volunteered geographic information (VGI) has emerged and has been increasingly analyzed to understand places and cities, as well as human mobility and activity. However, there are concerns about the quality and usability of such VGI. In this study, we demonstrate a complete process that comprises the collection, unification, classification and validation of a …	[Jiang, Shan; Ferreira, Joseph, Jr.] MIT, Dept Urban Studies & Planning, Cambridge, MA 02139 USA; [Alves, Ana] Univ Coimbra, Ctr Informat & Syst, Coimbra, Portugal; [Alves, Ana] Polytech Inst Coimbra, Coimbra, Portugal; [Rodrigues, Filipe] Univ Coimbra, Ctr Informat & Syst, Coimbra, Portugal; [Pereira, Francisco C.] MIT, Dept Civil & Environm Engn, Cambridge, MA 02139 USA	Jiang, S (reprint author), MIT, Dept Urban Studies & Planning, 77 Massachusetts Ave, Cambridge, MA 02139 USA.	shanjang@mit.edu; ana@dei.uc.pt; fmpr@dei.uc.pt; jf@mit.edu; camara@mit.edu			Singapore National Research Foundation (NRF) through the "Future Urban Mobility" program of the Singapore-MIT Alliance for Research and Technology; Fundacao para a Ciencia e a Tecnologia (FCT) through the MIT-Portugal Program; [PTDC/ECM-TRA/1898/2012]	We acknowledge partial support from the Singapore National Research Foundation (NRF) through the "Future Urban Mobility" program of the Singapore-MIT Alliance for Research and Technology, and from the Fundacao para a Ciencia e a Tecnologia (FCT) through the MIT-Portugal Program and the Grant PTDC/ECM-TRA/1898/2012 (INFOCROWDS).	Ferreira J, 2010, TRANSP RES RECORD, P85, DOI 10.3141/2183-10; Elwood S, 2012, ANN ASSOC AM GEOGR, V102, P571, DOI 10.1080/00045608.2011.595657; Salvini P, 2005, NETW SPAT ECON, V5, P217, DOI 10.1007/s11067-005-2630-5; Bowman JL, 2001, TRANSPORT RES A-POL, V35, P1, DOI 10.1016/S0965-8564(99)00043-9; Waddell P, 2002, J AM PLANN ASSOC, V68, P297, DOI 10.1080/01944360208976274; Batty M, 2003, INTEGR…	25	0	0	0	0	ELSEVIER SCI LTD	OXFORD	THE BOULEVARD, LANGFORD LANE, KIDLINGTON, OXFORD OX5 1GB, OXON, ENGLAND	0198-9715	1873-7587		COMPUT ENVIRON URBAN	Comput. Environ. Urban Syst.	SEP	2015	53				SI
J	Foster, A; Dunham, IM				Foster, Alec; Dunham, Ian M.			Volunteered geographic information, urban forests, & environmental justice	COMPUTERS ENVIRONMENT AND URBAN SYSTEMS			English	Article						Volunteered geographic information; Urban forests; Digital divide; Social justice; Geographically weighted general linear models	GREEN SPACE; POLITICAL ECOLOGY; PARK PREFERENCES; UNITED-STATES; STREET TREES; RACE; COVER; OPENSTREETMAP; ACCESSIBILITY; MILWAUKEE	Volunteered Geographic Information (VGI) and urban forests have recently become topics of increasing interest in the social sciences. While social and environmental justice concerns have been applied to each of these topics individually, this paper addresses VGI, urban forests, and social justice simultaneously. VGI has often been hailed as an empowering and democratic new form of citizen science…	[Foster, Alec; Dunham, Ian M.] Temple Univ, Dept Geog & Urban Studies, Philadelphia, PA 19122 USA	Foster, A (reprint author), Temple Univ, Dept Geog & Urban Studies, 308 Gladfelter Hall,1115 Berks St, Philadelphia, PA 19122 USA.	alec.foster@temple.edu					Anderson L. M., 1985, Southern Journal of Applied Forestry, V9, P162; Andreu M. G., 2008, CITY TAMPA URBAN ECO, P84; Crutcher M, 2009, GEOFORUM, V40, P523, DOI 10.1016/j.geoforum.2009.01.003; Ho CH, 2005, J LEISURE RES, V37, P281; Heidt V, 2008, SPRINGER SER ENV MAN, P84, DOI 10.1007/978-0-387-71425-7_6; KAPLAN R, 1988, LANDSCAPE URBAN PLAN, V15, P107, DOI 10.1016/0169-2046(88)90019-9; Payne LL, …	64	1	1	0	0	ELSEVIER SCI LTD	OXFORD	THE BOULEVARD, LANGFORD LANE, KIDLINGTON, OXFORD OX5 1GB, OXON, ENGLAND	0198-9715	1873-7587		COMPUT ENVIRON URBAN	Comput. Environ. Urban Syst.	SEP	2015	53				SI
J	Feick, R; Robertson, C				Feick, Rob; Robertson, Colin			A multi-scale approach to exploring urban places in geotagged photographs	COMPUTERS ENVIRONMENT AND URBAN SYSTEMS			English	Article						User generated content (UGC); Volunteered Geographic Information (VGI); Geotagged photographs (GTP); Local log-odds ratio; Multi-resolution; Flickr	FLICKR TAGS; OPENSTREETMAP	User-generated content (UGC) that contains spatial references, often referred to by the more bounded concept of Volunteered Geographic Information (VGI), is often touted as a potentially revolutionary data source for geographical research. This paper explores the capacity of one increasingly prevalent source of these data, geographically encoded photographs, to capture spatial expressions of plac…	[Feick, Rob] Univ Waterloo, Sch Planning, Waterloo, ON N2L 3G1, Canada; [Robertson, Colin] Wilfrid Laurier Univ, Dept Geog & Environm Studies, Waterloo, ON N2L 3C5, Canada	Feick, R (reprint author), Univ Waterloo, Sch Planning, 200 Univ Ave West, Waterloo, ON N2L 3G1, Canada.	rdfeick@uwaterloo.ca			Social Sciences and Humanities Research Council (SSHRC) of Canada	The authors would like to thank the Social Sciences and Humanities Research Council (SSHRC) of Canada for supporting this research. In addition, the authors are grateful to the three anonymous reviewers for insightful suggestions that have substantially improved this article.	Andrienko N, 2011, IEEE T VIS COMPUT GR, V17, P205, DOI 10.1109/TVCG.2010.44; Rorissa A, 2010, J AM SOC INF SCI TEC, V61, P2230, DOI 10.1002/asi.21401; Jankowski P, 2010, T GIS, V14, P833, DOI 10.1111/j.1467-9671.2010.01235.x; Kear M, 2007, CITIES, V24, P324, DOI 10.1016/j.cities.2007.01.005; Kisilevich S, 2010, LECT NOTES GEOINF CA, P163, DOI 10.1007/978-3-642-12326-9_9; WHITE D, 1992, CARTOGR G…	57	0	0	1	1	ELSEVIER SCI LTD	OXFORD	THE BOULEVARD, LANGFORD LANE, KIDLINGTON, OXFORD OX5 1GB, OXON, ENGLAND	0198-9715	1873-7587		COMPUT ENVIRON URBAN	Comput. Environ. Urban Syst.	SEP	2015	53				SI
J	Sun, YR; Fan, HC; Bakillah, M; Zipf, A				Sun, Yeran; Fan, Hongchao; Bakillah, Mohamed; Zipf, Alexander			Road-based travel recommendation using geo-tagged images	COMPUTERS ENVIRONMENT AND URBAN SYSTEMS			English	Article						Volunteered geographic information; Travel recommendation; Routing planning; Spatial data mining; Semantic routing	PATTERNS	Geotagged photos on social media like Flickr explicitly indicate the trajectories of tourists. They can be employed to reveal the tourists' preference on landmarks and routings of tourism. Most of existing works on routing searches are based on the trajectories of GPS-enabled devices' users. From a distinct point of view, we attempt to propose a novel approach in which the basic unit of routing i…	[Sun, Yeran; Fan, Hongchao; Bakillah, Mohamed; Zipf, Alexander] Heidelberg Univ, Inst Geog, GISci Res Grp, D-69120 Heidelberg, Germany	Sun, YR (reprint author), Room 101,Berliner Str 48, D-69120 Heidelberg, Germany.	yeran.sun@geog.uni-heidelberg.de			CSC (China Scholarship Council)	This research is supported by CSC (China Scholarship Council). We would like to express our gratitude to the three anonymous referees for their comments and thank Christian Sengstock (Database Systems Research Group, Institute of Computer Science, University of Heidelberg) for sharing the research data.	Andrienko G., 2009, IEEE S VIS AN SCI TE, P213; Jankowski P, 2010, T GIS, V14, P833, DOI 10.1111/j.1467-9671.2010.01235.x; Girardin F, 2008, IEEE PERVAS COMPUT, V7, P36, DOI 10.1109/MPRV.2008.71; Wachowicz M, 2011, INT J GEOGR INF SCI, V25, P1849, DOI 10.1080/13658816.2011.561209; Yoon H, 2012, PERS UBIQUIT COMPUT, V16, P469, DOI 10.1007/s00779-011-0419-8; Takeuchi Y, 2006, LECT NOTES COMPUT SC, …	40	3	3	0	0	ELSEVIER SCI LTD	OXFORD	THE BOULEVARD, LANGFORD LANE, KIDLINGTON, OXFORD OX5 1GB, OXON, ENGLAND	0198-9715	1873-7587		COMPUT ENVIRON URBAN	Comput. Environ. Urban Syst.	SEP	2015	53				SI
J	Camboim, SP; Bravo, JVM; Sluter, CR				Camboim, Silvana Philippi; Meza Bravo, Joao Vitor; Sluter, Claudia Robbi			An Investigation into the Completeness of, and the Updates to, OpenStreetMap Data in a Heterogeneous Area in Brazil	ISPRS International Journal of Geo-Information			English	Article						geoinformation quality; assessment; VGI; Brazil; integration	VOLUNTEERED GEOGRAPHIC INFORMATION; EMPIRICAL-EVALUATION; QUALITY; MAPS	The integration of user-generated content made in a collaborative environment is being increasingly considered a valuable input to reference maps, even from official map agencies such as USGS and Ordnance Survey. In Brazil, decades of lack of investment has resulted in a topographic map coverage that is both outdated and unequally distributed throughout the territory. This paper aims to analyze t…	[Camboim, Silvana Philippi; Meza Bravo, Joao Vitor; Sluter, Claudia Robbi] Univ Fed Parana, Dept Geomat, Geodet Sci Grad Program, BR-81531970 Curitiba, Parana, Brazil	Camboim, SP (reprint author), Univ Fed Parana, Dept Geomat, Geodet Sci Grad Program, BR-81531970 Curitiba, Parana, Brazil.	silvanacamboim@gmail.com; jvmbravo@gmail.com; robbisluter@gmail.com					Anand S., 2010, P 2010 AGI GEOCOMMUN; Heipke C, 2010, ISPRS J PHOTOGRAMM, V65, P550, DOI 10.1016/j.isprsjprs.2010.06.005; Liu SB, 2010, CARTOGR GEOGR INF SC, V37, P69; TUAN YF, 1991, ANN ASSOC AM GEOGR, V81, P684, DOI 10.1111/j.1467-8306.1991.tb01715.x; Henderson V, 1997, REG SCI URBAN ECON, V27, P583, DOI 10.1016/S0166-0462(96)02169-2; Jackson SP, 2013, ISPRS INT GEO-INF, V2, P507, DOI 10.3390/i…	45	0	0	0	0	MDPI AG	BASEL	POSTFACH, CH-4005 BASEL, SWITZERLAND	2220-9964			ISPRS INT GEO-INF	ISPRS Int. Geo-Inf.	SEP	2015	4	3
J	Poorazizi, ME; Hunter, AJS; Steiniger, S				Poorazizi, Mohammad Ebrahim; Hunter, Andrew J. S.; Steiniger, Stefan			A Volunteered Geographic Information Framework to Enable Bottom-Up Disaster Management Platforms	ISPRS International Journal of Geo-Information			English	Article						disaster management; volunteered geographic information; content discovery; quality assessment; interoperability	SENSOR WEB ENABLEMENT; SYSTEM; SERVICE; COMMUNITY; TWITTER; OPENSTREETMAP; SOFTWARE; QUALITY; SEARCH; RISK	Recent disasters, such as the 2010 Haiti earthquake, have drawn attention to the potential role of citizens as active information producers. By using location-aware devices such as smartphones to collect geographic information in the form of geo-tagged text, photos, or videos, and sharing this information through online social media, such as Twitter, citizens create Volunteered Geographic Informa…	[Poorazizi, Mohammad Ebrahim; Hunter, Andrew J. S.] Univ Calgary, Dept Geomat Engn, Calgary, AB T2N 1N4, Canada; [Steiniger, Stefan] Pontificia Univ Catolica Chile, Dept Ingn Transporte & Logist, Santiago, Chile	Poorazizi, ME (reprint author), Univ Calgary, Dept Geomat Engn, 2500 Univ Dr NW, Calgary, AB T2N 1N4, Canada.	mepooraz@ucalgary.ca; ahunter@ucalgary.ca; ssteiniger@uc.cl			Alberta Innovates-Technology Futures and Alberta Innovation & Advanced Education; Centro de Desarrollo Urbano Sustentable (CEDEUS) [Conicyt/Fondap/15110020]	Ebrahim Poorazizi is thankful to Alberta Innovates-Technology Futures and Alberta Innovation & Advanced Education for financial support with a graduate student scholarship. Stefan Steiniger has been supported with funding provided by the Centro de Desarrollo Urbano Sustentable (CEDEUS), Conicyt/Fondap/15110020.	Achrekar H., 2011, P 2011 IEEE C COMP C; Agosto E., 2011, APPL GEOMAT, V3, P83, DOI 10.1007/s12518-010-0041-x; Annoni A., 2005, GEOINFORMATION DISAS, P1, DOI DOI 10.1007/B139115; Huang CM, 2010, BMC MED INFORM DECIS, V10, DOI 10.1186/1472-6947-10-57; Weiser A, 2007, LEC NOT GEO CARTO, P239, DOI 10.1007/978-3-540-72108-6_16; Chan CK, 2014, J SPAT SCI, V59, P137; Kazman R, 2012, J SYST SOFTWARE, V8…	97	0	0	2	2	MDPI AG	BASEL	POSTFACH, CH-4005 BASEL, SWITZERLAND	2220-9964			ISPRS INT GEO-INF	ISPRS Int. Geo-Inf.	SEP	2015	4	3
J	Sun, YR; Li, M				Sun, Yeran; Li, Ming			Investigation of Travel and Activity Patterns Using Location-based Social Network Data: A Case Study of Active Mobile Social Media Users	ISPRS International Journal of Geo-Information			English	Article						volunteered geographic information; location-based social network; GIS; travel behavior; activity space; gender difference	GENDER-DIFFERENCES; BEHAVIOR; TRANSPORT; GEOGRAPHIES; WOMEN; GIS	Due to its relatively high availability and low cost, location-based social network (LBSN) (e.g., Foursquare) data (a popular type of volunteered geographic information) seem to be an alternative or complement to survey data in the study of travel behavior and activity analysis. Illustrating this situation, recently, a number of studies attempted to use LBSN data (e.g., Foursquare check-ins) to i…	[Sun, Yeran; Li, Ming] Heidelberg Univ, Inst Geog, GISci Res Grp, D-69120 Heidelberg, Germany	Sun, YR (reprint author), Heidelberg Univ, Inst Geog, GISci Res Grp, Berliner Str 48, D-69120 Heidelberg, Germany.	yeran.sun@geog.uni-heidelberd.de; ming.li@geog.uni-heidelberg.de			China Scholarship Council (CSC); Deutsche Forschungsgemeinschaft (DFG); Ruprecht-Karls-Universitat Heidelberg (Heidelberg University) within the funding programme Open Access Publishing	The authors are thankful to the China Scholarship Council (CSC) for financial support with a PhD scholarship. The authors acknowledge the financial support of the Deutsche Forschungsgemeinschaft (DFG) and Ruprecht-Karls-Universitat Heidelberg (Heidelberg University) within the funding programme Open Access Publishing.	Roick O, 2013, T GIS, V17, P763, DOI 10.1111/tgis.12032; Buliung RN, 2008, TRANSPORTATION, V35, P697, DOI 10.1007/s11116-008-9178-4; GORDON P, 1989, REG STUD, V23, P499, DOI 10.1080/00343408912331345672; BLUMEN O, 1990, PROF GEOGR, V42, P54, DOI 10.1111/j.0033-0124.1990.00054.x; Frandberg L, 2011, J TRANSP GEOGR, V19, P1235, DOI 10.1016/j.jtrangeo.2011.06.004; Root A, 2000, TRANSPORT REV, V20, P3…	38	0	0	2	2	MDPI AG	BASEL	POSTFACH, CH-4005 BASEL, SWITZERLAND	2220-9964			ISPRS INT GEO-INF	ISPRS Int. Geo-Inf.	SEP	2015	4	3
J	Xing, HF; Chen, J; Zhou, XG				Xing, Hanfa; Chen, Jun; Zhou, Xiaoguang			A Geoweb-Based Tagging System for Borderlands Data Acquisition	ISPRS International Journal of Geo-Information			English	Article						borderlands; Geoweb; OpenStreetMap; geospatial blog; spatial publish/subscribe; mashup	VOLUNTEERED GEOGRAPHIC INFORMATION; WEB 2.0; OPENSTREETMAP; PERSPECTIVE; TECHNOLOGY; KNOWLEDGE; CRAWLER; CHINA; MAPS	Borderlands modeling and understanding depend on both spatial and non-spatial data, which were difficult to obtain in the past. This has limited the progress of borderland-related research. In recent years, data collection technologies have developed greatly, especially geospatial Web 2.0 technologies including blogs, publish/subscribe, mashups, and GeoRSS, which provide opportunities for data ac…	[Xing, Hanfa] Shandong Normal Univ, Coll Geog & Environm, Jinan 250014, Peoples R China; [Chen, Jun] Natl Geomat Ctr China, Beijing 100830, Peoples R China; [Zhou, Xiaoguang] Cent S Univ, Sch Geosci & Infophys, Changsha 410083, Peoples R China	Xing, HF (reprint author), Shandong Normal Univ, Coll Geog & Environm, Jinan 250014, Peoples R China.	xinghanfa@163.com; chenjun@nsdi.gov.cn; zxgcsu@foxmail.com			National Natural Science Foundation of China [41501420, 41371366, 41301442, 41301416]; Pearl River Nova Program of Guangzhou	The work described in this article was supported by the National Natural Science Foundation of China (Grant No: 41501420; 41371366; 41301442; 41301416) and the Pearl River Nova Program of Guangzhou.	Hu H, 2014, SUSTAINABILITY-BASEL, V6, P1896, DOI 10.3390/su6041896; Chi H, 2015, REMOTE SENS-BASEL, V7, P5534, DOI 10.3390/rs70505534; Zhou XG, 2013, INT ARCH PHOTOGRAMM, V40-4-W3, P141, DOI 10.5194/isprsarchives-XL-4-W3-141-2013; Ballatore A, 2013, INT J GEOGR INF SCI, V27, P2099, DOI 10.1080/13658816.2013.790548; Gao Y, 2010, SCI CHINA TECHNOL SC, V53, P52, DOI 10.1007/s11431-010-3208-0; Wang J…	45	0	0	0	0	MDPI AG	BASEL	POSTFACH, CH-4005 BASEL, SWITZERLAND	2220-9964			ISPRS INT GEO-INF	ISPRS Int. Geo-Inf.	SEP	2015	4	3
J	Dorn, H; Tornros, T; Zipf, A				Dorn, Helen; Toernros, Tobias; Zipf, Alexander			Quality Evaluation of VGI Using Authoritative Data-A Comparison with Land Use Data in Southern Germany	ISPRS International Journal of Geo-Information			English	Article						VGI; crowdsourced geoinformation; ATKIS Base DLM; data quality; kappa	BUILDING FOOTPRINTS; GEOSPATIAL DATA; OPENSTREETMAP; INFORMATION; ACCURACY; NETWORK; OSM; CLASSIFICATIONS; COMPLETENESS; AGREEMENT	Volunteered Geographic Information (VGI) such as data derived from the OpenStreetMap (OSM) project is a popular data source for freely available geographic data. Normally, untrained contributors gather these data. This fact is frequently a cause of concern regarding the quality and usability of such data. In this study, the quality of OSM land use and land cover (LULC) data is investigated for an…	[Zipf, Alexander] Heidelberg Univ, Inst Geog, D-69120 Heidelberg, Germany; Heidelberg Univ, Interdisciplinary Ctr Sci Comp IWR, D-69120 Heidelberg, Germany	Zipf, A (reprint author), Heidelberg Univ, Inst Geog, Berliner Str 48, D-69120 Heidelberg, Germany.	helen.dorn@geog.uni-heidelberg.de; tobias.toernros@geog.uni-heidelberg.de; zipf@uni-heidelberg.de			Ministry of Science, Research and the Arts of the State of Baden-Wurttemberg; DFG Excellence Initiative	The study was supported by the Ministry of Science, Research and the Arts of the State of Baden-Wurttemberg, as well as the DFG Excellence Initiative.	Aalders H. J. G. L., 2002, SPATIAL DATA QUALITY, P186; Al-Bakri M., 2010, P 9 INT S SPAT ACC A; Heipke C, 2010, ISPRS J PHOTOGRAMM, V65, P550, DOI 10.1016/j.isprsjprs.2010.06.005; Zielstra D, 2013, T GIS, V17, P315, DOI 10.1111/tgis.12037; Hecht R, 2013, ISPRS INT GEO-INF, V2, P1066, DOI 10.3390/ijgi2041066; Al-Bakri M, 2012, INT J GEOGR INF SCI, V26, P1437, DOI 10.1080/13658816.2011.636012; LAND…	42	0	0	1	1	MDPI AG	BASEL	POSTFACH, CH-4005 BASEL, SWITZERLAND	2220-9964			ISPRS INT GEO-INF	ISPRS Int. Geo-Inf.	SEP	2015	4	3
J	Zhou, XG; Zeng, L; Jiang, Y; Zhou, KX; Zhao, YJ				Zhou, Xiaoguang; Zeng, Lu; Jiang, Yu; Zhou, Kaixuan; Zhao, Yijiang			Dynamically Integrating OSM Data into a Borderland Database	ISPRS International Journal of Geo-Information			English	Article						integration; OSM; model transformation; rule; multi-version; incremental updating	VOLUNTEERED GEOGRAPHIC INFORMATION; OPENSTREETMAP DATASET; BUILDING FOOTPRINTS; QUALITY ASSESSMENT; COMPLETENESS; PERSPECTIVE	Spatial data are fundamental for borderland analyses of geography, natural resources, demography, politics, economy, and culture. As the spatial data used in borderland research usually cover the borderland regions of several neighboring countries, it is difficult for anyone research institution of government to collect them. Volunteered Geographic Information (VGI) is a highly successful method …	[Zhou, Xiaoguang; Zeng, Lu; Jiang, Yu; Zhou, Kaixuan; Zhao, Yijiang] Cent S Univ, Sch Geosci & Infophys, Changsha 410083, Peoples R China	Zhou, XG (reprint author), Cent S Univ, Sch Geosci & Infophys, Changsha 410083, Peoples R China.	zxgcsu@foxmail.com; zenglu@csu.edu.cn; jy419@foxmail.com; zkxcsu@gmail.com; zyriver@163.com			National Science Foundation of China [41371366]; National Key Technology R&D Program of China [2012BAK12B01]	The work described in this paper was supported by National Science Foundation of China under grant No. 41371366, and the National Key Technology R&D Program of China under grant No. 2012BAK12B01.	Tian WW, 2012, INT ARCH PHOTOGRAMM, V39-B4, P445; Hecht R, 2013, ISPRS INT GEO-INF, V2, P1066, DOI 10.3390/ijgi2041066; Jackson SP, 2013, ISPRS INT GEO-INF, V2, P507, DOI 10.3390/ijgi2020507; Bakillah M, 2014, INT J GEOGR INF SCI, V28, P1940, DOI 10.1080/13658816.2014.909045; Hagenauer J, 2012, INT J GEOGR INF SCI, V26, P963, DOI 10.1080/13658816.2011.619501; Nedkov S, 2012, INT ARCH PHOTOGRAMM, …	29	0	0	1	1	MDPI AG	BASEL	POSTFACH, CH-4005 BASEL, SWITZERLAND	2220-9964			ISPRS INT GEO-INF	ISPRS Int. Geo-Inf.	SEP	2015	4	3
J	MacDonald, EA; Case, NA; Clayton, JH; Hall, MK; Heavner, M; Lalone, N; Patel, KG; Tapia, A				MacDonald, E. A.; Case, N. A.; Clayton, J. H.; Hall, M. K.; Heavner, M.; Lalone, N.; Patel, K. G.; Tapia, A.			Aurorasaurus: A citizen science platform for viewing and reporting the aurora	SPACE WEATHER-THE INTERNATIONAL JOURNAL OF RESEARCH AND APPLICATIONS			English	Article						aurora; citizen science; alerts	ARC THICKNESSES; TWITTER; VOLUNTEERS; EARTHQUAKE; PROJECT; MODEL	A new, citizen science-based, aurora observing and reporting platform has been developed with the primary aim of collecting auroral observations made by the general public to further improve the modeling of the aurora. In addition, the real-time ability of this platform facilitates the combination of citizen science observations with auroral oval models to improve auroral visibility nowcasting. A…	[MacDonald, E. A.; Case, N. A.; Heavner, M.; Patel, K. G.] New Mexico Consortium, Los Alamos, NM USA; [MacDonald, E. A.; Case, N. A.; Patel, K. G.] NASA Goddard Space Flight Ctr, Greenbelt, MD USA; [Clayton, J. H.; Hall, M. K.] Sci Educ Solut, Los Alamos, NM USA; [Heavner, M.] Los Alamos Natl Lab, Los Alamos, NM USA; [Lalone, N.; Tapia, A.] Penn State Univ, Coll Informat Sci & Technol, University…	MacDonald, EA (reprint author), New Mexico Consortium, Los Alamos, NM USA.	e.a.macdonald@nasa.gov		Case, Nathan/0000-0003-0692-1778	National Science Foundation (NSF) [1344296]; Los Alamos National Laboratory's Institute for Geophysics and Planetary Physics (IGPP); Laboratory Directed R&D under the Van Allen Probes; Laboratory Directed R&D under the NASA Goddard	This material is based upon the work supported, in part, by the National Science Foundation (NSF) under grant 1344296. Any opinions, findings, and conclusions or recommendations expressed in this material are those of the author(s) and do not necessarily reflect the views of NSF. Additional support has been provided by strategic investments by Los Alamos National Laboratory's Institute for Geophy…	Akasofu S.-I., 2015, EOS EARTH SPACE SCI, P96, DOI [10.1029/2015EO027907, DOI 10.1029/2015EO027907]; Trumbull DJ, 2000, SCI EDUC, V84, P265, DOI 10.1002/(SICI)1098-237X(200003)84:2<265::AID-SCE7>3.0.CO;2-5; Kelling S, 2009, BIOSCIENCE, V59, P613, DOI 10.1525/bio.2009.59.7.12; Newell PT, 2014, SPACE WEATHER, V12, P368, DOI 10.1002/2014SW001056; Baker DN, 2013, SPACE WEATHER, V11, P585, DOI 10.1002…	57	0	0	2	2	AMER GEOPHYSICAL UNION	WASHINGTON	2000 FLORIDA AVE NW, WASHINGTON, DC 20009 USA	1542-7390			SPACE WEATHER	Space Weather	SEP	2015	13	9
J	Park, S; Bang, Y; Yu, K				Park, Seula; Bang, Yoonsik; Yu, Kiyun			Techniques for Updating Pedestrian Network Data Including Facilities and Obstructions Information for Transportation of Vulnerable People	SENSORS			English	Article						pedestrian navigation service; transportation of vulnerable people; pedestrian network data; volunteered geographic information; facilities and obstructions	MAP-MATCHING ALGORITHM; WHEELCHAIR NAVIGATION	Demand for a Pedestrian Navigation Service (PNS) is on the rise. To provide a PNS for the transportation of vulnerable people, more detailed information of pedestrian facilities and obstructions should be included in Pedestrian Network Data (PND) used for PNS. Such data can be constructed efficiently by collecting GPS trajectories and integrating them with the existing PND. However, these two kin…	[Park, Seula] Samsung SDS, Seoul 05510, South Korea; [Bang, Yoonsik; Yu, Kiyun] Seoul Natl Univ, Dept Civil & Environm Engn, Seoul 08826, South Korea	Yu, K (reprint author), Seoul Natl Univ, Dept Civil & Environm Engn, 1 Gwanak ro, Seoul 08826, South Korea.	seula9002@gmail.com; bangys1004@snu.ac.kr; kiyun@snu.ac.kr			ICT R&D program of MSIP/IITP [B0101-15-1349]	This work was supported by the ICT R&D program of MSIP/IITP (B0101-15-1349, Development of Volunteered Geospatial Information Platform Technology and Application for the Elderly and Disabled).	Kasemsuppakorn P, 2013, TRANSPORT RES C-EMER, V26, P285, DOI 10.1016/j.trc.2012.09.007; Ekpenyong F, 2009, NEUROCOMPUTING, V73, P24, DOI 10.1016/j.neucom.2008.11.032; Liu YF, 2009, THIRD INTERNATIONAL CONFERENCE ON MULTIMEDIA AND UBIQUITOUS ENGINEERING (MUE 2009), P465, DOI 10.1109/MUE.2009.82; Ren M, 2012, J NAVIGATION, V65, P617, DOI 10.1017/S0373463312000252; Ren M, 2009, T GIS, V13, P197, DOI…	20	0	0	2	2	MDPI AG	BASEL	POSTFACH, CH-4005 BASEL, SWITZERLAND	1424-8220			SENSORS-BASEL	Sensors	SEP	2015	15	9
J	Balkwill, F; Chambers, K				Balkwill, Frances; Chambers, Katie			Centre of the Cell: Science Comes to Life	PLOS BIOLOGY			English	Editorial Material								Centre of the Cell is a unique biomedical science education centre, a widening participation and outreach project in London's East End. This article describes Centre of the Cell's first five years of operation, the evolution of the project in response to audience demand, and the impact of siting a major public engagement project within a research laboratory.	[Balkwill, Frances; Chambers, Katie] Queen Mary Univ London, Ctr Cell, London, England; [Balkwill, Frances] Queen Mary Univ London, Barts Canc Inst, Ctr Canc & Inflammat, London, England	Balkwill, F (reprint author), Queen Mary Univ London, Ctr Cell, London, England.	f.balkwill@qmul.ac.uk						0	0	0	2	2	PUBLIC LIBRARY SCIENCE	SAN FRANCISCO	1160 BATTERY STREET, STE 100, SAN FRANCISCO, CA 94111 USA	1545-7885			PLOS BIOL	PLoS. Biol.	SEP	2015	13	9
J	Howard, E; Davis, AK				Howard, Elizabeth; Davis, Andrew K.			Investigating Long-Term Changes in the Spring Migration of Monarch Butterflies (Lepidoptera: Nymphalidae) Using 18 Years of Data From Journey North, a Citizen Science Program	ANNALS OF THE ENTOMOLOGICAL SOCIETY OF AMERICA			English	Article						monarch butterfly; Danaus plexippus; Danainae; spring migration; Journey North	MEXICO	Declines in overwintering colonies of monarch butterflies ( Danaus plexxipus) in Mexico raise questions about other life cycle phases, such as spring migration, where monarchs recolonize their breeding range in the United States and Canada with sequential generations. We used data from a longterm citizen science program, "Journey North" ( now with 18 yr), to identify possible changes to the recol…	[Howard, Elizabeth] Journey North, Norwich, VT 05055 USA; [Davis, Andrew K.] Univ Georgia, Odum Sch Ecol, Athens, GA 30602 USA	Davis, AK (reprint author), Univ Georgia, Odum Sch Ecol, Athens, GA 30602 USA.	akdavis@uga.edu			Annenberg Foundation	We thank the thousands of volunteers who contributed their observations to Journey North over the years. We are grateful to Lincoln Brower, who has provided a great deal of advice on monarch biology over many years, and we also thank Cindy Schmid, who is the data management coordinator for the program. Journey North is funded with support from the Annenberg Foundation. Finally, we thank Dara Satt…	Howard E, 2011, J LEPID SOC, V65, P267; SVARD L, 1988, BEHAV ECOL SOCIOBIOL, V23, P39, DOI 10.1007/BF00303056; Ries L, 2015, BIOSCIENCE, V65, P419, DOI 10.1093/biosci/biv011; Brower LP, 2012, INSECT CONSERV DIVER, V5, P95, DOI 10.1111/j.1752-4598.2011.00142.x; Cockrell BJ, 1993, BIOL CONSERVATION MO, V38, P233; Davis Andrew K., 2005, Journal of the Lepidopterists' Society, V59, P1; De Anda A., 20…	10	0	0	15	15	OXFORD UNIV PRESS INC	CARY	JOURNALS DEPT, 2001 EVANS RD, CARY, NC 27513 USA	0013-8746	1938-2901		ANN ENTOMOL SOC AM	Ann. Entomol. Soc. Am.	SEP	2015	108	5
J	Stenoien, C; Nail, KR; Oberhauser, KS				Stenoien, Carl; Nail, Kelly R.; Oberhauser, Karen S.			Habitat Productivity and Temporal Patterns of Monarch Butterfly Egg Densities in the Eastern United States	ANNALS OF THE ENTOMOLOGICAL SOCIETY OF AMERICA			English	Article						Danaus plexippus; population ecology; habitat management; citizen science	DANAUS-PLEXIPPUS L; REPRODUCTIVE DIAPAUSE; LEPIDOPTERA; MEXICO; DISPERSAL; MILKWEED; DYNAMICS; COLONIES; LARVAE	There is compelling evidence that numbers of eastern North American monarchs are declining, as documented by the area they occupy in their Mexican overwintering grounds. Decreasing availability of breeding habitat has been implicated in this decline. However, it is difficult to document population size during the breeding phase of the annual cycle because monarchs are dispersed over a large area,…	[Stenoien, Carl] Univ Minnesota, Dept Ecol Evolut & Behav, St Paul, MN 55108 USA; [Nail, Kelly R.] Univ Minnesota, Conservat Biol Grad Program, St Paul, MN 55108 USA; [Oberhauser, Karen S.] Univ Minnesota, Dept Fisheries Wildlife & Conservat Biol, St Paul, MN 55108 USA	Stenoien, C (reprint author), Univ Minnesota, Dept Ecol Evolut & Behav, 100 Ecol Bldg,1987 Upper Buford Circle, St Paul, MN 55108 USA.	sten0364@umn.edu			National Science Foundation [BCS0003920, NSF ESI 9731429, ESI-0104600, ISE 0917450]; Xerces Society	We thank all of the MLMP volunteers who have contributed to this research, in particular, Susan Jamison, Pete and Sanny Oberhauser, Gayle Steffy, Mary Bishop Kennedy, Susan Payant, Cindy Petersen, Barbara Powers, and Sharon Duerkop, who have all monitored for 15 or more years and have made important contributions to monarch conservation in their locations. We are also grateful for the long-term i…	Ries L, 2001, J ANIM ECOL, V70, P840, DOI 10.1046/j.0021-8790.2001.00546.x; Merckx T, 2007, ANIM BEHAV, V74, P1029, DOI 10.1016/j.anbehav.2006.12.020; ZALUCKI MP, 1982, BEHAVIOUR, V80, P174, DOI 10.1163/156853982X00346; HERMAN WS, 1981, BIOL BULL, V160, P89, DOI 10.2307/1540903; Satterfield DA, 2015, P ROY SOC B-BIOL SCI, V282, DOI 10.1098/rspb.2014.1734; Baum KA, 2012, BIOL LETTERS, V8, P968, DO…	41	0	0	18	18	OXFORD UNIV PRESS INC	CARY	JOURNALS DEPT, 2001 EVANS RD, CARY, NC 27513 USA	0013-8746	1938-2901		ANN ENTOMOL SOC AM	Ann. Entomol. Soc. Am.	SEP	2015	108	5
J	Nail, KR; Stenoien, C; Oberhauser, KS				Nail, Kelly R.; Stenoien, Carl; Oberhauser, Karen S.			Immature Monarch Survival: Effects of Site Characteristics, Density, and Time	ANNALS OF THE ENTOMOLOGICAL SOCIETY OF AMERICA			English	Article						Danaus plexippus; monarch; Lepidoptera; habitat; survival	BUTTERFLIES DANAUS-PLEXIPPUS; POPULATION-CYCLES; LEPIDOPTERA; PARASITISM; DANAIDAE; GROWTH; MEXICO; LATEX; LANDSCAPE; FECUNDITY	The eastern North American monarch population is declining, as evidenced by the area occupied by overwintering adults. Recently, decreasing availability of breeding habitat has been most strongly implicated in this decline. An alternative, nonexclusive explanation for the recent population decline is decreasing survival. We used 18 yr of data from the Monarch Larva Monitoring Project, a citizen s…	[Nail, Kelly R.] Univ Minnesota, Conservat Biol Grad Program, St Paul, MN 55108 USA; [Stenoien, Carl] Univ Minnesota, Dept Ecol Evolut & Behav, St Paul, MN 55108 USA; [Oberhauser, Karen S.] Univ Minnesota, Dept Fisheries Wildlife & Conservat Biol, St Paul, MN 55108 USA	Nail, KR (reprint author), Univ Minnesota, Conservat Biol Grad Program, 135 Skok Hall,2003 Upper Buford Circle, St Paul, MN 55108 USA.	nail@umn.edu			National Science Foundation [NSF ESI 9731429, ESI-0104600, ISE 0917450]; Xerces Society; NSF [00039202]	We thank the many dedicated citizen scientists who have gathered data for the MLMP, especially Gayle Steffy, Brenda Keith, Deb Marcinski, Sanny Oberhauser, Valerie Evanson, Charlie Cameron, and Ilse Gebhard, who have all reared >600 monarchs for the survival study. We appreciate the assistance received at the outset of this project from Todd Arnold and statistical help from Sarah Saunders. We als…	Vidal O, 2014, CONSERV BIOL, V28, P177, DOI 10.1111/cobi.12138; Oberhauser KS, 2009, J AM MOSQUITO CONTR, V25, P83, DOI 10.2987/08-5788.1; Satterfield DA, 2015, P ROY SOC B-BIOL SCI, V282, DOI 10.1098/rspb.2014.1734; Turchin P, 1999, SCIENCE, V285, P1068, DOI 10.1126/science.285.5430.1068; OBERHAUSER KS, 1989, BEHAV ECOL SOCIOBIOL, V25, P237, DOI 10.1007/BF00300049; BIRCH LC, 1957, COLD SPRING HA…	52	0	0	6	6	OXFORD UNIV PRESS INC	CARY	JOURNALS DEPT, 2001 EVANS RD, CARY, NC 27513 USA	0013-8746	1938-2901		ANN ENTOMOL SOC AM	Ann. Entomol. Soc. Am.	SEP	2015	108	5
J	Stauffacher, M; Muggli, N; Scolobig, A; Moser, C				Stauffacher, Michael; Muggli, Nora; Scolobig, Anna; Moser, Corinne			Framing deep geothermal energy in mass media: the case of Switzerland	TECHNOLOGICAL FORECASTING AND SOCIAL CHANGE			English	Article						Deep geothermal energy; Media analysis; Arguments; Framing; Public opinion; Switzerland	NUCLEAR-WASTE REPOSITORIES; PUBLIC PERCEPTIONS; CARBON CAPTURE; CLIMATE-CHANGE; TECHNOLOGIES; OPINION; COMMUNICATION; ACCEPTANCE; POWER; RISK	Geothermal energy is an essential component for the successful decarbonization of the global energy supply. Its success will depend both on technological progress and on public reaction to this technology. The goal of this study is to analyze how deep geothermal energy has been discussed in the mass media in Switzerland, with an emphasis on the actors, as well as on the arguments and frames they …	[Stauffacher, Michael; Muggli, Nora; Moser, Corinne] Swiss Fed Inst Technol, NSSI, Zurich, Switzerland; [Stauffacher, Michael] Swiss Fed Inst Technol, Transdisciplinar Lab TdLab, Zurich, Switzerland; [Scolobig, Anna] Swiss Fed Inst Technol, Climate Policy CP, Zurich, Switzerland; [Moser, Corinne] Zurich Univ Appl Sci ZHAW, Inst Sustainable Dev INE, Winterthur, Switzerland	Stauffacher, M (reprint author), Swiss Fed Inst Technol, Dept Environm Syst Sci D USYS, Transdisciplinar Lab TdLab, Sonneggstr 33,SOL F5, CH-8092 Zurich, Switzerland.	michael.stauffacher@env.ethz.ch	Stauffacher, Michael/A-1504-2009	Stauffacher, Michael/0000-0001-9724-6741	Competence Center Environment and Sustainability (CCES) of ETH Domain; Competence Center Energy and Mobility (CCEM) of ETH Domain	This research was made possible by the Geotherm<SUP>2</SUP> project, co-financed by the Competence Centers Environment and Sustainability (CCES) and Energy and Mobility (CCEM) of the ETH Domain.	Mulder K, 2012, TECHNOL FORECAST SOC, V79, P1513, DOI 10.1016/j.techfore.2012.04.018; Scheufele DA, 1999, J COMMUN, V49, P103, DOI 10.1111/j.1460-2466.1999.tb02784.x; Scheufele DA, 2007, J COMMUN, V57, P9, DOI 10.1111/j.1460-2466.2006.00326.x; Stephens JC, 2009, ENVIRON COMMUN, V3, P168, DOI 10.1080/17524030902916640; Bauer MW, 2005, INT J PUBLIC OPIN R, V17, P5, DOI 10.1093/ijpor/edh054; Andsage…	72	0	0	3	3	ELSEVIER SCIENCE INC	NEW YORK	360 PARK AVE SOUTH, NEW YORK, NY 10010-1710 USA	0040-1625	1873-5509		TECHNOL FORECAST SOC	Technol. Forecast. Soc. Chang.	SEP	2015	98
J	See, L; Fritz, S; Perger, C; Schill, C; McCallum, I; Schepaschenko, D; Duerauer, M; Sturn, T; Kamer, M; Kraxner, F; Obersteiner, M				See, Linda; Fritz, Steffen; Perger, Christoph; Schill, Christian; McCallum, Ian; Schepaschenko, Dmitry; Duerauer, Martina; Sturn, Tobias; Kamer, Mathias; Kraxner, Florian; Obersteiner, Michael			Harnessing the power of volunteers, the internet and Google Earth to collect and validate global spatial information using Geo-Wiki	TECHNOLOGICAL FORECASTING AND SOCIAL CHANGE			English	Article						Land cover; Land use; Crowdsourcing; Volunteered geographic information; Validation	LAND-COVER DATASETS; GEOGRAPHIC INFORMATION	Information about land cover and land use is needed for a wide range of applications such as nature protection and biodiversity, forest and water management, urban and transport planning, natural hazard prevention and mitigation, monitoring of agricultural policies and economic land use modelling. A number of different remotely-sensed global land cover products are available but studies have show…	[See, Linda; Fritz, Steffen; Perger, Christoph; McCallum, Ian; Schepaschenko, Dmitry; Duerauer, Martina; Sturn, Tobias; Kamer, Mathias; Kraxner, Florian; Obersteiner, Michael] Int Inst Appl Syst Anal, A-2361 Laxenburg, Austria; [Schill, Christian] Univ Freiburg, D-79106 Freiburg, Germany	See, L (reprint author), Int Inst Appl Syst Anal, A-2361 Laxenburg, Austria.	see@iiasa.ac.at			International Food Policy Research Institute (IFPRI); International Institute on Livestock Research (ILRI); CGIAR Research Program on Climate Change, Agriculture and Food Security (CCAFS); EU FP7 [283080, 603719, 612755, 617754]	This research was supported by the International Food Policy Research Institute (IFPRI), the International Institute on Livestock Research (ILRI), the CGIAR Research Program on Climate Change, Agriculture and Food Security (CCAFS), and the EU FP7 funded GEOCARBON (No. 283080), SIGMA (No. 603719), AGRICISTRADE (612755) and ERC CrowdLand (No. 617754) projects.	Fairbairn D, 2013, ISPRS INT GEO-INF, V2, P349, DOI 10.3390/ijgi2020349; Albrecht F., 2013, C P GI FOR 2013 CREA, P100, DOI [http://dx.doi.org/10.1553/giscience2013s100, DOI 10.1553/GISCIENCE2013S100]; Friedl MA, 2010, REMOTE SENS ENVIRON, V114, P168, DOI 10.1016/j.rse.2009.08.016; Clark ML, 2011, REMOTE SENS-BASEL, V3, P601, DOI 10.3390/rs3030601; Bastin L, 2013, ECOL INFORM, V14, P9, DOI 10.101…	41	0	0	5	5	ELSEVIER SCIENCE INC	NEW YORK	360 PARK AVE SOUTH, NEW YORK, NY 10010-1710 USA	0040-1625	1873-5509		TECHNOL FORECAST SOC	Technol. Forecast. Soc. Chang.	SEP	2015	98
J	Nelson, G; Sweeney, P; Wallace, LE; Rabeler, RK; Allarrd, D; Brown, H; Carter, JR; Denslow, MW; Ellwood, ER; Germain-Aubrey, CC; Gilbert, E; Gillespie, E; Goertzen, LR; Legler, B; Marchant, DB; Marsico, TD; Morris, AB; Murrell, Z; Nazaire, M; Neefus, C; Oberreiter, S; Paul, D; Ruhfel, BR; Sasek, T; Shaw, J; Soltis, PS; Watson, K; Weeks, A; Mast, AR				Nelson, Gil; Sweeney, Patrick; Wallace, Lisa E.; Rabeler, Richard K.; Allarrd, Dorothy; Brown, Herrick; Carter, J. Richard; Denslow, Michael W.; Ellwood, Elizabeth R.; Germain-Aubrey, Charlotte C.; Gilbert, Ed; Gillespie, Emily; Goertzen, Leslie R.; Legler, Ben; Marchant, D. Blaine; Marsico, Travis D.; Morris, Ashley B.; Murrell, Zack; Nazaire, Mare; Neefus, Chris; Oberreiter, Shana; Paul, Debora…			DIGITIZATION WORKFLOWS FOR FLAT SHEETS AND PACKETS OF PLANTS, ALGAE, AND FUNGI	APPLICATIONS IN PLANT SCIENCES			English	Review						citizen science; digital imaging; digitization; herbarium; specimen database; workflow	NATURAL-HISTORY COLLECTIONS; HERBARIUM SPECIMENS; CLIMATE-CHANGE; UNLOCKING	Effective workflows are essential components in the digitization of biodiversity specimen collections. To date, no comprehensive, community-vetted workflows have been published for digitizing flat sheets and packets of plants, algae, and fungi, even though latest estimates suggest that only 33% of herbarium specimens have been digitally transcribed, 54% of herbaria use a specimen database, and 24…	[Nelson, Gil] Florida State Univ, Integrated Digitized Biocollect iDigBio, Tallahassee, FL 32306 USA; [Sweeney, Patrick; Paul, Deborah] Yale Univ, Peabody Museum Nat Hist, New Haven, CT USA; [Wallace, Lisa E.] Mississippi State Univ, Dept Biol Sci, Mississippi State, MS 39762 USA; [Rabeler, Richard K.] Univ Michigan, Herbarium EEB, Ann Arbor, MI 48109 USA; [Allarrd, Dorothy] Univ Vermont, Dept Pl…	Nelson, G (reprint author), Florida State Univ, Integrated Digitized Biocollect iDigBio, Tallahassee, FL 32306 USA.	gnelson@bio.fsu.edu			National Science Foundation [EF-1115210]	The authors thank the herbarium digitization efforts with which the authors are associated (Box 2) and previous work of iDigBio's Flat Sheets and Packets Digitization Working Group. This material is based on work supported by the National Science Foundation under Cooperative Agreement no. EF-1115210. Any opinions, findings, and conclusions or recommendations expressed in this material are those o…	Haston E, 2012, ZOOKEYS, P93, DOI 10.3897/zookeys.209.3121; Schuh RT, 2012, ZOOKEYS, P255, DOI 10.3897/zookeys.209.3288; Blagoderov V, 2012, ZOOKEYS, P133, DOI 10.3897/zookeys.209.3178; Ellwood ER, 2015, BIOSCIENCE, V65, P383, DOI 10.1093/biosci/biv005; Tulig M, 2012, ZOOKEYS, P103, DOI 10.3897/zookeys.209.3125; Soltis PS, 2014, PHILOS T R SOC B, V369, DOI 10.1098/rstb.2013.0351; Casas-Marce M, 2…	42	0	0	2	2	BOTANICAL SOC AMER INC	ST LOUIS	PO BOX 299, ST LOUIS, MO 63166-0299 USA	2168-0450			APPL PLANT SCI	Appl. Plant Sci.	SEP	2015	3	9
J	Massad, I; Dalyot, S				Massad, I.; Dalyot, S.			Towards the production of digital terrain models from volunteered GPS trajectories	SURVEY REVIEW			English	Article						Crowdsourcing; Digital Terrain Modelling; VGI; Kalman filter; GPS	ASSISTED GPS; OPENSTREETMAP; ACCURACY	There currently exists a wide variety of online resources providing mapping infrastructures and geographic information. Most web-based map services, such as Google Maps, Yahoo! Maps and Bing Maps, are mostly based on data that is collected by authoritative mapping agencies. Alternatively, some relatively new web-map services, such as OpenStreetMap (OSM) and Wikimapia, are mostly based on voluntee…	[Massad, I.; Dalyot, S.] Technion Israel Inst Technol, Haifa, Israel	Dalyot, S (reprint author), Technion Israel Inst Technol, Haifa, Israel.	dalyot@tx.technion.ac.il					Girres JF, 2010, T GIS, V14, P435, DOI 10.1111/j.1467-9671.2010.01203.x; Haklay M, 2010, ENVIRON PLANN B, V37, P682, DOI 10.1068/b35097; Nelson A, 2009, DEV SOIL SCI, V33, P65, DOI 10.1016/S0166-2481(08)00003-2; Zandbergen PA, 2011, J NAVIGATION, V64, P381, DOI 10.1017/S0373463311000051; Hodgson ME, 2005, PHOTOGRAMM ENG REM S, V71, P817; Wilson JP, 2012, GEOMORPHOLOGY, V137, P107, DOI 10.1016/j.g…	18	0	0	5	5	MANEY PUBLISHING	LEEDS	STE 1C, JOSEPHS WELL, HANOVER WALK, LEEDS LS3 1AB, W YORKS, ENGLAND	0039-6265	1752-2706		SURV REV	Surv. Rev.	SEP	2015	47	344
J	Basiouka, S; Potsiou, C; Bakogiannis, E				Basiouka, S.; Potsiou, C.; Bakogiannis, E.			OpenStreetMap for cadastral purposes: an application using VGI for official processes in urban areas	SURVEY REVIEW			English	Article						VGI; Crowdsourcing; OpenStreetMap; Cadastre; Land management and administration		The scope of the paper is to test if the online dynamic maps such as the OpenStreetMap (OSM) can be used for official mapping projects such as Cadastre, to investigate the advantages and the concerns of online and open to the public procedures and to identify those differentiations between experts and amateurs that play a critical role in such official projects. The specific research is focused o…	[Basiouka, S.; Potsiou, C.; Bakogiannis, E.] Natl Tech Univ Athens, Sch Rural & Surveying Engn, GR-10682 Athens, Greece	Basiouka, S (reprint author), Natl Tech Univ Athens, Sch Rural & Surveying Engn, GR-10682 Athens, Greece.	s.basiouka@gmail.com					Basiouka S, 2012, SURV REV, V44, P153, DOI 10.1179/1752270611Y.0000000037; Haklay MM, 2003, INT J GEOGR INF SCI, V17, P577, DOI 10.1080/1365881031000114107; Navratil G, 2013, INT ARCH PHOTOGRAMM, V40-2, P159; Talen E, 2000, J AM PLANN ASSOC, V66, P279, DOI 10.1080/01944360008976107; Basiouka S., 2012, COORDINATES MAGA OCT, VVIII; Brown J, 2001, ONLINE COMMUNITIES C, P33; Cartwright W, 2003, MAPS …	26	0	0	5	5	MANEY PUBLISHING	LEEDS	STE 1C, JOSEPHS WELL, HANOVER WALK, LEEDS LS3 1AB, W YORKS, ENGLAND	0039-6265	1752-2706		SURV REV	Surv. Rev.	SEP	2015	47	344
J	Dror, T; Dalyot, S; Doytsher, Y				Dror, T.; Dalyot, S.; Doytsher, Y.			Quantitative evaluation of volunteered geographic information paradigms: social location-based services case study	SURVEY REVIEW			English	Article						Crowdsourcing; Wisdom of the crowd; Social location-based services	OPENSTREETMAP	As of 2010, 90% of the data that existed in the world were created within the previous 2 years, while personal location data have been singled out as one of the five primary 'big data' streams in the 2011 McKinsey report. By 2020, the volume of existing data will increase by 50-fold, where a large percentage of this volume will be associated with geospatial data. One of the reasons for this is th…	[Dror, T.; Dalyot, S.; Doytsher, Y.] Technion Israel Inst Technol, Mapping & Geoinformat Engn, Haifa, Israel	Dalyot, S (reprint author), Technion Israel Inst Technol, Mapping & Geoinformat Engn, Haifa, Israel.	dalyot@tx.technion.ac.il					Alonso O., 2011, P 4 ACM INT C WEB SE, P1, DOI 10.1145/1935826.1935831; Zhao YX, 2014, INFORM SYST FRONT, V16, P417, DOI 10.1007/s10796-012-9350-4; Huberman BA, 2009, J INF SCI, V35, P758, DOI 10.1177/0165551509346786; Estelles-Arolas E, 2012, J INF SCI, V38, P189, DOI 10.1177/0165551512437638; Vukovic M, 2009, 2009 IEEE CONGRESS ON SERVICES (SERVICES-1 2009), VOLS 1 AND 2, P686, DOI 10.1109/SERV…	25	0	0	11	11	MANEY PUBLISHING	LEEDS	STE 1C, JOSEPHS WELL, HANOVER WALK, LEEDS LS3 1AB, W YORKS, ENGLAND	0039-6265	1752-2706		SURV REV	Surv. Rev.	SEP	2015	47	344
J	Peron, G; Altwegg, R				Peron, Guillaume; Altwegg, Res			Twenty-five years of change in southern African passerine diversity: nonclimatic factors of change	GLOBAL CHANGE BIOLOGY			English	Article						biodiversity; bush encroachment; citizen science; climate change; conservation planning; occupancy models; pesticide accumulation; South Africa; species richness	CLIMATE-CHANGE; LAND-USE; SPECIES DISTRIBUTIONS; OCCUPANCY MODELS; CITIZEN SCIENCE; RANGE DYNAMICS; ATLAS DATA; BIRDS; CONSEQUENCES; COMMUNITIES	We analysed more than 25 years of change in passerine bird distribution in South Africa, Swaziland and Lesotho, to show that species distributions can be influenced by processes that are at least in part independent of the local strength and direction of climate change: land use and ecological succession. We used occupancy models that separate species' detection from species' occupancy probabilit…	[Peron, Guillaume; Altwegg, Res] Univ Cape Town, Dept Stat Sci, ZA-7701 Cape Town, South Africa; [Altwegg, Res] Univ Cape Town, African Climate & Dev Initiat, ZA-7701 Cape Town, South Africa	Peron, G (reprint author), Univ Cape Town, Dept Stat Sci, ZA-7701 Cape Town, South Africa.	peron_guillaume@yahoo.fr			SANBI; National Research Foundation of South Africa [85802]	We thank the volunteer atlasers who collected the data and the Animal Demography Unit at University of Cape Town for making the data available to us. C. Beale, F. Bled, G. Duckworth, D. Guo, B. Huntley, S. Mecenero and Statistics South Africa helped with covariate data access and formatting. This work was funded by SANBI and by the National Research Foundation of South Africa (Grant 85802). The N…	Altwegg R, 2008, BIOL LETTERS, V4, P581, DOI 10.1098/rsbl.2008.0051; Thuiller W, 2004, J BIOGEOGR, V31, P353; Beale CM, 2008, P NATL ACAD SCI USA, V105, P14908, DOI 10.1073/pnas.0803506105; Scheffer M, 2003, TRENDS ECOL EVOL, V18, P648, DOI 10.1016/j.tree.2003.09.002; Royle JA, 2003, ECOLOGY, V84, P777, DOI 10.1890/0012-9658(2003)084[0777:EAFRPA]2.0.CO;2; Hart JD, 2006, J APPL ECOL, V43, P81, DOI…	40	1	1	9	9	WILEY-BLACKWELL	HOBOKEN	111 RIVER ST, HOBOKEN 07030-5774, NJ USA	1354-1013	1365-2486		GLOBAL CHANGE BIOL	Glob. Change Biol.	SEP	2015	21	9
J	Muller, CL; Chapman, L; Johnston, S; Kidd, C; Illingworth, S; Foody, G; Overeem, A; Leigh, RR				Muller, C. L.; Chapman, L.; Johnston, S.; Kidd, C.; Illingworth, S.; Foody, G.; Overeem, A.; Leigh, R. R.			Crowdsourcing for climate and atmospheric sciences: current status and future potential	INTERNATIONAL JOURNAL OF CLIMATOLOGY			English	Review						Internet of things; Big data; Citizen science; Sensors; Amateur; Applications	VOLUNTEERED GEOGRAPHIC INFORMATION; URBAN METEOROLOGICAL NETWORKS; CITIZEN-SCIENCE; RAIN GAUGES; COMMUNICATION-NETWORKS; PRESSURE OBSERVATIONS; MOVING CARS; HEAT-ISLAND; QUALITY; TEMPERATURE	Crowdsourcing is traditionally defined as obtaining data or information by enlisting the services of a (potentially large) number of people. However, due to recent innovations, this definition can now be expanded to include and/or from a range of public sensors, typically connected via the Internet.' A large and increasing amount of data is now being obtained from a huge variety of non-traditiona…	[Muller, C. L.; Chapman, L.] Univ Birmingham, Sch Geog Earth & Environm Sci, Birmingham B15 2TT, W Midlands, England; [Johnston, S.] OpenSignal, London, England; [Kidd, C.] Univ Maryland, Earth Syst Sci Interdisciplinary Ctr, Baltimore, MD USA; [Kidd, C.] NASA, Goddard Space Flight Ctr, Greenbelt, MD 20771 USA; [Illingworth, S.] Manchester Metropolitan Univ, Sch Res Enterprise & Innovat, Manchest…	Muller, CL (reprint author), Univ Birmingham, Sch Geog Earth & Environm Sci, Birmingham B15 2TT, W Midlands, England.	c.l.muller@bham.ac.uk	Chapman, Lee/F-4674-2014; Illingworth, Samuel/A-4899-2015	Chapman, Lee/0000-0002-2837-8334; Illingworth, Samuel/0000-0003-2551-0675	UK Natural Environmental Research Council (NERC) [NE/I006915/1, NE/I029293/1]; Netherlands Technology Foundation STW [11944]; UK NERC National Centre for Earth Observation (NCEO); Open Knowledge Foundation Panton Fellowship	The authors would like to thank the UK Natural Environmental Research Council (NERC) for funding Dr Catherine Muller (NE/I006915/1), Dr Lee Chapman (NE/I006915/1), and Dr Illingworth (NE/I029293/1); The Netherlands Technology Foundation STW for supporting Dr Aart Overeem (project 11944); The UK NERC National Centre for Earth Observation (NCEO) for supporting Dr Rosemarie Graves, who also holds an…	Aberer K, 2010, P ACM SIGSPATIAL INT; Aginova, 2011, ICL US GUID; Aguera-Perez A, 2014, J WIND ENG IND AEROD, V127, P51, DOI [10.1016/j.jweia.2014.02.006, 10.1016/jjweia.2014.02.006]; AirQualityEgg, 2014, DATA QUALITY; Amazon, 2013, AM PRIM AIR; Heipke C, 2010, ISPRS J PHOTOGRAMM, V65, P550, DOI 10.1016/j.isprsjprs.2010.06.005; Lorenz C, 2012, J HYDROMETEOROL, V13, P1397, DOI 10.1175/JHM-D-11-088…	135	1	1	30	30	WILEY-BLACKWELL	HOBOKEN	111 RIVER ST, HOBOKEN 07030-5774, NJ USA	0899-8418	1097-0088		INT J CLIMATOL	Int. J. Climatol.	SEP	2015	35	11
J	Geach, JE; More, A; Verma, A; Marshall, PJ; Jackson, N; Belles, PE; Beswick, R; Baeten, E; Chavez, M; Cornen, C; Cox, BE; Erben, T; Erickson, NJ; Garrington, S; Harrison, PA; Harrington, K; Hughes, DH; Ivison, RJ; Jordan, C; Lin, YT; Leauthaud, A; Lintott, C; Lynn, S; Kapadia, A; Kneib, JP; Macmillan, C; Makler, M; Miller, G; Montana, A; Mujica, R; Muxlow, T; Narayanan, G; Briain, DO; O'Brien, T;…				Geach, J. E.; More, A.; Verma, A.; Marshall, P. J.; Jackson, N.; Belles, P. -E.; Beswick, R.; Baeten, E.; Chavez, M.; Cornen, C.; Cox, B. E.; Erben, T.; Erickson, N. J.; Garrington, S.; Harrison, P. A.; Harrington, K.; Hughes, D. H.; Ivison, R. J.; Jordan, C.; Lin, Y. -T.; Leauthaud, A.; Lintott, C.; Lynn, S.; Kapadia, A.; Kneib, J. -P.; Macmillan, C.; Makler, M.; Miller, G.; Montana, A.; Mujica,…			The Red Radio Ring: a gravitationally lensed hyperluminous infrared radio galaxy at z=2.553 discovered through the citizen science project SPACE WARPS	MONTHLY NOTICES OF THE ROYAL ASTRONOMICAL SOCIETY			English	Article						methods: miscellaneous; galaxies: high-redshift	STAR-FORMING GALAXY; AUTOMATED DETECTION; HIGH-RESOLUTION; STELLAR MASS; IMAGING DATA; STRIPE 82; REDSHIFT; GHZ; TELESCOPE; REDUCTION	We report the discovery of a gravitationally lensed hyperluminous infrared galaxy (intrinsic L-IR approximate to 10(13) L-circle dot) with strong radio emission (intrinsic L-1.4 GHz approximate to 10(25) WHz(-1)) at z = 2.553. The source was identified in the citizen science project SPACE WARPS through the visual inspection of tens of thousands of iJK(s) colour composite images of luminous red ga…	[Geach, J. E.] Univ Hertfordshire, Sci & Technol Res Inst, Ctr Astrophys Res, Hatfield AL10 9AB, Herts, England; [More, A.] Univ Tokyo, Kavli Inst Phys & Math Universe, Kashiwa, Chiba 2778582, Japan; [Verma, A.] Oxford Astrophys, Oxford OX1 3RH, England; [Marshall, P. J.] Kavli Inst Particle Astrophys & Cosmol, Stanford, CA 94309 USA; [Jackson, N.] Univ Manchester, Sch Phys & Astron, E MERLIN Jod…	Geach, JE (reprint author), Univ Hertfordshire, Sci & Technol Res Inst, Ctr Astrophys Res, Hatfield AL10 9AB, Herts, England.	j.geach@herts.ac.uk			Royal Society University Research Fellowship; World Premier International Research Center Initiative (WPIInitiative), MEXT, Japan; Japan Society for Promotion of Science (JSPS); Leverhulme Trust; European Research Council [321302]; ERC LIDA; CNRS; CNPq; FAPERJ; Canada Foundation for Innovation; National Aeronautics and Space Administration; US National Science Foundation via University Radio Obse…	JEG is supported by a Royal Society University Research Fellowship. AM is supported by World Premier International Research Center Initiative (WPIInitiative), MEXT, Japan. AM also acknowledges the support of the Japan Society for Promotion of Science (JSPS) fellowship. e-MERLIN is a National Facility operated by the University of Manchester at Jodrell Bank Observatory on behalf of the UK Science …	Richard J, 2014, MON NOT R ASTRON SOC, V444, P268, DOI 10.1093/mnras/stu1395; Jenness T, 2011, ASTR SOC P, V442, P281; Stark DP, 2008, NATURE, V455, P775, DOI 10.1038/nature07294; Zheng W, 2012, NATURE, V489, P406, DOI 10.1038/nature11446; Foreman-Mackey D, 2013, PUBL ASTRON SOC PAC, V125, P306, DOI 10.1086/670067; Scott KS, 2008, MON NOT R ASTRON SOC, V385, P2225, DOI 10.1111/J.1365-2966.2008.12…	39	0	0	3	3	OXFORD UNIV PRESS	OXFORD	GREAT CLARENDON ST, OXFORD OX2 6DP, ENGLAND	0035-8711	1365-2966		MON NOT R ASTRON SOC	Mon. Not. Roy. Astron. Soc.	2015-09-01	2015	452	1
J	Adriaens, T; Gomez, GSY; Bogaert, J; Crevecoeur, L; Beuckx, JP; Maes, D				Adriaens, Tim; San Martin Y Gomez, Gilles; Bogaert, Johan; Crevecoeur, Luc; Beuckx, Jean-Pierre; Maes, Dirk			Testing the applicability of regional IUCN Red List criteria on ladybirds (Coleoptera, Coccinellidae) in Flanders (north Belgium): opportunities for conservation	INSECT CONSERVATION AND DIVERSITY			English	Review						Citizen science; conservation; distribution; hotspots; threatened species	HARMONIA-AXYRIDIS; BRITISH BUTTERFLIES; SPECIES RICHNESS; INTRAGUILD PREDATION; DIVERSITY LOSS; CLIMATE-CHANGE; GLOBAL CHANGE; HABITAT; INVERTEBRATES; BEETLES	1. Red Lists assess the extinction risk of species and are an important tool to prioritise species conservation and management measures. Worldwide, quantitative IUCN criteria are used to estimate the threat status of species at the regional level. 2. In Flanders (north Belgium), about 70 000 distribution records of ladybirds were collected in 36% of all the grid cells (1 9 1 km 2) since 1990 duri…	[Adriaens, Tim; Maes, Dirk] Res Inst Nat & Forest INBO, B-1070 Brussels, Belgium; [San Martin Y Gomez, Gilles] Catholic Univ Louvain, Earth & Life Inst, Biodivers Res Ctr, Behav Ecol & Conservat Grp, Louvain La Neuve, Belgium; [Bogaert, Johan] Belgian Ladybird Working Grp, Kessel Lo, Belgium; [Crevecoeur, Luc] LIKONA, Genk, Belgium	Adriaens, T (reprint author), Res Inst Nat & Forest INBO, Klin Str 25, B-1070 Brussels, Belgium.	tim.adriaens@inbo.be	Maes, Dirk/B-1819-2009				Adriaens T., 2004, BERTRAM, V2, P1; Adriaens T., 2005, NATUUR FOCUS, V2005, P137; Adriaens T, 2003, BELG J ZOOL, V133, P195; Adriaens T, 2008, BIOCONTROL, V53, P69, DOI 10.1007/s10526-007-9137-6; Andersen AN, 1999, J INSECT CONSERV, V3, P61; Butchart SHM, 2005, PHILOS T ROY SOC B, V360, P255, DOI 10.4098/rstb.2004.1583; Kerr JT, 2000, CONSERV BIOL, V14, P1726, DOI 10.1046/j.1523-1739.2000.99275.x…	112	1	1	17	17	WILEY-BLACKWELL	HOBOKEN	111 RIVER ST, HOBOKEN 07030-5774, NJ USA	1752-458X	1752-4598		INSECT CONSERV DIVER	Insect. Conserv. Divers.	SEP	2015	8	5
J	Mazzoleni, M; Alfonso, L; Chacon-Hurtado, J; Solomatine, D				Mazzoleni, Maurizio; Alfonso, Leonardo; Chacon-Hurtado, Juan; Solomatine, Dimitri			Assimilating uncertain, dynamic and intermittent streamflow observations in hydrological models	ADVANCES IN WATER RESOURCES			English	Article						Data assimilation; Uncertain observation; Dynamic observations; Intermittent observations; Hydrological modeling	ENSEMBLE KALMAN FILTER; SIMULATION EXPERIMENTS; NEURAL-NETWORKS; SOIL-MOISTURE; VALIDATION; ADJUSTMENT; STATES	Catastrophic floods cause significant socio-economical losses. Non-structural measures, such as real-time flood forecasting, can potentially reduce flood risk. To this end, data assimilation methods have been used to improve flood forecasts by integrating static ground observations, and in some cases also remote sensing observations, within water models. Current hydrologic and hydraulic research …	[Mazzoleni, Maurizio; Alfonso, Leonardo; Chacon-Hurtado, Juan; Solomatine, Dimitri] UNESCO IHE Inst Water Educ, Hydroinformat Chair, NL-2611 AX Delft, Netherlands; [Solomatine, Dimitri] Delft Univ Technol, Water Resources Sect, NL-2600 AA Delft, Netherlands	Mazzoleni, M (reprint author), UNESCO IHE Inst Water Educ, Hydroinformat Chair, Westvest 7, NL-2611 AX Delft, Netherlands.	m.mazzoleni@unesco-ihe.org			European FP7 Project "We-Senselt: Citizen Observatory of Water" [308429]	This research is partly funded by the European FP7 Project "We-Senselt: Citizen Observatory of Water", grant agreement No. 308429. Data used are supplied by the British Atmospheric Data Centre from the NERC Hydrological Radar Experiment Dataset http://www.badc.rl.ac.uk/data/hyrex/. The authors would like to thank Professor Ezio Todini for his very useful comments provided.	Abebe AJ, 2004, J COMPUT CIVIL ENG, V18, P373, DOI 10.1061/(ASCE)0887-3801(2004)18:4(373); Errico RM, 2013, Q J ROY METEOR SOC, V139, P1162, DOI 10.1002/qj.2027; Brocca L, 2010, HYDROL EARTH SYST SC, V14, P1881, DOI 10.5194/hess-14-1881-2010; Chen F, 2011, ADV WATER RESOUR, V34, P526, DOI 10.1016/j.advwatres.2011.01.011; Chen JF, 2012, QUATERN INT, V282, P122, DOI 10.1016/j.quaint.2012.01.030; Mo…	65	0	0	11	11	ELSEVIER SCI LTD	OXFORD	THE BOULEVARD, LANGFORD LANE, KIDLINGTON, OXFORD OX5 1GB, OXON, ENGLAND	0309-1708	1872-9657		ADV WATER RESOUR	Adv. Water Resour.	SEP	2015	83
J	Birkin, L; Goulson, D				Birkin, Linda; Goulson, Dave			Using citizen science to monitor pollination services	ECOLOGICAL ENTOMOLOGY			English	Article						Bees; bumblebees; crop yield; ecosystem services; pollinator; urban; Vicia faba	VICIA-FABA-L; ECOSYSTEM SERVICES; LAND-USE; BUMBLEBEE; HABITATS; CONSERVATION; AGRICULTURE; DIVERSITY; GARDENS; BOMBUS	1. Pollination by insects is a vital ecosystem service and the need for its assessment is increasing in recognition and political pressure, but there are currently no large-scale systematic monitoring schemes in place to measure the direct provision of this service. 2. This study tested a protocol for using a citizen science approach to quantify pollination service provision in gardens and allotm…	[Birkin, Linda; Goulson, Dave] Univ Sussex, Sch Life Sci, Brighton BN1 9QG, E Sussex, England	Birkin, L (reprint author), Univ Sussex, Sch Life Sci, John Maynard Smith Bldg JMS,Falmer Campus, Brighton BN1 9QG, E Sussex, England.	L.Birkin@sussex.ac.uk			BBSRC	We thank Leila Simpson for help with volunteer management, and assistance with plant growth and hand-pollination. Rob Fowler provided advice on statistical analysis. This work was supported by a 'Sparking Impact' award from BBSRC. Project design, data collection, analysis, and paper writing by L.J.B., with advice on all sections, editing and supervision by D.G.	Ahrne K, 2009, PLOS ONE, V4, DOI 10.1371/journal.pone.0005574; Westphal C, 2008, ECOL MONOGR, V78, P653, DOI 10.1890/07-1292.1; Kremen C, 2007, ECOL LETT, V10, P299, DOI 10.1111/j.1461-0248.2007.01018.x; Costanza R, 1997, NATURE, V387, P253, DOI 10.1038/387253a0; Garratt MPD, 2014, BIOL CONSERV, V169, P128, DOI 10.1016/j.biocon.2013.11.001; Samnegard U, 2011, BIOL CONSERV, V144, P2602, DOI 10.101…	39	2	2	46	46	WILEY-BLACKWELL	HOBOKEN	111 RIVER ST, HOBOKEN 07030-5774, NJ USA	0307-6946	1365-2311		ECOL ENTOMOL	Ecol. Entomol.	SEP	2015	40			1
J	Morelli, F				Morelli, Federico			Indicator species for avian biodiversity hotspots: Combination of specialists and generalists is necessary in less natural environments	JOURNAL FOR NATURE CONSERVATION			English	Article						Taxonomical diversity; Surrogate species; Birds; Forest; Cultivated; Urban; Predictive power	BIRD COMMUNITIES; BIOTIC HOMOGENIZATION; DIFFERENT LANDSCAPES; TOP PREDATORS; CONSERVATION; RICHNESS; DIVERSITY; HETEROGENEITY; DETECTABILITY; METRICS	In this work, I tested the premise that the distribution of a group of few common bird species can be used to predict bird species hotspots in Central Italy. The data on bird observations were collected on 530 sampled sites (150 in cultivated, 150 in forest, 150 in grassland and 80 in urban and peri-urban environments). In each environment, sampled sites with values of bird species richness in th…	[Morelli, Federico] INRA, UMR SADAPT 1048, F-75005 Paris, France; [Morelli, Federico] AgroParisTech, UMR SADAPT 1048, F-75015 Paris, France	Morelli, F (reprint author), INRA, UMR SADAPT 1048, 16 Rue Claude Bernard, F-75005 Paris, France.	fmorellius@gmail.com					Morelli F, 2014, ECOL INDIC, V38, P236, DOI 10.1016/j.ecolind.2013.11.016; Lawton JH, 1998, NATURE, V391, P72, DOI 10.1038/34166; Kissling WD, 2012, GLOBAL ECOL BIOGEOGR, V21, P328, DOI 10.1111/j.1466-8238.2011.00679.x; Gregory RD, 2005, PHILOS T R SOC B, V360, P269, DOI 10.1098/rstb.2004.1602; Roberge JM, 2004, CONSERV BIOL, V18, P76, DOI 10.1111/j.1523-1739.2004.00450.x; Lambeck RJ, 1997, CONSE…	72	0	0	18	18	ELSEVIER GMBH, URBAN & FISCHER VERLAG	JENA	OFFICE JENA, P O BOX 100537, 07705 JENA, GERMANY	1617-1381	1618-1093		J NAT CONSERV	J. Nat. Conserv.	SEP	2015	27
J	Williams, RL; Stafford, R; Goodenough, AE				Williams, Rachel L.; Stafford, Richard; Goodenough, Anne E.			Biodiversity in urban gardens: Assessing the accuracy of citizen science data on garden hedgehogs	URBAN ECOSYSTEMS			English	Article						Hedgehog; Garden; Urban biodiversity; Mammal; Citizen science	ERINACEUS-EUROPAEUS; QUESTIONNAIRE LENGTH; DETECTION PROBABILITIES; GREAT-BRITAIN; POPULATIONS; DENSITY; BIRDS; ABUNDANCE; TRENDS; ROADS	Urban gardens provide a rich habitat for species that are declining in rural areas. However, collecting data in gardens can be logistically-challenging, time-consuming and intrusive to residents. This study examines the potential of citizen scientists to record hedgehog sightings and collect habitat data within their own gardens using an online questionnaire. Focussing on a charismatic species me…	[Williams, Rachel L.] Kingston Maurward Coll, Dorchester DT2 8PY, Dorset, England; [Williams, Rachel L.; Goodenough, Anne E.] Univ Gloucestershire, Sch Nat & Social Sci, Cheltenham GL50 4AZ, Glos, England; [Stafford, Richard] Bournemouth Univ, Ctr Conservat Ecol & Environm Sci, Poole BH12 5BB, Dorset, England	Williams, RL (reprint author), Univ Gloucestershire, Sch Nat & Social Sci, Cheltenham GL50 4AZ, Glos, England.	rachel.williams@kmc.ac.uk	Stafford, Richard/B-1059-2013	Stafford, Richard/0000-0002-1964-5787			Jepson C, 2005, J CLIN EPIDEMIOL, V58, P103, DOI 10.1016/j.jclinepi.2004.06.004; Delaney DG, 2008, BIOL INVASIONS, V10, P117, DOI 10.1007/s10530-007-9114-0; Young RP, 2006, J ZOOL, V269, P349, DOI 10.1111/j.1469-7998.2006.00078.x; Fitzpatrick MC, 2009, ECOL APPL, V19, P1673, DOI 10.1890/09-0265.1; Davies ZG, 2009, BIOL CONSERV, V142, P761, DOI 10.1016/j.biocon.2008.12.016; Wilson JD, 1999, AGR EC…	50	0	0	35	35	SPRINGER	DORDRECHT	VAN GODEWIJCKSTRAAT 30, 3311 GZ DORDRECHT, NETHERLANDS	1083-8155	1573-1642		URBAN ECOSYST	Urban Ecosyst.	SEP	2015	18	3
J	Staddon, SC; Nightingale, A; Shrestha, SK				Staddon, Sam C.; Nightingale, Andrea; Shrestha, Shyam K.			Exploring participation in ecological monitoring in Nepal's community forests	ENVIRONMENTAL CONSERVATION			English	Article						citizen science; community-based conservation; development studies; ecological monitoring; interdisciplinary; Nepal; participation; participatory monitoring	CONSERVATION; MANAGEMENT; KNOWLEDGE; ORGANIZATIONS; BIODIVERSITY	Members of the public and resource-dependent communities are increasingly participating alongside professional scientists to monitor the natural world. This study applies the contention from development studies that participatory approaches may be tyrannical to participatory monitoring of Nepal's community forests. There is a tyranny of the group because elites within the community stand to benef…	[Staddon, Sam C.; Nightingale, Andrea; Shrestha, Shyam K.] Univ Edinburgh, Geog & Lived Environm, Edinburgh EH8 9XP, Midlothian, Scotland; [Nightingale, Andrea] Univ Gothenburg, Sch Global Studies, Gothenburg, Sweden	Staddon, SC (reprint author), Univ Edinburgh, Geog & Lived Environm, Drummond St, Edinburgh EH8 9XP, Midlothian, Scotland.	sam.staddon@ed.ac.uk					Abbot J., 1998, 2 SARL IIED; Agrawal A, 1999, WORLD DEV, V27, P629, DOI 10.1016/S0305-750X(98)00161-2; Danielsen F, 2009, CONSERV BIOL, V23, P31, DOI 10.1111/j.1523-1739.2008.01063.x; Nielsen Martin Reinhardt, 2012, Conservation & Society, V10, P1, DOI 10.4103/0972-4923.92188; Lawrence A, 2009, GLOBAL ENVIRON CHANG, V19, P173, DOI 10.1016/j.gloenvcha.2009.01.006; Bell S, 2008, BIODIVERS CONSERV, …	44	0	0	22	22	CAMBRIDGE UNIV PRESS	NEW YORK	32 AVENUE OF THE AMERICAS, NEW YORK, NY 10013-2473 USA	0376-8929	1469-4387		ENVIRON CONSERV	Environ. Conserv.	SEP	2015	42	3
J	Yang, DQ; Zhang, DQ; Chen, LB; Qu, BQ				Yang, Dingqi; Zhang, Daqing; Chen, Longbiao; Qu, Bingqing			NationTelescope: Monitoring and visualizing large-scale collective behavior in LBSNs	JOURNAL OF NETWORK AND COMPUTER APPLICATIONS			English	Article						Participatory sensing; Collective behavior; Location based social networks; System usability scale	SOCIAL NETWORKS	The research of collective behavior has attracted a lot of attention in recent years, which can empower various applications, such as recommendation systems and intelligent transportation systems. However, in traditional social science, it is practically difficult to collect large-scale user behavior data. Fortunately, with the ubiquity of smartphones and Location Based Social Networks (LBSNs), u…	[Yang, Dingqi; Zhang, Daqing; Chen, Longbiao] TELECOM SudParis, Inst Mines TELECOM, Dept Telecommun Network & Serv, F-91011 Evry, France; [Yang, Dingqi] Univ Fribourg, eXascale Infolab, CH-1700 Fribourg, Switzerland; [Qu, Bingqing] Univ Rennes 1, IRISA, F-35014 Rennes, France; [Qu, Bingqing] INRIA Rennes, Rennes, France	Yang, DQ (reprint author), TELECOM SudParis, Inst Mines TELECOM, Dept Telecommun Network & Serv, F-91011 Evry, France.	Dingqi.Yang@unifr.ch; Daqing.Zhang@it-sudparis.eu; Longbiao.Chen@it-sudparis.eu					Ostrom E, 2000, J ECON PERSPECT, V14, P137, DOI 10.1257/jep.14.3.137; Madden PAF, 1996, ARCH GEN PSYCHIAT, V53, P47; Berg P, 2004, IND LABOR RELAT REV, V57, P331, DOI 10.2307/4126655; Cheng H, 2008, PROC INT CONF DATA, P169; Lewis JR, 2009, LECT NOTES COMPUT SC, V5619, P94, DOI 10.1007/978-3-642-02806-9_12; Wang Z, 2014, IEEE T SYST MAN CY-S, V44, P499, DOI 10.1109/TSMC.2013.2256890; Gavalas D, 2…	29	0	0	9	9	ACADEMIC PRESS LTD- ELSEVIER SCIENCE LTD	LONDON	24-28 OVAL RD, LONDON NW1 7DX, ENGLAND	1084-8045			J NETW COMPUT APPL	J. Netw. Comput. Appl.	SEP	2015	55
J	Aguzzi, J; Doya, C; Tecchio, S; De Leo, FC; Azzurro, E; Costa, C; Sbragaglia, V; Del Rio, J; Navarro, J; Ruhl, HA; Company, JB; Favali, P; Purser, A; Thomsen, L; Catalan, IA				Aguzzi, J.; Doya, C.; Tecchio, S.; De Leo, F. C.; Azzurro, E.; Costa, C.; Sbragaglia, V.; Del Rio, J.; Navarro, J.; Ruhl, H. A.; Company, J. B.; Favali, P.; Purser, A.; Thomsen, L.; Catalan, I. A.			Coastal observatories for monitoring of fish behaviour and their responses to environmental changes	REVIEWS IN FISH BIOLOGY AND FISHERIES			English	Review						Cabled observatories; OBSEA; EMSO; Fish assemblages; Multivariate statistics; Crawler; Citizen Science	CANONICAL CORRELATION-ANALYSIS; CLIMATE-CHANGE IMPACTS; CORAL-REEF FISHES; DEEP-SEA; ACTIVITY RHYTHMS; CHRONOBIOLOGICAL APPROACH; TERRESTRIAL ECOLOGY; CIRCADIAN ACTIVITY; CONTINENTAL-SHELF; CITIZEN SCIENCE	The inclusion of behavioral components in the analysis of a community can be of paramount importance in marine ecology. Diel (i.e., 24-h based), seasonal activity rhythms, or longer durational in behavioral responses can result in shifts in populations, and therefore on measurable abundances. Here, we review the value of developing cabled video observatory technology for the remote, long-term, an…	[Aguzzi, J.; Doya, C.; Sbragaglia, V.; Navarro, J.; Company, J. B.] CSIC, Inst Ciencies Mar, E-08003 Barcelona, Spain; [Tecchio, S.] Normandie Univ UNICAEN, UMR BOREA, MNHN, UPMC,CNRS 7208,IRD 207, F-14032 Caen 5, France; [De Leo, F. C.] Univ Victoria, Ocean Networks Canada, Victoria, BC V8P 5C2, Canada; [Azzurro, E.] Inst Environm Protect & Res ISPRA, I-57123 Livorno, Italy; [Costa, C.] Consigli…	Aguzzi, J (reprint author), CSIC, Inst Ciencies Mar, Pg Maritim Barceloneta 37-49, E-08003 Barcelona, Spain.	jaguzzi@cmima.csic.es	Costa, Corrado/B-1208-2012; Navarro, Joan/C-2119-2009	Costa, Corrado/0000-0003-3711-1399; Navarro, Joan/0000-0002-5756-9543	RITFIM [CTM2010-16274]; European Multidisciplinary Seafloor Observation (EMSO Preparatory Phase-FP7) [Infrastructures-2007-1, 211816]; Helmholtz Alliance "Robotic Exploration of Extreme Environments (ROBEX)" project; REC2 from the Spanish Government [CTM2011-23835]	This research was funded by RITFIM (CTM2010-16274) and European Multidisciplinary Seafloor Observation (EMSO Preparatory Phase-FP7 Infrastructures-2007-1, Proposal 211816). Researchers from CSIC-UPC are members of the Associated Unit Tecnoterra. The paper was also partially funded by the Helmholtz Alliance "Robotic Exploration of Extreme Environments (ROBEX)" project. I.A. Catalan was partially s…	Aguzzi J, 2013, MAR ECOL PROG SER, V486, P223, DOI 10.3354/meps10399; Aguzzi J, 2009, FISH RES, V100, P274, DOI 10.1016/j.fishres.2009.08.010; Aguzzi J, 2011, SENSORS-BASEL, V11, P5850, DOI 10.3390/s110605850; Aguzzi J, 2012, OCEANOGR MAR BIOL, V50, P235; Aguzzi J, 2009, MAR ECOL-EVOL PERSP, V30, P366, DOI 10.1111/j.1439-0485.2008.00276.x; Albouy C, 2012, GLOBAL CHANGE BIOL, V18, P2995, DOI 10.11…	126	0	0	50	50	SPRINGER	DORDRECHT	VAN GODEWIJCKSTRAAT 30, 3311 GZ DORDRECHT, NETHERLANDS	0960-3166	1573-5184		REV FISH BIOL FISHER	Rev. Fish. Biol. Fish.	SEP	2015	25	3
J	Hyder, K; Townhill, B; Anderson, LG; Delany, J; Pinnegar, JK				Hyder, Kieran; Townhill, Bryony; Anderson, Lucy G.; Delany, Jane; Pinnegar, John K.			Can citizen science contribute to the evidence-base that underpins marine policy?	MARINE POLICY			English	Article						Citizen science; Marine policy; Marine evidence	COASTAL MANAGEMENT; FISH ASSEMBLAGES; NORTH-SEA; COMMUNITY; REEF; PARTICIPATION; BIODIVERSITY; VOLUNTEERS; INTERFACE; KNOWLEDGE	Marine legislation is becoming ever more complex, so new cost-effective ways of obtaining and processing increasingly large data sets are required to support evidence-based policy making. Citizen science is one solution, but the uptake of the evidence generated by citizens among policy makers is often limited. Here, the importance of citizen science in delivery of the evidence-base that underpins…	[Hyder, Kieran; Townhill, Bryony; Pinnegar, John K.] Cefas, Lowestoft NR33 0HT, Suffolk, England; [Anderson, Lucy G.] Univ Leeds, Fac Biol Sci, Leeds LS2 9JT, W Yorkshire, England; [Delany, Jane] Newcastle Univ, Sch Marine Sci & Technol, Dove Marine Lab, Cullercoats NE30 4PZ, North Shields, England	Hyder, K (reprint author), Cefas, Lowestoft Lab, Pakefield Rd, Lowestoft NR33 0HT, Suffolk, England.	kieran.hyder@cefas.co.uk			Defra project [MF1230]; Heritage Lottery Funding for the Big Sea Survey [HG-08-13563]; BBSRC; Cefas [BB/F016603/1]	This paper is based on knowledge and evidence generated under Defra project MF1230 (Citizen Science Investigations-empowering the public through the use of novel technologies to collect policy-relevant marine data) and supported the contributions of Kieran Hyder, Bryony Townhill and John Pinnegar. Jane Delany was supported by Heritage Lottery Funding for the Big Sea Survey (HG-08-13563), and Lucy…	Anderson JA, 2014, MAR POLLUT BULL, V79, P261, DOI 10.1016/j.marpolbul.2013.12.002; Evans SM, 2000, MAR POLLUT BULL, V40, P220, DOI 10.1016/S0025-326X(99)00228-3; Delaney DG, 2008, BIOL INVASIONS, V10, P117, DOI 10.1007/s10530-007-9114-0; Gillett DJ, 2012, ENVIRON MONIT ASSESS, V184, P3239, DOI 10.1007/s10661-011-2185-5; van Franeker JA, 2011, ENVIRON POLLUT, V159, P2609, DOI 10.1016/j.envpol.201…	84	0	0	28	28	ELSEVIER SCI LTD	OXFORD	THE BOULEVARD, LANGFORD LANE, KIDLINGTON, OXFORD OX5 1GB, OXON, ENGLAND	0308-597X	1872-9460		MAR POLICY	Mar. Pol.	SEP	2015	59
J	Mossman, HL; Panter, CJ; Dolman, PM				Mossman, Hannah L.; Panter, Christopher J.; Dolman, Paul M.			Modelling biodiversity distribution in agricultural landscapes to support ecological network planning	LANDSCAPE AND URBAN PLANNING			English	Article						Citizen science; Ditch; Habitat connectivity; Wetland; Agricultural ditch; Dispersal corridor	SPECIES RICHNESS; PROTECTED AREAS; ARABLE FENLAND; LONG-DISTANCE; HABITAT; CONSERVATION; DITCHES; CONNECTIVITY; COMMUNITIES; CORRIDORS	Strategic approaches to biodiversity conservation increasingly emphasise the restoration of ecological connectivity at landscape scales. However, understanding where these connecting elements should be placed in the landscape is critical if they are to provide both value for money and for biodiversity. For such planning to be effective, it is necessary to have information of the distributions of …	[Mossman, Hannah L.; Panter, Christopher J.; Dolman, Paul M.] Univ E Anglia, Sch Environm Sci, Norwich NR4 7TJ, Norfolk, England	Mossman, HL (reprint author), Manchester Metropolitan Univ, Sch Sci & Environm, Div Biol & Conservat Ecol, Chester St, Manchester M1 5GD, Lancs, England.	h.mossman@mmu.ac.uk; c.panter@footprint-ecology.co.uk; p.dolman@uea.ac.uk			Environment Agency; Fens; Natural England; National Trust; Royal Society for the Protection of Birds; Lincolnshire Wildlife Trust; Bedfordshire, Cambridgeshire and Northamptonshire Wildlife Trust; Cambridge and Peterborough Environmental Records Centre; Suffolk Biological Records Centre; Norfolk Biodiversity Information Service; Norfolk Biodiversity Partnership	This work is built on a project funded by the Environment Agency and supported by the Fens for the Future Partnership. We gratefully acknowledge the support and assistance of Natural England, Environment Agency, National Trust, Royal Society for the Protection of Birds, Lincolnshire Wildlife Trust, Bedfordshire, Cambridgeshire and Northamptonshire Wildlife Trust, Cambridge and Peterborough Enviro…	Krewenka KM, 2011, BIOL CONSERV, V144, P1816, DOI 10.1016/j.biocon.2011.03.014; Atauri JA, 2001, LANDSCAPE ECOL, V16, P147, DOI 10.1023/A:1011115921050; Simon TN, 2011, HYDROBIOLOGIA, V661, P163, DOI 10.1007/s10750-010-0521-3; Klar N, 2012, LANDSCAPE URBAN PLAN, V105, P376, DOI 10.1016/j.landurbplan.2012.01.007; Brooks TM, 2004, CONSERV BIOL, V18, P616, DOI 10.1111/j.1523-1739.2004.01836.x; Lomba…	56	0	0	47	47	ELSEVIER SCIENCE BV	AMSTERDAM	PO BOX 211, 1000 AE AMSTERDAM, NETHERLANDS	0169-2046	1872-6062		LANDSCAPE URBAN PLAN	Landsc. Urban Plan.	SEP	2015	141
J	Michel, C; Woods, AT; Neuhauser, M; Landgraf, A; Spence, C				Michel, Charles; Woods, Andy T.; Neuhaeuser, Markus; Landgraf, Alberto; Spence, Charles			Rotating plates: Online study demonstrates the importance of orientation in the plating of food	FOOD QUALITY AND PREFERENCE			English	Article						Plating; Vision; Preference; Triangles; Online testing; Food aesthetics; Gastrophysics; Crowdsourcing; Citizen science; Food perception	GEOMETRIC SHAPES; AESTHETICS; LIKING; TASTE	We report three online experiments designed to assess how the visual composition of the elements of a commercially-successful dish would be perceived by naive assessors, in terms of their liking and willingness to pay. Experiment 1 showed that an upward orientation of the dish was preferred as compared to when the elements pointed downward/toward the observer, or else pointed to the side. Experim…	[Michel, Charles; Woods, Andy T.; Spence, Charles] Univ Oxford, Dept Expt Psychol, Crossmodal Res Lab, Oxford OX1 3UD, England; [Woods, Andy T.] Xperiment, Lausanne, Switzerland; [Neuhaeuser, Markus] Dept Math & Tech, Remagen, Germany; [Landgraf, Alberto] Restaurant Epice, Sao Paulo, Brazil	Michel, C (reprint author), Univ Oxford, Dept Expt Psychol, Crossmodal Res Lab, S Parks Rd, Oxford OX1 3UD, England.	charles.michel@psy.ox.ac.uk			Arts and Humanities Research Council (AHRC) - United Kingdom [AH/L007053/1]	C.M. is the Chef-in-residence at the Crossmodal Research Laboratory, University of Oxford. We would like to thank the Science Museum, London, for hosting our experiment within the 'Cravings' exhibition, and Kin-Design for their help in creating the digital platform. C.S. would like to thank the Arts and Humanities Research Council (AHRC) - United Kingdom who funded the Rethinking the Senses proje…	Agostinelli C, 2013, R PACKAGE CIRCULAR C; Amheim R., 1988, POWER CTR; KAHNEMAN D, 1973, PSYCHOL REV, V80, P237, DOI 10.1037/h0034747; Larson CL, 2007, EMOTION, V7, P526, DOI 10.1037/1528-3542.7.3.526; Behrend TS, 2011, BEHAV RES METHODS, V43, P800, DOI 10.3758/s13428-011-0081-0; van der Laan LN, 2011, NEUROIMAGE, V55, P296, DOI 10.1016/j.neuroimage.2010.11.055; Oppenheimer DM, 2009, J EXP SOC PS…	38	2	2	6	6	ELSEVIER SCI LTD	OXFORD	THE BOULEVARD, LANGFORD LANE, KIDLINGTON, OXFORD OX5 1GB, OXON, ENGLAND	0950-3293	1873-6343		FOOD QUAL PREFER	Food. Qual. Prefer.	SEP	2015	44
J	Sirbu, A; Becker, M; Caminiti, S; De Baets, B; Elen, B; Francis, L; Gravino, P; Hotho, A; Ingarra, S; Loreto, V; Molino, A; Mueller, J; Peters, J; Ricchiuti, F; Saracino, F; Servedio, VDP; Stumme, G; Theunis, J; Tria, F; Van den Bossche, J				Sirbu, Alina; Becker, Martin; Caminiti, Saverio; De Baets, Bernard; Elen, Bart; Francis, Louise; Gravino, Pietro; Hotho, Andreas; Ingarra, Stefano; Loreto, Vittorio; Molino, Andrea; Mueller, Juergen; Peters, Jan; Ricchiuti, Ferdinando; Saracino, Fabio; Servedio, Vito D. P.; Stumme, Gerd; Theunis, Jan; Tria, Francesca; Van den Bossche, Joris			Participatory Patterns in an International Air Quality Monitoring Initiative	PLOS ONE			English	Article							TRANSPORT MICROENVIRONMENTS; EXPOSURE; POLLUTION; CARBON	The issue of sustainability is at the top of the political and societal agenda, being considered of extreme importance and urgency. Human individual action impacts the environment both locally (e.g., local air/water quality, noise disturbance) and globally (e.g., climate change, resource use). Urban environments represent a crucial example, with an increasing realization that the most effective w…	[Sirbu, Alina; Ingarra, Stefano; Loreto, Vittorio; Saracino, Fabio; Tria, Francesca] Inst Sci Interchange Fdn, Complex Networks & Syst Lagrange Lab, Turin, Italy; [Sirbu, Alina] Univ Bologna, Dept Comp Sci & Engn, Bologna, Italy; [Becker, Martin; Hotho, Andreas] Univ Wurzburg, Dept Artificial Intelligence & Appl Comp Sci, D-97070 Wurzburg, Germany; [Becker, Martin; Hotho, Andreas; Mueller, Juerge…	Sirbu, A (reprint author), Inst Sci Interchange Fdn, Complex Networks & Syst Lagrange Lab, Turin, Italy.	alina.sirbu@unibo.it	Sirbu, Alina/I-3288-2014	Sirbu, Alina/0000-0002-3947-7143	EveryAware project - Future and Emerging Technologies program (IST-FET) of the European Commission under the EU RD [IST-265432]; SONY-CSL Computer Science Lab	This research has been supported by the EveryAware project funded by the Future and Emerging Technologies program (IST-FET) of the European Commission under the EU RD contract IST-265432. SONY-CSL Computer Science Lab provided support in the form of salaries for author VL, but did not have any additional role in the study design, data collection and analysis, decision to publish, or preparation o…	Garas A, 2012, SCI REP-UK, V2, DOI 10.1038/srep00402; Raaschou-Nielsen O, 2013, LANCET ONCOL, V14, P813, DOI 10.1016/S1470-2045(13)70279-1; Setton E, 2011, J EXPO SCI ENV EPID, V21, P42, DOI 10.1038/jes.2010.14; [Anonymous], 2013, AIR QUAL EUR 2013 RE; Peters J, 2014, ATMOS ENVIRON, V92, P31, DOI 10.1016/j.atmosenv.2014.03.039; Peters J, 2013, AEROSOL AIR QUAL RES, V13, P509, DOI 10.4209/aaqr.201…	23	0	0	16	16	PUBLIC LIBRARY SCIENCE	SAN FRANCISCO	1160 BATTERY STREET, STE 100, SAN FRANCISCO, CA 94111 USA	1932-6203			PLOS ONE	PLoS One	2015-08-27	2015	10	8
J	Rich, KJ; Ridealgh, M; West, SE; Cinderby, S; Ashmore, M				Rich, Kevin J.; Ridealgh, Michael; West, Sarah E.; Cinderby, Steve; Ashmore, Mike			Exploring the Links between Post-Industrial Landscape History and Ecology through Participatory Methods	PLOS ONE			English	Article							ECOSYSTEM SERVICES; CONSERVATION; RESTORATION; COMMUNITIES; HYMENOPTERA; MANAGEMENT; DYNAMICS	There is increasing recognition of the importance for local biodiversity of post-mining sites, many of which lie near communities that have suffered significant social and economic deprivation as the result of mine closures. However, no studies to date have actively used the knowledge of local communities to relate the history and treatment of post-mining sites to their current ecological status.…	[Rich, Kevin J.; Ridealgh, Michael] Univ York, Dept Environm, York YO10 5DD, N Yorkshire, England; [West, Sarah E.; Cinderby, Steve; Ashmore, Mike] Univ York, Stockholm Environm Inst, York YO10 5DD, N Yorkshire, England	West, SE (reprint author), Univ York, Stockholm Environm Inst, York YO10 5DD, N Yorkshire, England.	sarah.west@york.ac.uk			National Lottery (UK) through the Big Lottery Fund	This work was conducted under the OPAL (Open Air Laboratories) project, which is funded by The National Lottery (UK) through the Big Lottery Fund (grant holder MA). The funders had no role in study design, data collection, analysis, decision to publish, or preparation of the manuscript.	Hobbs SJ, 2012, J NAT CONSERV, V20, P364, DOI 10.1016/j.jnc.2012.08.002; Schadek Ute, 2009, Urban Ecosystems, V12, P115, DOI 10.1007/s11252-008-0072-9; Baasch A, 2012, J APPL ECOL, V49, P251, DOI 10.1111/j.1365-2664.2011.02086.x; Andersson E, 2007, ECOL APPL, V17, P1267, DOI 10.1890/06-1116.1; Holec M, 2005, PEDOBIOLOGIA, V49, P345, DOI 10.1016/j.pedobi.2005.03.001; Cooper CB, 2007, ECOL SOC, V12…	30	0	0	17	17	PUBLIC LIBRARY SCIENCE	SAN FRANCISCO	1160 BATTERY STREET, STE 100, SAN FRANCISCO, CA 94111 USA	1932-6203			PLOS ONE	PLoS One	2015-08-26	2015	10	8
J	Davis, W; Murphy, AG				Davis, Wallace, III; Murphy, Anne G.			Plastic in surface waters of the Inside Passage and beaches of the Salish Sea in Washington State	MARINE POLLUTION BULLETIN			English	Article						Citizen science; Microplastic; Sandy beaches; Surface water; Salish Sea; Inside Passage	NEW-ZEALAND BEACHES; MARINE-ENVIRONMENT; SUBTROPICAL GYRE; DEBRIS; ACCUMULATION; INGESTION; PACIFIC; OCEAN; TRANSPORT; CHEMICALS	We summarize results of two independent studies on plastic pollution in the marine environment that overlap in time and space. One study evaluated the abundance of anthropogenic debris on 37 sandy beaches bordering the Salish Sea in Washington State while the other characterized plastic debris in surface waters of the Salish Sea and the Inside Passage to Skagway, Alaska. Both studies concluded th…	[Davis, Wallace, III] Leviton Mfg, Qual, Melville, NY USA; [Murphy, Anne G.] Port Townsend Marine Sci Ctr, Port Townsend, WA USA		wallydavis3@gmail.com			Washington State Department of Ecology's Public Participation program; Foss Maritime; University of Washington at Tacoma's Center for Urban Waters	The beach sampling project would not have been possible without the commitment of more than 600 volunteers from 16 community organizations and institutions and Jen Kingfisher who served as Project Lead for two years. We thank mentors, advisors and inspirers Marcus Eriksen of Five Gyres, Captain Charles Moore of Algalita Marine Research Foundation, Richard Jahnke, Debbie Jahnke, and Frank Handler.…	Boerger CM, 2010, MAR POLLUT BULL, V60, P2275, DOI 10.1016/j.marpolbul.2010.08.007; Eriksson C, 2003, AMBIO, V32, P380, DOI 10.1639/0044-7447(2003)032[0380:OABAOS]2.0.CO;2; Cole M, 2013, ENVIRON SCI TECHNOL, V47, P6646, DOI 10.1021/es400663f; Law KL, 2014, ENVIRON SCI TECHNOL, V48, P4732, DOI 10.1021/es4053076; GREGORY M R, 1977, Marine Pollution Bulletin, V8, P82, DOI 10.1016/0025-326X(77)90193-…	39	0	0	23	23	PERGAMON-ELSEVIER SCIENCE LTD	OXFORD	THE BOULEVARD, LANGFORD LANE, KIDLINGTON, OXFORD OX5 1GB, ENGLAND	0025-326X	1879-3363		MAR POLLUT BULL	Mar. Pollut. Bull.	2015-08-15	2015	97	2015-01-02
J	Rod, JK; Opach, T; Neset, TS				Rod, Jan Ketil; Opach, Tomasz; Neset, Tina-Simone			Three core activities toward a relevant integrated vulnerability assessment: validate, visualize, and negotiate	JOURNAL OF RISK RESEARCH			English	Article						climate-change adaptation; exposure; integrated vulnerability assessment; geovisualization; participatory GIS	ENVIRONMENTAL HAZARDS; SOCIAL VULNERABILITY; NORWAY; CLIMATE; INEQUALITIES; INFORMATION; MORTALITY; INCOME	Future climate in the Nordic countries is expected to become warmer, wetter, and wilder', and this will probably cause more extreme weather events. Therefore, local authorities need to improve their ability to assess weather-related hazards such as floods, landslides, and storms, as well as people's sensitivity and capacity to cope with or adjust to such events. In this article, we present an int…	[Rod, Jan Ketil; Opach, Tomasz] Norwegian Univ Sci & Technol NTNU, Dept Geog, Trondheim, Norway; [Neset, Tina-Simone] Linkoping Univ, Ctr Climate Sci & Policy Res, Water & Environm Studies, Linkoping, Sweden	Rod, JK (reprint author), Norwegian Univ Sci & Technol NTNU, Dept Geog, Trondheim, Norway.	jan.rod@svt.ntnu.no			Norden Top-level Research Initiative sub-programme 'Effect Studies and Adaptation to Climate Change'	Research presented in this article contributes to the Nordic Centre of Excellence for Strategic Adaptation Research (NORD-STAR), which is funded by the Norden Top-level Research Initiative sub-programme 'Effect Studies and Adaptation to Climate Change'. An earlier version of this article was presented at the 22nd Society for Risk Analysis Europe (SRA-E) Conference: Safe Societies. Coping with Com…	Aaberge R, 2006, REV INCOME WEALTH, P61; Aall C., 2005, 605 PROSUS; Kienberger S, 2009, NAT HAZARD EARTH SYS, V9, P767; Lahelma E, 2002, SOC SCI MED, V55, P609, DOI 10.1016/S0277-9536(01)00191-5; Salter JD, 2009, J ENVIRON MANAGE, V90, P2090, DOI 10.1016/j.jenvman.2007.08.023; Sheppard SRJ, 2011, FUTURES, V43, P400, DOI 10.1016/j.futures.2011.01.009; Naess LO, 2006, GLOBAL ENVIRON CHANG, V16, P22…	38	1	1	26	26	ROUTLEDGE JOURNALS, TAYLOR & FRANCIS LTD	ABINGDON	4 PARK SQUARE, MILTON PARK, ABINGDON OX14 4RN, OXFORDSHIRE, ENGLAND	1366-9877	1466-4461		J RISK RES	J. Risk Res.	2015-08-09	2015	18	7			SI
J	Macaraig, JMR				Macaraig, J. Marvin R.			Citizen Science and Greenspace Planning in the Rouge River Watershed	JOURNAL OF ENVIRONMENTAL POLICY & PLANNING			English	Article						Rouge Park; Rouge River; civil society; citizen science; greenspace; Greenbelt; protected areas; Toronto; Ontario	POLITICS; ONTARIO; CANADA; GOVERNANCE; TORONTO	The Rouge Park is a large 46-km(2) protected greenspace situated in one of Canada's largest urbanized regions, the Greater Toronto Area (GTA), an area that covers the Region of Halton, Region of Peel, Region of York, Region of Durham, and the City of Toronto. This article highlights the actions and participation of civil society groups working in the park and how they have been successful in util…	Univ Toronto Scarborough, Dept Human Geog, Toronto, ON M1C 1A4, Canada	Macaraig, JMR (reprint author), Univ Toronto Scarborough, Dept Human Geog, 1265 Mil Trail, Toronto, ON M1C 1A4, Canada.	marvin.macaraig@alum.utoronto.ca					Whitelaw G, 2003, ENVIRON MONIT ASSESS, V88, P409, DOI 10.1023/A:1025545813057; Meriano M, 2003, HYDROGEOL J, V11, P288, DOI 10.1007/s10040-002-0226-4; Conrad CC, 2011, ENVIRON MONIT ASSESS, V176, P273, DOI 10.1007/s10661-010-1582-5; Silvertown J, 2009, TRENDS ECOL EVOL, V24, P467, DOI 10.1016/j.tree.2009.03.017; Bliss J., 2001, Journal of Sustainable Forestry, V12, P143, DOI 10.1300/J091v12n03_0…	31	0	0	38	38	ROUTLEDGE JOURNALS, TAYLOR & FRANCIS LTD	ABINGDON	4 PARK SQUARE, MILTON PARK, ABINGDON OX14 4RN, OXFORDSHIRE, ENGLAND	1523-908X	1522-7200		J ENVIRON POL PLAN	J. Environ. Pol. Plan.	2015-08-08	2015	17	4
J	Schoenecker, KA; Watry, MK; Ellison, LE; Schwartz, MK; Luikart, G				Schoenecker, Kathryn A.; Watry, Mary Kay; Ellison, Laura E.; Schwartz, Michael K.; Luikart, Gordon			ESTIMATING BIGHORN SHEEP (OVIS CANADENSIS) ABUNDANCE USING NONINVASIVE SAMPLING AT A MINERAL LICK WITHIN A NATIONAL PARK WILDERNESS AREA	WESTERN NORTH AMERICAN NATURALIST			English	Article							ESTIMATING ANIMAL ABUNDANCE; POPULATION-SIZE ESTIMATION; MOUNTAIN LION PREDATION; GENOTYPING ERROR RATES; FECAL-DNA; CAPTURE; FECES; PELLETS; DEER; MANAGEMENT	Conservation of species requires accurate population estimates. We used genetic markers from feces to determine bighorn sheep abundance for a herd that was hypothesized to be declining and in need of population status monitoring. We sampled from a small but accessible portion of the population's range where animals naturally congregate at a natural mineral lick to test whether we could accurately…	[Schoenecker, Kathryn A.] US Geol Survey, Ft Collins Sci Ctr, Ft Collins, CO 80523 USA; [Schoenecker, Kathryn A.] Colorado State Univ, Dept Ecosyst Sci & Sustainabil, Ft Collins, CO 80523 USA; [Watry, Mary Kay] Rocky Mt Natl Pk, Resources Management, Estes Pk, CO 80517 USA; [Ellison, Laura E.] US Geol Survey, Ft Collins Sci Ctr, Ft Collins, CO 80526 USA; [Schwartz, Michael K.] US Forest Serv, Roc…	Schoenecker, KA (reprint author), US Geol Survey, Ft Collins Sci Ctr, Ft Collins, CO 80523 USA.	schoeneckerk@usgs.gov	Schwartz, Michael/C-3184-2014	Schwartz, Michael/0000-0003-3521-3367	Park Oriented Biological Support Program, U.S. Geological Survey, Washington, DC; NSF [DEB-1067613, 0742181]	We are grateful to field technicians and volunteers including G. Althen, J. Ames-Curtis, G. Anderson, G. Appel, G. Baird, C. Bell, B. Bolinger, B. Cairns, L. Campbell, G. Campbell, L. Carr, L. Carr, M. Clapp, M. Cramer, J. Cramer, K. Cronin, J. DeRuiter, E. Ertl, R. Gallardo, C. Gerhard, M. Grether, D. Hay, M. Huba, F. Jacoby, T. Jones, W. Kaesler, J. Kilgore, L. Kilgore, D. Kuntz, S. Lauffer, J.…	Waits LP, 2005, J WILDLIFE MANAGE, V69, P1419, DOI 10.2193/0022-541X(2005)69[1419:NGSTFW]2.0.CO;2; Maudet C, 2004, MOL ECOL NOTES, V4, P772, DOI 10.1111/j.1471-8286.2004.00787.x; Harris RB, 2010, J WILDLIFE MANAGE, V74, P668, DOI 10.2193/2009-292; Kendall KC, 2008, J WILDLIFE MANAGE, V72, P1693, DOI 10.2193/2008-007; Brinkman TJ, 2010, CONSERV GENET, V11, P1547, DOI 10.1007/s10592-009-9928-7; Cre…	58	0	0	6	6	BRIGHAM YOUNG UNIV	PROVO	290 LIFE SCIENCE MUSEUM, PROVO, UT 84602 USA	1527-0904	1944-8341		WEST N AM NATURALIST	West. North Am. Naturalist	AUG	2015	75	2
J	McDonald, PS; Grason, E; Adams, J; Litle, K				McDonald, P. Sean; Grason, Emily; Adams, Jeffrey; Litle, Kate			OF NEEDLES AND HAYSTACKS: HABITAT MAPPING AND CITIZEN SCIENCE TO MONITOR FOR EUROPEAN GREEN CRAB IN WASHINGTON STATE	JOURNAL OF SHELLFISH RESEARCH			English	Meeting Abstract									[McDonald, P. Sean] Univ Washington, Sch Aquat & Fishery Sci, Program Environm, Seattle, WA 98195 USA; [Grason, Emily] Univ Washington, Dept Biol, Seattle, WA 98195 USA; [Adams, Jeffrey; Litle, Kate] Univ Washington, Washington Sea Grant, Seattle, WA 98195 USA								0	0	0	7	7	NATL SHELLFISHERIES ASSOC	GROTON	C/O DR. SANDRA E. SHUMWAY, UNIV CONNECTICUT, 1080 SHENNECOSSETT RD, GROTON, CT 06340 USA	0730-8000	1943-6319		J SHELLFISH RES	J. Shellfish Res.	AUG	2015	34	2
J	Mohammadi, N; Malek, M				Mohammadi, Nazila; Malek, Mohammadreza			VGI and Reference Data Correspondence Based on Location-Orientation Rotary Descriptor and Segment Matching	TRANSACTIONS IN GIS			English	Article							VOLUNTEERED GEOGRAPHIC INFORMATION; SPATIAL DATA SETS; OPENSTREETMAP; NETWORKS; FEATURES; COMPLETENESS; QUALITY; OSM	Volunteered geographic information (VGI) is spatial data that has been contributed by numerous volunteers in the form of user-generated content. VGI provides the ability for non-experts to collect and share geographic information. Comparison of a VGI dataset with a reference dataset in order to find data correspondence is a common process in some analyses of VGI data, such as quantitative analysi…	[Mohammadi, Nazila; Malek, Mohammadreza] KN Toosi Univ Technol, Tehran 1996715433, Iran	Mohammadi, N (reprint author), KN Toosi Univ Technol, Dept Geog Informat Syst, Fac Geodesy & Geomat Engn, 1346,Mirdamad Cross,Valiasr St, Tehran 1996715433, Iran.	nazila.mohamadi@gmail.com					Belongie S, 2002, IEEE T PATTERN ANAL, V24, P509, DOI 10.1109/34.993558; Zielstra D, 2013, T GIS, V17, P315, DOI 10.1111/tgis.12037; Brown M, 2011, IEEE T PATTERN ANAL, V33, P43, DOI 10.1109/TPAMI.2010.54; Hagenauer J, 2012, INT J GEOGR INF SCI, V26, P963, DOI 10.1080/13658816.2011.619501; Koukoletsos T, 2012, T GIS, V16, P477, DOI 10.1111/j.1467-9671.2012.01304.x; Graser A, 2014, T GIS, V18, P51…	46	0	0	1	1	WILEY-BLACKWELL	HOBOKEN	111 RIVER ST, HOBOKEN 07030-5774, NJ USA	1361-1682	1467-9671		T GIS	Trans. GIS	AUG	2015	19	4
J	Hester, K; Mullins, M; Murphy, F; Tofail, SAM				Hester, Karena; Mullins, Martin; Murphy, Finbarr; Tofail, Syed A. M.			Anticipatory Ethics and Governance (AEG): Towards a Future Care Orientation Around Nanotechnology	NANOETHICS			English	Article						Anticipatory ethics and governance; Future care orientation; Nanotechnology; Public participation and engagement; Procedural and distributive justice; Regulation; Responsibility; Social and ethical issues (SEI); Soft law; Uncertainty	EMERGING TECHNOLOGIES; NANOSCALE; RISK; LAW	Nanotechnology (NT) presents significant challenges in terms of developing a regulatory framework. This is due to a lack of scientific knowledge about the behaviour of the technology in its interactions with biological and ecological processes, the environment and other technologies. Crucially, there is a great deal of uncertainty surrounding the potential environmental and human health and safet…	[Hester, Karena; Mullins, Martin; Murphy, Finbarr] Univ Limerick, Kemmy Business Sch, Dept Accounting & Finance, Limerick, Ireland; [Tofail, Syed A. M.] Univ Limerick, Dept Phys & Energy, Limerick, Ireland; [Tofail, Syed A. M.] Univ Limerick, MSSI, Limerick, Ireland	Hester, K (reprint author), Univ Limerick, Kemmy Business Sch, Dept Accounting & Finance, Limerick, Ireland.	karena.hester@ul.ie			European Community's Seventh Framework Programme FP7 [604305]	The research leading to this article has received funding from the European Community's Seventh Framework Programme FP7 under grant agreement no. 604305, SUN (www.sun-fp7.eu/)	Allenby BR, 2011, INT LIBR ETH LAW TEC, V7, P3, DOI 10.1007/978-94-007-1356-7_1; Hodge GA, 2014, SCI PUBL POLICY, V41, P1, DOI 10.1093/scipol/sct029; Dorbeck-Jung B, 2013, NANOETHICS, V7, P55, DOI 10.1007/s11569-013-0172-8; Macnaghten P, 2010, ENVIRON PLANN A, V42, P23, DOI 10.1068/a41349; [Anonymous], 2010, PRESIDENTIAL COMMISS; Groves C, 2011, J BUS ETHICS, V101, P525, DOI 10.1007/s10551-010-07…	73	0	0	14	14	SPRINGER	DORDRECHT	VAN GODEWIJCKSTRAAT 30, 3311 GZ DORDRECHT, NETHERLANDS	1871-4757	1871-4765		NANOETHICS	NanoEthics	AUG	2015	9	2
J	Deplazes-Zemp, A; Gregorowius, D; Biller-Andorno, N				Deplazes-Zemp, Anna; Gregorowius, Daniel; Biller-Andorno, Nikola			Different Understandings of Life as an Opportunity to Enrich the Debate About Synthetic Biology	NANOETHICS			English	Article						Synthetic biology; Biotechnology; Gene technology; Life; Artificial life; World views; Public dialogue; Public engagement; ELSA; RRI	ARTIFICIAL LIFE; GENE TECHNOLOGY; EXPRESSION; FREEDOM; SCIENCE; GENOME; PLANTS; CELL	Comments and reports on synthetic biology often focus on the idea that this field may lead to synthetic life or life forms. Such claims attract general attention because "life" is a basic concept that is understood, interpreted and explained in multiple ways. While these different understandings of life may influence the ethical assessment of synthetic biology by experts and the public, this fiel…	[Deplazes-Zemp, Anna; Gregorowius, Daniel; Biller-Andorno, Nikola] Univ Zurich, Inst Biomed Eth & Hist Med, CH-8032 Zurich, Switzerland	Deplazes-Zemp, A (reprint author), Univ Zurich, Inst Biomed Eth & Hist Med, Pestalozzistr 24, CH-8032 Zurich, Switzerland.	deplazes@ethik.uzh.ch			Swiss National Science Foundation as part of the NCCR Molecular Systems Engineering; European Commission's Science in Society Programme of Framework Programme 7 as part of the SYBHEL project: Synthetic Biology for Human Health: Ethical and Legal Issues [SiS-2008-1.1.2.1-230401]	We would like to thank Sarah Chan, Joachim Boldt, Sune Holm, Markus Schmidt, and Donald Bruce for interesting discussions from which we have drawn for this article and Heather Bradshaw and two anonymous reviewers for their valuable comments on an earlier version of the manuscript. This publication is supported by the Swiss National Science Foundation as part of the NCCR Molecular Systems Engineer…	Davies S, 2009, PUBLIC UNDERST SCI, V18, P338, DOI 10.1177/0963662507079760; Buchanan A, 2002, SOC PHILOS POLICY, V19, P126, DOI 10.1017/S0265052502192065; Owen R, 2012, SCI PUBL POLICY, V39, P751, DOI 10.1093/scipol/scs093; Carr PA, 2009, NAT BIOTECHNOL, V27, P1151, DOI 10.1038/nbt.1590; Comstock G, 2010, FOOD ETHICS, P49, DOI 10.1007/978-1-4419-5765-8_4; Gregorowius D, 2012, J AGR ENVIRON ETHIC…	46	0	0	4	4	SPRINGER	DORDRECHT	VAN GODEWIJCKSTRAAT 30, 3311 GZ DORDRECHT, NETHERLANDS	1871-4757	1871-4765		NANOETHICS	NanoEthics	AUG	2015	9	2
J	Dunlap, MA; Tang, AHT; Greenberg, S				Dunlap, Matthew A.; Tang, Anthony Hoi Tin; Greenberg, Saul			Applying geocaching principles to site-based citizen science and eliciting reactions via a technology probe	PERSONAL AND UBIQUITOUS COMPUTING			English	Article						Citizen science; location-dependent applications; Geocaching; Pervasive computing		Site-based citizen science occurs when volunteers work with scientists to collect data at particular field locations. The benefit is greater data collection at lesser cost. Yet difficulties exist. We developed ScienceCaching, a prototype citizen science aid designed to mitigate four specific problems by applying aspects from another thriving location-based activity: geocaching as enabled by mobil…	[Dunlap, Matthew A.; Tang, Anthony Hoi Tin; Greenberg, Saul] Univ Calgary, Dept Comp Sci, Calgary, AB T2N 1N4, Canada	Greenberg, S (reprint author), Univ Calgary, Dept Comp Sci, Calgary, AB T2N 1N4, Canada.	matthew.a.dunlap@gmail.com; tonyt@ucalgary.ca; saul.greenberg@ucalgary.ca			NSERC (National Science and Engineering Research Council of Canada); AITF (Alberta Innovates Technology Futures)	Our participants deserve special thanks, as each spent considerable time discussing our project with us as well as their visions for how technology can help them. Funding provided by NSERC (National Science and Engineering Research Council of Canada) and AITF (Alberta Innovates Technology Futures).	Kittur A, 2008, CSCW: 2008 ACM CONFERENCE ON COMPUTER SUPPORTED COOPERATIVE WORK, CONFERENCE PROCEEDINGS, P37; Cohn JP, 2008, BIOSCIENCE, V58, P192, DOI 10.1641/B580303; Huang KL, 2010, MSWIM 2010: PROCEEDINGS OF THE 13TH ACM INTERNATIONAL CONFERENCE ON MODELING, ANALYSIS, AND SIMULATION OF WIRELESS AND MOBILE SYSTEMS, P14; Silvertown J, 2009, TRENDS ECOL EVOL, V24, P467, DOI 10.1016/j.tree.2009.…	26	0	0	10	10	SPRINGER LONDON LTD	LONDON	236 GRAYS INN RD, 6TH FLOOR, LONDON WC1X 8HL, ENGLAND	1617-4909	1617-4917		PERS UBIQUIT COMPUT	Pers. Ubiquitous Comput.	AUG	2015	19	2015-05-06
J	White, RL; Sutton, AE; Salguero-Gomez, R; Bray, TC; Campbell, H; Cieraad, E; Geekiyanage, N; Gherardi, L; Hughes, AC; Jorgensen, PS; Poisot, T; DeSoto, L; Zimmerman, N				White, Rachel L.; Sutton, Alexandra E.; Salguero-Gomez, Roberto; Bray, Timothy C.; Campbell, Heather; Cieraad, Ellen; Geekiyanage, Nalaka; Gherardi, Laureano; Hughes, Alice C.; Jorgensen, Peter Sogaard; Poisot, Timothee; DeSoto, Lucia; Zimmerman, Naupaka			The next generation of action ecology: novel approaches towards global ecological research	ECOSPHERE			English	Article						action ecology; applied ecology; big data; citizen science; environmental leadership; environmental management; ESA Centennial Paper; planetary stewardship; training; transdisciplinary; translational ecology	OPEN-ACCESS; CITIZEN SCIENCE; DATA-MANAGEMENT; BIG DATA; CONSERVATION; PUBLICATION; CHALLENGES; SYSTEMS; TOOL; OPPORTUNITIES	Advances in the acquisition and dissemination of knowledge over the last decade have dramatically reshaped the way that ecological research is conducted. The advent of large, technology-based resources such as iNaturalist, Genbank, or the Global Biodiversity Information Facility (GBIF) allow ecologists to work at spatio-temporal scales previously unimaginable. This has generated a new approach in…	[White, Rachel L.; Sutton, Alexandra E.; Salguero-Gomez, Roberto; Bray, Timothy C.; Campbell, Heather; Cieraad, Ellen; Geekiyanage, Nalaka; Gherardi, Laureano; Hughes, Alice C.; Jorgensen, Peter Sogaard; Poisot, Timothee; DeSoto, Lucia; Zimmerman, Naupaka] Univ Brighton, Int Network Next Generat Ecologists, Brighton BN2 4GJ, E Sussex, England; [White, Rachel L.] Univ Brighton, Biol & Biomed Sci D…	White, RL (reprint author), Univ Brighton, Int Network Next Generat Ecologists, Brighton BN2 4GJ, E Sussex, England.	r.white2@brighton.ac.uk					Aarssen L. W., 2012, IDEAS ECOLOGY EVOLUT, V5, P9; Aarssen L. W., 2008, IDEAS ECOLOGY EVOLUT, V1, P1, DOI 10.4033/iee.2008.1.1.e; African Development Bank Group, 2013, OP DAT AFR; Alberts B, 2008, SCIENCE, V321, P15, DOI 10.1126/science.1162115; Balmford A, 2002, SCIENCE, V297, P950, DOI 10.1126/science.1073947; May RM, 2008, NATURE, V451, P893, DOI 10.1038/451893a; Lawrence PA, 2003, NATURE, V42…	106	0	0	42	42	ECOLOGICAL SOC AMER	WASHINGTON	1990 M STREET NW, STE 700, WASHINGTON, DC 20036 USA	2150-8925			ECOSPHERE	Ecosphere	AUG	2015	6	8
J	Blue, G				Blue, Gwendolyn			Representing Global Public Concern: A Critical Analysis of the Danish Participatory Experiment on Climate Change	ENVIRONMENTAL VALUES			English	Article						Public engagement; mini-publics; climate change; science; democracy	TECHNOLOGY; CITIZENS	Drawing on the recognition that questions of discourse and power are vital components in analysing the public participation in environmental governance, this paper examines the ways in which dominant scientific discourses about the Earth's climate inform the types of public talk facilitated in and by mini-publics, particularly when they are 'scaled up' to address environmental issues such as clim…	Univ Calgary, Dept Geog, Calgary, AB T2N 1N4, Canada	Blue, G (reprint author), Univ Calgary, Dept Geog, ES 322 2500 Univ Dr, Calgary, AB T2N 1N4, Canada.	ggblue@ucalgary.ca					Agger A., 2012, CITIZEN PARTICIPATIO, P45; Andersson E., 2012, CITIZEN PARTICIPATIO, P70; Adger WN, 2011, GLOBAL ENVIRON POLIT, V11, P1; Jasanoff S, 1999, ENVIRON VALUE, V8, P135, DOI 10.3197/096327199129341761; Fishkin JS, 2005, ACTA POLIT, V40, P284, DOI 10.1057/palgrave.ap.5500121; Einsiedel EF, 2001, PUBLIC UNDERST SCI, V10, P83; Boykoff MT, 2004, GLOBAL ENVIRON CHANG, V14, P125, DOI 10.1016/…	48	1	1	5	5	WHITE HORSE PRESS	ISLE OF HARRIS	1 STROND, ISLE OF HARRIS HS5 3UD, ENGLAND	0963-2719	1752-7015		ENVIRON VALUE	Environ. Values	AUG	2015	24	4
J	Mabon, L; Shackley, S				Mabon, Leslie; Shackley, Simon			Meeting the Targets or Re-Imagining Society? An Empirical Study into the Ethical Landscape of Carbon Dioxide Capture and Storage in Scotland	ENVIRONMENTAL VALUES			English	Article						Carbon dioxide capture and storage (CCS); climate change; environmental ethics; epistemic justice; ethics of science and technology	PUBLIC ENGAGEMENT; JUSTICE; UK	Preston's (2011) challenge to the moral presumption against geoengineering is applied to carbon dioxide capture and storage (CCS) in Scotland, United Kingdom. Qualitative data is analysed to assess if and how Preston's arguments play out in practice. We argue that the concepts of 'lesser evil' and prioritising human well-being over non-interference in natural processes do bring different value po…	[Mabon, Leslie; Shackley, Simon] Univ Edinburgh, Sch Geosci, Edinburgh EH8 9XP, Midlothian, Scotland	Mabon, L (reprint author), Robert Gordon Univ, Sch Appl Social Studies, Aberdeen AB10 7QG, Scotland.	l.j.mabon@rgu.ac.uk; simon.shackley@ed.ac.uk		Mabon, Leslie/0000-0003-2646-6119	European Union [265847]; UK CCS Research Centre; Center for Applied Ethics and Philosophy, Hokkaido University	The research leading to these results has received funding from the European Union Seventh Framework Programme [FP7/2007-2013] under grant agreement no 265847: ECO<INF>2</INF> - Sub-seabed CO<INF>2</INF> Storage: Impact on Marine Ecosystems. Use of data from the EU FP7 Site Char and NERC QICS projects was possible due to respective Memoranda of Understanding between ECO<INF>2</INF> and these proj…	Anderson E, 2012, SOC EPISTEMOL, V26, P163, DOI 10.1080/02691728.2011.652211; de Best-Waldhober M, 2009, INT J GREENH GAS CON, V3, P322, DOI 10.1016/j.ijggc.2008.09.001; Wynne B, 2006, COMMUNITY GENET, V9, P211, DOI 10.1159/000092659; Brandani S, 2012, ENERG ENVIRON-UK, V23, P319; Gardiner SM, 2006, ENVIRON VALUE, V15, P397, DOI 10.3197/096327106778226293; Timilsina GR, 2013, ENERG POLICY, V61, P…	43	1	1	9	9	WHITE HORSE PRESS	ISLE OF HARRIS	1 STROND, ISLE OF HARRIS HS5 3UD, ENGLAND	0963-2719	1752-7015		ENVIRON VALUE	Environ. Values	AUG	2015	24	4
J	Norman, AJ; Spong, G				Norman, Anita J.; Spong, Goran			Single nucleotide polymorphism-based dispersal estimates using noninvasive sampling	ECOLOGY AND EVOLUTION			English	Article						Carnivore; citizen science; isolation-by-distance; natal dispersal; pedigree reconstruction; SNPs; Ursus arctos	ESTIMATING POPULATION-SIZE; LONG-DISTANCE DISPERSAL; BEAR URSUS-ARCTOS; CITIZEN SCIENCE; BROWN BEARS; NATURAL-POPULATIONS; MOLECULAR MARKERS; GENETIC-ANALYSIS; NATAL DISPERSAL; GRIZZLY BEARS	Quantifying dispersal within wild populations is an important but challenging task. Here we present a method to estimate contemporary, individual-based dispersal distance from noninvasively collected samples using a specialized panel of 96 SNPs (single nucleotide polymorphisms). One main issue in conducting dispersal studies is the requirement for a high sampling resolution at a geographic scale …	[Norman, Anita J.; Spong, Goran] Swedish Univ Agr Sci, Dept Wildlife Fish & Environm Studies, Mol Ecol Grp, SE-90183 Umea, Sweden	Norman, AJ (reprint author), Swedish Univ Agr Sci, Dept Wildlife Fish & Environm Studies, Mol Ecol Grp, SE-90183 Umea, Sweden.	anita.norman@slu.se			Stifelsen Mauritz Carlgrens Fond, Helge Ax:son Johnsons stiftelse	Funding supported in part by Stifelsen Mauritz Carlgrens Fond, Helge Ax:son Johnsons stiftelse.	Waits LP, 2005, J WILDLIFE MANAGE, V69, P1419, DOI 10.2193/0022-541X(2005)69[1419:NGSTFW]2.0.CO;2; Lynch M, 1999, GENETICS, V152, P1753; Palsboll PJ, 2013, MOL ECOL, V22, P22, DOI 10.1111/mec.12094; Trakhtenbrot A, 2005, DIVERS DISTRIB, V11, P173, DOI 10.1111/j.1366-9516.2005.00156.x; Jombart T, 2011, BIOINFORMATICS, V27, P3070, DOI 10.1093/bioinformatics/btr521; Nathan R, 2003, OIKOS, V103, P261…	56	0	0	15	15	WILEY-BLACKWELL	HOBOKEN	111 RIVER ST, HOBOKEN 07030-5774, NJ USA	2045-7758			ECOL EVOL	Ecol. Evol.	AUG	2015	5	15
J	Higgins, O; Shackleton, CM				Higgins, Olivia; Shackleton, Charlie M.			The benefits from and barriers to participation in civic environmental organisations in South Africa	BIODIVERSITY AND CONSERVATION			English	Article						Non-profit; Perceptions; Time; Value; Volunteering	CITIZEN SCIENCE; VOLUNTEERS; MOTIVATIONS; BIODIVERSITY; PROGRAMS; AGENDA	With growing global public awareness of a wide range of conservation and environmental issues, environmental volunteerism is increasing. In order to attract and retain volunteers, it is useful to understand what benefits they hope for as well as the barriers that hinder their participation. Here we examine the benefits from and barriers to participation in 26 conservation and environmental civic …	[Higgins, Olivia; Shackleton, Charlie M.] Rhodes Univ, Dept Environm Sci, ZA-6140 Grahamstown, South Africa	Shackleton, CM (reprint author), Rhodes Univ, Dept Environm Sci, ZA-6140 Grahamstown, South Africa.	c.shackleton@ru.ac.za			South African Research Chairs Initiative of the Department of Science and Technology; National Research Foundation of South Africa	We would like to thank all the volunteers and organisers who participated. The field costs were provided by the South African Research Chairs Initiative of the Department of Science and Technology and the National Research Foundation of South Africa. Any opinion, finding, conclusion or recommendation expressed in this material is that of the authors and the NRF does not accept any liability in th…	Brooks TM, 2006, SCIENCE, V313, P58, DOI 10.1126/science.1127609; Morrow-Howell N, 2009, GERONTOLOGIST, V49, P91, DOI 10.1093/geront/gnp007; Bruyere B, 2007, J ENVIRON PLANN MAN, V50, P503, DOI 10.1080/09640560701402034; Measham T, 2008, AUST GEOGR, V39, P537, DOI 10.1080/00049180802419237; Foster-Smith J, 2003, BIOL CONSERV, V113, P199, DOI 10.1016/S0006-3207(02)00373-7; Bell S, 2008, BIODIVERS …	42	0	0	12	12	SPRINGER	DORDRECHT	VAN GODEWIJCKSTRAAT 30, 3311 GZ DORDRECHT, NETHERLANDS	0960-3115	1572-9710		BIODIVERS CONSERV	Biodivers. Conserv.	AUG	2015	24	8
J	Kahlor, LA; Dudo, A; Liang, MC; AbiGhannam, N				Kahlor, Lee Ann; Dudo, Anthony; Liang, Ming-Ching; AbiGhannam, Niveen			What are you saying? Challenges and opportunities for increasing visibility and understanding of indoor microbiological research	INDOOR AND BUILT ENVIRONMENT			English	Article						Science communication; Public communication of science and technology; Science outreach; Indoor microbiology; Built environment	PUBLIC ENGAGEMENT; ENVIRONMENTAL-POLICY; MASS-COMMUNICATION; SCIENCE; SCIENTISTS; CAUSALITY; HEALTH; MODEL	This study identifies challenges that microbiologists who study built environments face in their efforts to increase public understanding and visibility associated with their research. More specifically, it offers an empirical assessment of these scientists' perceptions of what people need to understand - specific research terms and concepts are noted - and what needs to be considered when commun…	[Kahlor, Lee Ann; Dudo, Anthony; Liang, Ming-Ching; AbiGhannam, Niveen] Univ Texas Austin, Moody Coll Commun, Dept Advertising & Publ Relat, Austin, TX 78712 USA	Kahlor, LA (reprint author), Univ Texas Austin, Moody Coll Commun, Dept Advertising & Publ Relat, 300 West Dean Keeton, Austin, TX 78712 USA.	kahlor@austin.utexas.edu			Alfred P. Sloan foundation [2010-5-21 IE]	This study was funded by the Alfred P. Sloan foundation, grant no. 2010-5-21 IE.	Logan RA, 2001, SCI COMMUN, V23, P135, DOI 10.1177/1075547001023002004; Bryant J, 2004, J COMMUN, V54, P662, DOI 10.1093/joc/54.4.662; Weigold MF, 2001, SCI COMMUN, V23, P164, DOI 10.1177/1075547001023002005; Steel B, 2004, ENVIRON SCI POLICY, V7, P1, DOI 10.1016/j.envsci.2003.10.004; Sturgis P, 2004, PUBLIC UNDERST SCI, V13, P55, DOI 10.1177/0963662504042690; Kahlor L, 2010, HEALTH COMMUN, V25, …	29	0	0	9	9	SAGE PUBLICATIONS LTD	LONDON	1 OLIVERS YARD, 55 CITY ROAD, LONDON EC1Y 1SP, ENGLAND	1420-326X	1423-0070		INDOOR BUILT ENVIRON	Indoor Built Environ.	AUG	2015	24	5
J	Sleenhoff, S; Landeweerd, L; Osseweijer, P				Sleenhoff, Susanne; Landeweerd, Laurens; Osseweijer, Patricia			Bio-basing society by including emotions	ECOLOGICAL ECONOMICS			English	Article						Bio-based economy; Emotions; Public engagement; Bio-based society	INDUSTRIAL BIOTECHNOLOGY; CLIMATE-CHANGE; PUBLIC ENGAGEMENT; ECONOMY; SCIENCE; RISK; PARTICIPATION; COMMUNICATION; TECHNOLOGIES; GENOMICS	A bio-based economy needs a bio-minded society since the required actions are of a collective scale. Engagement of civic society is crucial but disregarded by some of the advocates of the bio-based turn. Connecting society to this complex transition is difficult and so far insufficient. Technocratic one-directional communication strategies that aim to nurture public trust and support for the tran…	[Sleenhoff, Susanne; Landeweerd, Laurens; Osseweijer, Patricia] Delft Univ Technol, Dept Biotechnol, Sect Biotechnol & Soc, Fac Sci Appl, NL-2628BC Delft, Netherlands; [Sleenhoff, Susanne; Osseweijer, Patricia] CSG Ctr Soc & Life Sci, NL-6500 GL Nijmegen, Netherlands; [Sleenhoff, Susanne; Osseweijer, Patricia] Kluyver Ctr Genom Ind Fermentat, NL-2600GA Delft, Netherlands; [Landeweerd, Laurens] Ra…	Sleenhoff, S (reprint author), Delft Univ Technol, Dept Biotechnol, Sect Biotechnol & Soc, Julianalaan 67, NL-2628BC Delft, Netherlands.	s.sleenhoff@tudelft.nl; l.landeweerd@science.ru.nl; p.osseweijer@tudelft.nl			Netherlands Genomics Initiative/Netherlands Organization for Scientific Research	Special thanks are due to Julian Kinderlerer and Annick Hedlund-de Witt and two anonymous reviewers for their helpful comments and suggestions to earlier drafts of this paper. The authors are based at Delft University of Technology, Department of Biotechnology, Section Biotechnology & Society (BTS). This article is the result of a research project of the CSG Centre for Society and the Life Scienc…	Frame B, 2008, ECOL ECON, V65, P225, DOI 10.1016/j.ecolecon.2007.11.010; Kahan D, 2010, NATURE, V463, P296, DOI 10.1038/463296a; [Anonymous], 2002, CONSTELLATIONS, DOI 10.1111/1467-8675.00269; Loewenstein GF, 2001, PSYCHOL BULL, V127, P267, DOI 10.1037//0033-2909.127.2.267; RITTEL HWJ, 1973, POLICY SCI, V4, P155, DOI 10.1007/BF01405730; Levidow L, 2013, SCI TECHNOL HUM VAL, V38, P94, DOI 10.1177/…	86	0	0	7	7	ELSEVIER SCIENCE BV	AMSTERDAM	PO BOX 211, 1000 AE AMSTERDAM, NETHERLANDS	0921-8009	1873-6106		ECOL ECON	Ecol. Econ.	AUG	2015	116
J	Crall, AW; Jarnevich, CS; Young, NE; Panke, BJ; Renz, M; Stohlgren, TJ				Crall, Alycia W.; Jarnevich, Catherine S.; Young, Nicholas E.; Panke, Brendon J.; Renz, Mark; Stohlgren, Thomas J.			Citizen science contributes to our knowledge of invasive plant species distributions	BIOLOGICAL INVASIONS			English	Article						Citizen science; Community-based monitoring; Data synergy; Environmental monitoring; Habitat suitability models; Volunteer monitoring	DISTRIBUTION MODELS; ECOLOGICAL RESEARCH; DATA QUALITY; VALIDATION; VOLUNTEERS; ACCURACY; NETWORKS	Citizen science is commonly cited as an effective approach to expand the scale of invasive species data collection and monitoring. However, researchers often hesitate to use these data due to concerns over data quality. In light of recent research on the quality of data collected by volunteers, we aimed to demonstrate the extent to which citizen science data can increase sampling coverage, fill g…	[Crall, Alycia W.; Panke, Brendon J.; Renz, Mark] Univ Wisconsin, Dept Agron, Madison, WI 53706 USA; [Crall, Alycia W.] Virginia Tech, Dept Forest Resources & Environm Conservat, Charlottesville, VA 22902 USA; [Jarnevich, Catherine S.; Stohlgren, Thomas J.] US Geol Survey, Ft Collins Sci Ctr, Ft Collins, CO 80526 USA; [Young, Nicholas E.] Colorado State Univ, Nat Resource Ecol Lab, Ft Collins, CO…	Crall, AW (reprint author), Virginia Tech, Dept Forest Resources & Environm Conservat, 460 Stagecoach Rd, Charlottesville, VA 22902 USA.	acrall@vt.edu			National Science Foundation [OCI-0636213]; National Park Service, Great Lakes Restoration Initiative; North Central Integrated Pest Management Center; USGS invasive species science program	This work was funded by the National Science Foundation under grant number OCI-0636213, the National Park Service as part of the Great Lakes Restoration Initiative, the North Central Integrated Pest Management Center, and the USGS invasive species science program. Logistical support was provided by the USGS Fort Collins Science Center, the Department of Agronomy at the University of Wisconsin-Mad…	Stohlgren TJ, 2006, RISK ANAL, V26, P163, DOI 10.1111/j.1539-6924.2006.00707.x; Brandon A, 2003, NAT AREA J, V23, P254; Delaney DG, 2008, BIOL INVASIONS, V10, P117, DOI 10.1007/s10530-007-9114-0; Whitelaw G, 2003, ENVIRON MONIT ASSESS, V88, P409, DOI 10.1023/A:1025545813057; Gallo T, 2011, BIOSCIENCE, V61, P459, DOI 10.1525/bio.2011.61.6.8; Larkin DJ, 2012, BIOL INVASIONS, V14, P827, DOI 10.1007/…	39	0	0	45	45	SPRINGER	DORDRECHT	VAN GODEWIJCKSTRAAT 30, 3311 GZ DORDRECHT, NETHERLANDS	1387-3547	1573-1464		BIOL INVASIONS	Biol. Invasions	AUG	2015	17	8
J	Goswami, VR; Medhi, K; Nichols, JD; Oli, MK				Goswami, Varun R.; Medhi, Kamal; Nichols, James D.; Oli, Madan K.			Mechanistic understanding of human-wildlife conflict through a novel application of dynamic occupancy models	CONSERVATION BIOLOGY			English	Article						citizen science; crop and livestock depredation; detection probability; elephants; human-dominated landscapes; monitoring; predictive modeling; ciencia ciudadana; depredacion de cultivos y ganado; deteccion de probabilidad; elefantes; modelado predictivo; monitoreo; terrenos dominados por humanos	HUMAN-ELEPHANT CONFLICT; PROTECTED AREAS; SITE-OCCUPANCY; PATTERNS; COMPENSATION; NEIGHBORHOOD; POPULATIONS; DEPREDATION; EXTINCTION; SELECTION	Crop and livestock depredation by wildlife is a primary driver of human-wildlife conflict, a problem that threatens the coexistence of people and wildlife globally. Understanding mechanisms that underlie depredation patterns holds the key to mitigating conflicts across time and space. However, most studies do not consider imperfect detection and reporting of conflicts, which may lead to incorrect…	[Goswami, Varun R.; Oli, Madan K.] Univ Florida, Sch Nat Resources & Environm, Gainesville, FL 32611 USA; [Goswami, Varun R.; Oli, Madan K.] Univ Florida, Dept Wildlife Ecol & Conservat, Gainesville, FL 32611 USA; [Goswami, Varun R.] Wildlife Conservat Soc, India Program, Bengaluru 560070, India; [Medhi, Kamal] Samrakshan Trust, Baghmara 794102, Meghalaya, India; [Nichols, James D.] US Geol Surve…	Goswami, VR (reprint author), Wildlife Conservat Soc, India Program, 1669 31st Cross 16th Main,Banashankari 2nd Stage, Bengaluru 560070, India.	varunr.goswami@gmail.com		Goswami, Varun/0000-0003-2575-7301	U.S. Fish and Wildlife Service - Asian Elephant Conservation Fund; WWF - Asian Rhino and Elephant Action Strategy; International Union for Conservation of Nature (IUCN)'s Sir Peter Scott Fund; Ashoka Trust for Research in Ecology and the Environment; University of Florida Alumni Fellowship	We record our sincere gratitude to the U.S. Fish and Wildlife Service - Asian Elephant Conservation Fund, WWF - Asian Rhino and Elephant Action Strategy, International Union for Conservation of Nature (IUCN)'s Sir Peter Scott Fund, Ashoka Trust for Research in Ecology and the Environment, and the University of Florida Alumni Fellowship for financial support; Samrakshan Trust for logistical suppor…	Karanth KK, 2013, BIOL CONSERV, V166, P175, DOI 10.1016/j.biocon.2013.06.027; Karanth KK, 2009, J APPL ECOL, V46, P1189, DOI 10.1111/j.1365-2664.2009.01710.x; Treves A, 2003, CONSERV BIOL, V17, P1491, DOI 10.1111/j.1523-1739.2003.00059.x; Naughton-Treves L, 2003, CONSERV BIOL, V17, P1500, DOI 10.1111/j.1523-1739.2003.00060.x; MacKenzie DI, 2003, ECOLOGY, V84, P2200, DOI 10.1890/02-3090; Webber CE…	34	1	1	21	21	WILEY-BLACKWELL	HOBOKEN	111 RIVER ST, HOBOKEN 07030-5774, NJ USA	0888-8892	1523-1739		CONSERV BIOL	Conserv. Biol.	AUG	2015	29	4
J	White, ER; Myers, MC; Flemming, JM; Baum, JK				White, Easton R.; Myers, Mark C.; Flemming, Joanna Mills; Baum, Julia K.			Shifting elasmobranch community assemblage at Cocos Islandan isolated marine protected area	CONSERVATION BIOLOGY			English	Article						citizen science; eastern tropical Pacific; fisheries; generalized linear mixed models; marine reserve; MPA; sharks; zero-inflated; AMP; cero inflacion; ciencia ciudadana; modelos lineales mixtos generalizados; Pacifico oriental tropical; reserva marina; tiburones	SHARK BYCATCH; PACIFIC; CONSERVATION; RESERVES; POPULATIONS; INSIGHTS; FISH; MANAGEMENT; ECOLOGY; DESIGN	Fishing pressure has increased the extinction risk of many elasmobranch (shark and ray) species. Although many countries have established no-take marine reserves, a paucity of monitoring data means it is still unclear if reserves are effectively protecting these species. We examined data collected by a small group of divers over the past 21 years at one of the world's oldest marine protected area…	[White, Easton R.; Baum, Julia K.] Univ Victoria, Dept Biol, Victoria, BC V8W 2Y2, Canada; [Myers, Mark C.] Univ No Iowa, Dept Biol, Cedar Falls, IA 50614 USA; [Flemming, Joanna Mills] Dalhousie Univ, Dept Math & Stat, Halifax, NS B3H 4R2, Canada	White, ER (reprint author), Ctr Populat Biol, 2320 Storer Hall,1 Shields Ave, Davis, CA 95616 USA.	eawhite@ucdavis.edu		White, Easton/0000-0002-0768-9555	Fulbright Canada Award; Natural Sciences and Engineering Research Council of Canada; Alfred P. Sloan Foundation	We thank all the divers and crew members who have worked for the Undersea Hunter dive company over the past 2 decades. We are grateful to A. Klapfer, owner of Undersea Hunter, and C. Vaughan for having the foresight to initiate data collection. We also thank S. Hawkins-Pinchers, J. Holden, J. McDevitt-Irwin, M. Nikoo, and M. Sullivan for their assistance in entering data and finding literature. W…	Alvarado JJ, 2012, REV BIOL TROP, V60, P129; Bessudo S, 2011, ENVIRON BIOL FISH, V91, P165, DOI 10.1007/s10641-011-9769-3; Edgar GJ, 2014, NATURE, V506, P216, DOI 10.1038/nature13022; Minami M, 2007, FISH RES, V84, P210, DOI 10.1016/j.fishres.2006.10.019; Baskett ML, 2007, BIOL CONSERV, V137, P163, DOI 10.1016/j.biocon.2007.02.013; Hooker SK, 2004, BIOSCIENCE, V54, P27, DOI 10.1641/0006-3568(2004…	52	0	0	46	46	WILEY-BLACKWELL	HOBOKEN	111 RIVER ST, HOBOKEN 07030-5774, NJ USA	0888-8892	1523-1739		CONSERV BIOL	Conserv. Biol.	AUG	2015	29	4
J	McClintock, BT; Onorato, DP; Martin, J				McClintock, Brett T.; Onorato, Dave P.; Martin, Julien			Endangered Florida panther population size determined from public reports of motor vehicle collision mortalities	JOURNAL OF APPLIED ECOLOGY			English	Article						abundance; capture-recapture; citizen science; dead recovery; human-wildlife ecology; imperfect detection; mark-resight; Puma concolor coryi; risk of collision; telemetry	HABITAT SELECTION; BAYESIAN-ANALYSIS; CONSERVATION; DENSITY; MODELS; INFERENCE	Reliably estimating the abundance of rare or elusive animals is notoriously difficult. An archetypical example is the endangered Florida panther, whose conservation status is intrinsically linked to population size, but for which reliable abundance information is lacking across its range. This is due not only to the inherent difficulty of sampling a rare and elusive species over a large geographi…	[McClintock, Brett T.] NOAA NMFS Alaska Fisheries Sci Ctr, Natl Marine Mammal Lab, Seattle, WA 98115 USA; [Onorato, Dave P.] Florida Fish & Wildlife Conservat Commiss, Fish & Wildlife Res Inst, Naples, FL 34114 USA; [Martin, Julien] Florida Fish & Wildlife Conservat Commiss, Fish & Wildlife Res Inst, St Petersburg, FL 33701 USA	McClintock, BT (reprint author), NOAA NMFS Alaska Fisheries Sci Ctr, Natl Marine Mammal Lab, Seattle, WA 98115 USA.	brett.mcclintock@noaa.gov					Miller CR, 2003, P NATL ACAD SCI USA, V100, P4334, DOI 10.1073/pnas.0735531100; Kendall KC, 2008, J WILDLIFE MANAGE, V72, P1693, DOI 10.2193/2008-007; Hoenig JM, 1998, CAN J FISH AQUAT SCI, V55, P1466, DOI 10.1139/cjfas-55-6-1466; Onorato DP, 2011, ANIM CONSERV, V14, P196, DOI 10.1111/j.1469-1795.2010.00415.x; Chandler RB, 2013, ANN APPL STAT, V7, P936, DOI 10.1214/12-AOAS610; Land ED, 2008, J WI…	29	1	1	56	56	WILEY-BLACKWELL	HOBOKEN	111 RIVER ST, HOBOKEN 07030-5774, NJ USA	0021-8901	1365-2664		J APPL ECOL	J. Appl. Ecol.	AUG	2015	52	4
J	Santangeli, A; Arroyo, B; Millon, A; Bretagnolle, V				Santangeli, Andrea; Arroyo, Beatriz; Millon, Alexandre; Bretagnolle, Vincent			Identifying effective actions to guide volunteer-based and nationwide conservation efforts for a ground-nesting farmland bird	JOURNAL OF APPLIED ECOLOGY			English	Article						active management; agricultural intensification; Circus pygargus; citizen science; evidence-based conservation; nest predation; raptors	MONTAGUS HARRIER; VANELLUS-VANELLUS; INTENSIFICATION; PREDATION; BIODIVERSITY; POPULATIONS; PROTECTION; MANAGEMENT; LANDSCAPE; EXCLUSION	Modern farming practices threaten wildlife in different ways, and failure to identify the complexity of multiple threats acting in synergy may result in ineffective management. To protect ground-nesting birds in farmland, monitoring and mitigating impacts of mechanical harvesting is crucial. Here, we use 6years of data from a nationwide volunteer-based monitoring scheme of the Montagu's harrier, …	[Santangeli, Andrea] Univ Helsinki, Finnish Ctr Excellence Metapopulat Biol, Dept Biosci, FI-00014 Helsinki, Finland; [Santangeli, Andrea] Univ Helsinki, Finnish Museum Nat Hist, FI-00014 Helsinki, Finland; [Santangeli, Andrea] Univ Turku, Sect Ecol, Dept Biol, FI-20014 Turku, Finland; [Arroyo, Beatriz] CSIC UCLM JCCM, Inst Invest Recursos Cineget IREC, E-13005 Ciudad Real, Spain; [Millon, Alexan…	Santangeli, A (reprint author), Univ Helsinki, Finnish Ctr Excellence Metapopulat Biol, Dept Biosci, POB 65,Viikinkaari 1, FI-00014 Helsinki, Finland.	andrea.santangeli@helsinki.fi	Arroyo, Beatriz/A-3504-2013	Arroyo, Beatriz/0000-0002-4657-6609	Finnish School in Wildlife Biology, Conservation and Management (LUOVA); Kone Foundation	We thank the thousands of volunteers and farmers who have been helping and collaborating on this study, but more particularly J.-L. Bourrioux, T. Printemps and B. van Hecke for data and network management of the French Harriers programme and K. LeRest for GIS assistance and geostatistics. LPO Mission Rapaces (previously FIR) initiated and promoted for the last 40 years the conservation of harrier…	Ferraro PJ, 2006, PLOS BIOL, V4, P482, DOI 10.1371/journal.pbio.0040105; Arroyo B, 2002, ANIM CONSERV, V5, P283, DOI 10.1017/S1367943002004031; Salafsky N, 2002, CONSERV BIOL, V16, P1469, DOI 10.1046/j.1523-1739.2002.01232.x; Tilman D, 2011, P NATL ACAD SCI USA, V108, P20260, DOI 10.1073/pnas.1116437108; Smith RK, 2011, BIOL CONSERV, V144, P1, DOI 10.1016/j.biocon.2010.05.008; Gillis H, 2012, CAN…	39	0	0	14	14	WILEY-BLACKWELL	HOBOKEN	111 RIVER ST, HOBOKEN 07030-5774, NJ USA	0021-8901	1365-2664		J APPL ECOL	J. Appl. Ecol.	AUG	2015	52	4
J	Boyle, WA; Sigel, BJ				Boyle, W. Alice; Sigel, Bryan J.			Ongoing changes in the avifauna of La Selva Biological Station, Costa Rica: Twenty-three years of Christmas Bird Counts	BIOLOGICAL CONSERVATION			English	Article						Dispersal; Citizen science; Climate change; Extirpation; Physiological tolerance; Specialization	TROPICAL RAIN-FOREST; NORTH-AMERICAN-BIRDS; HABITAT FRAGMENTATION; INSECTIVOROUS BIRDS; NEOTROPICAL BIRDS; BODY-SIZE; COMMUNITY; BIODIVERSITY; DISPERSAL; TEMPERATURE	Tropical forest fragmentation influences community composition via differential species-level effects. Avian responses to fragmentation at La Selva Biological Station are, in part, responsible for the particular concern over the fate of understory insectivorous species. However, since the 1990s, much previously deforested land within and surrounding La Selva has reverted to forest, providing an o…	[Boyle, W. Alice] Kansas State Univ, Div Biol, Manhattan, KS 66506 USA; [Sigel, Bryan J.] Nevada State Coll, Dept Biol, Henderson, NV 89002 USA	Boyle, WA (reprint author), Kansas State Univ, Div Biol, 116 Ackert Hall, Manhattan, KS 66506 USA.	aboyle@ksu.edu		Sigel, Bryan/0000-0003-2345-9028			ALLEN CR, 1995, ECOL APPL, V5, P632, DOI 10.2307/1941972; American Ornithologists Union, 1998, CHECKL N AM BIRDS, V7th; Burney CW, 2009, AM NAT, V174, P358, DOI 10.1086/603613; Stratford JA, 2005, FRONT ECOL ENVIRON, V3, P91, DOI 10.2307/3868515; Blake JG, 2000, AUK, V117, P663, DOI 10.1642/0004-8038(2000)117[0663:DOBAAE]2.0.CO;2; GOMPPER ME, 1991, OECOLOGIA, V87, P343, DOI 10.1007/BF00634589; Si…	74	4	4	24	24	ELSEVIER SCI LTD	OXFORD	THE BOULEVARD, LANGFORD LANE, KIDLINGTON, OXFORD OX5 1GB, OXON, ENGLAND	0006-3207	1873-2917		BIOL CONSERV	Biol. Conserv.	AUG	2015	188				SI
J	Roy, HE; Brown, PMJ				Roy, Helen E.; Brown, Peter M. J.			Ten years of invasion: Harmonia axyridis (Pallas) (Coleoptera: Coccinellidae) in Britain	ECOLOGICAL ENTOMOLOGY			English	Review						Biological invasions; citizen science; intra-guild predation; invasive species; monitoring and surveillance; non-native species	ASIAN LADY BEETLE; WASP DINOCAMPUS-COCCINELLAE; ENEMY RELEASE HYPOTHESIS; HARLEQUIN LADYBIRD; INTRAGUILD PREDATION; NATIVE COCCINELLIDS; ADALIA-BIPUNCTATA; IMMATURE STAGES; GREAT-BRITAIN; SUCCESS	1. Harmonia axyridis was first recorded in Britain in 2004. Two subsequent earlier records were received from 2003. 2. The UK Ladybird Survey, a citizen science initiative involving online recording, was launched in 2005 to encourage people across Britain to track the spread of H. axyridis. Tens of thousands of people have provided records of H. axyridis and other species of ladybirds, creating a…	[Roy, Helen E.] Ctr Ecol & Hydrol, Crowmarsh Gifford OX10 8BB, Oxon, England; [Brown, Peter M. J.] Anglia Ruskin Univ, Dept Life Sci, Anim & Environm Res Grp, Cambridge, England	Roy, HE (reprint author), Ctr Ecol & Hydrol, Benson Lane, Crowmarsh Gifford OX10 8BB, Oxon, England.	hele@ceh.ac.uk			Natural Environment Research Council; Joint Nature Conservation Committee	The late Professor Michael Majerus was instrumental in the establishment of the Harlequin Ladybird Survey and encouraged many people around the world in their entomological research. We are extremely grateful to the thousands of people who have shared their ladybird observations over the years and contributed so richly to our ecological understanding. The UK Ladybird Survey is hosted by the Biolo…	Adachi-Hagimori T, 2011, BIOCONTROL, V56, P207, DOI 10.1007/s10526-010-9327-5; Ingels B, 2011, BIOCONTROL, V56, P871, DOI 10.1007/s10526-011-9363-9; Roy HE, 2008, ECOL ENTOMOL, V33, P175, DOI 10.1111/j.1365-2311.2007.00954.x; Wilson JRU, 2009, TRENDS ECOL EVOL, V24, P136, DOI 10.1016/j.tree.2008.10.007; Romanuk TN, 2009, PHILOS T R SOC B, V364, P1743, DOI 10.1098/rstb.2008.0286; Colautti RI, 2004…	86	0	0	38	38	WILEY-BLACKWELL	HOBOKEN	111 RIVER ST, HOBOKEN 07030-5774, NJ USA	0307-6946	1365-2311		ECOL ENTOMOL	Ecol. Entomol.	AUG	2015	40	4
J	Fogg-Rogers, L; Bay, JL; Burgess, H; Purdy, SC				Fogg-Rogers, Laura; Bay, Jacquie L.; Burgess, Hannah; Purdy, Suzanne C.			"Knowledge Is Power": A Mixed-Methods Study Exploring Adult Audience Preferences for Engagement and Learning Formats Over 3 Years of a Health Science Festival	SCIENCE COMMUNICATION			English	Article						science festival; informal science education; public engagement; lectures; health literacy	PUBLIC ENGAGEMENT; LITERACY; COMMUNICATION; NEUROSCIENCE; EDUCATION	Science festivals enable scientists to engage with publics, but format design reflecting different engagement models is contested. This study gathered mixed-methods data over 3 years (2011-2013) from on-site surveys (N = 661) of a health science festival, exploring audience preferences for dissemination or dialogue formats (lectures, discussions, community expo, lab experiments, and day out). Irr…	[Fogg-Rogers, Laura] Univ W England, Sci Commun, Bristol BS16 1QY, Avon, England; [Fogg-Rogers, Laura] Univ Auckland, Ctr Brain Res, Auckland 1, New Zealand; [Bay, Jacquie L.] Univ Auckland, Liggins Inst, Auckland 1, New Zealand; [Burgess, Hannah] Univ Auckland, Hlth Sci Honors, Auckland 1, New Zealand; [Purdy, Suzanne C.] Univ Auckland, Speech Sci, Sch Psychol, Auckland 1, New Zealand; [Bay, Jac…	Fogg-Rogers, L (reprint author), Univ W England, Sci Commun Unit, Coldharbour Lane, Bristol BS16 1QY, Avon, England.	laura.foggrogers@uwe.ac.uk			Centre for Brain Research at The University of Auckland	The author(s) disclosed receipt of the following financial support for the research, authorship, and/or publication of this article: This research was supported by the Centre for Brain Research at The University of Auckland.	Bauer MW, 2015, PUBLIC UNDERST SCI, V24, P258, DOI 10.1177/0963662515578025; Thomas DR, 2006, AM J EVAL, V27, P237, DOI 10.1177/1098214005283748; Wynne B, 2006, COMMUNITY GENET, V9, P211, DOI 10.1159/000092659; Weigold MF, 2001, SCI COMMUN, V23, P164, DOI 10.1177/1075547001023002005; Vincent BB, 2014, PUBLIC UNDERST SCI, V23, P238, DOI 10.1177/0963662513515371; Nutbeam D, 2000, HEALTH PROMOT INT,…	82	0	0	13	13	SAGE PUBLICATIONS INC	THOUSAND OAKS	2455 TELLER RD, THOUSAND OAKS, CA 91320 USA	1075-5470	1552-8545		SCI COMMUN	Sci. Commun.	AUG	2015	37	4
J	Krabbenborg, L; Mulder, HAJ				Krabbenborg, Lotte; Mulder, Henk A. J.			Upstream Public Engagement in Nanotechnology: Constraints and Opportunities	SCIENCE COMMUNICATION			English	Article						upstream public engagement; institutional practices; dialogical governance; responsible research and innovation; nanotechnology; civil society	SCIENCE-AND-TECHNOLOGY; SCIENTIFIC CITIZENSHIP; DIALOGUE; COMMUNICATION; REFLEXIVITY; GOVERNANCE; CULTURES; POLICY; POWER; RISK	Upstream public engagement with new science and technology is considered important but challenging. This article shows how engagement events are embedded in broader institutional and cultural contexts. By studying two different cases of upstream engagement in nanotechnology, we demonstrate how existing institutional responsibilities and cultural repertoires contribute much to the productivity of …	[Krabbenborg, Lotte; Mulder, Henk A. J.] Univ Groningen, Sci & Soc Grp, Groningen, Netherlands	Krabbenborg, L (reprint author), Radboud Univ Nijmegen, Inst Sci Innovat & Soc, Heyendaalseweg 135, NL-6525 AJ Nijmegen, Netherlands.	l.krabbenborg@science.ru.nl			Technology Foundation STW in the Technology Assessment section of the Nanoned program [TA7174]	The author(s) disclosed receipt of the following financial support for the research, authorship, and/or publication of this article: This research received a financial contribution from Technology Foundation STW in the Technology Assessment section of the Nanoned program (Project TA7174).	Aarts W., 2002, PARTICIPATORY TECHNO, P108; Chilvers J, 2013, SCI COMMUN, V35, P283, DOI 10.1177/1075547012454598; Maienschein J, 2008, AM J BIOETHICS, V8, P43, DOI 10.1080/15265160802109314; Davies S, 2009, PUBLIC UNDERST SCI, V18, P338, DOI 10.1177/0963662507079760; Horst M, 2010, SOC STUD SCI, V40, P105, DOI 10.1177/0306312709341500; Wynne B, 2006, COMMUNITY GENET, V9, P211, DOI 10.1159/000092…	89	0	0	9	9	SAGE PUBLICATIONS INC	THOUSAND OAKS	2455 TELLER RD, THOUSAND OAKS, CA 91320 USA	1075-5470	1552-8545		SCI COMMUN	Sci. Commun.	AUG	2015	37	4
J	Hauser, CD; Buckley, A; Porter, J				Hauser, Cindy DeForest; Buckley, Alexandra; Porter, Juliana			Passive samplers and community science in regional air quality measurement, education and communication	ENVIRONMENTAL POLLUTION			English	Article						NOx; Ozone; Passive samplers; Community science	AMBIENT NITROGEN-DIOXIDE; CITIZEN-SCIENCE; EL-PASO; SAMPLING DEVICES; OZONE POLLUTION; CITY DISTRICTS; HEALTH; VARIABILITY; EMISSIONS; EXPOSURE	Charlotte, in Mecklenburg County, North Carolina, was ranked in the top ten cities with the worst air quality for ozone in the United States by the American Lung Association from 2009 to 2011. Nearby counties that may experience similar air quality do not have state or county monitors. This study utilized NOx and ozone Ogawa passive samplers and community scientists to monitor air quality in five…	[Hauser, Cindy DeForest; Porter, Juliana] Davidson Coll, Davidson, NC 28035 USA; [Buckley, Alexandra] Johnson C Smith Univ, Charlotte, NC USA	Hauser, CD (reprint author), Davidson Coll, Dept Chem, 209 Ridge Rd, Davidson, NC 28035 USA.	cihauser@davidson.edu			Davidson Research Initiative and Davidson College Department of Chemistry; North Carolina Department of Transportation through Center for the Environment at Catawba College	The authors would like to thank the county volunteers and Center for the Environment Interns for their work throughout this project, as well as Katie Mathieson for assistance with Fig. 1. We are also grateful for the generous financial and facility support provided through the Davidson Research Initiative and Davidson College Department of Chemistry. Funding for this project was provided in part …	Ainslie B, 2007, J APPL METEOROL CLIM, V46, P1631, DOI 10.1175/JAM2547.1; Jerrett M, 2007, J TOXICOL ENV HEAL A, V70, P200, DOI 10.1080/15287390600883018; Trumbull DJ, 2000, SCI EDUC, V84, P265, DOI 10.1002/(SICI)1098-237X(200003)84:2<265::AID-SCE7>3.0.CO;2-5; Israel BA, 1998, ANNU REV PUBL HEALTH, V19, P173, DOI 10.1146/annurev.publhealth.19.1.173; Brunekreef B, 2002, LANCET, V360, P1233, DOI 10…	45	0	0	16	16	ELSEVIER SCI LTD	OXFORD	THE BOULEVARD, LANGFORD LANE, KIDLINGTON, OXFORD OX5 1GB, OXON, ENGLAND	0269-7491	1873-6424		ENVIRON POLLUT	Environ. Pollut.	AUG	2015	203
J	Hillen, F; Hofle, B				Hillen, Florian; Hoefle, Bernhard			Geo-reCAPTCHA: Crowdsourcing large amounts of geographic information from earth observation data	INTERNATIONAL JOURNAL OF APPLIED EARTH OBSERVATION AND GEOINFORMATION			English	Article						User-generated geographic information; Volunteered geographic information; Crowdsourcing; reCAPTCHA; Geo-reCAPTCHA	WEB SECURITY; LAND-COVER; CAPTCHA	The reCAPTCHA concept provides a large amount of valuable information for various applications. First, it provides security, e.g., for a form on a website, by means of a test that only a human could solve. Second, the effort of the user for this test is used to generate additional information, e.g., digitization of books or identification of house numbers. In this work, we present a concept for a…	[Hillen, Florian] Univ Osnabruck, Inst Geoinformat & Remote Sensing IGF, D-49076 Osnabruck, Germany; [Hoefle, Bernhard] Heidelberg Univ, Inst Geog, D-69120 Heidelberg, Germany	Hillen, F (reprint author), Univ Osnabruck, Inst Geoinformat & Remote Sensing IGF, Barbarastr 22b, D-49076 Osnabruck, Germany.	fhillen@igf.uos.de	Hofle, Bernhard/A-4702-2010				Roick O, 2013, T GIS, V17, P763, DOI 10.1111/tgis.12032; Rutzinger M, 2009, IEEE J-STARS, V2, P11, DOI 10.1109/JSTARS.2009.2012488; Fritz S, 2012, ENVIRON MODELL SOFTW, V31, P110, DOI 10.1016/j.envsoft.2011.11.015; von Ahn L, 2008, SCIENCE, V321, P1465, DOI 10.1126/science.1160379; Comber A, 2013, INT J APPL EARTH OBS, V23, P37, DOI 10.1016/j.jag.2012.11.002; Haklay M, 2010, CARTOGR J, V47, P315,…	42	0	0	13	13	ELSEVIER SCIENCE BV	AMSTERDAM	PO BOX 211, 1000 AE AMSTERDAM, NETHERLANDS	0303-2434			INT J APPL EARTH OBS	Int. J. Appl. Earth Obs. Geoinf.	AUG	2015	40
J	Rallapalli, G; Players, F; Saunders, DG; Yoshida, K; Edwards, A; Lugo, CA; Collin, S; Clavijo, B; Corpas, M; Swarbreck, D; Clark, M; Downie, JA; Kamoun, S; Cooper, T; MacLean, D				Rallapalli, Ghanasyam; Players, Fraxinus; Saunders, Diane Go; Yoshida, Kentaro; Edwards, Anne; Lugo, Carlos A.; Collin, Steve; Clavijo, Bernardo; Corpas, Manuel; Swarbreck, David; Clark, Matthew; Downie, J. Allan; Kamoun, Sophien; Cooper, Team; MacLean, Dan			Lessons from Fraxinus, a crowd-sourced citizen science game in genomics	ELIFE			English	Article								In 2013, in response to an epidemic of ash dieback disease in England the previous year, we launched a Facebook-based game called Fraxinus to enable non-scientists to contribute to genomics studies of the pathogen that causes the disease and the ash trees that are devastated by it. Over a period of 51 weeks players were able to match computational alignments of genetic sequences in 78% of cases, …	[Rallapalli, Ghanasyam; Saunders, Diane Go; Yoshida, Kentaro; Lugo, Carlos A.; Kamoun, Sophien; MacLean, Dan] Sainsbury Lab, Norwich, Norfolk, England; [Players, Fraxinus] Facebook, Fraxinus Ash Dieback Game Commun, London, England; [Saunders, Diane Go; Edwards, Anne; Downie, J. Allan] John Innes Ctr, Norwich, Norfolk, England; [Saunders, Diane Go; Clavijo, Bernardo; Corpas, Manuel; Swarbreck, Da…	MacLean, D (reprint author), Kobe Univ, Lab Plant Genet, Kobe, Hyogo 657, Japan.	dan.maclean@tsl.ac.uk	Kamoun, Sophien/B-3529-2009	Kamoun, Sophien/0000-0002-0290-0315	Biotechnology and Biological Sciences Research Council (BBSRC); Department for Environment, Food and Rural Affairs (Defra); Gatsby Charitable Foundation; John Innes Foundation; Genome Analysis Centre	Biotechnology and Biological Sciences Research Council (BBSRC) Nornex Dan MacLean; Department for Environment, Food and Rural Affairs (Defra) Nornex Diane GO Saunders; Gatsby Charitable Foundation None Dan MacLean; John Innes Foundation None Dan MacLean; The Genome Analysis Centre National Capability Grant Dan MacLean; John Innes Foundation Emeritus Fellowship J Allan Downie	Ranard BL, 2014, J GEN INTERN MED, V29, P187, DOI 10.1007/s11606-013-2536-8; Lintott CJ, 2008, MON NOT R ASTRON SOC, V389, P1179, DOI 10.1111/j.1365-2966.2008.13689.x; Li H, 2009, BIOINFORMATICS, V25, P1754, DOI 10.1093/bioinformatics/btp324; Li H, 2009, BIOINFORMATICS, V25, P2078, DOI 10.1093/bioinformatics/btp352; Zhao LJ, 2013, PHYSICA A, V392, P995, DOI 10.1016/j.physa.2012.09.030; Khatib F, …	15	0	0	7	7	ELIFE SCIENCES PUBLICATIONS LTD	CAMBRIDGE	SHERATON HOUSE, CASTLE PARK, CAMBRIDGE, CB3 0AX, ENGLAND	2050-084X			ELIFE	eLife	2015-07-29	2015	4
J	Peron, G; Altwegg, R				Peron, Guillaume; Altwegg, Res			Departures from the Energy-Biodiversity Relationship in South African Passerines: Are the Legacies of Past Climates Mediated by Behavioral Constraints on Dispersal?	PLOS ONE			English	Article							COMMUNITY ECOLOGY; GEOGRAPHICAL PATTERNS; SPECIES DISTRIBUTION; DIVERSITY PATTERNS; POTENTIAL IMPACTS; OCCUPANCY MODELS; CITIZEN SCIENCE; TECTONIC UPLIFT; BIRDS; EVOLUTION	Legacies of paleoclimates in contemporary biodiversity patterns have mostly been investigated with global datasets, or with weakly dispersive organisms, and as a consequence been interpreted in terms of geographical or physical constraints. If paleoclimatic legacies also occurred at the regional scale in the distributions of vagile organisms within biomes, they would rather suggest behavioral con…	[Peron, Guillaume; Altwegg, Res] Univ Cape Town, Dept Stat Sci, Stat Ecol Environm & Conservat, ZA-7701 Cape Town, South Africa; [Altwegg, Res] Univ Cape Town, African Climate & Dev Initiat, ZA-7701 Rondebosch, South Africa	Altwegg, R (reprint author), Univ Cape Town, Dept Stat Sci, Stat Ecol Environm & Conservat, ZA-7701 Cape Town, South Africa.	res.altwegg@gmail.com			National Research Foundation of South Africa [85802]; South African National Biodiversity Institute; U.S. Fish and Wildlife Service; Commonwealth of the Northern Mariana Islands Division of Fish Wildlife; French National Parks (PNF)	This study was supported by a grant from the National Research Foundation of South Africa (Grant 85802) and by the South African National Biodiversity Institute. GP also received support from the U.S. Fish and Wildlife Service, the Commonwealth of the Northern Mariana Islands Division of Fish & Wildlife, and French National Parks (PNF). These funders had no role in study design, data collection a…	Chase BM, 2007, EARTH-SCI REV, V84, P103, DOI 10.1016/j.earscirev.2007.06.002; Beale CM, 2008, P NATL ACAD SCI USA, V105, P14908, DOI 10.1073/pnas.0803506105; Royle JA, 2003, ECOLOGY, V84, P777, DOI 10.1890/0012-9658(2003)084[0777:EAFRPA]2.0.CO;2; Evans KL, 2006, GLOBAL ECOL BIOGEOGR, V15, P372, DOI 10.1111/j.1466-822x.2006.00228.x; Wiens JJ, 2011, ECOL LETT, V14, P643, DOI 10.1111/j.1461-0248.20…	80	0	0	12	12	PUBLIC LIBRARY SCIENCE	SAN FRANCISCO	1160 BATTERY STREET, STE 100, SAN FRANCISCO, CA 94111 USA	1932-6203			PLOS ONE	PLoS One	2015-07-24	2015	10	7
J	Woods, AT; Velasco, C; Levitan, CA; Wan, XA; Spence, C				Woods, Andy T.; Velasco, Carlos; Levitan, Carmel A.; Wan, Xiaoang; Spence, Charles			Conducting perception research over the internet: a tutorial review	PEERJ			English	Article						Perception; Citizen science; Prolific academic; Mechanical Turk; Internet-based testing; Haxe	AMAZON MECHANICAL TURK; CROSSMODAL CORRESPONDENCES; PSYCHOLOGICAL-RESEARCH; SOCIAL-SCIENCES; SPECIAL SECTION; RESPONSE-TIMES; ONLINE; SHAPE; REPLICABILITY; REPLICATION	This article provides an overview of the recent literature on the use of internet-based testing to address important questions in perception research. Our goal is to provide a starting point for the perception researcher who is keen on assessing this tool for their own research goals. Internet-based testing has several advantages over in-lab research, including the ability to reach a relatively b…	[Woods, Andy T.; Velasco, Carlos; Spence, Charles] Univ Oxford, Dept Expt Psychol, Crossmodal Res Lab, Oxford OX1 2JD, England; [Woods, Andy T.] Xperiment, Surrey, England; [Levitan, Carmel A.] Occidental Coll, Dept Cognit Sci, Los Angeles, CA 90041 USA; [Wan, Xiaoang] Tsinghua Univ, Beijing 100084, Peoples R China	Woods, AT (reprint author), Univ Oxford, Dept Expt Psychol, Crossmodal Res Lab, Oxford OX1 2JD, England.	andytwoods@gmail.com			AHRC [AH/L007053/1]	CS received funding from the AHRC for the Rethinking the Senses project (AH/L007053/1). The funders had no role in study design, data collection and analysis, decision to publish, or preparation of the manuscript.	Admin, 2013, REASONS WHY AMAZON M; Aiello LM, 2012, ACM T WEB, V6, P1, DOI 10.1145/2180861.2180866; Duchaine B, 2006, NEUROPSYCHOLOGIA, V44, P576, DOI 10.1016/j.neuropsychologia.2005.07.001; Eriksson K, 2010, JUDGM DECIS MAK, V5, P159; Chandler J, 2014, BEHAV RES METHODS, V46, P112, DOI 10.3758/s13428-013-0365-7; Forster KI, 2003, BEHAV RES METH INS C, V35, P116, DOI 10.3758/BF03195503; Downs JS,…	113	1	1	10	10	PEERJ INC	LONDON	341-345 OLD ST, THIRD FLR, LONDON, EC1V 9LL, ENGLAND	2167-8359			PEERJ	PeerJ	2015-07-23	2015	3
J	Branchini, S; Meschini, M; Covi, C; Piccinetti, C; Zaccanti, F; Goffredo, S				Branchini, Simone; Meschini, Marta; Covi, Claudia; Piccinetti, Corrado; Zaccanti, Francesco; Goffredo, Stefano			Participating in a Citizen Science Monitoring Program: Implications for Environmental Education	PLOS ONE			English	Article							EGYPTIAN RED-SEA; CORAL-REEFS; COASTAL TOURISM; DIVING IMPACTS; SCUBA-DIVERS; MANAGEMENT; BRIEFINGS; DAMAGE; FORCE; AREAS	Tourism is of growing economical importance to many nations, in particular for developing countries. Although tourism is an important economic vehicle for the host country, its continued growth has led to on-going concerns about its environmental sustainability. Coastal and marine tourism can directly affect the environment through direct and indirect tourist activities. For these reasons tourism…	[Branchini, Simone; Meschini, Marta; Covi, Claudia; Zaccanti, Francesco; Goffredo, Stefano] Univ Bologna, Biol Sect, Dept Biol Geol & Environm Sci, Marine Sci Grp,Citizen Sci Lab, I-40126 Bologna, Italy; [Piccinetti, Corrado] Univ Bologna, Lab Fisheries & Marine Biol Fano, I-61032 Fano, PU, Italy	Goffredo, S (reprint author), Univ Bologna, Biol Sect, Dept Biol Geol & Environm Sci, Marine Sci Grp,Citizen Sci Lab, Via F Selmi 3, I-40126 Bologna, Italy.	s.goffredo@unibo.it			Italian Government (Ministry of the Education, University and Research); Egyptian Government (Ministry of Tourism of the Arab Republic of Egypt, Egyptian Tourist Authority); tour operator Settemari; diving agency SNSI, Scuba Nitrox Safety International; diving centers Viaggio nel Blu; Project Aware Foundation	"STE: Scuba Tourism for the Environment" was funded by the Italian Government (Ministry of the Education, University and Research; www.istruzione.it), the Egyptian Government (Ministry of Tourism of the Arab Republic of Egypt, Egyptian Tourist Authority; www.egypt.travel), the tour operator Settemari (www.settemari.it), the diving agency SNSI, Scuba Nitrox Safety International (www.scubasnsi.com)…	Ammar Mohammed S.A., 2006, Egyptian Journal of Aquatic Research, V32, P184; Hall CM, 2001, OCEAN COAST MANAGE, V44, P601, DOI 10.1016/S0964-5691(01)00071-0; Hawkins JP, 1999, CONSERV BIOL, V13, P888, DOI 10.1046/j.1523-1739.1999.97447.x; Lynn NA, 2003, LANDSCAPE URBAN PLAN, V64, P77, DOI 10.1016/S0169-2046(02)00202-5; Lansing P, 2007, J BUS ETHICS, V72, P77, DOI 10.1007/s10551-006-9157-7; Medio D…	41	0	0	30	30	PUBLIC LIBRARY SCIENCE	SAN FRANCISCO	1160 BATTERY STREET, STE 100, SAN FRANCISCO, CA 94111 USA	1932-6203			PLOS ONE	PLoS One	2015-07-22	2015	10	7
J	Constant, J				Constant, Jerome			Review of the effusus group of the Lanternfly genus Pyrops Spinola, 1839, with one new species and notes on trophobiosis (Hemiptera: Fulgoromorpha: Fulgoridae)	EUROPEAN JOURNAL OF TAXONOMY			English	Review						Indonesia; Malaysia; Lanternfly; Fulgoroidea; citizen science		The species group effusus of the genus Pyrops Spinola, 1839 is reviewed and the nomenclatural history of the genus Pyrops is briefly summarized. One new species from eastern Borneo, Pyrops synavei sp. nov., is described. P. gunjii (Sato & Nagai, 1994) stat. nov. is proposed as a valid species instead of a subspecies of P. whiteheadi (Distant, 1889). P. maquilinganus (Baker, 1925) is removed from …	Royal Belgian Inst Nat Sci, OD Phylogeny & Taxon, Entomol, B-1000 Brussels, Belgium	Constant, J (reprint author), Royal Belgian Inst Nat Sci, OD Phylogeny & Taxon, Entomol, Vautier St 29, B-1000 Brussels, Belgium.	jerome.constant@naturalsciences.be			European Union (Synthesys Project) [GB-TAF-1642]	I warmly thank Mrss Kara Norby and Ashley Kennedy, Messrs Joost Woltering, Dave Forney, Martin Hauskrecht, Nicola Messina, Ch'ien C. Lee (www.wildborneo.com.my) and Anton Sorokin for sharing their photographs, observations and/or data, as well as all the persons who published their photographs and data on the internet (listed under "material examined on photographs"); Mr Jonathan Brecko for takin…	Baker C. F., 1925, Philippine Journal of Science, V28, P343; Blanchard E., 1845, HIST INSECTES TRAITA, V2, P424; Bourgoin T., 2015, FLOW FULGOROMORPHA L; Bourgoin Thierry, 1997, Memoires du Museum National d'Histoire Naturelle, V173, P109; Constant Jerome, 2004, Bulletin de l'Institut Royal des Sciences Naturelles de Belgique Entomologie, V74, P11; Constant J., 2015, BELGIAN J ENTOMOLOGY, V27, P1…	26	0	0	2	2	MUSEUM NATL HISTOIRE NATURELLE	PARIS	SERVICE PUBLICATIONS SCIENTIFIQUES, 57 RUE CUVIER, 75005 PARIS, FRANCE	2118-9773			EUR J TAXON	Eur. J. Taxon.	2015-07-08	2015	128
J	Brewin, RJW; de Mora, L; Jackson, T; Brewin, TG; Shutler, J				Brewin, Robert J. W.; de Mora, Lee; Jackson, Thomas; Brewin, Thomas G.; Shutler, Jamie			On the Potential of Surfers to Monitor Environmental Indicators in the Coastal Zone	PLOS ONE			English	Article							CITIZEN-SCIENCE PROJECT; OCEAN ACIDIFICATION; ECOSYSTEM SERVICES; ENGLISH-CHANNEL; CLIMATE-CHANGE; TEMPERATURE; SEA; MARINE; WATERS; BLOOMS	The social and economic benefits of the coastal zone make it one of the most treasured environments on our planet. Yet it is vulnerable to increasing anthropogenic pressure and climate change. Coastal management aims to mitigate these pressures while augmenting the socio-economic benefits the coastal region has to offer. However, coastal management is challenged by inadequate sampling of key envi…	[Brewin, Robert J. W.; de Mora, Lee; Jackson, Thomas] Plymouth Marine Lab, Plymouth, Devon, England; [Brewin, Robert J. W.] Plymouth Marine Lab, Natl Ctr Earth Observat, Plymouth, Devon, England; [Brewin, Thomas G.] Chatham & Clarendon Grammar Sch, Ramsgate, Kent, England; [Shutler, Jamie] Univ Exeter, Coll Life & Environm Sci, Penryn, Cornwall, England	Brewin, RJW (reprint author), Plymouth Marine Lab, Plymouth, Devon, England.	robr@pml.ac.uk			Plymouth Marine Laboratory; UK National Centre for Earth Observation; Changing Earth Science Network initiative of the STSE program of the European Space Agency	The work was supported by a Research Project (RP) funded by Plymouth Marine Laboratory. The lead author is also supported by the UK National Centre for Earth Observation, and by the Changing Earth Science Network initiative of the STSE program of the European Space Agency. The funders had no role in study design, data collection and analysis, decision to publish, or preparation of the manuscript.	Lotze HK, 2006, SCIENCE, V312, P1806, DOI 10.1126/science.1128035; Trumbull DJ, 2000, SCI EDUC, V84, P265, DOI 10.1002/(SICI)1098-237X(200003)84:2<265::AID-SCE7>3.0.CO;2-5; GOREAU TJ, 1994, AMBIO, V23, P176; Costanza R, 1997, NATURE, V387, P253, DOI 10.1038/387253a0; McGranahan G, 2007, ENVIRON URBAN, V19, P17, DOI 10.1177/0956247807076960; Gill AB, 2005, J APPL ECOL, V42, P605, DOI 10.1111/j.136…	78	0	0	26	26	PUBLIC LIBRARY SCIENCE	SAN FRANCISCO	1160 BATTERY STREET, STE 100, SAN FRANCISCO, CA 94111 USA	1932-6203			PLOS ONE	PLoS One	2015-07-08	2015	10	7
J	Treffry-Goatley, A; Mahlinza, M; Imrie, J				Treffry-Goatley, Astrid; Mahlinza, Mduduzi; Imrie, John			Public engagement with HIV in a rural South African context: an analysis of a small-media, taxi-based edutainment model applied in Jiving with Science (vol 27, pg 112, 2013)	CRITICAL ARTS-SOUTH-NORTH CULTURAL AND MEDIA STUDIES			English	Correction														Wellcome Trust [WT097410]	The above article was made open access thanks to a grant from the Wellcome Trust (Grant number WT097410).	Treffry-Goatley A, 2013, CRIT ARTS, V27, P112, DOI 10.1080/02560046.2013.766976	1	0	0	0	0	ROUTLEDGE JOURNALS, TAYLOR & FRANCIS LTD	ABINGDON	4 PARK SQUARE, MILTON PARK, ABINGDON OX14 4RN, OXFORDSHIRE, ENGLAND	0256-0046	1992-6049		CRIT ARTS	Crit. Arts	2015-07-04	2015	29	4
J	Nattrass, N; Conradie, B				Nattrass, Nicoli; Conradie, Beatrice			Jackal Narratives: Predator Control and Contested Ecologies in the Karoo, South Africa	JOURNAL OF SOUTHERN AFRICAN STUDIES			English	Article							BLACK-BACKED JACKALS; CANIS-MESOMELAS; DEPREDATION; COYOTES; TERRITORIALITY	This article considers the historical roots of, and scientific evidence for, rival jackal narratives' about the ecology and control of the black-backed jackal (Canis mesomelas) in the Karoo, South Africa. During the mid 20th century, state-supported co-operative hunting and jackal-proof fences largely contained jackal predation. But as South Africa moved towards democracy in the 1990s, in a conte…	[Nattrass, Nicoli] Univ Cape Town, Ctr Social Sci Res, ZA-7701 Rondebosch, South Africa; [Conradie, Beatrice] Univ Cape Town, Ctr Social Sci Res, Sch Econ, ZA-7701 Rondebosch, South Africa	Nattrass, N (reprint author), Univ Cape Town, Ctr Social Sci Res, ZA-7701 Rondebosch, South Africa.	nicoli.nattrass@uct.ac.za; beatrice.conradie@uct.ac.za					Andelt W. F., 1985, WILDLIFE MONOGR, V94, P3; Jenner N, 2011, J ZOOL, V284, P231, DOI 10.1111/j.1469-7998.2011.00811.x; Conner MM, 1998, J WILDLIFE MANAGE, V62, P690, DOI 10.2307/3802345; [Anonymous], 2011, FARMERS WEEKLY 0923; Hurley MA, 2011, WILDLIFE MONOGR, P1, DOI 10.1002/wmon.4; Bingham J, 2002, AFR ZOOL, V37, P21; Kamler JF, 2013, J MAMMAL, V94, P295, DOI 10.1644/12-MAMM-A-122.1; Knowlton …	46	0	0	4	4	ROUTLEDGE JOURNALS, TAYLOR & FRANCIS LTD	ABINGDON	4 PARK SQUARE, MILTON PARK, ABINGDON OX14 4RN, OXFORDSHIRE, ENGLAND	0305-7070	1465-3893		J S AFR STUD	J. South. Afr. Stud.	2015-07-04	2015	41	4
J	Zhang, CR; Zhao, T; Li, WD				Zhang, Chuanrong; Zhao, Tian; Li, Weidong			Towards an interoperable online volunteered geographic information system for disaster response	JOURNAL OF SPATIAL SCIENCE			English	Review						volunteered geographic information (VGI); geospatial semantic web; disaster response	GEOSPATIAL SEMANTIC WEB; GIS; INTEGRATION; INTERNET; SUPPORT; CRISIS	Although volunteered geographic information (VGI) (voluntarily provided crowd-sourcing spatial data) applications have proven to be useful for gathering information about a crisis, these applications have provided only limited utilities for response coordination. One major problem of existing implemented VGI systems is heterogeneous data semantics. To provide more utilities to disaster response, …	[Zhang, Chuanrong; Li, Weidong] Univ Connecticut, Dept Geog, Storrs, CT 06269 USA; [Zhang, Chuanrong; Li, Weidong] Univ Connecticut, Ctr Environm Sci & Engn, Storrs, CT USA; [Zhao, Tian] Univ Wisconsin, Dept Comp Sci, Milwaukee, WI 53201 USA	Zhang, CR (reprint author), Univ Connecticut, Dept Geog, Storrs, CT 06269 USA.	chuanrong.zhang@uconn.edu					Zhang CR, 2010, INT J APPL EARTH OBS, V12, P409, DOI 10.1016/j.jag.2010.05.004; Zielstra D, 2013, T GIS, V17, P315, DOI 10.1111/tgis.12037; Zhang C, 2007, J SPAT SCI, V52, P35, DOI 10.1080/14498596.2007.9635121; Palen L, 2009, SOC SCI COMPUT REV, V27, P467, DOI 10.1177/0894439309332302; De Longueville B, 2010, INT J DIGIT EARTH, V3, P242, DOI 10.1080/17538947.2010.484869; Elwood S, 2012, ANN ASSO…	47	0	0	0	0	TAYLOR & FRANCIS LTD	ABINGDON	4 PARK SQUARE, MILTON PARK, ABINGDON OX14 4RN, OXON, ENGLAND	1449-8596	1836-5655		J SPAT SCI	J. Spat. Sci.	2015-07-03	2015	60	2
J	Peters, MA; Eames, C; Hamilton, D				Peters, M. A.; Eames, C.; Hamilton, D.			The use and value of citizen science data in New Zealand	JOURNAL OF THE ROYAL SOCIETY OF NEW ZEALAND			English	Article						citizen science typologies; community environmental groups; community-based environmental monitoring; data validity; environmental restoration; New Zealand; volunteer monitoring	PUBLIC-PARTICIPATION; VOLUNTEER; COMMUNITIES	There has been significant growth worldwide of citizen science projects involving community members collecting environmental data. The following study is based on questionnaire responses from 296 community environmental groups and interviews with 34 project partners (e.g. resource managers and scientists) and examines the use and value of citizen science data in New Zealand. Frequency counts and …	[Peters, M. A.; Hamilton, D.] Univ Waikato, Sch Sci, Hamilton, New Zealand; [Eames, C.] Univ Waikato, Technol Environm Math & Sci Educ Res Ctr, Hamilton, New Zealand	Peters, MA (reprint author), Univ Waikato, Sch Sci, Hamilton, New Zealand.	map32@students.waikato.ac.nz			Ministry of Business, Innovation and Employment [UOWX0505]	This study was funded by the Ministry of Business, Innovation and Employment (UOWX0505: Restoring freshwater ecosystems and resurrecting indigenous lake biodiversity). Approval was granted by the Faculty of Science and Engineering Human Research Ethics Subcommittee (University of Waikato).	Gillett DJ, 2012, ENVIRON MONIT ASSESS, V184, P3239, DOI 10.1007/s10661-011-2185-5; Spurr EB, 2012, NEW ZEAL J ECOL, V36, P287; Savan B, 2003, ENVIRON MANAGE, V31, P561, DOI 10.1007/s00267-002-2897-y; Pandya RE, 2012, FRONT ECOL ENVIRON, V10, P314, DOI 10.1890/120007; Marshall MN, 1996, FAM PRACT, V13, P92, DOI 10.1093/fampra/13.1.92; Clayton R, 2010, WILDLIFE RES, V37, P360, DOI 10.1071/WR09072;…	37	0	0	0	0	TAYLOR & FRANCIS LTD	ABINGDON	4 PARK SQUARE, MILTON PARK, ABINGDON OX14 4RN, OXON, ENGLAND	0303-6758	1175-8899		J ROY SOC NEW ZEAL	J. R. Soc. N.Z.	2015-07-03	2015	45	3
J	Moffett, ER; Neale, MW				Moffett, E. R.; Neale, M. W.			Volunteer and professional macroinvertebrate monitoring provide concordant assessments of stream health	NEW ZEALAND JOURNAL OF MARINE AND FRESHWATER RESEARCH			English	Article						macroinvertebrates; MCI; monitoring; New Zealand; streams; temporal trends; volunteer; Wai Care; WIMP	CITIZEN SCIENCE; ECOLOGICAL RESEARCH; QUALITY; COMMUNITIES; TOOL; SCIENTISTS; BENEFITS; STATE; BIAS	Whilst volunteer monitoring has many benefits for both volunteers and professionals, volunteer data must be validated to understand the value and potential applications of information from volunteer monitoring programmes. Our study aimed to assess the concordance between volunteer and professional data, including state and trend assessments. We compared macroinvertebrate data collected by volunte…	[Moffett, E. R.; Neale, M. W.] Auckland Council, Res Invest & Monitoring Unit, Auckland, New Zealand; [Neale, M. W.] Univ Auckland, Sch Biol Sci, Auckland 1, New Zealand	Neale, MW (reprint author), Golder Associates NZ Ltd, Auckland, New Zealand.	mneale@golder.co.nz					Donnelly A, 2014, INT J BIOMETEOROL, V58, P1237, DOI 10.1007/s00484-013-0717-0; Reynolds JA, 2013, FRONT ECOL ENVIRON, V11, P565, DOI 10.1890/1540-9295-11.10.565; Collier KJ, 2008, FRESHWATER BIOL, V53, P603, DOI 10.1111/j.1365-2427.2007.01923.x; Bonney R, 2009, BIOSCIENCE, V59, P977, DOI 10.1525/bio.2009.59.11.9; Foster-Smith J, 2003, BIOL CONSERV, V113, P199, DOI 10.1016/S0006-3207(02)00373-7; …	39	0	0	6	6	TAYLOR & FRANCIS LTD	ABINGDON	4 PARK SQUARE, MILTON PARK, ABINGDON OX14 4RN, OXON, ENGLAND	0028-8330	1175-8805		NEW ZEAL J MAR FRESH	N. Z. J. Mar. Freshw. Res.	2015-07-03	2015	49	3
J	Lewis, EB				Lewis, Elizabeth B.			Geoscience research and outreach: schools and public engagement (Innovations in Science Education and Technology, vol 21)	STUDIES IN SCIENCE EDUCATION			English	Book Review									[Lewis, Elizabeth B.] Univ Nebraska, Coll Educ & Human Sci, Lincoln, NE 68588 USA	Lewis, EB (reprint author), Univ Nebraska, Coll Educ & Human Sci, Lincoln, NE 68588 USA.	elewis3@unl.edu					Abell S, 2007, HDB RES SCI ED; Lewis EB, 2010, J RES SCI TEACH, V47, P121, DOI 10.1002/tea.20320; Riggs EM, 2001, GEOTIMES, V46, P14; Bell B, 2001, SCI EDUC, V85, P536, DOI 10.1002/sce.1022; CHINN CA, 1993, REV EDUC RES, V63, P1; Barstow D., 2002, BLUEPRINT CHANGE REP; Natl Res Council, 2009, LEARNING SCIENCE IN INFORMAL ENVIRONMENTS: PEOPLE, PLACES, AND PURSUITS, P1; Blank R. K., 2008, DOES TEAC…	21	0	0	1	1	ROUTLEDGE JOURNALS, TAYLOR & FRANCIS LTD	ABINGDON	4 PARK SQUARE, MILTON PARK, ABINGDON OX14 4RN, OXFORDSHIRE, ENGLAND	0305-7267	1940-8412		STUD SCI EDUC	Stud. Sci. Educ.	2015-07-03	2015	51	2
J	Poorazizi, ME; Steiniger, S; Hunter, AJS				Poorazizi, M. Ebrahim; Steiniger, Stefan; Hunter, Andrew J. S.			A service-oriented architecture to enable participatory planning: an e-planning platform	INTERNATIONAL JOURNAL OF GEOGRAPHICAL INFORMATION SCIENCE			English	Article						e-participation; PPGIS; urban planning; SOA; SDI; Web 2.0	GEOGRAPHIC INFORMATION-SYSTEMS; PUBLIC-PARTICIPATION; DIGITAL DIVIDE; WEB 2.0; INTERNET USERS; DELIBERATION; GIS; TECHNOLOGY; GOVERNMENT; KNOWLEDGE	Recent advances in Web technologies have opened avenues to create socio-technical platforms that can empower citizens in urban planning processes. The rise of the GeoWeb and the popularity of Web 2.0 collaborative tools can facilitate the development of a new generation of bottom-up Public Participatory GIS (PPGIS) platforms that can incorporate user-generated content into Spatial Data Infrastruc…	[Poorazizi, M. Ebrahim; Steiniger, Stefan; Hunter, Andrew J. S.] Univ Calgary, Dept Geomat Engn, Calgary, AB, Canada; [Steiniger, Stefan] Pontificia Univ Catolica Chile, Dept Ingn Transporte & Logist, Santiago, Chile	Poorazizi, ME (reprint author), Univ Calgary, Dept Geomat Engn, Calgary, AB, Canada.	mepooraz@ucalgary.ca			Canadian NEPTIS Foundation; GEOIDE [TSII 202]	This work was supported by the Canadian NEPTIS Foundation and GEOIDE (Grant TSII 202).	Alameh N, 2003, IEEE INTERNET COMPUT, V7, P22, DOI 10.1109/MIC.2003.1232514; Amirian P, 2010, COMPUT ENVIRON URBAN, V34, P309, DOI 10.1016/j.compenvurbsys.2010.02.002; Vescoukis V, 2012, FUTURE GENER COMP SY, V28, P593, DOI 10.1016/j.future.2011.03.010; Law J, 2004, ECON SOC, V33, P390, DOI 10.1080/0308514042000225716; Collins HM, 2001, SOC STUD SCI, V31, P71, DOI 10.1177/030631201031001004; Kazm…	110	0	0	27	27	TAYLOR & FRANCIS LTD	ABINGDON	4 PARK SQUARE, MILTON PARK, ABINGDON OX14 4RN, OXON, ENGLAND	1365-8816	1362-3087		INT J GEOGR INF SCI	Int. J. Geogr. Inf. Sci.	2015-07-03	2015	29	7
J	Fonte, CC; Bastin, L; See, L; Foody, G; Lupia, F				Fonte, Cidalia C.; Bastin, Lucy; See, Linda; Foody, Giles; Lupia, Flavio			Usability of VGI for validation of land cover maps	INTERNATIONAL JOURNAL OF GEOGRAPHICAL INFORMATION SCIENCE			English	Review						VGI; land cover; land use; quality; validation; crowdsourcing	VOLUNTEERED GEOGRAPHIC INFORMATION; GROUND REFERENCE DATA; ACCURACY ASSESSMENT; DATA SET; CLASSIFICATION; AREA; CHALLENGES; FRAMEWORK; AMERICA; QUALITY	Volunteered Geographic Information (VGI) represents a growing source of potentially valuable data for many applications, including land cover map validation. It is still an emerging field and many different approaches can be used to take value from VGI, but also many pros and cons are related to its use. Therefore, since it is timely to get an overview of the subject, the aim of this article is t…	[Fonte, Cidalia C.] Univ Coimbra, Dept Math, Coimbra, Portugal; [Fonte, Cidalia C.] INESC Coimbra, Inst Syst Engn & Comp Coimbra, Coimbra, Portugal; [Bastin, Lucy] Aston Univ, Sch Engn & Appl Sci, Birmingham B4 7ET, W Midlands, England; [See, Linda] Int Inst Appl Syst Anal, Ecosyst Serv & Management Program, A-2361 Laxenburg, Austria; [Foody, Giles] Univ Nottingham, Sch Geog, Nottingham NG7 2RD, …	Fonte, CC (reprint author), Univ Coimbra, Dept Math, Coimbra, Portugal.	cfonte@mat.uc.pt	Fonte, Cidalia/A-9811-2014	Fonte, Cidalia/0000-0001-9408-8100	EU COST Action TD1202 "Mapping and the Citizen Sensor'	The production of this review benefited from support from EU COST Action TD1202 "Mapping and the Citizen Sensor', which is greatly appreciated.	Heipke C, 2010, ISPRS J PHOTOGRAMM, V65, P550, DOI 10.1016/j.isprsjprs.2010.06.005; Stehman SV, 2009, INT J REMOTE SENS, V30, P5243, DOI 10.1080/01431160903131000; Aide TM, 2013, BIOTROPICA, V45, P262, DOI 10.1111/j.1744-7429.2012.00908.x; Herold M, 2008, REMOTE SENS ENVIRON, V112, P2538, DOI 10.1016/j.rse.2007.11.013; Friedl MA, 2010, REMOTE SENS ENVIRON, V114, P168, DOI 10.1016/j.rse.2009.08.01…	72	0	0	16	16	TAYLOR & FRANCIS LTD	ABINGDON	4 PARK SQUARE, MILTON PARK, ABINGDON OX14 4RN, OXON, ENGLAND	1365-8816	1362-3087		INT J GEOGR INF SCI	Int. J. Geogr. Inf. Sci.	2015-07-03	2015	29	7
J	Hanks, D; Andrew, R; Anderson, A				Hanks, Daniel; Andrew, Ross; Anderson, Alison			West Virginia University AFS Student Subunit Leads a Citizen Science Program	FISHERIES			English	Article									[Hanks, Daniel] W Virginia Univ, Div Forestry & Nat Resources, Morgantown, WV 26506 USA; [Andrew, Ross; Anderson, Alison] W Virginia Univ, Div Wildlife & Fisheries, Morgantown, WV 26506 USA	Hanks, D (reprint author), W Virginia Univ, Div Forestry & Nat Resources, 223 Percival Hall, Morgantown, WV 26506 USA.	rhanks@mix.wvu.edu						0	0	0	7	7	TAYLOR & FRANCIS INC	PHILADELPHIA	530 WALNUT STREET, STE 850, PHILADELPHIA, PA 19106 USA	0363-2415	1548-8446		FISHERIES	Fisheries	2015-07-03	2015	40	7
J	Williams, JE; Neville, HM; Haak, AL; Colyer, WT; Wenger, SJ; Bradshaw, S				Williams, Jack E.; Neville, Helen M.; Haak, Amy L.; Colyer, Warren T.; Wenger, Seth J.; Bradshaw, Stan			Climate Change Adaptation and Restoration of Western Trout Streams: Opportunities and Strategies	FISHERIES			English	Article							COLUMBIA RIVER-BASIN; BULL TROUT; MANAGEMENT; POPULATIONS; FUTURE; RISK; DISTRIBUTIONS; CONSERVATION; TEMPERATURE; VARIABILITY	Climate change is contributing to the severity and rate of stream degradation by changing the timing of peak flows, altering flow regimes, creating more frequent and intense disturbances, and increasing stream temperatures. Herein we describe three case studies of trout stream adaptation that address existing and climate-driven causes of degradation through habitat restoration. The case studies v…	[Williams, Jack E.] Trout Unltd, Medford, OR 97501 USA; [Neville, Helen M.; Haak, Amy L.] Trout Unltd, Boise, ID USA; [Colyer, Warren T.] Trout Unltd, Missoula, MT USA; [Wenger, Seth J.] Univ Georgia, Athens, GA 30602 USA; [Bradshaw, Stan] Trout Unltd, Helena, MT USA	Williams, JE (reprint author), Trout Unltd, 4393 Pioneer Rd, Medford, OR 97501 USA.	jwilliams@tu.org			National Fish and Wildlife Foundation; BLM; Trout Unlimited (TU); Western Native Trout Initiative; Ruby Pipeline Endangered Species Conservation Fund; Barrick Goldstrike Mines Inc.; Nevada Mining Association; Maggie Creek; Twenty-Five Ranches; U.S. Forest Service; National Forest Foundation; Idaho Department of Environmental Quality; TU; Simplot Corporation; TU's Coldwater Conservation Fund	Funding was provided by the National Fish and Wildlife Foundation, BLM, Trout Unlimited (TU), the Western Native Trout Initiative, the Ruby Pipeline Endangered Species Conservation Fund, Barrick Goldstrike Mines Inc., and Nevada Mining Association, with support from the Maggie Creek and Twenty-Five Ranches. Funding for Crow Creek restoration was provided by the U.S. Forest Service, National Fores…	Kaushal SS, 2010, FRONT ECOL ENVIRON, V8, P461, DOI 10.1890/090037; Graybeal DY, 2006, J APPL METEOROL CLIM, V45, P178, DOI 10.1175/JAM2330.1; Brown DK, 2001, WEST N AM NATURALIST, V61, P139; Rieman B, 1997, FISHERIES, V22, P6, DOI 10.1577/1548-8446(1997)022<0006:WANFIO>2.0.CO;2; Hulme PE, 2005, J APPL ECOL, V42, P784, DOI 10.1111/j.1365-2664.2005.01082.x; Lawler JJ, 2009, ANN NY ACAD SCI, V1162,…	44	0	0	31	31	TAYLOR & FRANCIS INC	PHILADELPHIA	530 WALNUT STREET, STE 850, PHILADELPHIA, PA 19106 USA	0363-2415	1548-8446		FISHERIES	Fisheries	2015-07-03	2015	40	7
J	Papenfuss, JT; Phelps, N; Fulton, D; Venturelli, PA				Papenfuss, Jason T.; Phelps, Nicholas; Fulton, David; Venturelli, Paul A.			Smartphones Reveal Angler Behavior: A Case Study of a Popular Mobile Fishing Application in Alberta, Canada	FISHERIES			English	Article							OVERLAND DISPERSAL; CITIZEN SCIENCE; FRESH-WATER; RECREATIONAL-FISHERIES; BIOLOGICAL INVASIONS; SOCIAL NETWORK; INLAND LAKES; RISK; COMPLEXITY; MANAGEMENT	Successfully managing fisheries and controlling the spread of invasive species depends on the ability to describe and predict angler behavior. However, finite resources restrict conventional survey approaches and tend to produce retrospective data that are limited in time or space and rely on intentions or attitudes rather than actual behavior. In this study, we used three years of angler data fr…	[Papenfuss, Jason T.; Venturelli, Paul A.] Univ Minnesota, Dept Fisheries Wildlife & Conservat Biol, St Paul, MN 55108 USA; [Phelps, Nicholas] Univ Minnesota, Dept Vet Populat Med, St Paul, MN 55108 USA; [Fulton, David] Univ Minnesota, Minnesota Cooperat Fish & Wildlife Res Unit, US Geol Survey, St Paul, MN 55108 USA	Papenfuss, JT (reprint author), Univ Minnesota, Dept Fisheries Wildlife & Conservat Biol, 135 Skok Hall,2003 Upper Buford Circle, St Paul, MN 55108 USA.	pventure@umn.edu	Venturelli, Paul/A-2337-2008	Venturelli, Paul/0000-0002-7329-7517	University of Minnesota	Funding was through the University of Minnesota.	Abou-Tair DEI, 2013, APPL MATH INFORM SCI, V7, P2137; Aggarwal C.C., 2012, MINING TEXT DATA; Faisal M, 2012, VIRUSES-BASEL, V4, P734, DOI 10.3390/v4050734; Liu JG, 2007, SCIENCE, V317, P1513, DOI 10.1126/science.1144004; Ward HGM, 2013, N AM J FISH MANAGE, V33, P576, DOI 10.1080/02755947.2013.785991; Cameron EK, 2007, ECOSCIENCE, V14, P482, DOI 10.2980/1195-6860(2007)14[482:HIOEEI]2.0.CO;2; Hawle…	53	0	0	20	20	TAYLOR & FRANCIS INC	PHILADELPHIA	530 WALNUT STREET, STE 850, PHILADELPHIA, PA 19106 USA	0363-2415	1548-8446		FISHERIES	Fisheries	2015-07-03	2015	40	7
J	Mukherjee, F				Mukherjee, Falguni			Public Participatory GIS	Geography Compass			English	Article							GEOGRAPHIC INFORMATION-SYSTEMS; VALUES; PPGIS; PRIORITIES; KNOWLEDGE; SCIENCE	Public Participatory GIS (PPGIS) is a very broad field, and because of the direct outgrowth addressing questions raised regarding inequitable access to GIS and its societal impacts, PPGIS has become an exhaustive research area. Over the past two decades, several PPGIS initiatives have taken place in the western and non-western world. Several avenues have opened up, but nonetheless, questions rega…	Sam Houston State Univ, Dept Geog & Geol, Huntsville, TX 77341 USA	Mukherjee, F (reprint author), Sam Houston State Univ, Dept Geog & Geol, POB 2148, Huntsville, TX 77341 USA.	fsm002@shsu.edu					Aitken S., 1995, CARTOGR GEOGR INF SC, V22, P17, DOI 10.1559/152304095782540519; Brown GG, 2013, J FOREST, V111, P115, DOI 10.5849/jof.12-087; Brown G, 2000, FOREST SCI, V46, P240; Brown GG, 2009, FOREST SCI, V55, P166; Kyem PAK, 2004, ANN ASSOC AM GEOGR, V94, P37, DOI 10.1111/j.1467-8306.2004.09401003.x; Kwan MP, 2002, ANN ASSOC AM GEOGR, V92, P645, DOI 10.1111/1467-8306.00309; Al-Kodmany K, 200…	84	0	0	0	0	WILEY-BLACKWELL	HOBOKEN	111 RIVER ST, HOBOKEN 07030-5774, NJ USA	1749-8198			GEOGR COMPASS	Geogr. Compass	JUL	2015	9	7
J	Sagl, G; Resch, B; Blaschke, T				Sagl, Guenther; Resch, Bernd; Blaschke, Thomas			Contextual Sensing: Integrating Contextual Information with Human and Technical Geo-Sensor Information for Smart Cities	SENSORS			English	Article						sensing; sensors; urban environments; urban dynamics; human-environment interaction; quality of life; geographic information science	VOLUNTEERED GEOGRAPHIC INFORMATION; URBAN AIR-QUALITY; GEOSPATIAL TECHNOLOGIES; DISASTER RESPONSE; GENERATED CONTENT; THERMAL COMFORT; DIGITAL EARTH; LOW-COST; NETWORKS; SYSTEM	In this article we critically discuss the challenge of integrating contextual information, in particular spatiotemporal contextual information, with human and technical sensor information, which we approach from a geospatial perspective. We start by highlighting the significance of context in general and spatiotemporal context in particular and introduce a smart city model of interactions between…	[Sagl, Guenther] Carinthia Univ Appl Sci, Dept Geoinformat & Environm Technol, A-9524 Villach, Austria; [Resch, Bernd; Blaschke, Thomas] Salzburg Univ, Dept Geoinformat Z GIS, A-5020 Salzburg, Austria; [Resch, Bernd] Heidelberg Univ, Dept Geog Chair GISci, D-69120 Heidelberg, Germany; [Resch, Bernd] Harvard Univ, Ctr Geog Anal, Cambridge, MA 02138 USA	Sagl, G (reprint author), Carinthia Univ Appl Sci, Dept Geoinformat & Environm Technol, Europastr 4, A-9524 Villach, Austria.	g.sagl@cuas.at; bernd.resch@sbg.ac.at; thomas.blaschke@sbg.ac.at			Austrian Science Fund FWF within the Doctoral College GIScience [DK W1237-N23]	The authors would like to thank the reviewers for their valuable comments and suggestions. This work has partially been financed by the Austrian Science Fund FWF within the Doctoral College GIScience (DK W1237-N23).	de Nazelle A, 2013, ENVIRON POLLUT, V176, P92, DOI 10.1016/j.envpol.2012.12.032; Nichol JE, 2010, ATMOS ENVIRON, V44, P2501, DOI 10.1016/j.atmosenv.2010.04.036; Steenbruggen J, 2013, TRANSPORT POLICY, V28, P86, DOI 10.1016/j.tranpol.2012.08.006; Palumbo F, 2014, SENSORS-BASEL, V14, P3833, DOI 10.3390/s140303833; Lukowicz P, 2011, IEEE PERVAS COMPUT, V10, P15, DOI 10.1109/MPRV.2011.67; Hong JY, 20…	149	0	0	12	12	MDPI AG	BASEL	POSTFACH, CH-4005 BASEL, SWITZERLAND	1424-8220			SENSORS-BASEL	Sensors	JUL	2015	15	7
J	Merlin, S; Locritani, M; Stroobant, M; Mioni, E; Tosi, D				Merlin, Silvia; Locritani, Marina; Stroobant, Mascha; Mioni, Erika; Tosi, Daniela			SeaCleaner: Focusing Citizen Science and Environment Education on Unraveling the Marine Litter Problem	MARINE TECHNOLOGY SOCIETY JOURNAL			English	Article						Android; citizen science; marine litter; mobile app; school training	WESTERN MEDITERRANEAN-SEA; WHALE BALAENOPTERA-PHYSALUS; PLASTIC PELLETS; CONTINENTAL-SHELF; FLOATING DEBRIS; ABUNDANCE; BEACHES; ACCUMULATION; MICROPLASTICS; POLLUTION	The Pilot Project SeaCleaner is a citizen science and educational project, developed by the Institute of Marine Sciences of the Italian Research Council (CNR-ISMAR). Since 2013, it has involved environmental nongovernmental organizations (NGOs), volunteers, five Italian Marine Protected Areas surrounding the Pelagos Sanctuary, and so far more than 50 high school students within the Italian progra…	[Merlin, Silvia] CNR, ISMAR, Inst Marine Sci, Italian Res Council, I-19032 Lerici, La Spezia, Italy; [Locritani, Marina] Ist Nazl Geofis & Vulcanol, La Spezia, Italy; [Stroobant, Mascha] Liguria Cluster Marine Technol DLTM, La Spezia, Italy; [Mioni, Erika] Ist Comprensivo Statale, La Spezia, Italy; [Tosi, Daniela] Ist Super Capellini Sauro, La Spezia, Italy	Merlin, S (reprint author), CNR, ISMAR, Inst Marine Sci, UOS Pozzuolo Lerici, Forte Santa Teresa, I-19032 Lerici, La Spezia, Italy.	silvia.merlino@sp.ismar.cnr.it			Polo DLTM; CNR-ISMAR (through the EFRD "DeepGEN" Project); European Commission's Research and Innovation Framework Programme H2020, Marie Sklodowska-Curie actions	This project has been partly financed by Polo DLTM, by CNR-ISMAR (through the EFRD "DeepGEN" Project), and by the European Commission's Research and Innovation Framework Programme H2020 (2014-2020), Marie Sklodowska-Curie actions. Thanks to the teachers (Tosi, Marini, Caselli, Manfredini, Vannucci, Pistelli, Traverso, Franceschini, Godani, and Casale); to Dr. Martucci, Eng. Bechini, and Dr. Marin…	Abramoff MD, 2004, BIOPHOTONICS INT, V11, P36, DOI DOI 10.1117/1.3589100; Aliani S, 2003, MAR POLLUT BULL, V46, P1142, DOI 10.1016/S0025-326X(03)00192-9; Delaney DG, 2008, BIOL INVASIONS, V10, P117, DOI 10.1007/s10530-007-9114-0; Andrady AL, 2011, MAR POLLUT BULL, V62, P1596, DOI 10.1016/j.marpolbul.2011.05.030; Fossi MC, 2012, MAR POLLUT BULL, V64, P2374, DOI 10.1016/j.marpolbul.2012.08.013; Eng…	91	0	0	11	11	MARINE TECHNOLOGY SOC INC	COLUMBIA	5565 STERRETT PLACE, STE 108, COLUMBIA, MD 21044 USA	0025-3324	1948-1209		MAR TECHNOL SOC J	Mar. Technol. Soc. J.	JUL-AUG	2015	49	4
J	Scyphers, SB; Powers, SP; Akins, JL; Drymon, JM; Martin, CW; Schobernd, ZH; Schofield, PJ; Shipp, RL; Switzer, TS				Scyphers, Steven B.; Powers, Sean P.; Akins, J. Lad; Drymon, J. Marcus; Martin, Charles W.; Schobernd, Zeb H.; Schofield, Pamela J.; Shipp, Robert L.; Switzer, Theodore S.			The Role of Citizens in Detecting and Responding to a Rapid Marine Invasion	CONSERVATION LETTERS			English	Article						Citizen science; conservation planning; participatory management; Pterois volitans; social-ecological systems	LIONFISHES PTEROIS-VOLITANS; INDO-PACIFIC LIONFISH; SPECIES INVASIONS; ATLANTIC; SCIENCE; FISHERMEN; INSIGHTS; BAHAMAS; SYSTEMS; FUTURE	Documenting and responding to species invasions requires innovative strategies that account for ecological and societal complexities. We used the recent expansion of Indo-Pacific lionfish (Pterois volitans/miles) throughout northern Gulf of Mexico coastal waters to evaluate the role of stakeholders in documenting and responding to a rapid marine invasion. We coupled an online survey of spearfishe…	[Scyphers, Steven B.] Northeastern Univ, Ctr Marine Sci, Dept Marine & Environm Sci, Nahant, MA 01908 USA; [Powers, Sean P.; Drymon, J. Marcus] Univ S Alabama, Dept Marine Sci, Dauphin Isl, AL 36528 USA; [Powers, Sean P.; Drymon, J. Marcus] Dauphin Isl Sea Lab, Dauphin Isl, AL 36528 USA; [Akins, J. Lad] Reef Environm Educ Fdn, Key Largo, FL 33037 USA; [Martin, Charles W.] Louisiana State Univ, De…	Scyphers, SB (reprint author), Northeastern Univ, Ctr Marine Sci, Dept Marine & Environm Sci, Nahant, MA 01908 USA.	s.scyphers@neu.edu			NOAA Fisheries; USGS Invasive Species Program; Alabama Department of Conservation and Natural Resources; Marine Resources Division; Florida Fish and Wildlife Research Institute; National Science Foundation [OCE-1215825]	We appreciate J Fodrie, R McMichael, T Kellison, W Helt, P Levin, M Ruckelshaus, A Knight and reviewers for comments that improved our manuscript. This work was supported in part by NOAA Fisheries, USGS Invasive Species Program, Alabama Department of Conservation and Natural Resources, Marine Resources Division, the Florida Fish and Wildlife Research Institute, and the National Science Foundation…	Agresti A., 2002, CATEGORICAL DATA ANA; Akins J. L., 2012, INVASIVE LIONFISH GU, P24; Delaney DG, 2008, BIOL INVASIONS, V10, P117, DOI 10.1007/s10530-007-9114-0; Nunez MA, 2012, CONSERV LETT, V5, P334, DOI 10.1111/j.1755-263X.2012.00250.x; Sax DF, 2008, P NATL ACAD SCI USA, V105, P11490, DOI 10.1073/pnas.0802290105; Whitfield PE, 2002, MAR ECOL PROG SER, V235, P289, DOI 10.3354/meps235289; Jud ZR…	36	1	1	24	24	WILEY-BLACKWELL	HOBOKEN	111 RIVER ST, HOBOKEN 07030-5774, NJ USA	1755-263X			CONSERV LETT	Conserv. Lett.	JUL-AUG	2015	8	4
J	Brunsting, S; Mastop, J; Kaiser, M; Zimmer, R; Shackley, S; Mabon, L; Howell, R				Brunsting, Suzanne; Mastop, Jessanne; Kaiser, Marta; Zimmer, Rene; Shackley, Simon; Mabon, Leslie; Howell, Rhys			CCS Acceptability: Social Site Characterization and Advancing Awareness at Prospective Storage Sites in Poland and Scotland	OIL & GAS SCIENCE AND TECHNOLOGY-REVUE D IFP ENERGIES NOUVELLES			English	Article							CARBON-DIOXIDE CAPTURE; PUBLIC PERCEPTIONS; CITIZEN PARTICIPATION; ENGAGEMENT; TECHNOLOGY; ACCEPTANCE; SCIENCE	This paper summarizes the work on the social dimension conducted within the EU FP7 SiteChar project. The most important aim of the research was to advance public awareness and draw lessons for successful public engagement activities when developing a CO2 storage permit application. To this end, social site characterization (e.g. representative surveys) and public participation activities (focus c…	[Brunsting, Suzanne; Mastop, Jessanne] Energy Res Ctr Netherlands, NL-1043 NT Amsterdam, Netherlands; [Kaiser, Marta; Zimmer, Rene] Remember Shaping Change Together, D-14467 Potsdam, Germany; [Shackley, Simon; Mabon, Leslie; Howell, Rhys] Univ Edinburgh, Sch GeoSci, Old Lib, Edinburgh EH8 9XP, Midlothian, Scotland	Brunsting, S (reprint author), Energy Res Ctr Netherlands, Radarweg 60, NL-1043 NT Amsterdam, Netherlands.	brunsting@ecn.nl; mastop@ecn.nl; marta.kaiser@remember-wandel.de; rene.zimmer@remember-wandel.de; simon.shackley@ed.ac.uk; leslie.mabon@ed.ac.uk		Mabon, Leslie/0000-0003-2646-6119	European Union [256705]; Enel; Gassnova; PGNiG; Statoil; Vattenfall; Veolia Environnement; Scottish Government	The research leading to these results has received funding from the European Union Seventh Framework Programme (FP7/2007-2013) under grant agreement No. 256705 (SiteChar project) as well as from Enel, Gassnova, PGNiG, Statoil, Vattenfall, Veolia Environnement, and the Scottish Government. The authors would like to express thanks to the following partners in work package 8 who contributed to the r…	Ter Mors E, 2010, J ENVIRON PSYCHOL, V30, P347, DOI 10.1016/j.jenvp.2010.06.001; Wynne B, 2006, COMMUNITY GENET, V9, P211, DOI 10.1159/000092659; Einsiedel EF, 2001, PUBLIC UNDERST SCI, V10, P83; Brunsting S, 2011, ENRGY PROCED, V4, P6376, DOI 10.1016/j.egypro.2011.02.655; Rowe G, 2005, SCI TECHNOL HUM VAL, V30, P251, DOI 10.1177/0162243904271724; Brunsting S, 2011, INT J GREENH GAS CON, V5, P165…	44	2	2	5	5	EDITIONS TECHNIP	PARIS 15	27 RUE GINOUX, 75737 PARIS 15, FRANCE	1294-4475	1953-8189		OIL GAS SCI TECHNOL	Oil Gas Sci. Technol.	JUL-AUG	2015	70	4
J	Asare-Kyei, D; Forkuor, G; Venus, V				Asare-Kyei, Daniel; Forkuor, Gerald; Venus, Valentijn			Modeling Flood Hazard Zones at the Sub-District Level with the Rational Model Integrated with GIS and Remote Sensing Approaches	WATER			English	Article						community; flood hazard index; GIS; mapping; West Africa; rational model; runoff	CLIMATE-CHANGE; WEST-AFRICA; VULNERABILITY; PERFORMANCE; IMPACT; RISK	Robust risk assessment requires accurate flood intensity area mapping to allow for the identification of populations and elements at risk. However, available flood maps in West Africa lack spatial variability while global datasets have resolutions too coarse to be relevant for local scale risk assessment. Consequently, local disaster managers are forced to use traditional methods such as watermar…	[Asare-Kyei, Daniel] UNU EHS, D-53113 Bonn, Germany; [Forkuor, Gerald] Univ Wurzburg, Dept Remote Sensing, D-97074 Wurzburg, Germany; [Venus, Valentijn] Univ Twente, Fac Geoinformat Sci & Earth Observat ITC, Dept Nat Resources, NL-7500 AE Enschede, Netherlands	Asare-Kyei, D (reprint author), UNU EHS, UN Campus,Pl Vereinten Nationen 1, D-53113 Bonn, Germany.	asare-kyei@ehs.unu.edu; gerald.forkuor@uni-wuerzburg.de; venus@itc.nl			German Federal Ministry of Education and Research (BMBF) under the West African Science Service Center for Climate Change and Adapted Land Use (WASCAL) project	We are grateful for the financial support provided by the German Federal Ministry of Education and Research (BMBF) under the auspices of the West African Science Service Center for Climate Change and Adapted Land Use (WASCAL) project. We are also grateful to the local disaster managers in Bolgatanga, Bongo, Dano and Dassari whose inputs have greatly enriched this manuscript.	Al-Rawas G., 2001, EARTH OBSERVATION MA, V10, P18; Amoako P.Y.O., 2009, HAZARD MAPPING GHANA; Islam MM, 2000, HYDROL PROCESS, V14, P605, DOI 10.1002/(SICI)1099-1085(20000228)14:3<605::AID-HYP957>3.0.CO;2-L; Dunn CE, 2007, PROG HUM GEOG, V31, P616, DOI 10.1177/0309132507081493; Stehman SV, 1998, REMOTE SENS ENVIRON, V64, P331, DOI 10.1016/S0034-4257(98)00010-8; Roudier P, 2011, GLOBAL ENVIRON CHAN…	78	0	0	13	13	MDPI AG	BASEL	POSTFACH, CH-4005 BASEL, SWITZERLAND	2073-4441			WATER-SUI	Water	JUL	2015	7	7
J	Loos, J; Horcea-Milcu, AI; Kirkland, P; Hartel, T; Osvath-Ferencz, M; Fischer, J				Loos, Jacqueline; Horcea-Milcu, Andra I.; Kirkland, Paul; Hartel, Tibor; Osvath-Ferencz, Marta; Fischer, Joern			Challenges for biodiversity monitoring using citizen science in transitioning social-ecological systems	JOURNAL FOR NATURE CONSERVATION			English	Article						Awareness raising; Butterfly monitoring; Capacity building; Civil Society; Romania; Volunteers	CIVIL-SOCIETY; POSTCOMMUNIST SOCIETIES; CONSERVATION POLICY; RURAL-DEVELOPMENT; ROMANIA; EUROPE; COUNTRIES; VOLUNTEERS; BENEFITS; TIME	Biodiversity monitoring requires sound data collection over large temporal and spatial scales in order to inform policy and conservation management. Citizen science programmes, if designed appropriately, can make valuable contributions to data collection and analyses. Moreover, citizen science has potential for both environmental education and civic participation. Recommendations on effective cit…	[Loos, Jacqueline; Horcea-Milcu, Andra I.; Fischer, Joern] Leuphana Univ, Fac Sustainabil, D-21335 Luneburg, Germany; [Kirkland, Paul] Butterfly Conservat Scotland, Stirling FK8 2QG, Scotland; [Hartel, Tibor] Sapientia Hungarian Univ Transylvania, Dept Environm Sci, Cluj Napoca, Romania; [Osvath-Ferencz, Marta] Univ Babes Bolyai, Fac Biol & Geol, R-3400 Cluj Napoca, Romania	Loos, J (reprint author), Leuphana Univ, Fac Sustainabil, Scharnhorststr 1, D-21335 Luneburg, Germany.	loos@leuphana.de			Butterfly Conservation Europe; European Interest Group; German Society for The Protection of Butterflies; Sofja-Kovalevskaja Award	We are grateful for discussions with J. Settele, M. Warren, C. van Swaay, M.S. Botham, L. Rakosy, M. Wiemers, E. Kahn, L. Petterson, B. Marko, M. Muguira, G. Peier, and to all the volunteers engaged with butterfly monitoring in Romania, especially K. Martini, A. Kastal and M. Stanescu. We thank Michael J.O. Pocock and two anonymous reviewers for helpful comments on an earlier version of this manu…	Stringer LC, 2009, APPL GEOGR, V29, P77, DOI 10.1016/j.apgeog.2008.07.008; Bell S, 2011, ENVIRON PLANN C, V29, P170, DOI 10.1068/c0872; Danielsen F, 2009, CONSERV BIOL, V23, P31, DOI 10.1111/j.1523-1739.2008.01063.x; Bonney R, 2009, BIOSCIENCE, V59, P977, DOI 10.1525/bio.2009.59.11.9; Bonney R, 2014, SCIENCE, V343, P1436, DOI 10.1126/science.1251554; Donald PF, 2007, SCIENCE, V317, P810, DOI 10.1…	38	0	0	37	37	ELSEVIER GMBH, URBAN & FISCHER VERLAG	JENA	OFFICE JENA, P O BOX 100537, 07705 JENA, GERMANY	1617-1381	1618-1093		J NAT CONSERV	J. Nat. Conserv.	JUL	2015	26
J	Miyazaki, Y; Murase, A; Shiina, M; Masui, R; Senou, H				Miyazaki, Yusuke; Murase, Atsunobu; Shiina, Masato; Masui, Ryuta; Senou, Hiroshi			Integrating and Utilizing Citizen Biodiversity Data on the Web for Science: An Example of a Rare Triggerfish Hybrid Image Provided by a Sport Fisherman	JOURNAL OF COASTAL RESEARCH			English	Article						Citizen science; FishPix; GBIF; parataxonomist; verifiability; voucher	SPECIMEN COLLECTION; SOUTHERN JAPAN; WATER FISHES; PERCIFORMES; DIVERSITY	We report a photograph of the rare triggerfish hybrid, Rhinecanthus aculeatus x R. rectangulus (order Tetraodontiformes; family Balistidae), from Miyako-jima Island, Ryukyu Islands, southern Japan, that was provided by a sport fisherman via WEB sakana-zukan (an online photographic database of fish in Japan). The image was registered in the Fish Image Database of the Kanagawa Prefectural Museum of…	[Miyazaki, Yusuke; Senou, Hiroshi] Kanagawa Prefectural Museum Nat Hist, Odawara, Kanagawa 2500031, Japan; [Murase, Atsunobu] Tokyo Univ Marine Sci & Technol, Fac Marine Sci, Lab Ichthyol, Tokyo 1088477, Japan; [Shiina, Masato] Uwajima Fisheries High Sch, Ehime 7980068, Japan	Miyazaki, Y (reprint author), Kanagawa Prefectural Museum Nat Hist, Odawara, Kanagawa 2500031, Japan.	yukke-bibimba@10.alumni.u-tokyo.ac.jp			Japan Society for the Promotion of Science [25 . 11038]; Ministry of Education, Culture, Sports, Science and Technology in Japan [24501278]	We thank all participants in the KPM-NR database and WEB sakana-zukan. We are grateful to Dr. K. Matsuura and anonymous reviewers for comments on the manuscript. This work was supported by the Japan Society for the Promotion of Science (Research Fellowship for Young Scientists No. 25 . 11038 to Y. Miyazaki) and by the Ministry of Education, Culture, Sports, Science and Technology in Japan (Grants…	Adams J., 2012, HYBRID TRIGGERFISH S; Rocha LA, 2014, SCIENCE, V344, P814, DOI 10.1126/science.344.6186.814; Krell FT, 2014, SCIENCE, V344, P815, DOI 10.1126/science.344.6186.815; Sullivan BL, 2014, BIOL CONSERV, V169, P31, DOI 10.1016/j.biocon.2013.11.003; Miyazaki Y, 2014, BIODIVERS CONSERV, V23, P2383, DOI 10.1007/s10531-014-0724-4; Bariche Michel, 2012, Marine Biodiversity Records, V5, pe1, D…	35	0	0	5	5	COASTAL EDUCATION & RESEARCH FOUNDATION	LAWRENCE	810 EAST 10TH STREET, LAWRENCE, KS 66044 USA	0749-0208	1551-5036		J COASTAL RES	J. Coast. Res.	JUL	2015	31	4
J	Boero, F; Kraberg, AC; Krause, G; Wiltshire, KH				Boero, F.; Kraberg, A. C.; Krause, G.; Wiltshire, K. H.			Time is an affliction: Why ecology cannot be as predictive as physics and why it needs time series	JOURNAL OF SEA RESEARCH			English	Article						Biodiversity; Citizen science; Long-term data; Taxonomy	WESTERN ENGLISH-CHANNEL; HELGOLAND GERMAN BIGHT; CLIMATE-CHANGE; NORTH-SEA; ECOSYSTEM; PHYTOPLANKTON; BIODIVERSITY; MANAGEMENT; FRAMEWORK; ENVIRONMENT	Ecological systems depend on both constraints and historical contingencies, both of which shape their present observable system state. In contrast to ahistorical systems, which are governed solely by constraints (i.e. laws), historical systems and their dynamics can be understood only if properly described, in the course of time. Describing these dynamics and understanding long-term variability c…	[Boero, F.] Univ Salento, CoNISMa, DiSTeBA, I-73100 Lecce, Italy; [Boero, F.] CNR, ISMAR, I-16149 Genoa, Italy; [Kraberg, A. C.; Wiltshire, K. H.] Helmholtz Ctr Polar & Marine Res, Alfred Wegener Inst, Biol Anstalt Helgoland, D-27498 Helgoland, Germany; [Krause, G.] Helmholtz Ctr Polar & Marine Res, Alfred Wegener Inst, D-27570 Bremerhaven, Germany	Kraberg, AC (reprint author), Helmholtz Ctr Polar & Marine Res, Alfred Wegener Inst, Biol Anstalt Helgoland, Kurpromenade 201, D-27498 Helgoland, Germany.	Alexandra.Kraberg@awi.de		Boero, Ferdinando/0000-0002-6317-2710	flagship project RITMARE; EU [287844]; EU integrated project VECTORS; EU integrated project PERSEUS; EU project MED-Jellyrisk	Financial support from the flagship project RITMARE, the EU FP7/2007-2013, Grant Agreement No. 287844 for the FP7 project "CoCoNet", PRIN and the EU integrated projects VECTORS, PERSEUS, and the EU project MED-Jellyrisk.	Adams LG, 2009, OCEANOGRAPHY, V22, P12; Zingone A, 2010, ESTUAR COAST, V33, P342, DOI 10.1007/s12237-009-9157-9; Helmuth B, 2006, ANNU REV ECOL EVOL S, V37, P373, DOI 10.1146/annurev.ecolsys.37.091305.110149; Bennis WG, 2005, HARVARD BUS REV, V83, P96; LEVINS R, 1979, AM NAT, V114, P765, DOI 10.1086/283527; Metfies K, 2005, BIOSENS BIOELECTRON, V20, P1349, DOI 10.1016/j.bios.2004.05.011; Gillson …	74	1	1	17	17	ELSEVIER SCIENCE BV	AMSTERDAM	PO BOX 211, 1000 AE AMSTERDAM, NETHERLANDS	1385-1101	1873-1414		J SEA RES	J. Sea Res.	JUL	2015	101				SI
J	Brosnan, T; Filep, S; Rock, J				Brosnan, Tess; Filep, Sebastian; Rock, Jenny			Exploring synergies: Hopeful tourism and citizen science	ANNALS OF TOURISM RESEARCH			English	Editorial Material									[Brosnan, Tess; Filep, Sebastian; Rock, Jenny] Univ Otago, Dunedin 9054, New Zealand; [Filep, Sebastian] Univ Victoria, Victoria, BC V8W 2Y2, Canada	Filep, S (reprint author), Univ Otago, Dept Tourism, POB 56, Dunedin 9054, New Zealand.	tessabrosnan@gmail.com; sebastian.filep@otago.ac.nz; jenny.rock@otago.ac.nz			University of Otago	The lead author wishes to express her gratitude to the University of Otago for awarding her a publishing bursary, which facilitated the collaboration among the authors and led to the development of this manuscript.	Pritchard A, 2011, ANN TOURISM RES, V38, P941, DOI 10.1016/j.annals.2011.01.004; Miller-Rushing A, 2012, FRONT ECOL ENVIRON, V10, P285, DOI 10.1890/110278; Hand E, 2010, NATURE, V466, P685, DOI 10.1038/466685a; Castaneda Q., 2012, PRACTICING ANTHR, V34, P47; Chatterton P, 2008, ANTIPODE, V40, P421, DOI 10.1111/j.1467-8330.2008.00609.x; Clemmons D., 2013, VOLUNTOURISM NEWSLET; Dickinson J. L., 201…	15	0	0	10	10	PERGAMON-ELSEVIER SCIENCE LTD	OXFORD	THE BOULEVARD, LANGFORD LANE, KIDLINGTON, OXFORD OX5 1GB, ENGLAND	0160-7383			ANN TOURISM RES	Ann. Touris. Res.	JUL	2015	53
J	Miller, G; Wickson, F				Miller, Georgia; Wickson, Fern			Risk Analysis of Nanomaterials: Exposing Nanotechnology's Naked Emperor	REVIEW OF POLICY RESEARCH			English	Review						nanotechnology; nanotoxicology; uncertainty; risk assessment; regulation; policy	ENGINEERED NANOMATERIALS; PUBLIC ENGAGEMENT; GM CROPS; SCIENCE; HEALTH; POLICY; NANOPARTICLES; PERSPECTIVES; UNCERTAINTY; GOVERNANCE	Risk analysis (encompassing risk assessment, management, and communication) is touted internationally as the most appropriate approach for governing nanomaterials. In this article, we survey existing criticisms of risk assessment as a basis for regulatory decision making on emerging technologies, particularly highlighting its exclusion of key societal dimensions, its epistemological underdetermin…	[Miller, Georgia] Univ New S Wales, Sch Humanities & Languages, Sci & Technol Studies, Sydney, NSW, Australia; [Wickson, Fern] Genok Ctr Biosafety, Soc Ecol & EthpDept, Tromso, Norway	Miller, G (reprint author), Univ New S Wales, Sch Humanities & Languages, Sci & Technol Studies, Sydney, NSW, Australia.				Norwegian Research Council [203288, 239199]; European Commission [310584]	Fern Wickson gratefully acknowledges the following financial support for the work done in this paper: Funding from the Norwegian Research Council (Grant Numbers 203288 & 239199) and the European Commission (Grant Agreement 310584).	Allhoff F, 2010, WHAT IS NANOTECHNOLO; Altmann J, 2010, ELGAR ORIG REF, P372; Pellizzoni L, 2004, ENVIRON POLIT, V13, P541, DOI 10.1080/0964401042000229034; Donaldson K, 2001, OCCUP ENVIRON MED, V58, P211, DOI 10.1136/oem.58.3.211; [Anonymous], 2011, NAN RES DIR SOC; Faunce T, 2010, NANOMEDICINE-UK, V5, P617, DOI [10.2217/nnm.10.33, 10.2217/NNM.10.33]; [Anonymous], 2008, NATURE NANOTECHNOLOG, V3,…	147	2	2	25	25	WILEY-BLACKWELL	HOBOKEN	111 RIVER ST, HOBOKEN 07030-5774, NJ USA	1541-132X	1541-1338		REV POLICY RES	Rev. Policy Res.	JUL	2015	32	4
J	Memarsadeghi, N				Memarsadeghi, Nargess			Citizen Science INTRODUCTION	COMPUTING IN SCIENCE & ENGINEERING			English	Editorial Material						scientific computing; citizen science; crowdsourcing; distributed computing; STEM; education; FPCCS			NASA, Goddard Space Flight Ctr, Washington, DC 20546 USA	Memarsadeghi, N (reprint author), NASA, Goddard Space Flight Ctr, Washington, DC 20546 USA.	Nargess.Memarsadeghi@nasa.gov						0	0	0	12	12	IEEE COMPUTER SOC	LOS ALAMITOS	10662 LOS VAQUEROS CIRCLE, PO BOX 3014, LOS ALAMITOS, CA 90720-1314 USA	1521-9615	1558-366X		COMPUT SCI ENG	Comput. Sci. Eng.	JUL-AUG	2015	17	4
J	Christian, C				Christian, Carol			Citizen Science with Hubble Space Telescope Data	COMPUTING IN SCIENCE & ENGINEERING			English	Article						Morphology; Telescopes; Catalogs; Astronomy; Visualization; Probes; History; scientific computing; citizen science; astronomy; science research; outreach	DISK CLUSTER POPULATION; GALAXY ZOO; M31; PHOTOMETRY; POINTINGS; FIELDS	There are many flavors of citizen science today; those involving Hubble Space Telescope data are of the visual classification variety and aimed specifically at producing unique scientific results that would be difficult, if not impossible, to accomplish without large numbers of volunteers.	Space Telescope Sci Inst, Baltimore, MD 21218 USA	Christian, C (reprint author), Space Telescope Sci Inst, Baltimore, MD 21218 USA.	carolc@stsci.edu			Space Telescope Science Institute (STScI) under NASA [NAS5-26555]	Support for this work was provided by the Space Telescope Science Institute (STScI), which is operated by the Association of Universities for Research in Astronomy, under NASA contract NAS5-26555. Advice and encouragement on citizen science projects using HST data from the STScI director, Matt Mountain, head of the HST Mission Office at STScI, Ken Sembach, and numerous other individuals is greatl…	Lintott CJ, 2008, MON NOT R ASTRON SOC, V389, P1179, DOI 10.1111/j.1365-2966.2008.13689.x; Barmby P, 2006, ASTROPHYS J, V650, pL45, DOI 10.1086/508626; Beerman LC, 2012, ASTROPHYS J, V760, DOI 10.1088/0004-637X/760/2/104; Bellazzini M, 2003, ASTRON ASTROPHYS, V405, P867, DOI 10.1051/0004-6361:20030455; Chandar R., 2010, ASTROPHYS J, V719, P966; Christian C., 2012, CITIZEN SCI CONTRIBU, V1, P183; …	21	0	0	5	5	IEEE COMPUTER SOC	LOS ALAMITOS	10662 LOS VAQUEROS CIRCLE, PO BOX 3014, LOS ALAMITOS, CA 90720-1314 USA	1521-9615	1558-366X		COMPUT SCI ENG	Comput. Sci. Eng.	JUL-AUG	2015	17	4
J	Jambeck, JR; Johnsen, K				Jambeck, Jenna R.; Johnsen, Kyle			Citizen-Based Litter and Marine Debris Data Collection and Mapping	COMPUTING IN SCIENCE & ENGINEERING			English	Article						Oceans; Plastics; Communities; Mobile communication; Education; Portals; Media; scientific computing; participatory sensing; mobile application; citizen science; plastic pollution	ENVIRONMENT; OCEAN	The monitoring of litter and debris is challenging at the global scale because of disconnected local organizations and the use of paper and pen for documentation. The Marine Debris Tracker mobile app and citizen science program allows for the collection of global standardized data at a scale, speed, and efficiency that wasn't previously possible.	[Jambeck, Jenna R.; Johnsen, Kyle] Univ Georgia, Coll Engn, Athens, GA 30602 USA; [Johnsen, Kyle] Univ Georgia, Franklin Coll Arts & Sci, Dept Comp Sci, Athens, GA 30602 USA	Jambeck, JR (reprint author), Univ Georgia, Coll Engn, Athens, GA 30602 USA.	jjambeck@uga.edu; kjohnsen@uga.edu			NOAA Marine Debris Program	We acknowledge the NOAA Marine Debris Program for funding this work and providing valuable input over the development of both versions of the MDT. We also acknowledge Aryabata Basu for his work in the first iOS version of MDT and Miriam Perryman for her work on creating the Geographic Information System maps for this manuscript.	Andrady AL, 2011, MAR POLLUT BULL, V62, P1596, DOI 10.1016/j.marpolbul.2011.05.030; Jambeck JR, 2015, SCIENCE, V347, P768, DOI 10.1126/science.1260352; Bonney R, 2014, SCIENCE, V343, P1436, DOI 10.1126/science.1251554; Zettler ER, 2013, ENVIRON SCI TECHNOL, V47, P7137, DOI 10.1021/es401288x; Law KL, 2010, SCIENCE, V329, P1185, DOI 10.1126/science.1192321; Wang C, 1996, SOC SCI MED, V42, P1391, DO…	13	0	0	17	17	IEEE COMPUTER SOC	LOS ALAMITOS	10662 LOS VAQUEROS CIRCLE, PO BOX 3014, LOS ALAMITOS, CA 90720-1314 USA	1521-9615	1558-366X		COMPUT SCI ENG	Comput. Sci. Eng.	JUL-AUG	2015	17	4
J	Cox, J; Oh, EY; Simmons, B; Lintott, C; Masters, K; Greenhill, A; Graham, G; Holmes, K				Cox, Joe; Oh, Eun Young; Simmons, Brooke; Lintott, Chris; Masters, Karen; Greenhill, Anita; Graham, Gary; Holmes, Kate			Defining and Measuring Success in Online Citizen Science: A Case Study of Zooniverse Projects	COMPUTING IN SCIENCE & ENGINEERING			English	Article						Atmospheric measurements; Particle measurements; Extraterrestrial measurements; Blogs; Twitter; Position measurement; Computers; scientific computing; citizen science; online; project outcomes; success factors; metrics; Zooniverse	KNOWLEDGE; OUTCOMES; LESSONS; IMPACT	Current literature highlights a wide variety of potential citizen science project outcomes, but no prior studies have systematically assessed performance against a comprehensive set of criteria. A novel framework applied to the Zooniverse platform illustrates how a success matrix can measure both contribution to science and public engagement levels relative to other projects.	[Cox, Joe; Oh, Eun Young] Univ Portsmouth, Sch Business, Portsmouth PO1 2UP, Hants, England; [Simmons, Brooke] Univ Oxford, Black Holes & Galaxies, Oxford OX1 2JD, England; [Lintott, Chris] Univ Oxford, Astrophys, Oxford OX1 2JD, England; [Lintott, Chris] Univ Oxford, New Coll, Oxford OX1 2JD, England; [Masters, Karen] Univ Portsmouth, Inst Cosmol & Gravitat, Portsmouth PO1 2UP, Hants, England; […	Cox, J (reprint author), Univ Portsmouth, Sch Business, Portsmouth PO1 2UP, Hants, England.	joe.cox@port.ac.uk; ey.oh@port.ac.uk; brooke.simmons@physics.ox.ac.uk; chris.lintott@physics.ox.ac.uk; karen.masters@port.ac.uk; a.greenhill@mbs.ac.uk; g.graham@lubs.leeds.ac.uk; kateholmes2006@hotmail.co.uk			Engineering and Physical Sciences Research Council (EPSRC); New Economic Models in the Digital Economy (NEMODE) Network+	We acknowledge the Engineering and Physical Sciences Research Council (EPSRC) and New Economic Models in the Digital Economy (NEMODE) Network+ for funding this research as part of the Volunteer and Crowdsourcing Economics (Volcrowe) project. We also thank Zooniverse for its cooperation.	Trumbull DJ, 2000, SCI EDUC, V84, P265, DOI 10.1002/(SICI)1098-237X(200003)84:2<265::AID-SCE7>3.0.CO;2-5; Lintott CJ, 2008, MON NOT R ASTRON SOC, V389, P1179, DOI 10.1111/j.1365-2966.2008.13689.x; Bonney R, 2009, BIOSCIENCE, V59, P977, DOI 10.1525/bio.2009.59.11.9; Brossard D, 2005, INT J SCI EDUC, V27, P1099, DOI 10.1080/09500690500069483; Gardiner MM, 2012, FRONT ECOL ENVIRON, V10, P471, DOI 10…	29	0	0	16	16	IEEE COMPUTER SOC	LOS ALAMITOS	10662 LOS VAQUEROS CIRCLE, PO BOX 3014, LOS ALAMITOS, CA 90720-1314 USA	1521-9615	1558-366X		COMPUT SCI ENG	Comput. Sci. Eng.	JUL-AUG	2015	17	4
J	Morais, AMM; Santos, RDC; Raddick, MJ				Morais, Alessandra Marli M.; Santos, Rafael D. C.; Raddick, M. Jordan			Visualization of Citizen Science Volunteers' Behaviors with Data from Usage Logs	COMPUTING IN SCIENCE & ENGINEERING			English	Article						Data visualization; Collaboration; Shape; Visualization; Data collection; Interviews; Object recognition; scientific computing; citizen science; log analysis; visualization; clustering		Web-based citizen science projects collect logs of interactions between volunteers and project websites. Visualization techniques can help infer volunteer behavior in such projects, perhaps shedding light on why people join or leave them. Better understanding of these factors could help citizen science project developers recruit and retain their volunteers.	[Morais, Alessandra Marli M.] Natl Inst Space Res INPE, Appl Comp Program, Sao Jose Dos Campos, Brazil; [Santos, Rafael D. C.] Natl Inst Space Res INPE, Sao Jose Dos Campos, Brazil; [Raddick, M. Jordan] Johns Hopkins Univ, Baltimore, MD 21218 USA	Morais, AMM (reprint author), Natl Inst Space Res INPE, Appl Comp Program, Sao Jose Dos Campos, Brazil.	alessandra.marli@unifesp.br; santos@inpe.br; raddick@jhu.edu			Brazilian Research Council (CNPq) [132205/2014-9]	Alessandra Morais was supported by the Brazilian Research Council (CNPq), grant 132205/2014-9. We thank all the volunteers and other collaborators from the Galaxy Zoo project and the anonymous reviewers for this article. For the scripts used to create the plots, please contact rafael.santos@inpe.br.	Lintott CJ, 2008, MON NOT R ASTRON SOC, V389, P1179, DOI 10.1111/j.1365-2966.2008.13689.x; Jain AK, 2010, PATTERN RECOGN LETT, V31, P651, DOI 10.1016/j.patrec.2009.09.011; Jordan Raddick M., 2010, ASTRONOMY ED REV; Kohonen T., 2001, SELF ORGANIZING MAPS; Morais A.M.M., 2013, NEXT GENERATION ANAL, P1; Ponciano L, 2014, COMPUT SCI ENG, V16, P52, DOI 10.1109/MCSE.2014.4; Raddick M.J., 2009, ASTRO201…	8	0	0	11	11	IEEE COMPUTER SOC	LOS ALAMITOS	10662 LOS VAQUEROS CIRCLE, PO BOX 3014, LOS ALAMITOS, CA 90720-1314 USA	1521-9615	1558-366X		COMPUT SCI ENG	Comput. Sci. Eng.	JUL-AUG	2015	17	4
J	Mabon, L; Shackley, S; Blackford, JC; Stahl, H; Miller, A				Mabon, Leslie; Shackley, Simon; Blackford, Jerry C.; Stahl, Henrik; Miller, Anuschka			Local perceptions of the QICS experimental offshore CO2 release: Results from social science research	INTERNATIONAL JOURNAL OF GREENHOUSE GAS CONTROL			English	Article						Carbon dioxide capture and storage (CCS); Environmental risk; Environmental uncertainty; Offshore energy; Public engagement	CARBON-DIOXIDE STORAGE; PUBLIC PERCEPTIONS; PROJECT; INNOVATION; WEYBURN; POLICY	This paper explores the social dimensions of an experimental release of carbon dioxide (CO2) carried out in Ardmucknish Bay, Argyll, United Kingdom. The experiment, which aimed to understand detectability and potential effects on the marine environment should there be any leakage from a CO2 storage site, provided a rare opportunity to study the social aspects of a carbon dioxide capture and stora…	[Mabon, Leslie] Robert Gordon Univ, Sch Appl Social Studies, Aberdeen AB10 7QG, Scotland; [Shackley, Simon] Univ Edinburgh, Sch Geosci, Edinburgh EH8 9XP, Midlothian, Scotland; [Blackford, Jerry C.] Plymouth Marine Lab, Plymouth PL1 3DH, Devon, England; [Stahl, Henrik; Miller, Anuschka] Scottish Assoc Marine Sci, Scottish Marine Inst, Oban PA37 1QA, Argyll, Scotland; [Stahl, Henrik] Zayed Univ, D…	Mabon, L (reprint author), Robert Gordon Univ, Sch Appl Social Studies, Aberdeen AB10 7QG, Scotland.	l.j.mabon@rgu.ac.uk; simon.shackley@ed.ac.uk; jcb@pml.ac.uk; henrik.stahl@sams.ac.uk; anuschka.miller@sams.ac.uk		Mabon, Leslie/0000-0003-2646-6119	European Union [265847-ECO2]; Natural Environment Research Council (NERC) [NE/H013962/1]	The research leading to these results has received funding from the European Union Seventh Framework Programme [FP7/2007-2013] under grant agreement no. 265847-ECO<INF>2</INF>: impacts of sub-seabed CO<INF>2</INF> storage on marine ecosystems. This research was possible thanks to a Memorandum of Understanding with the Natural Environment Research Council (NERC)-funded QICS project (Grant no. NE/H…	Taylor P, 2015, INT J GREENH GAS CON, V38, P3, DOI 10.1016/j.ijggc.2014.09.007; de Best-Waldhober M, 2009, INT J GREENH GAS CON, V3, P322, DOI 10.1016/j.ijggc.2008.09.001; Boyd AD, 2013, INT J GREENH GAS CON, V14, P259, DOI 10.1016/j.ijggc.2013.01.011; Howell R, 2014, ENERG POLICY, V66, P496, DOI 10.1016/j.enpol.2013.11.041; Upham P, 2011, INT J GREENH GAS CON, V5, P1359, DOI 10.1016/j.ijggc.2011…	34	1	1	6	6	ELSEVIER SCI LTD	OXFORD	THE BOULEVARD, LANGFORD LANE, KIDLINGTON, OXFORD OX5 1GB, OXON, ENGLAND	1750-5836	1878-0148		INT J GREENH GAS CON	Int. J. Greenh. Gas Control	JUL	2015	38				SI
J	Jarvis, RM; Breen, BB; Krageloh, CU; Billington, DR				Jarvis, Rebecca M.; Breen, Barbara Bollard; Kraegeloh, Christian U.; Billington, D. Rex			Citizen science and the power of public participation in marine spatial planning	MARINE POLICY			English	Article						Marine spatial planning; Citizen science; Public participation; Stakeholder engagement; Local knowledge; Environmental health	IN-PLACE VALUES; ECOLOGICAL RESEARCH; GIS PPGIS; CHALLENGES; TOOL	Marine spatial planning (MSP) is becoming increasingly used in the sustainable management of marine and coastal ecosystems. However, limitations on time and resources often restrict the data available for MSP and limit public engagement and participation in the MSP process. While citizen science is being increasingly used to provide fine-scale environmental data across large terrestrial planning …	[Jarvis, Rebecca M.; Breen, Barbara Bollard] Auckland Univ Technol, Inst Appl Ecol New Zealand, Sch Appl Sci, Auckland 1142, New Zealand; [Kraegeloh, Christian U.; Billington, D. Rex] Auckland Univ Technol, Sch Publ Hlth & Psychosocial Studies, Auckland 1142, New Zealand	Jarvis, RM (reprint author), Auckland Univ Technol, Inst Appl Ecol New Zealand, Sch Appl Sci, Private Bag 92006, Auckland 1142, New Zealand.	rjarvis@aut.ac.nz			Hauraki Gulf Marine Park spatial planning partnership (Sea Change - Tai Timu Tai Pan); Auckland Council; Waikato Regional Council; Hauraki Gulf Forum; Department of Conservation; Ministry for Primary Industries	The authors would like to thank the anonymous reviewers for their constructive and insightful comments. This project was conducted with the support of the Hauraki Gulf Marine Park spatial planning partnership (Sea Change - Tai Timu Tai Pan) involving mana whenua, Auckland Council, Waikato Regional Council, the Hauraki Gulf Forum, the Department of Conservation, and the Ministry for Primary Indust…	Nielsen-Pincus M, 2011, SOC NATUR RESOUR, V24, P535, DOI 10.1080/08941920903140972; Isaac NJB, 2014, METHODS ECOL EVOL, V5, P1052, DOI 10.1111/2041-210X.12254; Shucksmith R, 2014, MAR POLICY, V50, P1, DOI 10.1016/j.marpol.2014.05.012; Dickinson JL, 2012, FRONT ECOL ENVIRON, V10, P291, DOI 10.1890/110236; Bonney R, 2014, SCIENCE, V343, P1436, DOI 10.1126/science.1251554; Danielsen F, 2014, BIOSCIE…	25	0	0	21	21	ELSEVIER SCI LTD	OXFORD	THE BOULEVARD, LANGFORD LANE, KIDLINGTON, OXFORD OX5 1GB, OXON, ENGLAND	0308-597X	1872-9460		MAR POLICY	Mar. Pol.	JUL	2015	57
J	Morzy, M				Morzy, Mikoaj			ICT Services for open and citizen science	WORLD WIDE WEB-INTERNET AND WEB INFORMATION SYSTEMS			English	Article						Open science; Citizen science; Web 2.0	PROJECT; SHOPS; TOOL	Ideas of open access, open data and open science are transforming the world of scientific inquiry as we speak. Every day thousands of ordinary citizens are engaging in data collection and data processing, giving rise to the new field of citizen science. Never before has the technology enabled scientists to reach out to such vast numbers of collaborators and show their work to the public. From pat…	Poznan Univ Tech, Inst Comp Sci, Poznan, Poland	Morzy, M (reprint author), Poznan Univ Tech, Inst Comp Sci, Poznan, Poland.	Mikolaj.Morzy@put.poznan.pl	Morzy, Mikolaj/A-1748-2008	Morzy, Mikolaj/0000-0002-2905-9538	National Science Centre [2011/03/B/ST6/01563]	Research supported by the National Science Centre grant 2011/03/B/ST6/01563	Trumbull DJ, 2000, SCI EDUC, V84, P265, DOI 10.1002/(SICI)1098-237X(200003)84:2<265::AID-SCE7>3.0.CO;2-5; Evans C, 2005, CONSERV BIOL, V19, P589, DOI 10.1111/j.1523-1739.2005.00s01.x; Bonney R, 2009, BIOSCIENCE, V59, P977, DOI 10.1525/bio.2009.59.11.9; Leydesdorff L, 2005, PUBLIC UNDERST SCI, V14, P353, DOI 10.1177/0963662505056612; Cooper CB, 2007, ECOL SOC, V12; Wachelder J, 2003, SCI TECHNOL H…	19	0	0	13	13	SPRINGER	NEW YORK	233 SPRING ST, NEW YORK, NY 10013 USA	1386-145X	1573-1413		WORLD WIDE WEB	World Wide Web	JUL	2015	18	4
J	Pocock, MJO; Roy, HE; Preston, CD; Roy, DB				Pocock, Michael J. O.; Roy, Helen E.; Preston, Chris D.; Roy, David B.			The Biological Records Centre: a pioneer of citizen science	BIOLOGICAL JOURNAL OF THE LINNEAN SOCIETY			English	Article						Britain; distribution; monitoring; participation; recording; trends; UK; volunteer; wildlife	ECOLOGICAL RESEARCH; DISTRIBUTION PATTERNS; PUBLIC-PARTICIPATION; SCIENTIFIC-RESEARCH; GREAT-BRITAIN; RANGE; TOOL; CONSERVATION; BIODIVERSITY; CLIMATE	People have been recording wildlife for centuries and the resulting datasets lead to important scientific research. The Biological Records Centre (BRC), established in 1964, is a national focus for terrestrial and freshwater species recording in the United Kingdom (UK). BRC works with the voluntary recording community (i.e. a mutualistic symbiosis) through support of national recording schemes (i…	[Pocock, Michael J. O.; Roy, Helen E.; Preston, Chris D.; Roy, David B.] Ctr Ecol & Hydrol, Biol Records Ctr, Wallingford OX10 8BB, Oxon, England	Pocock, MJO (reprint author), Ctr Ecol & Hydrol, Biol Records Ctr, Maclean Bldg,Benson Lane, Wallingford OX10 8BB, Oxon, England.	michael.pocock@ceh.ac.uk	Roy, David/A-6619-2009; Pocock, Michael/A-5632-2012	Roy, David/0000-0002-5147-0331; Pocock, Michael/0000-0003-4375-0445	Joint Nature Conservation Committee; Natural Environment Research Council [NEC04932]	Foremost, our acknowledgement go to the thousands of volunteer recorders and especially the volunteer experts who commit so much time as national recording scheme organisers and record verifiers. Without their contribution our knowledge of British wildlife would be so much poorer. The Biological Record Centre receives support from the Joint Nature Conservation Committee and the Natural Environmen…	Aitkenhead P, 1981, EPPO B, V11, P225, DOI 10.1111/j.1365-2338.1981.tb01928.x; Allen D. E., 1976, NATURALIST BRITAIN S; Oliver T, 2010, ECOL LETT, V13, P473, DOI 10.1111/j.1461-0248.2010.01441.x; SECORD A, 1994, BRIT J HIST SCI, V27, P383; Chen IC, 2011, SCIENCE, V333, P1024, DOI 10.1126/science.1206432; Maes D, 2015, BIOL J LINN SOC, V115, P690, DOI 10.1111/bij.12530; Isaac NJB, 2014, METHODS EC…	120	9	9	18	18	WILEY-BLACKWELL	HOBOKEN	111 RIVER ST, HOBOKEN 07030-5774, NJ USA	0024-4066	1095-8312		BIOL J LINN SOC	Biol. J. Linnean Soc.	JUL	2015	115	3			SI
J	Pescott, OL; Walker, KJ; Pocock, MJO; Jitlal, M; Outhwaite, CL; Cheffings, CM; Harris, F; Roy, DB				Pescott, Oliver L.; Walker, Kevin J.; Pocock, Michael J. O.; Jitlal, Mark; Outhwaite, Charlotte L.; Cheffings, Christine M.; Harris, Felicity; Roy, David B.			Ecological monitoring with citizen science: the design and implementation of schemes for recording plants in Britain and Ireland	BIOLOGICAL JOURNAL OF THE LINNEAN SOCIETY			English	Article						atlas; biological recording; botany; long-term monitoring; participatory monitoring; surveillance monitoring; volunteer surveying	GLOBAL BIODIVERSITY INDICATORS; NITROGEN DEPOSITION; HABITAT CHANGE; GREAT-BRITAIN; ATLAS DATA; CONSERVATION; PROGRAMS; BRITISH; ENGLAND; TOOL	Interest in citizen science has been increasing rapidly, although the reviews available to date have not clearly outlined the links between the long-established practice of recording plant species' distributions for local and national atlases, or other recording projects, and the gradual development of more structured monitoring schemes that also rely on volunteer effort. We provide a review of v…	[Pescott, Oliver L.; Pocock, Michael J. O.; Jitlal, Mark; Outhwaite, Charlotte L.; Roy, David B.] Ctr Ecol & Hydrol, Biol Records Ctr, Wallingford OX10 8BB, Oxon, England; [Walker, Kevin J.] Bot Soc Britain & Ireland, Harrogate HG1 1SS, England; [Cheffings, Christine M.] Joint Nat Conservat Comm, Peterborough PE1 1JY, Cambs, England; [Harris, Felicity] Plantlife, Salisbury SP1 1DX, Wilts, England	Pescott, OL (reprint author), Ctr Ecol & Hydrol, Biol Records Ctr, Maclean Bldg,Benson Lane, Wallingford OX10 8BB, Oxon, England.	olipes@ceh.ac.uk	Roy, David/A-6619-2009; Pocock, Michael/A-5632-2012	Roy, David/0000-0002-5147-0331; Pocock, Michael/0000-0003-4375-0445	Joint Nature Conservation Committee; Natural Environment Research Council [NEC04932]	We thank Chris D. Preston for many helpful comments on the text. We also thank Stuart Newson and one anonymous reviewer for comments that improved the paper. We are indebted to the following individuals who contributed to the development of the National Plant Monitoring Scheme: Adam Butler, David Elston, David Noble, Ian Strachan, Iain Diack, Louise Marsh, Lynn Heeley, John Redhead, Peter Henrys,…	Allen D. E., 1976, NATURALIST BRITAIN S; Allen DE, 1986, THE BOT; Waite M, 2010, NEW PHYTOL, V185, P156, DOI 10.1111/j.1469-8137.2009.03061.x; Thomas JA, 2005, PHILOS T ROY SOC B, V360, P339, DOI 10.1098/rstb.2004.1585; Hooftman DAP, 2012, BIOL CONSERV, V145, P30, DOI 10.1016/j.biocon.2011.09.015; Miller JR, 2005, TRENDS ECOL EVOL, V20, P430, DOI 10.1016/j.tree.2005.05.013; Butchart SHM, 2010, SC…	137	4	4	19	19	WILEY-BLACKWELL	HOBOKEN	111 RIVER ST, HOBOKEN 07030-5774, NJ USA	0024-4066	1095-8312		BIOL J LINN SOC	Biol. J. Linnean Soc.	JUL	2015	115	3			SI
J	Isaac, NJB; Pocock, MJO				Isaac, Nick J. B.; Pocock, Michael J. O.			Bias and information in biological records	BIOLOGICAL JOURNAL OF THE LINNEAN SOCIETY			English	Article						citizen science; GBIF; human behaviour; information content; recording behaviour	CITIZEN SCIENCE; IMPERFECT DETECTION; TRENDS; POPULATIONS; BUTTERFLIES; ABUNDANCE; IRELAND; BRITAIN; MODELS; PLANTS	Biological recording is in essence a very simple concept in which a record is the report of a species at a physical location at a certain time. The collation of these records into a dataset is a powerful approach to addressing large-scale questions about biodiversity change. Records are collected by volunteers at times and places that suit them, leading to a variety of biases: uneven sampling ove…	[Isaac, Nick J. B.; Pocock, Michael J. O.] NERC Ctr Ecol & Hydrol, Biol Records Ctr, Wallingford OX10 8BB, Oxon, England	Isaac, NJB (reprint author), NERC Ctr Ecol & Hydrol, Biol Records Ctr, Maclean Bldg,Benson Lane, Wallingford OX10 8BB, Oxon, England.	njbi@ceh.ac.uk	Isaac, Nick/C-2716-2011; Pocock, Michael/A-5632-2012	Isaac, Nick/0000-0002-4869-8052; Pocock, Michael/0000-0003-4375-0445	Joint Nature Conservation Committee; Natural Environment Research Council [NEC04932]	The concepts in this paper have emerged from detailed discussions with many users and producers of biological records. In particular, we are grateful to Elizabeth Boakes, Steve Cham, Mike Edwards, Mark Hill, Marc Kery, Georgina Mace, Roger Morris, Andy Musgrove, Steve Prentice, Chris Preston, Stuart Roberts, Dave Smallshire, Bill Sutherland, Pam Taylor, Chris Thomas, Arco van Strien, one anonymou…	Royle JA, 2003, ECOLOGY, V84, P777, DOI 10.1890/0012-9658(2003)084[0777:EAFRPA]2.0.CO;2; Szabo JK, 2010, ECOL APPL, V20, P2157, DOI 10.1890/09-0877.1; Maes D, 2015, BIOL J LINN SOC, V115, P690, DOI 10.1111/bij.12530; Isaac NJB, 2014, METHODS ECOL EVOL, V5, P1052, DOI 10.1111/2041-210X.12254; Tingley MW, 2009, TRENDS ECOL EVOL, V24, P625, DOI 10.1016/j.tree.2009.05.009; Jost L, 2006, OIKOS, V113, …	42	6	6	19	19	WILEY-BLACKWELL	HOBOKEN	111 RIVER ST, HOBOKEN 07030-5774, NJ USA	0024-4066	1095-8312		BIOL J LINN SOC	Biol. J. Linnean Soc.	JUL	2015	115	3			SI
J	Powney, GD; Isaac, NJB				Powney, Gary D.; Isaac, Nick J. B.			Beyond maps: a review of the applications of biological records	BIOLOGICAL JOURNAL OF THE LINNEAN SOCIETY			English	Article						biodiversity; citizen science; climate change; distribution change; range shift; richness; species trends	AVIAN SPECIES RICHNESS; CLIMATE-CHANGE; CITIZEN SCIENCE; EXTINCTION RISK; UTILIZATION DISTRIBUTIONS; PHYLOGENETIC DIVERSITY; DISTRIBUTION PATTERNS; BRITISH BUTTERFLIES; ECOLOGICAL RESEARCH; RANGE BOUNDARIES	Biological records are one of the most important sources of data for a large number of research areas. For example, their application has made valuable contributions to climate change ecology, where they are used to monitor species range shifts; to conservation ecology, where they are used to assess species' Red List status; and to biogeography, where they are used to highlight hotspots of biodiv…	[Powney, Gary D.; Isaac, Nick J. B.] NERC Ctr Ecol & Hydrol, Wallingford OX10 8BB, Oxon, England	Powney, GD (reprint author), NERC Ctr Ecol & Hydrol, Maclean Bldg,Benson Lane, Wallingford OX10 8BB, Oxon, England.	gary.powney@ceh.ac.uk	Isaac, Nick/C-2716-2011	Isaac, Nick/0000-0002-4869-8052	Joint Nature Conservation Committee; Natural Environment Research Council [NEC04932]	We would like to thanks Chris Preston and an anonymous reviewer who gave valuable feedback on an early draft of this manuscript. This work was supported by the Joint Nature Conservation Committee and the Natural Environment Research Council (via National Capability funding to the Centre for Ecology and Hydrology, project NEC04932).	Srivastava DS, 2012, ECOL LETT, V15, P637, DOI 10.1111/j.1461-0248.2012.01795.x; Willis CG, 2008, P NATL ACAD SCI USA, V105, P17029, DOI 10.1073/pnas.0806446105; Polce C, 2011, GLOBAL ECOL BIOGEOGR, V20, P367, DOI 10.1111/j.1466-8238.2010.00619.x; Hurlbert AH, 2007, P NATL ACAD SCI USA, V104, P13384, DOI 10.1073/pnas.0704469104; Sorte CJB, 2010, GLOBAL ECOL BIOGEOGR, V19, P303, DOI 10.1111/j.1466…	136	9	9	38	38	WILEY-BLACKWELL	HOBOKEN	111 RIVER ST, HOBOKEN 07030-5774, NJ USA	0024-4066	1095-8312		BIOL J LINN SOC	Biol. J. Linnean Soc.	JUL	2015	115	3			SI
J	Chapman, DS; Bell, S; Helfer, S; Roy, DB				Chapman, Daniel S.; Bell, Sandra; Helfer, Stephan; Roy, David B.			Unbiased inference of plant flowering phenology from biological recording data	BIOLOGICAL JOURNAL OF THE LINNEAN SOCIETY			English	Article						Bayesian model; citizen science; climate change; discrete Fourier transform; growing degree days; phenology model; recorder effort	CLIMATE-CHANGE; CITIZEN SCIENCE; BIAS; 1ST; TEMPERATURE; BUTTERFLIES	Phenology is a key indicator and mediator of the ecological impacts of climate change. However, studies monitoring the phenology of individual species are moderate in number, taxonomically and geographically restricted, and mainly focused on spring events. As such, attention is being given to nonstandard sources of phenology data, such as the dates of species' biological records. Here, we present…	[Chapman, Daniel S.] Ctr Ecol & Hydrol, Edinburgh EH26 0QB, Midlothian, Scotland; [Bell, Sandra] Royal Bot Gardens, Richmond TW9 3AB, Surrey, England; [Helfer, Stephan] Royal Bot Gardens, Edinburgh EH3 5LR, Midlothian, Scotland; [Roy, David B.] Ctr Ecol & Hydrol, Wallingford OX10 8BB, Oxon, England	Chapman, DS (reprint author), Ctr Ecol & Hydrol, Bush Estate, Edinburgh EH26 0QB, Midlothian, Scotland.	dcha@ceh.ac.uk	Roy, David/A-6619-2009; Chapman, Daniel/C-2900-2008	Roy, David/0000-0002-5147-0331; Chapman, Daniel/0000-0003-1836-4112	Joint Nature Conservation Committee; Natural Environment Research Council [NEC04932]	We are indebted to the many volunteers who have contributed to the Botanical Society of Britain and Ireland recording scheme and the phenological monitoring at the Royal Botanic Garden Edinburgh. We thank Myra Miller, Marion Piper, David Rowe and Margaret Sorrell for collecting phenology data at RBG Kew. The Biological Record Centre receives support from the Joint Nature Conservation Committee an…	Sherry RA, 2007, P NATL ACAD SCI USA, V104, P198, DOI 10.1073/pnas.0605642104; SOWTER FA, 1949, J ECOL, V37, P207, DOI 10.2307/2256754; Phillimore AB, 2010, P NATL ACAD SCI USA, V107, P8292, DOI 10.1073/pnas.0913792107; Isaac NJB, 2014, METHODS ECOL EVOL, V5, P1052, DOI 10.1111/2041-210X.12254; HEIDELBERGER P, 1983, OPER RES, V31, P1109, DOI 10.1287/opre.31.6.1109; Cleland EE, 2012, ECOLOGY, V93,…	43	3	3	16	16	WILEY-BLACKWELL	HOBOKEN	111 RIVER ST, HOBOKEN 07030-5774, NJ USA	0024-4066	1095-8312		BIOL J LINN SOC	Biol. J. Linnean Soc.	JUL	2015	115	3			SI
J	Pescott, OL; Simkin, JM; August, TA; Randle, Z; Dore, AJ; Botham, MS				Pescott, Oliver L.; Simkin, Janet M.; August, Tom A.; Randle, Zoe; Dore, Anthony J.; Botham, Marc S.			Air pollution and its effects on lichens, bryophytes, and lichen-feeding Lepidoptera: review and evidence from biological records	BIOLOGICAL JOURNAL OF THE LINNEAN SOCIETY			English	Article						acidification; ammonia; bioindicators; citizen science; cryptogam; environmental change; nitrogen oxides; sulphur dioxide	ATMOSPHERIC NITROGEN DEPOSITION; SULFUR-DIOXIDE; PHYSIOLOGICAL-RESPONSES; XANTHORIA-PARIETINA; ACIDIC GRASSLANDS; EPIPHYTIC LICHENS; SPECIES-RICHNESS; RESISTANT LICHEN; RAMALINA-DURIAEI; SCHOOL-CHILDREN	Changing air quality has been one of the most important drivers of change for bryophytes and lichens in Britain and Ireland over the 20th Century, with acidic pollutants such as sulphur dioxide having large effects on the ranges and abundances of many species. At the same time, expert amateur and professional naturalists have put enormous efforts into recording the distributions of species within…	[Pescott, Oliver L.; August, Tom A.; Botham, Marc S.] Ctr Ecol & Hydrol, Wallingford OX10 8BB, Oxon, England; [Simkin, Janet M.] British Lichen Soc, Lichen Herbarium, Nat Hist Museum, Dept Life Sci, London SW7 5BD, England; [Randle, Zoe] Butterfly Conservat, Wareham BH20 5QP, Dorset, England; [Dore, Anthony J.] Ctr Ecol & Hydrol, Penicuik EH26 0QB, Midlothian, Scotland	Pescott, OL (reprint author), Ctr Ecol & Hydrol, Maclean Bldg,Benson Lane, Wallingford OX10 8BB, Oxon, England.	olipes@ceh.ac.uk			Joint Nature Conservation Committee; Natural Environment Research Council [NEC04932]	We are very grateful to Chris D. Preston and Mark O. Hill for providing thoughtful comments on the manuscript. Mark Hill also generously provided unpublished data on bryophyte distributional change derived from analyses performed for the Atlas of British and Irish Bryophytes (2014). We thank Jeff Bates and one anonymous reviewer for their helpful comments. We also thank Steph L. Rorke and Colin H…	Adams KJ, 1992, BIOL RECORDING CHANG, P31; Adams KJ, 1974, FLORA ESSEX, P229; Agassiz D, 2013, CHECKLIST LEPIDOPTER; Agresti A., 2002, CATEGORICAL DATA ANA; Aikin A, 1797, J NATURAL PHILOS CHE, V1, P367; Fox R, 2013, INSECT CONSERV DIVER, V6, P5, DOI 10.1111/j.1752-4598.2012.00186.x; Dore AJ, 2007, ATMOS ENVIRON, V41, P2355, DOI 10.1016/j.atmosenv.2006.11.013; GRUBB PJ, 1977, BIOL REV, V52, P107,…	150	5	5	34	34	WILEY-BLACKWELL	HOBOKEN	111 RIVER ST, HOBOKEN 07030-5774, NJ USA	0024-4066	1095-8312		BIOL J LINN SOC	Biol. J. Linnean Soc.	JUL	2015	115	3			SI
J	Roy, HE; Rorke, SL; Beckmann, B; Booy, O; Botham, MS; Brown, PMJ; Harrower, C; Noble, D; Sewell, J; Walker, K				Roy, Helen E.; Rorke, Steph L.; Beckmann, Bjoern; Booy, Olaf; Botham, Marc S.; Brown, Peter M. J.; Harrower, Colin; Noble, David; Sewell, Jack; Walker, Kevin			The contribution of volunteer recorders to our understanding of biological invasions	BIOLOGICAL JOURNAL OF THE LINNEAN SOCIETY			English	Article						biological recording; citizen science; early warning; habitat; impact; invasion biology; surveillance	DARWINS NATURALIZATION HYPOTHESIS; PLANT INVASIONS; GREAT-BRITAIN; IMPACTS; GLOBALIZATION; BIODIVERSITY; INVASIBILITY; METAANALYSIS; COMMUNITIES; EXTINCTION	The process of invasion and the desire to predict the invasiveness (and associated impacts) of new arrivals has been a focus of attention for ecologists over centuries. The volunteer recording community has made unique and inspiring contributions to our understanding of invasion biology within Britain. Indeed information on non-native species (NNS) compiled within the GB Non-Native Species Inform…	[Roy, Helen E.; Rorke, Steph L.; Beckmann, Bjoern; Botham, Marc S.; Harrower, Colin] Ctr Ecol & Hydrol, Biol Records Ctr, Wallingford OX10 8BB, Oxon, England; [Booy, Olaf] Anim Hlth & Vet Labs Agcy AHVLA, Nonnat Species Secretariat, Sand Hutton YO41 1LZ, England; [Brown, Peter M. J.] Anglia Ruskin Univ, Dept Life Sci, Anim & Environm Res Grp, Cambridge CB1 1PT, England; [Noble, David] British Tru…	Roy, HE (reprint author), Ctr Ecol & Hydrol, Biol Records Ctr, Benson Lane, Wallingford OX10 8BB, Oxon, England.	hele@ceh.ac.uk	APHA, Staff publications/E-6082-2010		Defra; Joint Nature Conservation Committee; Natural Environment Research Council [NEC04932]; COST Action ALIEN Challenge [TD1209]	We are indebted to the many volunteers who have generously and enthusiastically contributed their expertise and observations. We would like to thank Chris Preston and anonymous reviewers for their insightful comments. The GB-NNSIP is co-funded through Defra in partnership with support from the Joint Nature Conservation Committee and the Natural Environment Research Council (via National Capabilit…	Anderson LG, 2014, PLOS ONE, V9, DOI 10.1371/journal.pone.0092788; Manchester SJ, 2000, J APPL ECOL, V37, P845, DOI 10.1046/j.1365-2664.2000.00538.x; Vila M, 2011, ECOL LETT, V14, P702, DOI 10.1111/j.1461-0248.2011.01628.x; Pysek P, 2010, P NATL ACAD SCI USA, V107, P12157, DOI 10.1073/pnas.1002314107; McKinney ML, 1999, TRENDS ECOL EVOL, V14, P450, DOI 10.1016/S0169-5347(99)01679-1; Meyerson LA, …	62	6	6	26	26	WILEY-BLACKWELL	HOBOKEN	111 RIVER ST, HOBOKEN 07030-5774, NJ USA	0024-4066	1095-8312		BIOL J LINN SOC	Biol. J. Linnean Soc.	JUL	2015	115	3			SI
J	Maes, D; Isaac, NJB; Harrower, CA; Collen, B; Van Strien, AJ; Roy, DB				Maes, Dirk; Isaac, Nick J. B.; Harrower, Colin A.; Collen, Ben; Van Strien, Arco J.; Roy, David B.			The use of opportunistic data for IUCN Red List assessments	BIOLOGICAL JOURNAL OF THE LINNEAN SOCIETY			English	Article						Britain; citizen science; Europe; Flanders (north Belgium); geographic range size; threatened species; trend calculations	FLANDERS NORTH BELGIUM; SPECIES DISTRIBUTION MODELS; CONSERVATION STATUS; UTILIZATION DISTRIBUTIONS; BIODIVERSITY HOTSPOTS; BRITISH BUTTERFLIES; REGIONAL GUIDELINES; UNITED-KINGDOM; HOME RANGES; CRITERIA	IUCN Red Lists are recognized worldwide as powerful instruments for the conservation of species. Quantitative criteria to standardize approaches for estimating population trends, geographic ranges and population sizes have been developed at global and sub-global levels. Little attention has been given to the data needed to estimate species trends and range sizes for IUCN Red List assessments. Few…	[Maes, Dirk] Res Inst Nat & Forest INBO, B-1070 Brussels, Belgium; [Isaac, Nick J. B.; Harrower, Colin A.; Roy, David B.] CEH Wallingford, Biol Records Ctr, Wallingford OX10 8BB, Oxon, England; [Collen, Ben] UCL, Dept Genet Evolut & Environm, Ctr Biodivers & Environm Res, London WC1E 6BT, England; [Van Strien, Arco J.] Stat Netherlands, NL-2490 HA The Hague, Netherlands	Maes, D (reprint author), Res Inst Nat & Forest INBO, Klin Str 25, B-1070 Brussels, Belgium.	dirk.maes@inbo.be	Maes, Dirk/B-1819-2009; Isaac, Nick/C-2716-2011; Roy, David/A-6619-2009	Isaac, Nick/0000-0002-4869-8052; Roy, David/0000-0002-5147-0331	Joint Nature Conservation Committee; Natural Environmental Research Council [NEC04932]	We are indebted to all the many volunteers who collect data on the occurrence of species and made them available for research and conservation. The Biological Records Centre is part of the Centre for Ecology & Hydrology and receives funding from the Joint Nature Conservation Committee and the Natural Environment Research Council. CH, NI and DR were funded by the CEH National Capability funding fr…	Adriaens T, 2015, INSECT CONSERV DIVER, V8, P404, DOI 10.1111/icad.12124; Ainsworth AM, 2013, RED LIST FUNGI GREAT; Possingham HP, 2002, TRENDS ECOL EVOL, V17, P503, DOI 10.1016/S0169-5347(02)02614-9; Van Dyck H, 2009, CONSERV BIOL, V23, P957, DOI 10.1111/j.1523-1739.2009.01175.x; Dennis RLH, 1999, J INSECT CONSERV, V3, P33, DOI 10.1023/A:1009678422145; Syfert MM, 2014, BIOL CONSERV, V177, P174, …	130	11	11	21	21	WILEY-BLACKWELL	HOBOKEN	111 RIVER ST, HOBOKEN 07030-5774, NJ USA	0024-4066	1095-8312		BIOL J LINN SOC	Biol. J. Linnean Soc.	JUL	2015	115	3			SI
J	August, T; Harvey, M; Lightfoot, P; Kilbey, D; Papadopoulos, T; Jepson, P				August, Tom; Harvey, Martin; Lightfoot, Paula; Kilbey, David; Papadopoulos, Timos; Jepson, Paul			Emerging technologies for biological recording	BIOLOGICAL JOURNAL OF THE LINNEAN SOCIETY			English	Article						biological recording; citizen science; data capture; technology	MONITORING PROGRAMS; SCIENCE; IDENTIFICATION; INFORMATION; CLASSIFICATION; NEOGEOGRAPHY; PUBLICATION; RECOGNITION; SCRATCHPADS; BIRDSONG	Technology has played an important role in biological recording for hundreds of years, from the invention of the microscope to the microprocessor. We review current and emerging technologies that are changing the way we study and record the natural world. From websites to smartphones, data capture is becoming easier, faster and more accessible. Increases in data volume and wider participation rai…	[August, Tom] NERC, Ctr Ecol & Hydrol, Wallingford OX10 8BB, Oxon, England; [Harvey, Martin] Open Univ, Fac Sci, Milton Keynes MK7 6AA, Bucks, England; [Lightfoot, Paula] Natl Forum Biol Recording, Loughborough, Leics, England; [Kilbey, David] Univ Bristol, IT Serv, Bristol, Avon, England; [Papadopoulos, Timos] Univ Oxford, Biodivers Inst, Oxford, England; [Jepson, Paul] Univ Oxford, Sch Geog & E…	August, T (reprint author), NERC, Ctr Ecol & Hydrol, Wallingford OX10 8BB, Oxon, England.	tomaug@ceh.ac.uk		Harvey, Martin/0000-0001-7512-2449	Joint Nature Conservation Committee; Natural Environment Research Council [NEC04932]	We thank two anonymous reviewers for their helpful comments. The Biological Record Centre receives support from the Joint Nature Conservation Committee and the Natural Environment Research Council (via National Capability funding to the Centre for Ecology & Hydrology, project NEC04932).	Galton F, 1907, NATURE, V75, P450, DOI 10.1038/075450a0; Lintott CJ, 2008, MON NOT R ASTRON SOC, V389, P1179, DOI 10.1111/j.1365-2966.2008.13689.x; Smith VS, 2011, ZOOKEYS, P53, DOI 10.3897/zookeys.150.2193; Maes D, 2015, BIOL J LINN SOC, V115, P690, DOI 10.1111/bij.12530; Isaac NJB, 2014, METHODS ECOL EVOL, V5, P1052, DOI 10.1111/2041-210X.12254; Wilson MW, 2013, ENVIRON PLANN A, V45, P3, DOI 10…	67	11	11	15	15	WILEY-BLACKWELL	HOBOKEN	111 RIVER ST, HOBOKEN 07030-5774, NJ USA	0024-4066	1095-8312		BIOL J LINN SOC	Biol. J. Linnean Soc.	JUL	2015	115	3			SI
J	Handley, LL				Handley, Lori Lawson			How will the "molecular revolution' contribute to biological recording?	BIOLOGICAL JOURNAL OF THE LINNEAN SOCIETY			English	Article						biodiversity monitoring; citizen science; DNA barcoding; eDNA; environmental DNA; invasive species; metabarcoding; molecular food webs; trophic interactions	ENVIRONMENTAL DNA; PREY DNA; BIODIVERSITY ASSESSMENT; MYOTIS-LUCIFUGUS; ARTHROPOD PREY; BALLAST WATER; LAND PLANTS; SAMPLES; DIET; PCR	Soaring throughput, plummeting costs, and increased sensitivity for assaying degraded or low-concentration DNA are driving a revolution in the way that we monitor biodiversity. Arguably the biggest game-changer' is environmental DNA (eDNA), which refers to free-floating DNA released by organisms into their environment. Rare or elusive species can be detected with greater sensitivity and accuracy …	Univ Hull, Sch Biol Biomed & Environm Sci, Evolutionary Biol Grp, Kingston Upon Hull HU6 7RX, N Humberside, England	Handley, LL (reprint author), Univ Hull, Sch Biol Biomed & Environm Sci, Evolutionary Biol Grp, Cottingham Rd, Kingston Upon Hull HU6 7RX, N Humberside, England.	l.lawson-handley@hull.ac.uk					Alberdi A, 2012, PLOS ONE, V7, DOI 10.1371/journal.pone.0035692; Kowalczyk R, 2011, FOREST ECOL MANAG, V261, P821, DOI 10.1016/j.foreco.2010.11.026; Sonstebo JH, 2010, MOL ECOL RESOUR, V10, P1009, DOI 10.1111/j.1755-0998.2010.02855.x; Brown DS, 2014, MOL ECOL, V23, P3695, DOI 10.1111/mec.12445; Leung B, 2002, P ROY SOC B-BIOL SCI, V269, P2407, DOI 10.1098/rspb.2002.2179; Thomsen PF, 2012, MOL ECO…	116	6	6	74	74	WILEY-BLACKWELL	HOBOKEN	111 RIVER ST, HOBOKEN 07030-5774, NJ USA	0024-4066	1095-8312		BIOL J LINN SOC	Biol. J. Linnean Soc.	JUL	2015	115	3			SI
J	Sutherland, WJ; Roy, DB; Amano, T				Sutherland, William J.; Roy, David B.; Amano, Tatsuya			An agenda for the future of biological recording for ecological monitoring and citizen science	BIOLOGICAL JOURNAL OF THE LINNEAN SOCIETY			English	Article						Biological Records Centre; Britain; UK; distribution; monitoring; participation; volunteer	OCCUPANCY MODELS; CONSERVATION; BIODIVERSITY; PROGRAMS; DECLINES; SERVICES; TRENDS; BIRDS; TOOL	The UK has a rich legacy of biological recording, developed through the expertise and commitment of volunteer participants. The Biological Records Centre has supported this activity in the UK since 1964, in close partnership with recording schemes and societies. Vast datasets have been built up and enabled a range of ecological questions to be addressed. We consider the future priorities for the …	[Sutherland, William J.; Amano, Tatsuya] Univ Cambridge, Dept Zool, Conservat Sci Grp, Cambridge CB2 3EJ, England; [Roy, David B.] Ctr Ecol & Hydrol, Biol Records Ctr, Wallingford OX10 8BB, Oxon, England	Sutherland, WJ (reprint author), Univ Cambridge, Dept Zool, Conservat Sci Grp, Downing St, Cambridge CB2 3EJ, England.	w.sutherland@zoo.cam.ac.uk	Roy, David/A-6619-2009	Roy, David/0000-0002-5147-0331	Arcadia; Joint Nature Conservation Committee; Natural Environment Research Council [NEC04932]; European Commission's Marie Curie International Incoming Fellowship Programme	We express our admiration and thanks to the thousands of volunteer recorders and organizers of recording schemes, whose enthusiasm and hard work has provided a wealth of knowledge on the wildlife of Britain and Ireland. The work of the BRC builds upon their efforts. We thank the speakers and participants at the symposium celebrating the 50th anniversary of the BRC that stimulated this paper. We t…	Amano T, 2013, P ROY SOC LOND B BIO, V280, P1756; Thomsen PF, 2012, MOL ECOL, V21, P2565, DOI 10.1111/j.1365-294X.2011.05418.x; Maes D, 2015, BIOL J LINN SOC, V115, P690, DOI 10.1111/bij.12530; Isaac NJB, 2014, METHODS ECOL EVOL, V5, P1052, DOI 10.1111/2041-210X.12254; Corlett RT, 2015, TRENDS ECOL EVOL, V30, P36, DOI 10.1016/j.tree.2014.10.007; Dickinson JL, 2012, FRONT ECOL ENVIRON, V10, P291, …	54	3	3	24	24	WILEY-BLACKWELL	HOBOKEN	111 RIVER ST, HOBOKEN 07030-5774, NJ USA	0024-4066	1095-8312		BIOL J LINN SOC	Biol. J. Linnean Soc.	JUL	2015	115	3			SI
J	Horita, FEA; de Albuquerque, JP; Degrossi, LC; Mendiondo, EM; Ueyama, J				Horita, Flavio E. A.; de Albuquerque, Joao Porto; Degrossi, Livia C.; Mendiondo, Eduardo M.; Ueyama, Jo			Development of a spatial decision support system for flood risk management in Brazil that combines volunteered geographic information with wireless sensor networks	COMPUTERS & GEOSCIENCES			English	Article						Flood risk management; Spatial decision support system; Volunteered geographic information; Wireless sensor network; Interoperability standards; Application case	DISASTER; COMMUNITY; SDI	Effective flood risk management requires updated information to ensure that the correct decisions can be made. This can be provided by Wireless Sensor Networks (WSN) which are a low-cost means of collecting updated information about rivers. Another valuable resource is Volunteered Geographic Information (VGI) which is a comparatively new means of improving the coverage of monitored areas because …	[Horita, Flavio E. A.; de Albuquerque, Joao Porto; Degrossi, Livia C.; Ueyama, Jo] Univ Sao Paulo, ICMC USP, Inst Math & Comp Sci, Sao Carlos, SP, Brazil; [Mendiondo, Eduardo M.] Univ Sao Paulo, EESC USP, Sao Carlos Sch Engn, Sao Carlos, SP, Brazil; [Mendiondo, Eduardo M.] CEMADEN MCTI, Minist Sci Tech & Innovat, Brazilian Ctr Monitoring & Early Warning Nat Disa, Sao Jose Dos Campos, SP, Brazil; …	Horita, FEA (reprint author), Univ Sao Paulo, ICMC USP, Inst Math & Comp Sci, Sao Carlos, SP, Brazil.	horita@icmc.usp.br	Albuquerque, Joao/E-6374-2011; Horita, Flavio/I-2316-2013	Albuquerque, Joao/0000-0002-3160-3168; Horita, Flavio/0000-0002-7138-9223	FAPESP-IVA project "Assessment of Impacts and Vulnerability to Climate Change in Brazil and Strategies for Adaptation Options" [2008/58161-1]; CAPES [24/2014, 12065-13-7]; FAPESP [2012/18675-1, 2012/22550-0]; Heidelberg University [2300054, 7812617]; CNPq [307637/2012-3]	The authors would like to express thanks for the financial support provided by the FAPESP-IVA project "Assessment of Impacts and Vulnerability to Climate Change in Brazil and Strategies for Adaptation Options" (Grant no. 2008/58161-1) and CAPES (Grant Edital Pro-alertas no. 24/2014). Joao Porto de Albuquerque is grateful for the financial support from FAPESP (Grant no. 2012/18675-1), CAPES (Grant…	Albuquerque J. P., 2013, PROCEEDINGS OF THE G, P1; Ahmad S, 2006, WATER RESOUR MANAG, V20, P391, DOI 10.1007/s11269-006-0326-3; De Longueville B, 2010, INT J DIGIT EARTH, V3, P242, DOI 10.1080/17538947.2010.484869; Mansourian A, 2006, COMPUT GEOSCI-UK, V32, P303, DOI 10.1016/j.cageo.2005.06.017; Molina M, 2011, COMPUT GEOSCI-UK, V37, P1501, DOI 10.1016/j.cageo.2011.01.015; Yates D, 2011, INT J IN…	55	1	1	36	36	PERGAMON-ELSEVIER SCIENCE LTD	OXFORD	THE BOULEVARD, LANGFORD LANE, KIDLINGTON, OXFORD OX5 1GB, ENGLAND	0098-3004	1873-7803		COMPUT GEOSCI-UK	Comput. Geosci.	JUL	2015	80
J	Miller, K				Miller, Kate			Public Engagement and Social Science.	JOURNAL OF SOCIAL POLICY			English	Book Review									[Miller, Kate] Univ Bristol, Bristol BS8 1TH, Avon, England	Miller, K (reprint author), Univ Bristol, Bristol BS8 1TH, Avon, England.	kate.miller@bristol.ac.uk					Burawoy M, 2004, SOC FORCES, V82, P1603, DOI 10.1353/sof.2004.0064; Maile S, 2014, PUBLIC ENGAGEMENT AND SOCIAL SCIENCE, P1, DOI 10.1332/policypress/9781447306863.001.0001	2	0	0	3	3	CAMBRIDGE UNIV PRESS	NEW YORK	32 AVENUE OF THE AMERICAS, NEW YORK, NY 10013-2473 USA	0047-2794	1469-7823		J SOC POLICY	J. Soc. Policy	JUL	2015	44	3
J	Vasileiadou, E				Vasileiadou, Eleftheria			Crowd science: It is not just a matter of time (or funding)	JOURNAL OF THE ASSOCIATION FOR INFORMATION SCIENCE AND TECHNOLOGY			English	Editorial Material						user studies; scholarly communication; technology impact	CITIZEN-SCIENCE; CONSERVATION	Citizen science, or crowd science, or volunteer science, has increased in the last 4-5 years, with an accompanying increase in the literature. The main argument in such literature is that citizen science has many advantages, not only for scientists and the science that is produced, but also for the participating citizens. As a result of this line of reasoning, the main issue becomes: How we can f…	Eindhoven Univ Technol, Sch Innovat Sci, NL-5612 AZ Eindhoven, Netherlands	Vasileiadou, E (reprint author), Eindhoven Univ Technol, Sch Innovat Sci, Den Dolech 2, NL-5612 AZ Eindhoven, Netherlands.	e.vasileiadou@tue.nl					Delaney DG, 2008, BIOL INVASIONS, V10, P117, DOI 10.1007/s10530-007-9114-0; Vaughan L, 2003, J AM SOC INF SCI TEC, V54, P29, DOI 10.1002/asi.10184; Trumbull DJ, 2000, SCI EDUC, V84, P265, DOI 10.1002/(SICI)1098-237X(200003)84:2<265::AID-SCE7>3.0.CO;2-5; Cornwell ML, 2012, SOC STUD SCI, V42, P101, DOI 10.1177/0306312711430440; Ottinger G, 2010, SCI TECHNOL HUM VAL, V35, P244, DOI 10.1177/016224390…	20	0	0	17	17	WILEY-BLACKWELL	HOBOKEN	111 RIVER ST, HOBOKEN 07030-5774, NJ USA	2330-1635	2330-1643		J ASSOC INF SCI TECH		JUL	2015	66	7
[truncated: 1,746 more rows]
[truncated: 12 more columns]

## Sheet: 2. Source Data Search string
SEARCH DATE 2015-12-15
(TS="citizen science" NOT UT=(000357981200028 OR 000356699600007 OR 000357755500011 OR 000357416600005 OR 000356368400014 OR 000356718500002 OR 000355124800008 OR 000350559900015 OR 000357516600005 OR 000347418200011 OR 000346408100011 OR 000345090000007 OR 000345206000018 OR 000338182000019 OR 000335537400025 OR 000336874100012 OR 000335010400004 OR 000334147900012 OR 000331650600002 OR 00033061…
OR
[truncated: 40 more rows]

## Sheet: 3. Original search string
Search string TS searches: TOTAL: 1281 on 20151013
[truncated: 30 more rows]

## Sheet: 4. Keywords
Original Search		Snowball 1, 2015-12-15		Snowball 2, 2015-12-15		Snowball 3, 2015-12-15
[truncated: 163 more rows]

[truncated: 8 more sheets: 5. Recursive Search String 1, 6 Recursive Search Source 1, 7. Recursive Search String 2, 8. Recursive Search Source 2, 9. Recursive Search String 3, 10. Recursive Search Source 3, 11. Bibliography, N=1935, 12. Table 1]
