# Supplementary material for: What Is Citizen Science? – A Scientometric Meta-Analysis
Source: PLoS One. 2016 Jan 14;11(1):e0147152. doi: 10.1371/journal.pone.0147152 (PMC4713078; doi:10.1371/journal.pone.0147152)
Supplement: S2 Appendix — (XLSX) [file pone.0147152.s002.xlsx]

## Sheet: Figure
Search Conducted 2015-10-16	Note: The sum of the individual searches are greater than the total search string in Appendix 1 because some records mention more than one project, for example Galaxy Zoo and Planet Hunters.
Total 633 Recs
The number of Articles per project are calculated with the Python3 script in the "Extraction Script" sheet applied to the Source Data. To replicate this procedure, please follow the script comments.
NAME	Articles
North American Breeding Bird Survey	178
Galaxy Zoo	88
Common Birds Census	48
Cooperative Observer Program	34
Ebird	32
Nest Record Scheme	20
FoldIT	20
Wetland Bird Survey	17
Genographic Project	16
Planet Hunters	14
Globe at Night	13
Chicago Wilderness	11
North American Amphibian Monitoring Program	9
Evolution Megalab	7
Phytoplankton Monitoring Network	6
NestWatch	6
Milky Way Project	6
Audubon Christmas Bird Count	6
Astronomers without borders	5
Open Air Laboratories	4
HawkWatch	4
Florida LAKEWATCH	4
Public Lab	3
Neighborhood nestwatch	3
Moon Zoo	3
Michigan Sea Grant	3
Garden BirdWatch	3
FrogWatch	3
Feeder watch	3
Cybertracker	3
Bird Source	3
Wider Countryside Butterfly Survey	2
Road Watch in the Pass	2
Plants of Concern	2
North American Bird Phenology Program	2
North American Bird Phenology Program	2
Monarch Larva Monitoring Project	2
Monarch Larva Monitoring Project	2
Manta Matcher	2
Invaders of Texas	2
House Finch Disease Survey	2
Galileoscope Project	2
BirdTrack	2
Alabama Water Watch	2
Yard Map	1
Whale FM	1
School of Ants	1
Redmap	1
Patients Like Me	1
Orchive	1
OPAL Soil and Earthworm Survey	1
OakMapper	1
Notes from nature	1
Notes From Nature	1
Nature's Notebook	1
Nature's Notebook	1
Nature's calendar	1
Moths Count	1
Monarch Watch	1
Maine Audubon Wildlife Road Watch	1
Lost Ladybug	1
Juvenile Lobster Monitoring Program	1
iNaturalist	1
Great Sunflower Project	1
Great Pollinator Project	1
Great Backyard Bird count	1
Explore the Seafloor	1
Citizen Sparrow	1
Cell Slider	1
CamClickr	1
California Roadkill Observation System	1
Birds in Forested Landscapes	1
Big Sleep Survey	1
Big Garden Birdwatch	1
Barcoding Life's Matrix	1
Avian Knowledge Network	1
Astrosphere New Media Association	1
Agent Exoplanet	1
Yellow hammers	0
WV Save Our Streams Program	0
Worm Watch	0
World Water Monitoring Challenge	0
Woodland Pool Project	0
Wisconsin Stream Monitoring	0
Wisconsin NatureMapping	0
Wisconsin Citizen Lake Monitoring	0
Wisconsin Acoustic Bat Monitoring	0
Winter Wild Turkey Flock Survey	0
wildwhales.org	0
WildMe	0
wildlifelog.org	0
Wildlife Watch	0
wildlife of your home project	0
Wildlife Health Event Reporter	0
Wild River State Park Prairie Care	0
Who's Whoo-ing: Study Suburban Owls	0
White Squirrel Mapping	0
What's Invasive	0
What lives on Albany Hill Cerrito Creek	0
What lives in the El Cerrito Hillside NAtural Area	0
Whales & Glaciers Citizen Science Adventure	0
Western Maritime Bryophytes	0
Western Gray Squirrel Project	0
Westchester Citizens Volunteer Monitoring Program	0
West Virginia Breeding Bird Atlas II	0
West Maui Mountains Watershed Partnership	0
Weather Detective	0
Water Action Volunteers Citizen Stream Monitoring	0
Watch the Wild	0
Watch for Robins!	0
Waquoit Bay National Estuarine Research Reserve Waquoit Bay Baywatchers	0
Volunteer Field Observer	0
Vital Signs: Maine's invasive species	0
Vesta Mappers	0
Vermont Center for Ecostudies	0
Verb Corner	0
Vanessa Migration Project	0
URI Watershed Watch	0
Urban Watch Program, First Flush Event (Dry season storm drain monitoring)	0
Urban Tree Survey	0
Urban Coyote Project	0
Upper Merrimack Monitoring Program	0
Upper Etowah Adopt-A-Stream	0
Upper Chattahoochee Riverkeeper	0
United Kingdom Butterfly Monitoring Scheme	0
Turtle Sat	0
TreeWatch	0
Tracking the Wild Invasives	0
Track a Tree	0
Texas Turtle Watch	0
Superior Lakewatch	0
Summit County Citizen Science Inventory	0
Summer Wild Turkey Sighting Survey	0
Streamkeepers of Clallam County	0
STE - Scuba Tourism for the Environment - Red Sea Monitoring Program	0
Staunton River Watch	0
Stardust at Home	0
Stanford Bioblitz 2011	0
St. Louis River Watch	0
Spotted Wing DrosophilaVolunteer Monitoring Network	0
Space Wraps	0
South Branch Watershed Association Biological Monitoring Program	0
South Asian Bat Monitoring Program	0
South American Wildlands and Biodiversity	0
South American Anoles	0
Sound Check Australia	0
Solar Storm Watch	0
Socientize	0
snowcore.waterloo.ca	0
Snapshot Serengeti	0
Slime Moulds of the World	0
Sky Island Alliance: Wildlife linkages program	0
Sky Island Alliance: Riparian Inventory and Monitoring Program	0
Shermans Creek Watershed Monitoring Program	0
Shark Population Monitoring in South CaroliNA	0
Shark Observation Network	0
Seward Park Phenology	0
Seward Park Eagle and Raptor DNA Fingerprinting	0
Seward Park Coyote Tracking	0
Seti Live	0
Secchi App	0
Seabird Ecological Assessment Network (SEANET)	0
Sea Floor Explorer	0
SCORE - SC Oyster Restoration and Enhancement	0
Science Cheerleaders	0
Schweizerische Vogelwarte (CH)	0
Scenic Hudson: Volunteer Herring and Eel Monitoring	0
San Francisco Community Gardens	0
San Francisco Bay Area Network Weed Watchers	0
San Diego CoastKeeper	0
Salt Marsh Program	0
Rothamsted Insect Survey Light-Trap Network	0
Rockland County Volunteer Stream Monitoring Program	0
Roadkill Project	0
Riverways Programs	0
River Source Watershed Monitoring	0
Rhode Island Chapter Blue Water Task Force	0
Reef volunteer fish survey	0
REEF – Reef Environmental Education Foundation	0
Redwood Watch	0
Rare Plant Monitoring in the Golden Gate National Parks	0
Raptors of Costa Rica	0
Raptor Population Index	0
Radio Galaxy Zoo	0
Puget Sound NAturalists	0
Project Squirrel	0
Project Splatter	0
Project Pigeon Watch	0
Project MonarchHealth	0
Project Butterfly WINGS	0
Project BudBurst	0
PRIDE - Santa Ynez River Estuary Shorebird Monitoring	0
Plankton Portal	0
Pigeon Watch	0
Phylo DNA Puzzle	0
Photographic Survey of Flower Visitors	0
PhillyTreeMap	0
Peruvian Birds Project	0
Pepperwood Vital Signs	0
Penn State Astrobiology Citizen Science Project	0
Patuxent River Water Quality Initiative	0
Passaic River Environmental Education and Monitoring Organization	0
PasadeNA Area Biodiversity	0
Pacific Flyway Shorebird Survey (PFSS)	0
Osprey NestWatch - Volunteer Monitoring Program	0
Osa Nature Counts	0
OPIHI: Our Project In Hawaii's Intertidal	0
Operation Spider	0
Operation RubyThroat: The Hummingbird Project	0
Operation Magpie	0
Operation Bluetongue	0
Open Dino	0
OPAL Bugs Count	0
OPAL Biodiversity Survey	0
Ontario Insects	0
Oklahoma Invasive Plant Council	0
Ohop Wildlife Monitoring Project	0
Ohio Odonata Society Dragonfly Monitoring	0
Ohio Lepidopterists: Long-term Monitoring of Butterflies	0
Ohio Department of natural Resources Division of Soil & Water Conservation	0
Ohio Bioblitz	0
Noxious Weeds Citizen Science Project	0
Northumberland Count Forest	0
North Carolina Sea Turtle Project	0
North and South Rivers Watershed Association, Inc.	0
Noe Conservation	0
Nisqually BMA Bioblitz	0
New York Horseshoe Crab Monitoring Network	0
New Jersey Audubon Shorebird Survey	0
New Jersey Audubon Heron Survey	0
New Jersey Audubon Grassland Bird Survey	0
New Hampshire Volunteer Marsh Monitors	0
New Hampshire Turkey Observers	0
Nest Box Challenge	0
Neotropical Grasshoppers and Katydids	0
NatureWatch.org.nz	0
naturewatch.ca	0
Naturewatch (CA)	0
Nature's Calendar Survey	0
MySwan	0
Mykoweb	0
My Invasive	0
Mussel Monitoring Program of Wisconsin	0
Mushroom Observer	0
Mushroom Observer	0
Museum of Discovery and Science: Sea Turtle Research	0
Mountain Watch: Flower Monitoring	0
Mountain Watch: Adopt-A-Peak	0
Mountain Birdwatch	0
Morro Bay Volunteer Monitoring Program - Plankton Pullers:	0
Monarch Parasites	0
Mitten CrabWATCH	0
MIT Sea Grant Coastal Resources	0
Missouri Reptiles	0
Missouri Amphibians	0
Minnesota Zebra Mussel Detection Program; Citizen Watch	0
Minnesota Odonata Survey Project	0
Minnesota Loon Monitoring Program	0
Minnesota Frog and Toad Calling Survey	0
MigrantWatch: Tracking Bird Migration Across India	0
Middlebury Area Land Trust Biodiversity Survey	0
Michigan Cooperative Lakes Monitoring Program	0
Miami Valley Stream Team	0
Metropolitan Council Citizen-Assisted Monitoring Program (CAMP)	0
Mercury Mappers	0
Maumee Remedial Action Plan; Maumee Bay Watershed Project	0
Mastodon Matrix Project	0
Massachusetts Audubon Whip-poor-will Project	0
Massachusetts Audubon Owls Project	0
Massachusetts Audubon Oriole Project	0
Massachusetts Audubon American Kestrel Monitoring Project	0
Mark West Watershed Biodiversity Project	0
Marine Resources Council of East Florida	0
Marine Megafauna Foundation	0
Mapping Washington Wildlands	0
Manomet Center for Conservation Sciences Wetland Watchers	0
Maine Volunteer Lake Monitors	0
Maine Owl Monitoring Program	0
Maine Amphibian Monitoring Program	0
Macroinvertebrates of Lobos Creek	0
Lower Nehalem Watershed Monitoring Project	0
Louisiana Bucket Brigade	0
Loudoun Stream Monitoring	0
Loudoun county bird atlas	0
Loudoun Bluebird Nestbox Monitoring	0
Loudoun Amphibian Monitoring Program	0
Logbook Transcription Project	0
Linking landscapes of Massachusetts Wildlife: Turtle Roadkill study	0
Linking landscapes of Massachusetts Wildlife: Statewide Roadkill Database	0
Linking landscapes of Massachusetts Wildlife: Amphibian Roadway Crossing Database	0
LiMPETS: Sandy Beach Monitoring Program	0
LiMPETS: Rocky Intertidal Monitoring Program	0
Lakes of Missouri Volunteer Program	0
Lake Serene Lake Monitor	0
Lake Lanier Citizen's Monitoring Program	0
Konza Environmental Education Program: Prarie Phenology	0
Kitsap County Surface and Storm Water Management Program Stream Team (Now the Stream Stewards Program)	0
kinseyreporter.org	0
Kentucky Water Watch Program	0
Kalatope Khajjar Biodiversity Project Part 2 Butterflies	0
Kalatope Khajjar Biodiversity Project Part 1 Moths	0
Juniper Pollen Project	0
Jug Bay Volunteer Program	0
Journey North's Spring Monarch Butterfly Migration Monitoring	0
Jellywatch	0
Jay Watch: Monitoring Florida's Only Endemic Bird	0
Jasper Ridge Monitoring Project	0
iSeahorse.org	0
IOWATER, Iowa's Volunteer Water Quality Monitoring	0
Internet Artizans	0
International Sea Turtle Observation Registry (iSTOR)	0
Inland Sea Society	0
iNaturalist.org Global Amphibian Blitz	0
iNaturalist.org	0
Illinois RiverWatch Network - Stream Sampling	0
Illinois RiverWatch Citizen Scientist Program	0
Illinois Butterfly Monitoring Network	0
IDAH2O Master Water Stewards	0
IceWatch USA	0
I-90 Wildlife Watch	0
Hummingbirds at Home	0
Hummingbird Migration Tracker	0
Hudson River Eel Project	0
Huckleberry Botanic Preseve Monitoring	0
Hoosier Riverwatch	0
Hong Kong Moths	0
Hillsborough County Stormwater Public Education Awareness Campaign (SPEAC)	0
High Country Citizen Science Project	0
Herpetogasy Bioblitz	0
Herpatologicl education and research project NAHERP	0
Herbarium at home	0
Hazelnut project	0
Hawaii Sea Turtle Monitoring	0
Grunion Greeters	0
Green Seattle Partnership Forest Monitoring Team	0
Greater Gallatin Watershed Council - Stream Team Program	0
Great Sun Flower	0
Great Lakes Worm Watch	0
Great Bay Coast Watch	0
Great Basin National Park Birds EOL Collection	0
Great Annual Fish Count	0
Goravan State Natura Reservation Biodiversity Project	0
Golded Frog Project	0
Global Reptile Bioblitz	0
Global Garlic Mustard Field Survey	0
Georgia Adopt-A-Stream	0
gardenwildlifehealth.org	0
Fulton County Adopt-A-Stream	0
Frog watch USA	0
Frog Listening Network	0
Friends of the Jordan River Watershed	0
Fresno Bird Count	0
Fountain Creek Water Sentinels (part of Sierra Club Water Sentinels)	0
Forest Salamander Monitoring	0
Forest Breeding Bird Monitoring	0
Fontenelle Forest Biodiversity	0
Flying Ant Survey	0
Florida LAKEWATCH: Aquatic Bird Survey	0
Florida Butterfly Monitoring Network	0
Flint Creek Water shed	0
Firefly Watch	0
Firefly watch	0
Fall Long-billed Curlew Surveys in CA's Central Valley	0
Fairfax County Volunteer Stream Monitoring	0
eyewire.org	0
Exotic Species Sighting Program	0
EterRNA	0
Environment and Natural Resources Institute (ENRI)	0
ECOCEAN-whale shark Photo ID library	0
Earthplace	0
Earthdive	0
Earth Observatory NASA	0
Early Detection & Distribution Mapping System	0
e-butterfly.org	0
Dragonfly Swarm Project	0
Dragonfly Monitoring Network	0
Delaware Riverkeeper Network	0
Dark Skies, Bright Kids	0
CSMON-LIFE	0
Crowd Crafting	0
Crowd Computing for Chemoinformatics	0
Cricket Crawl	0
Craywatch	0
Cosmo Quest	0
Cornell Citizen Science Tool Kit	0
Cook Inletkeeper	0
Contra Costa Volunteer Creek Monitoring	0
Connect 2 Decode	0
CONE-Welder	0
Condor Watch	0
Community Science Institute	0
Community Clean Water Institute	0
Community Aquatic Monitoring Program (CAMP)	0
Common Loon Citizen Science Project	0
Columbia River Gorge Watch: Nature Notes	0
Columbia River Gorge Watch-Science in Action: Habitat Assessment	0
Columbia River Gorge Watch-Science in Action: Dam Removal Restoration	0
Columbia River Gorge Watch-Science in Action: Bioblitz	0
Colorado Spider Survey	0
ColonyWatch: Monitoring Colorado Waterbirds	0
Colonial Waterbird Surveys	0
Cobb County Adopt-A-Stream	0
Coastal Breeding Bird Monitoring	0
Coalition for Buzzards Bay	0
Cloned Plants Project	0
Clark County Volunteer Monitoring Program	0
Citizens Statewide Lake Assessment Program (CSLAP)	0
Citizen Sense	0
Citizen Science Central	0
Citizen Monitoring of Wisconsin’s Freshwater Sponges	0
Citizen Monitoring of Wadeable Streams and Rivers	0
Citizen Lake Awareness and Monitoring (CLAM)	0
Cicindela Tiger Beetles	0
Chicago Park District Butterfly Monitoring Program	0
Chesterfield County Stream Watcher	0
Chesapeake Bay SAV Hunt	0
Central Wisconsin Riverkeepers	0
Central texas Biodiversity Study	0
CelebrateUrbanBirds.org	0
Celebrate Urban Birds	0
Cascades Butterfly Project	0
Cape Cod Osprey Project	0
Cape Cod EOL Collection	0
Canadian Wildlife Health Cooperative	0
Camas Citizen Science Monitoring Program	0
California NatureMapping	0
California Academy of Sciences: Living Roof Project	0
Ca Newt Watch	0
Butterflies and Moths of North America	0
Bumble Bee Watch	0
BugGuide.net	0
budburst.org	0
Brooklyn Atlantis	0
Brodhead Watershed Association; Citizen Streamwatch Program	0
British Columbia Butterfly Atlas	0
Brazos Basin Volunteer Citizens' Monitoring Program	0
Bosque Ecosystem Monitoring Program (BEMP)	0
Boise Watershed Watch	0
Black Hills Bee Project	0
Birdsleuth	0
Birds of Theodore Roosevelt Island Washington DC EOL Collection	0
Bird Ringing at the British Trust for Ornithology	0
Bird Atlas 2007-11: Mapping Britain and Ireland's Birds	0
Biodiversity of the Cache River Watershed	0
BioBlitz! Oklahoma	0
BioBlitz: National Geographic	0
Bioblitz of Shelby Forest	0
Bioblitz at Don Edward San Francisco Bay NWR	0
Bioblitz 2011 Saguaro National Park Arizona	0
Big Fork River Board, Citizens Advisory Group	0
BeeSpotter	0
BeeSpotter	0
Bee Hunt	0
Beaver Creek Reserve BioBlitzes (3 different properties)	0
Bay Area’s Most Wanted Spider	0
Bay Area Ant Survey	0
Bat Monitoring Project	0
Bat Detective	0
Bald Eagle Watch	0
Badgermap	0
Audubon of Florida EagleWatch	0
Atlas for the Persian Toad Headed Agama	0
Ashland University Plants of North Central Ohio	0
artsobservasjoner.no	0
Artportalen	0
Armenian Citizen Herpetologists	0
Arkansas Stream Team	0
Arizona Odonates	0
Aquatic Invasive Species Monitoring	0
Aqua-Lab Project of the Okaloosa County Environmental Council	0
Appalachian Trail Citizen Science Project	0
Anza Borrego Desert Wildlife	0
Annual Midwest Crane Count	0
Annual Loudoun Butterfly Count	0
Anne Arundel County Citizen Monitoring Program	0
Annapolis River Guardians	0
Animals in Urbania	0
Amphibians and Reptils of Colombia	0
Amphibian World of Bangladesh	0
American Pika Atlas	0
American Oystercatcher Banding	0
American Kestrel Partnership	0
Alliance for the Chesapeake Bay (Rivertrends)	0
Air Quality Egg Project	0
AgeGuess	0
Adopt-a-Stream Mississippi	0
Adopt-a-Shoreline Program, Invasive plant monitoring	0
Adopt-a-Lake	0
Adirondack All-Taxa Biodiversity Inventory	0
Addison County River Watch Collaborative	0
Adams County Lake and Stream Monitoring	0

## Sheet: Source Data
VR	PT	AU	AF	TI	SO	LA	DT	DE	ID	AB	C1	RP	EM	CR	NR	TC	Z9	U1	U2	PU	PI	PA	SN	EI	J9	JI	PD	PY	VL	BP	EP	DI	PG	WC	SC	GA	UT		FU	FX	IS	AR	PM	OI	RI	SI	BE	SE	BN
	J	Rossiter, DG|Liu, J|Carlisle, S|Zhu, AX	Rossiter, David G.|Liu, Jing|Carlisle, Steve|Zhu, A. -Xing	Can citizen science assist digital soil mapping?	GEODERMA	English	Article	Predictive soil mapping; Unsystematic observations; Opportunistic sampling; Quality assurance	CLASSIFICATION TREES; MANAGEMENT; KNOWLEDGE; INFORMATION; VARIABILITY; VALIDATION; NETWORK; SCALE; MAPS; USA	The essential element of citizen science is the participation of non-specialists in scientific research. The citizen acts as an observer or experimenter within structures established by a project run by professional scientists. The recent explosion in projects is due to the development of enabling technology, exemplified by the spatially-enabled "smart" phone with mapping applications and its sup…	[Rossiter, David G.] Cornell Univ, Dept Crop & Soil Sci, Ithaca, NY 14850 USA.|[Rossiter, David G.] Chinese Acad Sci, Nanjing Soil Sci Inst, Nanjing 210008, Jiangsu, Peoples R China.|[Liu, Jing; Zhu, A. -Xing] Univ Wisconsin, Dept Geog, Madison, WI 53706 USA.|[Zhu, A. -Xing] Nanjing Normal Univ, Sch Geog, Nanjing 210023, Jiangsu, Peoples R China.	Rossiter, DG (reprint author), Cornell Univ, Dept Crop & Soil Sci, Ithaca, NY 14850 USA.	dgr2@comell.edu; jliu93@wisc.edu; soilscientist1@gmail.com; azhu@wisc.edu	Agriculture and Agri-Food Canada, 2013, CAN SOIL INF SERV|Conrad CC, 2011, ENVIRON MONIT ASSESS, V176, P273, DOI 10.1007/s10661-010-1582-5|Sullivan BL, 2009, BIOL CONSERV, V142, P2282, DOI 10.1016/j.biocon.2009.05.006|[Anonymous], 2015, NAT SOIL INF SYST NA|ORESKES N, 1994, SCIENCE, V263, P641, DOI 10.1126/science.263.5147.641|Arrouays D, 2014, ADV AGRON, V125, P93, DOI 10.1016/B978-0-12-800137-0…	47	1	1	19	19	ELSEVIER SCIENCE BV	AMSTERDAM	PO BOX 211, 1000 AE AMSTERDAM, NETHERLANDS	0016-7061	1872-6259	GEODERMA	Geoderma	DEC	2015	259	71	80	10.1016/j.geoderma.2015.05.006	10	Soil Science	Agriculture	CQ8OM	WOS:000360867800008
	J	Wood, EM|Pidgeon, AM|Radeloff, VC|Helmers, DP|Culbert, PD|Keuler, NS|Flather, CH	Wood, Eric M.|Pidgeon, Anna M.|Radeloff, Volker C.|Helmers, David P.|Culbert, Patrick D.|Keuler, Nicholas S.|Flather, Curtis H.	Long-term avian community response to housing development at the boundary of US protected areas: effect size increases with time	JOURNAL OF APPLIED ECOLOGY	English	Article	avian abundance; avian richness; Breeding Bird Survey; inholding; private land; public land; species of greatest conservation need; synanthrope	CONSERVATION DEVELOPMENT; UNITED-STATES; LAND-USE; EXURBAN DEVELOPMENT; HUMAN-POPULATION; BIODIVERSITY; PATTERNS; BIRDS; FRAGMENTATION; URBANIZATION	Biodiversity conservation is a primary function of protected areas. However, protected areas also attract people, and therefore, land use has intensified at the boundaries of these lands globally. In the USA, since the 1970s, housing growth at the boundaries (<1km) of protected areas has increased at a rate far higher than on more distant private lands. Here, we designed our analyses to address o…	[Wood, Eric M.; Pidgeon, Anna M.; Radeloff, Volker C.; Helmers, David P.; Culbert, Patrick D.] Univ Wisconsin, Dept Forest & Wildlife Ecol, Madison, WI 53706 USA.|[Wood, Eric M.] Cornell Univ, Cornell Lab Ornithol, Ithaca, NY 14850 USA.|[Keuler, Nicholas S.] Univ Wisconsin, Dept Stat, Madison, WI 53706 USA.|[Flather, Curtis H.] US Forest Serv, Rocky Mt Res Stn, USDA, Ft Collins, CO 80526 USA.	Wood, EM (reprint author), Univ Wisconsin, Dept Forest & Wildlife Ecol, 1630 Linden Dr, Madison, WI 53706 USA.	ericmwood@gmail.com	Cincotta RP, 2000, NATURE, V404, P990, DOI 10.1038/35010105|DeFries R, 2005, ECOL APPL, V15, P19, DOI 10.1890/03-5258|Homer C, 2004, PHOTOGRAMM ENG REM S, V70, P829|Laurance WF, 2012, NATURE, V489, P290, DOI 10.1038/nature11318|McKinney ML, 2002, BIOSCIENCE, V52, P883, DOI 10.1641/0006-3568(2002)052[0883:UBAC]2.0.CO;2|Rissman AR, 2007, CONSERV BIOL, V21, P709, DOI 10.1111/j.1523-1739.2007.00660.x…	48	0	0	4	4	WILEY-BLACKWELL	HOBOKEN	111 RIVER ST, HOBOKEN 07030-5774, NJ USA	0021-8901	1365-2664	J APPL ECOL	J. Appl. Ecol.	OCT	2015	52	1227	1236	10.1111/1365-2664.12492	10	Ecology	Environmental Sciences & Ecology	CR2UP	WOS:000361186500013		US Forest Service Rocky Mountain Research Station; NASA Biodiversity Program	We gratefully acknowledge support for this research by the US Forest Service Rocky Mountain Research Station, and the NASA Biodiversity Program. We thank the volunteers who have collected BBS and housing census data, which have made this study possible. We thank M. Whittingham, R. Fuller and two anonymous reviewers for their very helpful comments to improve our manuscript. All authors declare no …	5
	J	Porter, AT|Holan, SH|Wikle, CK	Porter, Aaron T.|Holan, Scott H.|Wikle, Christopher K.	Bayesian semiparametric hierarchical empirical likelihood spatial models	JOURNAL OF STATISTICAL PLANNING AND INFERENCE	English	Article	Conditional autoregressive model; Fay-Herriot model; Kriging; Random field; Small area estimation	CONFIDENCE-INTERVALS; GENERALIZED-METHOD; ESTIMATORS; REGRESSION; POSTERIOR; MOMENTS; POINT	We introduce a general hierarchical Bayesian framework that incorporates a flexible nonparametric data model specification through the use of empirical likelihood methodology, which we term semiparametric hierarchical empirical likelihood (SHEL) models. Although general dependence structures can be readily accommodated, we focus on spatial modeling, a relatively underdeveloped area in the empiric…	[Porter, Aaron T.] Colorado Sch Mines, Dept Appl Math & Stat, Golden, CO 80401 USA.|[Holan, Scott H.; Wikle, Christopher K.] Univ Missouri, Dept Stat, Columbia, MO 65211 USA.	Porter, AT (reprint author), Colorado Sch Mines, Dept Appl Math & Stat, 1500 Illinois St, Golden, CO 80401 USA.	aporter@mines.edu	FAY RE, 1979, J AM STAT ASSOC, V74, P269|ZELLNER A, 1986, J AM STAT ASSOC, V81, P446, DOI 10.2307/2289234|Newey WK, 2004, ECONOMETRICA, V72, P219, DOI 10.1111/j.1468-0262.2004.00482.x|Bandyopadhyay S., 2014, ANN STAT, V43, P519|Berliner L, 1996, MAXIMUM ENTROPY BAYE, V79, P15|BESAG J, 1991, ANN I STAT MATH, V43, P1, DOI 10.1007/BF00116466|Chang IH, 2008, BIOMETRIKA, V95, P139, DOI 10.1093/biomet/…	40	0	0	9	9	ELSEVIER SCIENCE BV	AMSTERDAM	PO BOX 211, 1000 AE AMSTERDAM, NETHERLANDS	0378-3758	1873-1171	J STAT PLAN INFER	J. Stat. Plan. Infer.	OCT	2015	165	78	90	10.1016/j.jspi.2015.04.002	13	Statistics & Probability	Mathematics	CL2BQ	WOS:000356749000007		U.S. National Science Foundation (NSF); U.S. Census Bureau under NSF grant through the NSF-Census Research Network (NCRN) program [SES-1132031]	This research was partially supported by the U.S. National Science Foundation (NSF) and the U.S. Census Bureau under NSF grant SES-1132031, funded through the NSF-Census Research Network (NCRN) program. We thank an anonymous referee for providing valuable comments that have helped strengthen this manuscript.
	J	Langham, GM|Schuetz, JG|Distler, T|Soykan, CU|Wilsey, C	Langham, Gary M.|Schuetz, Justin G.|Distler, Trisha|Soykan, Candan U.|Wilsey, Chad	Conservation Status of North American Birds in the Face of Future Climate Change	PLOS ONE	English	Article		RANGE SHIFTS; MODELS; DISTRIBUTIONS; COUNT	Human-induced climate change is increasingly recognized as a fundamental driver of biological processes and patterns. Historic climate change is known to have caused shifts in the geographic ranges of many taxa and future climate change is expected to result in even greater redistributions of species. As a result, predicting the impact of climate change on future patterns of biodiversity will gre…	[Langham, Gary M.] Natl Audubon Soc, Washington, DC 20036 USA.|[Schuetz, Justin G.; Distler, Trisha; Soykan, Candan U.; Wilsey, Chad] Natl Audubon Soc, San Francisco, CA USA.	Langham, GM (reprint author), Natl Audubon Soc, Washington, DC 20036 USA.	climatescience@audubon.org	Dormann CF, 2013, ECOGRAPHY, V36, P27, DOI 10.1111/j.1600-0587.2012.07348.x|Warren R, 2013, NAT CLIM CHANGE, V3, P678, DOI [10.1038/nclimate1887, 10.1038/NCLIMATE1887]|Freeman EA, 2008, ECOL MODEL, V217, P48, DOI 10.1016/j.ecolmodel.2008.05.015|AraÃºjo Miguel B, 2007, Trends Ecol Evol, V22, P42|Brown JH, 1996, ANNU REV ECOL SYST, V27, P597, DOI 10.1146/annurev.ecolsys.27.1.597|Thomas CD, 2004, NA…	53	0	0	23	23	PUBLIC LIBRARY SCIENCE	SAN FRANCISCO	1160 BATTERY STREET, STE 100, SAN FRANCISCO, CA 94111 USA	1932-6203		PLOS ONE	PLoS One	2015-09-02	2015	10			10.1371/journal.pone.0135350	16	Multidisciplinary Sciences	Science & Technology - Other Topics	CQ4ZT	WOS:000360613800029		U.S. Fish and Wildlife Service [F11AP00380/912001-9700]	This work was supported by the U.S. Fish and Wildlife Service (contract #F11AP00380/912001-9700) to GML. The funders had no role in study design, data collection and analysis, decision to publish, or preparation of the manuscript.	9	e0135350	26333202
	J	La Sorte, FA|Hochachka, WM|Farnsworth, A|Sheldon, D|Fink, D|Geevarghese, J|Winner, K|Van Doren, BM|Kelling, S	La Sorte, Frank A.|Hochachka, Wesley M.|Farnsworth, Andrew|Sheldon, Daniel|Fink, Daniel|Geevarghese, Jeffrey|Winner, Kevin|Van Doren, Benjamin M.|Kelling, Steve	Migration timing and its determinants for nocturnal migratory birds during autumn migration	JOURNAL OF ANIMAL ECOLOGY	English	Article	body size; dietary guild; eBird; ecological productivity; migration distance; migration timing; optimal migration theory; seasonal bird migration; weather surveillance radar; wind	NORTHEASTERN NORTH-AMERICA; LONG-DISTANCE MIGRANTS; CLIMATE-CHANGE; ARCTIC AMPLIFICATION; PASSERINE MIGRANTS; SEA-ICE; WIND; VEGETATION; WEATHER; ARRIVAL	Migration is a common strategy used by birds that breed in seasonal environments, and multiple environmental and biological factors determine the timing of migration. How these factors operate in combination during autumn migration, which is considered to be under weaker time constraints relative to spring migration, is not clear. Here, we examine the patterns and determinants of migration timing…	[La Sorte, Frank A.; Hochachka, Wesley M.; Farnsworth, Andrew; Fink, Daniel; Van Doren, Benjamin M.; Kelling, Steve] Cornell Univ, Cornell Lab Ornithol, Ithaca, NY 14850 USA.|[Sheldon, Daniel; Geevarghese, Jeffrey; Winner, Kevin] Univ Massachusetts, Sch Comp Sci, Amherst, MA 01003 USA.|[Sheldon, Daniel] Mt Holyoke Coll, Dept Comp Sci, S Hadley, MA 01075 USA.	La Sorte, FA (reprint author), Cornell Univ, Cornell Lab Ornithol, Ithaca, NY 14850 USA.	fal42@cornell.edu	ABLE KP, 1973, ECOLOGY, V54, P1031, DOI 10.2307/1935569|Alerstam T., 1990, P331|Alerstam T., 1990, BIRD MIGRATION|Hedenstrom A, 2008, PHILOS T R SOC B, V363, P287, DOI 10.1098/rstb.2007.2140|Francis JA, 2012, GEOPHYS RES LETT, V39, DOI 10.1029/2012GL051000|Barnes EA, 2013, GEOPHYS RES LETT, V40, P4734, DOI 10.1002/grl.50880|Kemp MU, 2013, IBIS, V155, P734, DOI 10.1111/ibi.12064|Chapman BB, 2011, …	77	0	0	22	22	WILEY-BLACKWELL	HOBOKEN	111 RIVER ST, HOBOKEN 07030-5774, NJ USA	0021-8790	1365-2656	J ANIM ECOL	J. Anim. Ecol.	SEP	2015	84	1202	1212	10.1111/1365-2656.12376	11	Ecology; Zoology	Environmental Sciences & Ecology; Zoology	CP7UG	WOS:000360093400007		Leon Levy Foundation; Wolf Creek Foundation; National Science Foundation [IIS-1125098, IIS-1017793]	We thank K. Webb for assistance with data acquisition and preparation; A. Johnston for valuable discussions; F. Liechti, J. Shamoun-Baranes and an anonymous reviewer for constructive comments; the eBird team for their support; and the eBird participants for their contributions. This work was funded by the Leon Levy Foundation, Wolf Creek Foundation and the National Science Foundation (IIS-1125098…	5		25850460
	J	Zimmerman, GS|Sauer, JR|Fleming, K|Link, WA|Garrettson, PR	Zimmerman, Guthrie S.|Sauer, John R.|Fleming, Kathy|Link, William A.|Garrettson, Pamela R.	Combining Waterfowl and Breeding Bird Survey Data to Estimate Wood Duck Breeding Population Size in the Atlantic Flyway	JOURNAL OF WILDLIFE MANAGEMENT	English	Article	Atlantic Flyway Breeding Waterfowl Survey; Bayesian methods; breeding population; hierarchical models; North American Breeding Bird Survey; wood duck	EASTERN NORTH-AMERICA; ABUNDANCE; STATES	We combined data from the Atlantic Flyway Breeding Waterfowl Survey (AFBWS) and the North American Breeding Bird Survey (BBS) to estimate the number of wood ducks (Aix sponsa) in the United States portion of the Atlantic Flyway from 1993 to 2013. The AFBWS is a plot-based survey that covers most of the northern and central portions of the Flyway; when analyzed with adjustments for survey time of …	[Zimmerman, Guthrie S.] US Fish & Wildlife Serv, Div Migratory Bird Management, Sacramento, CA 95819 USA.|[Sauer, John R.; Link, William A.] US Geol Survey, Patuxent Wildlife Res Ctr, Laurel, MD 20708 USA.|[Fleming, Kathy; Garrettson, Pamela R.] US Fish & Wildlife Serv, Div Migratory Bird Management, Laurel, MD 20708 USA.	Zimmerman, GS (reprint author), US Fish & Wildlife Serv, Div Migratory Bird Management, 3020 State Univ Dr East,Modoc Hall,Suite 2007, Sacramento, CA 95819 USA.	guthrie_zimmerman@fws.gov	Alisauskas RT, 2009, ENVIRON ECOL STAT SE, V3, P463, DOI 10.1007/978-0-387-78151-8_20|Alisauskas RT, 2014, ECOL EVOL, V4, P132, DOI 10.1002/ece3.906|Lunn DJ, 2000, STAT COMPUT, V10, P325, DOI 10.1023/A:1008929526011|Sauer JR, 2003, J WILDLIFE MANAGE, V67, P372, DOI 10.2307/3802778|Bellrose F. C., 1980, DUCKS GEESE SWANS N|Bowers E.F., 1975, Transactions N Am Wildl nat Resour Conf, VNo. 40, P300|B…	31	0	0	13	13	WILEY-BLACKWELL	HOBOKEN	111 RIVER ST, HOBOKEN 07030-5774, NJ USA	0022-541X	1937-2817	J WILDLIFE MANAGE	J. Wildl. Manage.	SEP	2015	79	1051	1061	10.1002/jwmg.938	11	Ecology; Zoology	Environmental Sciences & Ecology; Zoology	CP8QL	WOS:000360159100003				7
	J	White, RL|Sutton, AE|Salguero-Gomez, R|Bray, TC|Campbell, H|Cieraad, E|Geekiyanage, N|Gherardi, L|Hughes, AC|Jorgensen, PS|Poisot, T|DeSoto, L|Zimmerman, N	White, Rachel L.|Sutton, Alexandra E.|Salguero-Gomez, Roberto|Bray, Timothy C.|Campbell, Heather|Cieraad, Ellen|Geekiyanage, Nalaka|Gherardi, Laureano|Hughes, Alice C.|Jorgensen, Peter Sogaard|Poisot, Timothee|DeSoto, Lucia|Zimmerman, Naupaka	The next generation of action ecology: novel approaches towards global ecological research	ECOSPHERE	English	Article	action ecology; applied ecology; big data; citizen science; environmental leadership; environmental management; ESA Centennial Paper; planetary stewardship; training; transdisciplinary; translational ecology	OPEN-ACCESS; CITIZEN SCIENCE; DATA-MANAGEMENT; BIG DATA; CONSERVATION; PUBLICATION; CHALLENGES; SYSTEMS; TOOL; OPPORTUNITIES	Advances in the acquisition and dissemination of knowledge over the last decade have dramatically reshaped the way that ecological research is conducted. The advent of large, technology-based resources such as iNaturalist, Genbank, or the Global Biodiversity Information Facility (GBIF) allow ecologists to work at spatio-temporal scales previously unimaginable. This has generated a new approach in…	[White, Rachel L.; Sutton, Alexandra E.; Salguero-Gomez, Roberto; Bray, Timothy C.; Campbell, Heather; Cieraad, Ellen; Geekiyanage, Nalaka; Gherardi, Laureano; Hughes, Alice C.; Jorgensen, Peter Sogaard; Poisot, Timothee; DeSoto, Lucia; Zimmerman, Naupaka] Univ Brighton, Int Network Next Generat Ecologists, Brighton BN2 4GJ, E Sussex, England.|[White, Rachel L.] Univ Brighton, Biol & Biomed Sci D…	White, RL (reprint author), Univ Brighton, Int Network Next Generat Ecologists, Brighton BN2 4GJ, E Sussex, England.	r.white2@brighton.ac.uk	Aarssen L. W., 2012, IDEAS ECOLOGY EVOLUT, V5, P9|Aarssen L. W., 2008, IDEAS ECOLOGY EVOLUT, V1, P1, DOI 10.4033/iee.2008.1.1.e|Adams WM, 2004, SCIENCE, V306, P1146, DOI 10.1126/science.1097920|African Development Bank Group, 2013, OP DAT AFR|Alberts B, 2008, SCIENCE, V321, P15, DOI 10.1126/science.1162115|Allen EE, 2005, NAT REV MICROBIOL, V3, P489, DOI 10.1038/nrmicro1157|Michener WK, 2006, ECO…	106	0	0	30	30	ECOLOGICAL SOC AMER	WASHINGTON	1990 M STREET NW, STE 700, WASHINGTON, DC 20036 USA	2150-8925		ECOSPHERE	Ecosphere	AUG	2015	6			10.1890/ES14-00485.1	16	Ecology	Environmental Sciences & Ecology	CP1ON	WOS:000359645200006				8	134
	J	Forcey, GM|Thogmartin, WE|Linz, GM|Mckann, PC|Crimmins, SM	Forcey, Greg M.|Thogmartin, Wayne E.|Linz, George M.|Mckann, Patrick C.|Crimmins, Shawn M.	Spatially explicit modeling of blackbird abundance in the Prairie Pothole Region	JOURNAL OF WILDLIFE MANAGEMENT	English	Article	bayesian; blackbirds; climate; crop damage; hierarchical models; landscape; MCMC; North American Breeding Bird Survey; Prairie Pothole Region; relative abundance; weather	BREEDING BIRD SURVEY; RED-WINGED BLACKBIRDS; LAND-COVER DATA; UNITED-STATES; HIERARCHICAL ANALYSIS; CERULEAN WARBLERS; HABITAT SELECTION; AVIAN ABUNDANCE; LANDSCAPE-SCALE; WETLAND BIRDS	Knowledge of factors influencing animal abundance is important to wildlife biologists developing management plans. This is especially true for economically important species such as blackbirds (Icteridae), which cause more than $100 million in crop damages annually in the United States. Using data from the North American Breeding Bird Survey, the National Land Cover Dataset, and the National Clim…	[Forcey, Greg M.] N Dakota State Univ, Dept Biol Sci, Fargo, ND 58105 USA.|[Thogmartin, Wayne E.; Mckann, Patrick C.; Crimmins, Shawn M.] US Geol Survey, Upper Midwest Environm Sci Ctr, La Crosse, WI 54603 USA.|[Linz, George M.] USDA, Natl Wildlife Res Ctr, Bismarck, ND 58501 USA.	Forcey, GM (reprint author), Normandeau Associates, 102 NE 10th Ave, Gainesville, FL 32601 USA.	research@gregforcey.com	Akinremi OO, 1999, J CLIMATE, V12, P2996, DOI 10.1175/1520-0442(1999)012<2996:PTOTCP>2.0.CO;2|Anderson J. R., 1976, 964 US DEP INT GEOL|Spiegelhalter DJ, 2002, J ROY STAT SOC B, V64, P583, DOI 10.1111/1467-9868.00353|Brooks SP, 1998, J COMPUT GRAPH STAT, V7, P434, DOI 10.2307/1390675|Holland JD, 2004, BIOSCIENCE, V54, P227, DOI 10.1641/0006-3568(2004)054[0227:DTSSOS]2.0.CO;2|Millett B, 2009, CLIM…	73	0	0	6	6	WILEY-BLACKWELL	HOBOKEN	111 RIVER ST, HOBOKEN 07030-5774, NJ USA	0022-541X	1937-2817	J WILDLIFE MANAGE	J. Wildl. Manage.	AUG	2015	79	1022	1033	10.1002/jwmg.912	12	Ecology; Zoology	Environmental Sciences & Ecology; Zoology	CN1JX	WOS:000358177000017		National Wildlife Research Center, a unit within the United States Department of Agriculture, Animal Plant and Health Inspection Service, Wildlife Services (WS); Department of Biological Sciences and the Graduate School at North Dakota State University; [WS-NWRCQA-1039]	We thank W. J. Bleier, M. E. Biondini, G. K. Clambey, and G. L. Nuechterlein for their contributions and advice on this study. D. Anderson, D. Granfors, R. Johnson, N. Niemuth, and J. Sauer provided suggestions on the data analyses for this project. We also thank E. O'Neal for providing ArcGIS plugins to simplify the spatial analyses of weather and land use data. M. R. Sones provided copy-editing…	6
	J	Veloz, S|Salas, L|Altman, B|Alexander, J|Jongsomjit, D|Elliott, N|Ballard, G	Veloz, Samuel|Salas, Leonardo|Altman, Bob|Alexander, John|Jongsomjit, Dennis|Elliott, Nathan|Ballard, Grant	Improving effectiveness of systematic conservation planning with density data	CONSERVATION BIOLOGY	English	Article	conservation prioritization; species distribution models; species diversity; systematic conservation planning; zonation; diversidad de especies; modelos de distribucion de especies; planeacion sistematica de la conservacion; priorizacion de la conservacion; zonacion	SPECIES DISTRIBUTION MODELS; DATA-INTENSIVE SCIENCE; PRESENCE-ABSENCE; CITIZEN SCIENCE; ABUNDANCE; BIODIVERSITY; PREDICTION; PRIORITIZATION; EXPLANATION; GRADIENT	Systematic conservation planning aims to design networks of protected areas that meet conservation goals across large landscapes. The optimal design of these conservation networks is most frequently based on the modeled habitat suitability or probability of occurrence of species, despite evidence that model predictions may not be highly correlated with species density. We hypothesized that conser…	[Veloz, Samuel; Salas, Leonardo; Jongsomjit, Dennis; Elliott, Nathan; Ballard, Grant] Point Blue Conservat Sci, Petaluma, CA 94954 USA.|[Altman, Bob] Amer Bird Conservancy, The Plains, VA 20198 USA.|[Alexander, John] Klamath Bird Observ, Ashland, OR 97520 USA.	Veloz, S (reprint author), Point Blue Conservat Sci, 3820 Cypress Dr 11, Petaluma, CA 94954 USA.	sveloz@pointblue.org	Aarts G, 2012, METHODS ECOL EVOL, V3, P177, DOI 10.1111/j.2041-210X.2011.00141.x|Franklin J, 2010, DIVERS DISTRIB, V16, P321, DOI 10.1111/j.1472-4642.2010.00641.x|Elith J, 2010, METHODS ECOL EVOL, V1, P330, DOI 10.1111/j.2041-210X.2010.00036.x|Elith J, 2009, ECOGRAPHY, V32, P66, DOI 10.1111/j.1600-0587.2008.05505.x|Margules CR, 2000, NATURE, V405, P243, DOI 10.1038/35012251|MacKenzie DI, 2002, EC…	42	0	0	13	13	WILEY-BLACKWELL	HOBOKEN	111 RIVER ST, HOBOKEN 07030-5774, NJ USA	0888-8892	1523-1739	CONSERV BIOL	Conserv. Biol.	AUG	2015	29	1217	1227	10.1111/cobi.12499	11	Biodiversity Conservation; Ecology; Environmental Sciences	Biodiversity & Conservation; Environmental Sciences & Ecology	CM8VT	WOS:000357981200028		North Pacific Landscape Conservation Cooperative	We thank the North Pacific Landscape Conservation Cooperative for funding our work. In addition, we thank the National Park Service, the Oregon Department of Fish and Wildlife, the U.S. Forest Service, the Pacific Southwest Research Station Arcata Laboratory, Portland Audubon, The Nature Conservancy, the U.S. Army Corps of Engineers, the U.S. Geological Survey, the Washington Department of Fish a…	4		25873240
	J	Feldman, RE|Anderson, MG|Howerter, D|Murray, DL	Feldman, Richard E.|Anderson, Michael G.|Howerter, DavidW.|Murray, Dennis L.	Where does environmental stochasticity most influence population dynamics? An assessment along a regional core-periphery gradient for prairie breeding ducks	GLOBAL ECOLOGY AND BIOGEOGRAPHY	English	Article	Abundance; Anas; Aythya; demographic stochasticity; density dependence; environmental stochasticity; Prairie Pothole Region; Ricker model; species ranges; wetlands	DENSITY-DEPENDENCE; SPECIES RANGES; POTHOLE REGION; TIME-SERIES; LAND-USE; CLIMATE; VARIABILITY; ABUNDANCE; DROUGHT; PLAINS	AimGeographical disparities in the effect of the environment on population dynamics have been shown to follow a core-periphery gradient when peripheral populations are less abundant and occur in marginal habitat. Whether the gradient in environmental influence occurs in the absence of a gradient in abundance is not known. We tested whether duck populations on the periphery of their main breeding …	[Feldman, Richard E.; Murray, Dennis L.] Trent Univ, Dept Biol, Peterborough, ON K9J 7B8, Canada.|[Anderson, Michael G.; Howerter, DavidW.] Ducks Unlimited Canada, Inst Wetland & Waterfowl Res, Stonewall, MB R0C 2Z0, Canada.	Feldman, RE (reprint author), Ctr Invest Cient YucatanA C, Unidad Recursos Nat, Calle 43 130 Colonia Chuburna de Hidalgo, Merida 97200, Yucatan, Mexico.	richard.feldman@cicy.mx	Amaral-Turkman MA, 2011, ENVIRON ECOL STAT, V18, P601, DOI 10.1007/s10651-010-0153-9|[Anonymous], 2013, R LANG ENV STAT COMP|Lunn D, 2009, STAT MED, V28, P3049, DOI 10.1002/sim.3680|Murray DL, 2010, ECOLOGY, V91, P571, DOI 10.1890/MS08-1032.1|Viljugrein H, 2005, ECOLOGY, V86, P245, DOI 10.1890/04-0467|Rosseel Y, 2012, J STAT SOFTW, V48, P1|Bahn V, 2006, OIKOS, V115, P89, DOI 10.1111/j.2006.0030-1…	47	0	0	8	8	WILEY-BLACKWELL	HOBOKEN	111 RIVER ST, HOBOKEN 07030-5774, NJ USA	1466-822X	1466-8238	GLOBAL ECOL BIOGEOGR	Glob. Ecol. Biogeogr.	AUG	2015	24	896	904	10.1111/geb.12323	9	Ecology; Geography, Physical	Environmental Sciences & Ecology; Physical Geography	CM7FL	WOS:000357855700003		Canada Research Chairs program; Institute for Wetland and Waterfowl Research, Ducks Unlimited Canada	We thank all of those who have diligently surveyed for ducks and birds as part of the North American Waterfowl Breeding Population and Habitat Survey and the North American Breeding Bird Survey. This research was undertaken, in part, thanks to funding from the Canada Research Chairs program. Additional funding came from the Institute for Wetland and Waterfowl Research, Ducks Unlimited Canada.	8
	J	Schmitt, JR|Wang, J|Fischer, DA|Jek, KJ|Moriarty, JC|Boyajian, TS|Schwamb, ME|Lintott, C|Lynn, S|Smith, AM|Parrish, M|Schawinski, K|Simpson, R|LaCourse, D|Omohundro, MR|Winarski, T|Goodman, SJ|Jebson, T|Schwengeler, HM|Paterson, DA|Sejpka, J|Terentev, I|Jacobs, T|Alsaadi, N|Bailey, RC|Ginman, T|Granado, P|Guttormsen, KV|Mallia, F|Papillon, AL|Rossi, F|Socolovsky, M|Stiak, L	Schmitt, Joseph R.|Wang, Ji|Fischer, Debra A.|Jek, Kian J.|Moriarty, John C.|Boyajian, Tabetha S.|Schwamb, Megan E.|Lintott, Chris|Lynn, Stuart|Smith, Arfon M.|Parrish, Michael|Schawinski, Kevin|Simpson, Robert|LaCourse, Daryll|Omohundro, Mark R.|Winarski, Troy|Goodman, Samuel Jon|Jebson, Tony|Schwengeler, Hans Martin|Paterson, David A.|Sejpka, Johann|Terentev, Ivan|Jacobs, Tom|Alsaadi, Nawar|Bai…	PLANET HUNTERS. VI. AN INDEPENDENT CHARACTERIZATION OF KOI-351 AND SEVERAL LONG PERIOD PLANET CANDIDATES FROM THE KEPLER ARCHIVAL DATA (vol 148, 28, 2014)	ASTRONOMICAL JOURNAL	English	Correction				[Schmitt, Joseph R.; Wang, Ji; Fischer, Debra A.; Moriarty, John C.; Boyajian, Tabetha S.] Yale Univ, Dept Astron, New Haven, CT 06511 USA.|[Schwamb, Megan E.] Natl Taiwan Univ, Acad Sinica, Inst Astron & Astrophys, Taipei 10617, Taiwan.|[Lintott, Chris; Simpson, Robert] Oxford Astrophys, Oxford OX1 3RH, England.|[Lintott, Chris; Lynn, Stuart; Smith, Arfon M.; Parrish, Michael] Adler Planetarium,…	Schmitt, JR (reprint author), Yale Univ, Dept Astron, New Haven, CT 06511 USA.	joseph.schmitt@yale.edu	Schmitt JR, 2014, ASTRON J, V148, DOI 10.1088/0004-6256/148/2/28	1	0	0	0	0	IOP PUBLISHING LTD	BRISTOL	TEMPLE CIRCUS, TEMPLE WAY, BRISTOL BS1 6BE, ENGLAND	0004-6256	1538-3881	ASTRON J	Astron. J.	JUL	2015	150			10.1088/0004-6256/150/1/38	1	Astronomy & Astrophysics	Astronomy & Astrophysics	CM5QU	WOS:000357744400038				1	38
	J	Christian, C	Christian, Carol	Citizen Science with Hubble Space Telescope Data	COMPUTING IN SCIENCE & ENGINEERING	English	Article	Morphology; Telescopes; Catalogs; Astronomy; Visualization; Probes; History; scientific computing; citizen science; astronomy; science research; outreach	DISK CLUSTER POPULATION; GALAXY ZOO; M31; PHOTOMETRY; POINTINGS; FIELDS	There are many flavors of citizen science today; those involving Hubble Space Telescope data are of the visual classification variety and aimed specifically at producing unique scientific results that would be difficult, if not impossible, to accomplish without large numbers of volunteers.	Space Telescope Sci Inst, Baltimore, MD 21218 USA.	Christian, C (reprint author), Space Telescope Sci Inst, Baltimore, MD 21218 USA.	carolc@stsci.edu	Lintott CJ, 2008, MON NOT R ASTRON SOC, V389, P1179, DOI 10.1111/j.1365-2966.2008.13689.x|Barmby P, 2006, ASTROPHYS J, V650, pL45, DOI 10.1086/508626|Beerman LC, 2012, ASTROPHYS J, V760, DOI 10.1088/0004-637X/760/2/104|Bellazzini M, 2003, ASTRON ASTROPHYS, V405, P867, DOI 10.1051/0004-6361:20030455|Chandar R., 2010, ASTROPHYS J, V719, P966|Christian C., 2012, CITIZEN SCI CONTRIBU, V1, P183|Dalcan…	21	0	0	2	2	IEEE COMPUTER SOC	LOS ALAMITOS	10662 LOS VAQUEROS CIRCLE, PO BOX 3014, LOS ALAMITOS, CA 90720-1314 USA	1521-9615	1558-366X	COMPUT SCI ENG	Comput. Sci. Eng.	JUL-AUG	2015	17	12	19	10.1109/MCSE.2015.42	8	Computer Science, Interdisciplinary Applications	Computer Science	CL4CO	WOS:000356900400003		Space Telescope Science Institute (STScI) under NASA [NAS5-26555]	Support for this work was provided by the Space Telescope Science Institute (STScI), which is operated by the Association of Universities for Research in Astronomy, under NASA contract NAS5-26555. Advice and encouragement on citizen science projects using HST data from the STScI director, Matt Mountain, head of the HST Mission Office at STScI, Ken Sembach, and numerous other individuals is greatl…	4
	J	Belmaker, J|Zarnetske, P|Tuanmu, MN|Zonneveld, S|Record, S|Strecker, A|Beaudrot, L	Belmaker, Jonathan|Zarnetske, Phoebe|Tuanmu, Mao-Ning|Zonneveld, Sara|Record, Sydne|Strecker, Angela|Beaudrot, Lydia	Empirical evidence for the scale dependence of biotic interactions	GLOBAL ECOLOGY AND BIOGEOGRAPHY	English	Article	Biotic interactions; Breeding Bird Survey; co-occurrence; extent; scale; grain; species distribution models	SPECIES DISTRIBUTION MODELS; CLIMATE-CHANGE; DISTRIBUTIONS; ECOLOGY; COMMUNITIES; PREDICTION; DIVERSITY; RICHNESS; WIDE; TIME	AimAlthough it is recognized that ecological patterns are scale dependent, the exact scales over which specific ecological processes operate are still a matter of controversy. In particular, understanding the scales over which biotic interactions operate is critical for predicting changes in species distributions in the face of the ongoing biodiversity crisis. It has been hypothesized that biotic…	[Belmaker, Jonathan] Tel Aviv Univ, Dept Zool, George S Wise Fac Life Sci, IL-69978 Tel Aviv, Israel.|[Zarnetske, Phoebe; Record, Sydne] Michigan State Univ, Dept Forestry & Fisheries & Wildlife, E Lansing, MI 48824 USA.|[Zarnetske, Phoebe; Zonneveld, Sara] Yale Univ, Sch Forestry & Environm Studies, New Haven, CT 06511 USA.|[Tuanmu, Mao-Ning] Yale Univ, Dept Ecol & Evolutionary Biol, New Haven, …	Belmaker, J (reprint author), Tel Aviv Univ, Dept Zool, George S Wise Fac Life Sci, IL-69978 Tel Aviv, Israel.	jbelmaker@post.tau.ac.il	Afkhami ME, 2014, ECOL LETT, V17, P1265, DOI 10.1111/ele.12332|Aitken KEH, 2007, J ORNITHOL, V148, pS425, DOI 10.1007/s10336-007-0166-9|Nakagawa S, 2013, METHODS ECOL EVOL, V4, P133, DOI 10.1111/j.2041-210x.2012.00261.x|Araujo MB, 2014, ECOGRAPHY, V37, P406, DOI 10.1111/j.1600-0587.2013.00643.x|Araujo MB, 2007, GLOBAL ECOL BIOGEOGR, V16, P743, DOI 10.1111/j.1466-8238.2007.00359.x|Guisan A, 2007, …	44	0	0	17	17	WILEY-BLACKWELL	HOBOKEN	111 RIVER ST, HOBOKEN 07030-5774, NJ USA	1466-822X	1466-8238	GLOBAL ECOL BIOGEOGR	Glob. Ecol. Biogeogr.	JUL	2015	24	750	761	10.1111/geb.12311	12	Ecology; Geography, Physical	Environmental Sciences & Ecology; Physical Geography	CJ9PO	WOS:000355834900002		Ecological Society of America; Israel-German Foundation [I-2373-203.13/2014]; Yale Climate and Energy Institute; Michigan State University	We would like to thank the numerous BBS volunteers for the bird distribution data, the Ecological Society of America for sponsoring the 2013 'Scaling-Up: Continental Scale Ecology Workshop for Early Career Scientists', its planning committee, Deborah Goldberg, Matthew Fitzpatrick, Janet Franklin, Robert Guralnick and Katherine Suding, as well as Jill Petraglia Parsons, Clifford Duke and all of th…	7
	J	Bateman, BL|Pidgeon, AM|Radeloff, VC|Allstadt, AJ|Akcakaya, HR|Thogmartin, WE|Vavrus, SJ|Heglund, PJ	Bateman, Brooke L.|Pidgeon, Anna M.|Radeloff, Volker C.|Allstadt, Andrew J.|Akcakaya, H. Resit|Thogmartin, Wayne E.|Vavrus, Stephen J.|Heglund, Patricia J.	The importance of range edges for an irruptive species during extreme weather events	LANDSCAPE ECOLOGY	English	Article	Drought; Extreme weather; Grassland birds; Range edge; Range core; Refuges	DICKCISSELS SPIZA-AMERICANA; CLIMATE-CHANGE EXPERIMENTS; SATELLITE IMAGE TEXTURE; BREEDING BIRD SURVEY; UNITED-STATES; PERIPHERAL-POPULATIONS; GRASSLAND BIRDS; SCALE PATTERNS; CHANGE IMPACTS; DROUGHT	Threats to wildlife species from extreme events, such as droughts, are predicted to increase in frequency and magnitude with climate change. Extreme events can cause mortality and community-level changes, but for some mobile species, movement away from areas affected may be a viable option. We examined the effect of extreme weather on spatial patterns of abundance for an irruptive grassland bird …	[Bateman, Brooke L.; Pidgeon, Anna M.; Radeloff, Volker C.; Allstadt, Andrew J.] Univ Wisconsin, SILVIS Lab, Dept Forest & Wildlife Ecol, Madison, WI 53706 USA.|[Akcakaya, H. Resit] SUNY Stony Brook, Dept Ecol & Evolut, Stony Brook, NY 11794 USA.|[Thogmartin, Wayne E.] US Geol Survey, Upper Midwest Environm Sci Ctr, La Crosse, WI USA.|[Vavrus, Stephen J.] Univ Wisconsin, Ctr Climate Res, Madison,…	Bateman, BL (reprint author), Univ Wisconsin, SILVIS Lab, Dept Forest & Wildlife Ecol, Madison, WI 53706 USA.	brooke.bateman@gmail.com	Albright TP, 2011, REMOTE SENS ENVIRON, V115, P245, DOI 10.1016/j.rse.2010.08.024|Albright TP, 2010, ECOSPHERE, V1|Albright TP, 2010, GLOBAL CHANGE BIOL, V16, P2158, DOI 10.1111/j.1365-2486.2009.02120.x|Anderson BJ, 2009, P R SOC B, V276, P1415, DOI 10.1098/rspb.2008.1681|Rahmstorf S, 2011, P NATL ACAD SCI USA, V108, P17905, DOI 10.1073/pnas.1101766108|Wehner M, 2011, J HYDROMETEOROL, V12, P1359,…	101	0	0	19	19	SPRINGER	DORDRECHT	VAN GODEWIJCKSTRAAT 30, 3311 GZ DORDRECHT, NETHERLANDS	0921-2973	1572-9761	LANDSCAPE ECOL	Landsc. Ecol.	JUL	2015	30	1095	1110	10.1007/s10980-015-0212-6	16	Ecology; Geography, Physical; Geosciences, Multidisciplinary	Environmental Sciences & Ecology; Physical Geography; Geology	CJ7EM	WOS:000355657200010		NASA Biodiversity Program; [NNH10ZDA001N-BIOCLIM]	We thank the NASA Biodiversity Program and the Climate and Biological Response funding opportunity (NNH10ZDA001N-BIOCLIM) for support of this research. We thank P. Culbert for BBS data extraction, and for providing us with landcover and image texture data. We thank R. Behnke for weather data analysis, C. Flather, J. Gorzo, and T. Albright for ideas and discussions which strengthened our analysis,…	6
	J	Fuccillo, KK|Crimmins, TM|de Rivera, CE|Elder, TS	Fuccillo, Kerissa K.|Crimmins, Theresa M.|de Rivera, Catherine E.|Elder, Timothy S.	Assessing accuracy in citizen science-based plant phenology monitoring	INTERNATIONAL JOURNAL OF BIOMETEOROLOGY	English	Article	Citizen science; Data accuracy; Phenology; Protocols; Nature's Notebook; USA National Phenology Network	CLIMATE-CHANGE; VOLUNTEERS; MARINE; RESPONSES; NETWORKS; PROGRAMS; PROJECT; IMPACT; BIAS; TOOL	In the USA, thousands of volunteers are engaged in tracking plant and animal phenology through a variety of citizen science programs for the purpose of amassing spatially and temporally comprehensive datasets useful to scientists and resource managers. The quality of these observations and their suitability for scientific analysis, however, remains largely unevaluated. We aimed to evaluate the ac…	[Fuccillo, Kerissa K.; de Rivera, Catherine E.; Elder, Timothy S.] Portland State Univ, Dept Environm Sci & Management, Portland, OR 97207 USA.|[Crimmins, Theresa M.] Natl Coordinating Off, USA Natl Phenol Network, Tucson, AZ 85721 USA.	Fuccillo, KK (reprint author), Portland State Univ, Dept Environm Sci & Management, Portland, OR 97207 USA.	kerissafuccillo@gmail.com	Cleland EE, 2007, TRENDS ECOL EVOL, V22, P357, DOI 10.1016/j.tree.2007.04.003|Root TL, 2003, NATURE, V421, P57, DOI 10.1038/nature01333|Foster-Smith J, 2003, BIOL CONSERV, V113, P199, DOI 10.1016/S0006-3207(02)00373-7|Memmott J, 2007, ECOL LETT, V10, P710, DOI 10.1111/j.1461-0248.2007.01061.x|Winder M, 2004, ECOLOGY, V85, P2100, DOI 10.1890/04-0151|Walther GR, 2002, NATURE, V416, P389, DOI 10.103…	40	0	0	38	38	SPRINGER	NEW YORK	233 SPRING ST, NEW YORK, NY 10013 USA	0020-7128	1432-1254	INT J BIOMETEOROL	Int. J. Biometeorol.	JUL	2015	59	917	926	10.1007/s00484-014-0892-7	10	Biophysics; Environmental Sciences; Meteorology & Atmospheric Sciences; Physiology	Biophysics; Environmental Sciences & Ecology; Meteorology & Atmospheric Sciences; Physiology	CJ2TH	WOS:000355336900014		NSF [0941763]	Sincere thanks to all contributors to this study including Lori Anne Barnett, Ellen Denny, Alyssa Rosemartin, Jake Weltzin, and USA-NPN National Coordinating Office staff, Dr. Marion Dresner, Dr. Sybil Kelly, Kelly Fisher, Jill Van Winkle, and Rhiannon LeFay from Portland State University, all volunteers from Portland Budwatch (with a special thanks to Harriet Denison and Mark Feldman for their d…	7		25179528
	J	Dieleman, S|Willett, KW|Dambre, J	Dieleman, Sander|Willett, Kyle W.|Dambre, Joni	Rotation-invariant convolutional neural networks for galaxy morphology prediction	MONTHLY NOTICES OF THE ROYAL ASTRONOMICAL SOCIETY	English	Article	methods: data analysis; techniques: image processing; catalogues; galaxies: general	DIGITAL-SKY-SURVEY; ESTIMATING PHOTOMETRIC REDSHIFTS; ZOO; CLASSIFICATION; STAR; RECOGNITION; EXTRACTION; DEPENDENCE; FRACTION; SAMPLE	Measuring the morphological parameters of galaxies is a key requirement for studying their formation and evolution. Surveys such as the Sloan Digital Sky Survey have resulted in the availability of very large collections of images, which have permitted population-wide analyses of galaxy morphology. Morphological analysis has traditionally been carried out mostly via visual inspection by trained e…	[Dieleman, Sander; Dambre, Joni] Univ Ghent, Elect & Informat Syst Dept, B-9000 Ghent, Belgium.|[Willett, Kyle W.] Univ Minnesota, Sch Phys & Astron, Minneapolis, MN 55455 USA.	Dieleman, S (reprint author), Univ Ghent, Elect & Informat Syst Dept, Sint Pietersnieuwstr 41, B-9000 Ghent, Belgium.	sander.dieleman@ugent.be; willett@physics.umn.edu	Orlov N, 2008, PATTERN RECOGN LETT, V29, P1684, DOI 10.1016/j.patrec.2008.04.013|Lintott CJ, 2008, MON NOT R ASTRON SOC, V389, P1179, DOI 10.1111/j.1365-2966.2008.13689.x|Lintott C, 2011, MON NOT R ASTRON SOC, V410, P166, DOI 10.1111/j.1365-2966.2010.17432.x|FUKUSHIMA K, 1980, BIOL CYBERN, V36, P193, DOI 10.1007/BF00344251|York DG, 2000, ASTRON J, V120, P1579, DOI 10.1086/301513|Lecun Y, 1998, P …	65	1	1	3	3	OXFORD UNIV PRESS	OXFORD	GREAT CLARENDON ST, OXFORD OX2 6DP, ENGLAND	0035-8711	1365-2966	MON NOT R ASTRON SOC	Mon. Not. Roy. Astron. Soc.	2015-06-21	2015	450	1441	1459	10.1093/mnras/stv632	19	Astronomy & Astrophysics	Astronomy & Astrophysics	CK6LB	WOS:000356338500023		Winton Capital; UMN; Alfred P. Sloan Foundation; National Science Foundation; U.S. Department of Energy; National Aeronautics and Space Administration; Japanese Monbukagakusho; Max Planck Society; Higher Education Funding Council for England; American Museum of Natural History; Astrophysical Institute Potsdam; University of Basel; University of Cambridge; Case Western Reserve University; Universi…	We would like to thank Pieter-Jan Kindermans, Francis wyffels, Aaron van den Oord, Pieter Buteneers, Chris Lintott, Philip Marshall and the anonymous reviewer for their valuable feedback. We would like to acknowledge Joyce Noah-Vanhoucke, Chris Lintott, David Harvey, Thomas Kitching and Philip Marshall for their help in designing the Kaggle Galaxy Challenge. We thank Winton Capital for their fina…	2
	J	Smethurst, RJ|Lintott, CJ|Simmons, BD|Schawinski, K|Marshall, PJ|Bamford, S|Fortson, L|Kaviraj, S|Masters, KL|Melvin, T|Nichol, RC|Skibba, RA|Willett, KW	Smethurst, R. J.|Lintott, C. J.|Simmons, B. D.|Schawinski, K.|Marshall, P. J.|Bamford, S.|Fortson, L.|Kaviraj, S.|Masters, K. L.|Melvin, T.|Nichol, R. C.|Skibba, R. A.|Willett, K. W.	Galaxy Zoo: evidence for diverse star formation histories through the green valley	MONTHLY NOTICES OF THE ROYAL ASTRONOMICAL SOCIETY	English	Article	galaxies: abundances; galaxies: evolution; galaxies: general; galaxies: photometry; galaxies: statistics	DIGITAL-SKY-SURVEY; COLOR-MAGNITUDE DIAGRAM; STELLAR POPULATION SYNTHESIS; ACTIVE GALACTIC NUCLEI; POST-STARBURST GALAXIES; INITIAL MASS FUNCTION; SURVEY IMAGING DATA; MORPHOLOGICAL CLASSIFICATIONS; PHYSICAL-PROPERTIES; SECULAR EVOLUTION	Does galaxy evolution proceed through the green valley via multiple pathways or as a single population? Motivated by recent results highlighting radically different evolutionary pathways between early-and late-type galaxies, we present results from a simple Bayesian approach to this problem wherein we model the star formation history (SFH) of a galaxy with two parameters, [t, tau] and compare the…	[Smethurst, R. J.; Lintott, C. J.; Simmons, B. D.; Marshall, P. J.] Univ Oxford, Dept Phys, Oxford Astrophys, Oxford OX1 3RH, England.|[Schawinski, K.] ETH, Dept Phys, Inst Astron, CH-8093 Zurich, Switzerland.|[Marshall, P. J.] Stanford Univ, Kavli Inst Particle Astrophys & Cosmol, Stanford, CA 95616 USA.|[Bamford, S.] Univ Nottingham, Sch Phys & Astron, Nottingham NG7 2RD, England.|[Fortson, L.;…	Smethurst, RJ (reprint author), Univ Oxford, Dept Phys, Oxford Astrophys, Denys Wilkinson Bldg,Keble Rd, Oxford OX1 3RH, England.	rebecca.smethurst@astro.ox.ac.uk	Aihara H, 2011, ASTROPHYS J SUPPL S, V193, DOI 10.1088/0067-0049/193/2/29|Noeske KG, 2007, ASTROPHYS J, V660, pL43, DOI 10.1086/517926|Daddi E, 2007, ASTROPHYS J, V670, P156, DOI 10.1086/521818|Bruzual G, 2003, MON NOT R ASTRON SOC, V344, P1000, DOI 10.1046/j.1365-8711.2003.06897.x|Lintott CJ, 2008, MON NOT R ASTRON SOC, V389, P1179, DOI 10.1111/j.1365-2966.2008.13689.x|Strateva I, 2001, ASTRON J…	113	1	1	0	0	OXFORD UNIV PRESS	OXFORD	GREAT CLARENDON ST, OXFORD OX2 6DP, ENGLAND	0035-8711	1365-2966	MON NOT R ASTRON SOC	Mon. Not. Roy. Astron. Soc.	2015-06-11	2015	450	435	453	10.1093/mnras/stv161	19	Astronomy & Astrophysics	Astronomy & Astrophysics	CK6BA	WOS:000356311600032		Science and Technology Facilities Council Grant [ST/K502236/1, ST/J500665/1]; Oxford Martin School; Worcester College; Balliol College, Oxford; Swiss National Science Foundation [PP00P2_138979/1]; Leverhulme Trust; University of Minnesota; Alfred P. Sloan Foundation; NASA [NAS5-98034]; National Science Foundation; US Department of Energy; National Aeronautics and Space Administration; Japanese Mo…	RS acknowledges funding from the Science and Technology Facilities Council Grant Code ST/K502236/1. BDS gratefully acknowledges support from the Oxford Martin School, Worcester College and Balliol College, Oxford. KS gratefully acknowledges support from Swiss National Science Foundation Grant PP00P2_138979/1. KLM acknowledges funding from The Leverhulme Trust as a 2010 Early Career Fellow. TM ack…	1			Bamford, Steven/0000-0001-7821-7195
	J	Hobson, KA|Van Wilgenburg, SL|Dunn, EH|Hussell, DJT|Taylor, PD|Collister, DM	Hobson, Keith A.|Van Wilgenburg, Steve L.|Dunn, Erica H.|Hussell, David J. T.|Taylor, Philip D.|Collister, Douglas M.	Predicting origins of passerines migrating through Canadian migration monitoring stations using stable-hydrogen isotope analyses of feathers: a new tool for bird conservation	AVIAN CONSERVATION AND ECOLOGY	English	Article	catchment areas; CMMN; feathers; migration monitoring; population trends; stable isotopes	POPULATION DECLINES; WINTERING GROUNDS; LESSER SCAUP; LONG-TERM; DELTA-D; CONNECTIVITY; DISPERSAL; SONGBIRD; FOREST; PRECIPITATION	The Canadian Migration Monitoring Network (CMMN) consists of standardized observation and migration count stations located largely along Canada's southern border. A major purpose of CMMN is to detect population trends of migratory passerines that breed primarily in the boreal forest and are otherwise poorly monitored by the North American Breeding Bird Survey (BBS). A primary limitation of this a…	[Hobson, Keith A.] Environm Canada, Sci & Technol Branch, Saskatoon, SK S7N 0H3, Canada.|[Van Wilgenburg, Steve L.] Canadian Wildlife Serv, Gatineau, PQ, Canada.|[Hobson, Keith A.; Dunn, Erica H.] Environm Canada, Saskatoon, SK S7N 0H3, Canada.|[Hussell, David J. T.] Ontario Minist Nat Resources, Cochrane, ON, Canada.|[Taylor, Philip D.] Acadia Univ, Wolfville, NS B0P 1X0, Canada.	Hobson, KA (reprint author), Environm Canada, 11 Innovat Blvd, Saskatoon, SK S7N 0H3, Canada.	keith.hobson@ec.gc.ca	Voigt CC, 2012, BIOL CONSERV, V153, P80, DOI 10.1016/j.biocon.2012.04.027|Faaborg J, 2010, ECOL APPL, V20, P398, DOI 10.1890/09-0397.1|BENJAMINI Y, 1995, J ROY STAT SOC B MET, V57, P289|Phillips SJ, 2006, ECOL MODEL, V190, P231, DOI 10.1016/j.ecolmodel.2005.03.026|Bates D, 2014, LME4 LINEAR MIXED EF|Bayne EM, 2005, LANDSCAPE ECOL, V20, P203, DOI 10.1007/s10980-004-2265-9|BirdLife International an…	61	0	0	13	13	RESILIENCE ALLIANCE	WOLFVILLE	ACADIA UNIV, BIOLOGY DEPT, WOLFVILLE, NS B0P 1X0, CANADA	1712-6568		AVIAN CONSERV ECOL	Avian Conserv. Ecol.	JUN	2015	10			10.5751/ACE-00719-100103	50	Biodiversity Conservation; Ecology; Ornithology	Biodiversity & Conservation; Environmental Sciences & Ecology; Zoology	CM3ZA	WOS:000357622700003		U.S. Fish and Wildlife Service Neotropical Migratory Bird Conservation Act; Environment Canada; Ontario Ministry of Natural Resources; Bird Studies Canada; Calgary Bird Banding Society; Alberta Gaming and Liquor Commission biennial casino; CMMN stations	We thank the numerous individuals who collected feathers at the following Canadian Migration Monitoring Network (CMMN) stations: Albert Creek Bird Observatory, Atlantic Bird Observatory, Ausable Bird Observatory, Beaverhill Bird Observatory, Bruce Peninsula Bird Observatory, Delta Marsh Bird Observatory, Haldimand Bird Observatory, Inglewood Bird Sanctuary, Innis Point Bird Observatory, Last Moun…	1	3
	J	Evans, BS|Ryder, TB|Reitsma, R|Hurlbert, AH|Marra, PP	Evans, Brian S.|Ryder, Thomas B.|Reitsma, Robert|Hurlbert, Allen H.|Marra, Peter P.	Characterizing avian survival along a rural-to-urban land use gradient	ECOLOGY	English	Article	avian demography; birds; citizen science; land use gradients; mark-recapture; Neighborhood Nestwatch; resource availability; survival; top-down vs. bottom-up processes; urbanization; Washington, DC, USA	ADULT SEX-RATIOS; URBANIZATION GRADIENT; ECOLOGICAL TRAPS; NESTING BIRDS; UNITED-STATES; LANDSCAPE; HABITAT; POPULATIONS; SURVIVORSHIP; PRODUCTIVITY	Many avian species persist in human-dominated landscapes; however, little is known about the demographic consequences of urbanization in these populations. Given that urban habitats introduce novel benefits (e.g., anthropogenic resources) and pressures (e.g., mortality risks), conflicting mechanisms have been hypothesized to drive the dynamics of urban bird populations. Top-down processes such as…	[Evans, Brian S.; Hurlbert, Allen H.] Univ N Carolina, Curriculum Environm & Ecol, Chapel Hill, NC 27599 USA.|[Evans, Brian S.; Ryder, Thomas B.; Reitsma, Robert; Marra, Peter P.] Natl Zool Pk, Smithsonian Conservat Biol Inst, Migratory Bird Ctr, Washington, DC 20013 USA.|[Hurlbert, Allen H.] Univ N Carolina, Dept Biol, Chapel Hill, NC 27599 USA.	Evans, BS (reprint author), Univ N Carolina, Curriculum Environm & Ecol, Chapel Hill, NC 27599 USA.	bsevans.unc@gmail.com	Akaike H, 1973, 2 INT S INF THEOR, P267|Amrhein V, 2012, METHODS ECOL EVOL, V3, P713, DOI 10.1111/j.2041-210X.2012.00207.x|McKinney ML, 1999, TRENDS ECOL EVOL, V14, P450, DOI 10.1016/S0169-5347(99)01679-1|Crooks KR, 1999, NATURE, V400, P563, DOI 10.1038/23028|Robb GN, 2008, FRONT ECOL ENVIRON, V6, P476, DOI 10.1890/060152|Alig RJ, 2004, LANDSCAPE URBAN PLAN, V69, P219, DOI 10.1016/j.landurbplan.2…	62	0	0	54	54	ECOLOGICAL SOC AMER	WASHINGTON	1990 M STREET NW, STE 700, WASHINGTON, DC 20036 USA	0012-9658	1939-9170	ECOLOGY	Ecology	JUN	2015	96	1631	1640	10.1890/14-0171.1	10	Ecology	Environmental Sciences & Ecology	CK2DV	WOS:000356021700018		Mills Corporation; Wallace Genetic Foundation; Susan and Frank Mars; Youth Access Grants; National Science Foundation [ESI-0540185]	The Mills Corporation, Wallace Genetic Foundation, Susan and Frank Mars, Youth Access Grants, and the National Science Foundation (ESI-0540185) provided financial support for this study. We are grateful for the many talented field assistants for their contributions over the course of this project, as well as S. Cole, N. Diggs, A. M. Kilpatrick, and K. Sullivan for their invaluable training and su…	6
	J	Hostetler, JA|Chandler, RB	Hostetler, Jeffrey A.|Chandler, Richard B.	Improved state-space models for inference about spatial and temporal variation in abundance from count data	ECOLOGY	English	Article	abundance; Dail and Madsen model; density dependence; detectability; Gompertz model; immigration; North American Breeding Bird Survey; population dynamics; Ricker model; state-space model; zero-inflated distribution	BREEDING BIRD SURVEY; POPULATION-DYNAMICS; DENSITY-DEPENDENCE; METAPOPULATION DYNAMICS; BIOLOGICAL POPULATIONS; HIERARCHICAL-MODELS; SAMPLING-VARIANCE; OBSERVATION ERROR; PROCESS NOISE; POINT COUNTS	Models of population dynamics are frequently used for purposes such as testing hypotheses about density dependence and predicting species' responses to future environmental change or conservation actions. Fitting models of population dynamics to field data is challenging because most data sets are characterized by observation error, which can inflate estimates of process variation if ignored. Rec…	[Hostetler, Jeffrey A.] Natl Zool Pk, Migratory Bird Ctr, Smithsonian Conservat Biol Inst, Washington, DC 20013 USA.|[Chandler, Richard B.] USGS Patuxent Wildlife Res Ctr, Laurel, MD 20708 USA.	Hostetler, JA (reprint author), Fish & Wildlife Res Inst, Florida Fish & Wildlife Conservat Commiss, St Petersburg, FL 33701 USA.	jeffrey.hostetler@myfwc.com	Bjornstad ON, 2001, SCIENCE, V293, P638, DOI 10.1126/science.1062226|Miller DA, 2011, ECOLOGY, V92, P1422, DOI 10.1890/10-1396.1|Hanski I, 1998, NATURE, V396, P41, DOI 10.1038/23876|Hatfield JS, 2012, CONSERV BIOL, V26, P667, DOI 10.1111/j.1523-1739.2012.01853.x|Dennis B, 2006, ECOL MONOGR, V76, P323, DOI 10.1890/0012-9615(2006)76[323:EDDPNA]2.0.CO;2|Bjornstad ON, 2000, J ANIM ECOL, V69, P869, DO…	49	0	0	31	31	ECOLOGICAL SOC AMER	WASHINGTON	1990 M STREET NW, STE 700, WASHINGTON, DC 20036 USA	0012-9658	1939-9170	ECOLOGY	Ecology	JUN	2015	96	1713	1723	10.1890/14-1487.1	11	Ecology	Environmental Sciences & Ecology	CK2DV	WOS:000356021700026		U.S. National Park Service; Smithsonian Institution; USGS's Breeding Bird Survey program	We thank J. Andrew Royle, T. Scott Sillett, and John Sauer for helpful suggestions on our analysis. We gratefully acknowledge the U.S. National Park Service, the Smithsonian Institution, and USGS's Breeding Bird Survey program for funding support. We thank Keith Pardieck and David Ziolkowski for help with data acquisition. We are grateful for the numerous helpful suggestions for manuscript revisi…	6				Hostetler, Jeffrey/A-3345-2011
	J	Willett, KW|Schawinski, K|Simmons, BD|Masters, KL|Skibba, RA|Kaviraj, S|Melvin, T|Wong, OI|Nichol, RC|Cheung, E|Lintott, CJ|Fortson, L	Willett, Kyle W.|Schawinski, Kevin|Simmons, Brooke D.|Masters, Karen L.|Skibba, Ramin A.|Kaviraj, Sugata|Melvin, Thomas|Wong, O. Ivy|Nichol, Robert C.|Cheung, Edmond|Lintott, Chris J.|Fortson, Lucy	Galaxy Zoo: the dependence of the star formation-stellar mass relation on spiral disc morphology	MONTHLY NOTICES OF THE ROYAL ASTRONOMICAL SOCIETY	English	Article	galaxies: spiral; galaxies: star formation	DIGITAL-SKY-SURVEY; FORMATION RATES; PHYSICAL-PROPERTIES; FORMING GALAXIES; MERGING GALAXIES; DATA RELEASE; EVOLUTION; SEQUENCE; GAS; RED	We measure the stellar mass-star formation rate (SFR) relation in star-forming disc galaxies at z <= 0.085, using Galaxy Zoo morphologies to examine different populations of spirals as classified by their kiloparsec-scale structure. We examine the number of spiral arms, their relative pitch angle, and the presence of a galactic bar in the disc, and show that both the slope and dispersion of the M…	[Willett, Kyle W.; Fortson, Lucy] Univ Minnesota, Sch Phys & Astron, Minneapolis, MN 55455 USA.|[Schawinski, Kevin] ETH, Inst Astron, Dept Phys, CH-8093 Zurich, Switzerland.|[Simmons, Brooke D.; Kaviraj, Sugata; Lintott, Chris J.] Oxford Astrophys, Oxford OX1 3RH, England.|[Masters, Karen L.; Melvin, Thomas; Nichol, Robert C.] Univ Portsmouth, Inst Cosmol & Gravitat, Portsmouth PO1 3FX, Hants, En…	Willett, KW (reprint author), Univ Minnesota, Sch Phys & Astron, 116 Church St SE, Minneapolis, MN 55455 USA.	willett@physics.umn.edu	Abazajian KN, 2009, ASTROPHYS J SUPPL S, V182, P543, DOI 10.1088/0067-0049/182/2/543|Abramson LE, 2014, ASTROPHYS J LETT, V785, DOI 10.1088/2041-8205/785/2/L36|Kauffmann G, 2003, MON NOT R ASTRON SOC, V346, P1055, DOI 10.1111/j.1365-2966.2003.07154.x|Hopkins PF, 2008, ASTROPHYS J SUPPL S, V175, P356, DOI 10.1086/524362|Noeske KG, 2007, ASTROPHYS J, V660, pL43, DOI 10.1086/517926|Daddi E, 2007, AS…	57	1	1	0	0	OXFORD UNIV PRESS	OXFORD	GREAT CLARENDON ST, OXFORD OX2 6DP, ENGLAND	0035-8711	1365-2966	MON NOT R ASTRON SOC	Mon. Not. Roy. Astron. Soc.	MAY 1	2015	449	820	827	10.1093/mnras/stv307	8	Astronomy & Astrophysics	Astronomy & Astrophysics	CJ2WO	WOS:000355345600060		Leverhulme Trust; US National Science Foundation [DRL-0941610]; Swiss National Science Foundation [PP00P2_138979/1]; Alfred P. Sloan Foundation; National Science Foundation; US Department of Energy; National Aeronautics and Space Administration; Japanese Monbukagakusho; Max Planck Society; Higher Education Funding Council for England; American Museum of Natural History; Astrophysical Institute Po…	We thank Rory Smith, Lucio Mayer, and Bruce Elmegreen for useful discussions. This research made use of TOPCAT, an interactive graphical viewer and editor for tabular data (Taylor 2005) and Astropy, a community-developed core PYTHON package for astronomy (Astropy Collaboration et al. 2013). The development of GZ2 was supported by The Leverhulme Trust. KWW and LFF are supported by the US National …	1
	J	Barnagaud, JY|Papaix, J|Gimenez, O|Svenning, JC	Barnagaud, Jean-Yves|Papaix, Julien|Gimenez, Olivier|Svenning, Jens-Christian	Dynamic spatial interactions between the native invader Brown-headed Cowbird and its hosts	DIVERSITY AND DISTRIBUTIONS	English	Article	Biotic interactions; bird communities; dispersal; landscape fragmentation; Molothrus ater; parasitism	GENERALIST BROOD PARASITE; EASTERN NORTH-AMERICA; RAIN-FOREST BIRD; MOLOTHRUS-ATER; BIOTIC INTERACTIONS; NEST PREDATION; COMMUNITY; PATTERNS; DISTRIBUTIONS; CONSEQUENCES	AimWe investigated the contribution of parasitism by the Brown-headed Cowbird (Molothrus ater) to its host population dynamics at a subcontinental scale. We predicted that the growth rate of cowbirds would be most strongly related to the abundance of forest insectivorous hosts and that landscape fragmentation would have opposite effects on the parasite and its hosts. Furthermore, due to the speci…	[Barnagaud, Jean-Yves; Svenning, Jens-Christian] Aarhus Univ, Sect Ecoinformat & Biodivers, Dept Biosci, DK-8000 Aarhus C, Denmark.|[Barnagaud, Jean-Yves] INRA, UMR BIOGECO 1202, F-33612 Cestas, France.|[Barnagaud, Jean-Yves] Univ Bordeaux, UMR BIOGECO 1202, F-33400 Talence, France.|[Papaix, Julien] INRA BIOGER, F-78850 Thiverval Grignon, France.|[Papaix, Julien] INRA MIAJ, Domaine Vilvert, F-783…	Barnagaud, JY (reprint author), Aarhus Univ, Sect Ecoinformat & Biodivers, Dept Biosci, Ny Munkegade 114, DK-8000 Aarhus C, Denmark.	jeanyves.barnagaud@gmail.com	Anderson KE, 2012, AUK, V129, P307, DOI 10.1525/auk.2012.11164|Hartway C, 2012, CONSERV BIOL, V26, P657, DOI 10.1111/j.1523-1739.2012.01883.x|Araujo MB, 2007, GLOBAL ECOL BIOGEOGR, V16, P743, DOI 10.1111/j.1466-8238.2007.00359.x|Chase JM, 2011, PHILOS T R SOC B, V366, P2351, DOI 10.1098/rstb.2011.0063|Ricklefs RE, 2008, AM NAT, V172, P741, DOI 10.1086/593002|Hovick TJ, 2013, LANDSCAPE ECOL, V28, …	54	0	0	18	18	WILEY-BLACKWELL	HOBOKEN	111 RIVER ST, HOBOKEN 07030-5774, NJ USA	1366-9516	1472-4642	DIVERS DISTRIB	Divers. Distrib.	MAY	2015	21	511	522	10.1111/ddi.12275	12	Biodiversity Conservation; Ecology	Biodiversity & Conservation; Environmental Sciences & Ecology	CF5GV	WOS:000352586400003		Aarhus University Research Foundation under the AU Ideas programme; French National Institute for Agricultural Research (INRA); Aquitaine Regional Council	This study is a contribution by the Center for Informatics Research on Complexity in Ecology (CIRCE), funded by the Aarhus University Research Foundation under the AU Ideas programme. J-Y. B. was partly funded by the French National Institute for Agricultural Research (INRA) and the Aquitaine Regional Council. We sincerely thank Patuxent Wildlife Research Center for granting public access to the …	5			Svenning, Jens-Christian/0000-0002-3415-0862	Svenning, Jens-Christian/C-8977-2012
	J	Distler, T|Schuetz, JG|Velasquez-Tibata, J|Langham, GM	Distler, Trisha|Schuetz, Justin G.|Velasquez-Tibata, Jorge|Langham, Gary M.	Stacked species distribution models and macroecological models provide congruent projections of avian species richness under climate change	JOURNAL OF BIOGEOGRAPHY	English	Article	Biodiversity; birds; climate change; conservation; macroecology; North America; seasonality; species distribution models	POTENTIAL IMPACTS; ENVELOPE MODELS; EXTINCTION RISK; SCALE PATTERNS; NORTH-AMERICA; RANGE SHIFTS; CONSERVATION; BIODIVERSITY; ENERGY; DIVERSITY	Aim Using survey data for North American birds, we assess how well historical patterns of species richness are explained by stacked species distribution models and macroecological models. We then describe the degree to which projections of future species richness differ, employing both modelling approaches across multiple emissions scenarios. Location USA and Canada. Methods We use Audubon Christ…	[Distler, Trisha; Schuetz, Justin G.; Velasquez-Tibata, Jorge] Natl Audubon Soc, San Francisco, CA 94104 USA.|[Langham, Gary M.] Natl Audubon Soc, Washington, DC 20036 USA.	Distler, T (reprint author), Natl Audubon Soc, 220 Montgomery St, San Francisco, CA 94104 USA.	climatescience@audubon.org	Algar AC, 2009, ECOGRAPHY, V32, P22, DOI 10.1111/j.1600-0587.2009.05832.x|Brooks TM, 2006, SCIENCE, V313, P58, DOI 10.1126/science.1127609|Calabrese JM, 2014, GLOBAL ECOL BIOGEOGR, V23, P99, DOI 10.1111/geb.12102|Evans KL, 2006, GLOBAL ECOL BIOGEOGR, V15, P372, DOI 10.1111/j.1466-822x.2006.00228.x|Kearney MR, 2010, CONSERV LETT, V3, P203, DOI 10.1111/j.1755-263X.2010.00097.x|Fleishman E, 2006, EC…	68	1	1	27	27	WILEY-BLACKWELL	HOBOKEN	111 RIVER ST, HOBOKEN 07030-5774, NJ USA	0305-0270	1365-2699	J BIOGEOGR	J. Biogeogr.	MAY	2015	42	976	988	10.1111/jbi.12479	13	Ecology; Geography, Physical	Environmental Sciences & Ecology; Physical Geography	CF8GH	WOS:000352793700015		US Fish and Wildlife Service through the National Landscape Conservation Cooperative Fund [F11AP00380/91200-1-9700]	This research was supported by a grant from the US Fish and Wildlife Service through the National Landscape Conservation Cooperative Fund (contract no. F11AP00380/91200-1-9700). We would like to thank Eleanora Babij from the US Fish and Wildlife Service and Dan McKenney and Pia Papadopol at the Canadian Forest Service. We thank David Currie, Karl Evans and two anonymous referees for their comment…	5
	J	Galloway, MA|Willett, KW|Fortson, LF|Cardamone, CN|Schawinski, K|Cheung, E|Lintott, CJ|Masters, KL|Melvin, T|Simmons, BD	Galloway, Melanie A.|Willett, Kyle W.|Fortson, Lucy F.|Cardamone, Carolin N.|Schawinski, Kevin|Cheung, Edmond|Lintott, Chris J.|Masters, Karen L.|Melvin, Thomas|Simmons, Brooke D.	Galaxy Zoo: the effect of bar-driven fuelling on the presence of an active galactic nucleus in disc galaxies	MONTHLY NOTICES OF THE ROYAL ASTRONOMICAL SOCIETY	English	Article	galaxies: active; galaxies: Seyfert; galaxies: spiral	SUPERMASSIVE BLACK-HOLES; DIGITAL SKY SURVEY; CENTRAL MASS CONCENTRATIONS; SECULAR EVOLUTION; STAR-FORMATION; HOST GALAXIES; MORPHOLOGICAL CLASSIFICATIONS; SEYFERT-GALAXIES; COSMIC EVOLUTION; SPIRAL GALAXIES	We study the influence of the presence of a strong bar in disc galaxies which host an active galactic nucleus (AGN). Using data from the Sloan Digital Sky Survey and morphological classifications from the Galaxy Zoo 2 project, we create a volume-limited sample of 19 756 disc galaxies at 0.01< z < 0.05 which have been visually examined for the presence of a bar. Within this sample, AGN host galaxi…	[Galloway, Melanie A.; Willett, Kyle W.; Fortson, Lucy F.] Univ Minnesota, Sch Phys & Astron, Minneapolis, MN 55455 USA.|[Cardamone, Carolin N.] Wheelock Coll, Dept Sci, Boston, MA 02215 USA.|[Schawinski, Kevin] ETH, Dept Phys, Inst Astron, CH-8093 Zurich, Switzerland.|[Cheung, Edmond] Univ Calif Santa Cruz, Dept Astron & Astrophys, Santa Cruz, CA 95064 USA.|[Cheung, Edmond] Univ Tokyo, Kavli IPM…	Galloway, MA (reprint author), Univ Minnesota, Sch Phys & Astron, 116 Church St SE, Minneapolis, MN 55455 USA.	galloway@physics.umn.edu	Abazajian KN, 2009, ASTROPHYS J SUPPL S, V182, P543, DOI 10.1088/0067-0049/182/2/543|Aird J, 2012, ASTROPHYS J, V746, DOI 10.1088/0004-637X/746/1/90|Alonso MS, 2013, ASTRON ASTROPHYS, V549, DOI 10.1051/0004-6361/201220117|Ann HB, 2005, ASTROPHYS J, V620, P197, DOI 10.1086/426008|Kauffmann G, 2003, MON NOT R ASTRON SOC, V346, P1055, DOI 10.1111/j.1365-2966.2003.07154.x|Kormendy J, 2004, ANNU REV A…	73	1	1	1	1	OXFORD UNIV PRESS	OXFORD	GREAT CLARENDON ST, OXFORD OX2 6DP, ENGLAND	0035-8711	1365-2966	MON NOT R ASTRON SOC	Mon. Not. Roy. Astron. Soc.	2015-04-21	2015	448	3442	3454	10.1093/mnras/stv235	13	Astronomy & Astrophysics	Astronomy & Astrophysics	CE0WF	WOS:000351529500039		Leverhulme Trust; US National Science Foundation [DRL-0941610]; UMN Grant-in-Aid programme; Swiss National Science Foundation [PP00P2_138979/1]; STFC [ST/J500665/1, ST/K00090X/1]; Worcester College, Oxford; Oxford Martin School programme on computational cosmology	The development of Galaxy Zoo 2 was supported by the Leverhulme Trust. MAG, KWW and LFF would like to acknowledge support from the US National Science Foundation under grant DRL-0941610 and from the UMN Grant-in-Aid programme. KS gratefully acknowledges support from Swiss National Science Foundation Grant PP00P2_138979/1. TM acknowledges funding from the STFC ST/J500665/1. RCN was partially suppo…	4
	J	Morrison, CA|Robinson, RA|Clark, JA|Leech, DI|Gill, JA	Morrison, Catriona A.|Robinson, Robert A.|Clark, Jacquie A.|Leech, Dave I.|Gill, Jennifer A.	Season-long consequences of shifts in timing of breeding for productivity in Willow Warblers, Phylloscopus trochilus	BIRD STUDY	English	Article		DISTANCE MIGRATORY BIRD; CLIMATE-CHANGE; POPULATION TRENDS; MAYFIELD METHOD; NEST SUCCESS; ARRIVAL DATE; PERFORMANCE; UK; ENVIRONMENTS; SELECTION	Capsule Breeding Willow Warblers, Phylloscopus trochilus, in the UK have advanced in timing of breeding but with little impact on overall productivity. Aims To quantify the impact of shifts in timing of breeding on changes in Willow Warbler productivity across the UK. Methods Using records of similar to 7000 nests from the British Trust for Ornithology Nest Record Scheme, we quantify shifts in ti…	[Morrison, Catriona A.; Gill, Jennifer A.] Univ E Anglia, Sch Biol Sci, Norwich NR4 7TJ, Norfolk, England.|[Robinson, Robert A.; Clark, Jacquie A.; Leech, Dave I.] The Nunnery, BTO, Thetford IP24 2PU, Norfolk, England.	Morrison, CA (reprint author), Univ E Anglia, Sch Biol Sci, Norwich Res Pk, Norwich NR4 7TJ, Norfolk, England.	c.morrison@uea.ac.uk	Aebischer NJ, 1999, BIRD STUDY, V46, P22|Alves JA, 2013, ECOLOGY, V94, P11|ARVIDSSON BL, 1991, BEHAV ECOL SOCIOBIOL, V29, P225, DOI 10.1007/BF00166406|Both C, 2001, NATURE, V411, P296, DOI 10.1038/35077063|Both C, 2007, CLIM RES, V35, P93, DOI 10.3354/cr00716|Both C, 2010, CURR BIOL, V20, P243, DOI 10.1016/j.cub.2009.11.074|Both C, 2006, NATURE, V441, P81, DOI 10.1038/nature04539|Crick HQP, 2003,…	41	0	0	9	9	TAYLOR & FRANCIS LTD	ABINGDON	4 PARK SQUARE, MILTON PARK, ABINGDON OX14 4RN, OXON, ENGLAND	0006-3657	1944-6705	BIRD STUDY	Bird Stud.	2015-04-03	2015	62	161	169	10.1080/00063657.2015.1006575	9	Ornithology	Zoology	CH3UW	WOS:000353957000002		NERC Open CASE studentship; BTO as CASE partner	This research was funded through a NERC Open CASE studentship, with BTO as CASE partner.	2				Gill, Jennifer/A-7759-2008
	J	Loss, SR|Loss, SS|Will, T|Marra, PP	Loss, Scott R.|Loss, Sara S.|Will, Tom|Marra, Peter P.	Linking place-based citizen science with large-scale conservation research: A case study of bird-building collisions and the role of professional scientists	BIOLOGICAL CONSERVATION	English	Article	Bird-building collisions; Citizen science; Data-intensive science; Public participation in scientific research; Window collisions	ECOLOGICAL RESEARCH; TOOL; MORTALITY; BIODIVERSITY; CHALLENGES; CANADA; EBIRD	A primary benefit of incorporating public participation in scientific research is the increased ability to use data from multiple localities to address conservation research and management objectives that span national, continental, and even global scales. Although the importance of incorporating data from local citizen science programs into large-scale research has been widely recognized, there …	[Loss, Scott R.; Loss, Sara S.; Marra, Peter P.] Natl Zool Pk, Smithsonian Conservat Biol Inst, Migratory Bird Ctr, Washington, DC 20013 USA.|[Will, Tom] US Fish & Wildlife Serv, Div Migratory Birds, Midwest Reg Off, Bloomington, MN 55437 USA.	Loss, SR (reprint author), Oklahoma State Univ, Dept Nat Resource Ecol & Management, 008C Ag Hall, Stillwater, OK 74078 USA.	scott.loss@okstate.edu; sara.loss@okstate.edu; tom_will@fws.gov; marrap@si.edu	Reynolds JA, 2013, FRONT ECOL ENVIRON, V11, P565, DOI 10.1890/1540-9295-11.10.565|Bonney R, 2009, BIOSCIENCE, V59, P977, DOI 10.1525/bio.2009.59.11.9|Dickinson JL, 2012, FRONT ECOL ENVIRON, V10, P291, DOI 10.1890/110236|Bonter DN, 2012, FRONT ECOL ENVIRON, V10, P305, DOI 10.1890/110273|Cooper CB, 2007, ECOL SOC, V12|Dickinson JL, 2010, ANNU REV ECOL EVOL S, V41, P149, DOI 10.1146/annurev-ecolsys-…	39	0	0	32	32	ELSEVIER SCI LTD	OXFORD	THE BOULEVARD, LANGFORD LANE, KIDLINGTON, OXFORD OX5 1GB, OXON, ENGLAND	0006-3207	1873-2917	BIOL CONSERV	Biol. Conserv.	APR	2015	184	439	445	10.1016/j.biocon.2015.02.023	7	Biodiversity Conservation; Ecology; Environmental Sciences	Biodiversity & Conservation; Environmental Sciences & Ecology	CG1BE	WOS:000353007200048		U.S. Fish and Wildlife Service through the Smithsonian Institution's Postdoctoral Fellowship program	We thank the building collision monitoring programs that contributed data, responded to inquiries, and provided feedback on analyses and suggested best practices. We specifically thank K. Brand (Lights Out Winston-Salem, Forsyth County Audubon Society & Audubon North Carolina), A. Duren (Lights Out Columbus, Ohio Bird Conservation Initiative & Grange Insurance Audubon Center), M. Coolidge (Bird S…
	J	Leeper, RD|Rennie, J|Palecki, MA	Leeper, Ronald D.|Rennie, Jared|Palecki, Michael A.	Observational Perspectives from US Climate Reference Network (USCRN) and Cooperative Observer Program (COOP) Network: Temperature and Precipitation Comparison	JOURNAL OF ATMOSPHERIC AND OCEANIC TECHNOLOGY	English	Article		WEATHER STATION NETWORKS; UNITED-STATES; RADIATION SHIELDS; ASOS; ACCURACY; MMTS	The U. S. Cooperative Observer Program (COOP) network was formed in the early 1890s to provide daily observations of temperature and precipitation. However, manual observations from naturally aspirated temperature sensors and unshielded precipitation gauges often led to uncertainties in atmospheric measurements. Advancements in observational technology (ventilated temperature sensors, well-shield…	[Leeper, Ronald D.; Rennie, Jared] N Carolina State Univ, Cooperat Inst Climate & Satellites North Carolina, Asheville, NC USA.|[Leeper, Ronald D.; Rennie, Jared; Palecki, Michael A.] NOAA, Natl Climat Data Ctr, Asheville, NC USA.	Leeper, RD (reprint author), Natl Climat Ctr, CICS NC, 151 Patton Ave, Asheville, NC 28801 USA.	ronald.leeper@noaa.gov	Allard J, 2009, THEOR APPL CLIMATOL, V96, P173, DOI 10.1007/s00704-008-0021-9|Rasmussen R, 2012, B AM METEOROL SOC, V93, P811, DOI 10.1175/BAMS-D-11-00052.1|Menne MJ, 2009, B AM METEOROL SOC, V90, P993, DOI 10.1175/2008BAMS2613.1|GROISMAN PY, 1994, B AM METEOROL SOC, V75, P215, DOI 10.1175/1520-0477(1994)075<0215:TAOUSP>2.0.CO;2|Peterson TC, 1998, INT J CLIMATOL, V18, P1493, DOI 10.1002/(SICI)109…	48	3	3	3	3	AMER METEOROLOGICAL SOC	BOSTON	45 BEACON ST, BOSTON, MA 02108-3693 USA	0739-0572	1520-0426	J ATMOS OCEAN TECH	J. Atmos. Ocean. Technol.	APR	2015	32	703	721	10.1175/JTECH-D-14-00172.1	19	Engineering, Ocean; Meteorology & Atmospheric Sciences	Engineering; Meteorology & Atmospheric Sciences	CG0OT	WOS:000352966600005		NOAA through the Cooperative Institute for Climate and Satellites-North Carolina [NA09NES4400006]; NOAA Climate Program Office	This work was supported by NOAA through the Cooperative Institute for Climate and Satellites-North Carolina under Cooperative Agreement NA09NES4400006. USCRN is supported by the NOAA Climate Program Office. We especially thank Scott Embler for his technical assistance; and Matt Menne, Jay Lawrimore, Tom Peterson, and the external reviewers for their editorial suggestions. The views and opinions, …	4			Rennie, Jared/0000-0002-3316-9668	Rennie, Jared/E-2984-2015
	J	Roy, DB|Ploquin, EF|Randle, Z|Risely, K|Botham, MS|Middlebrook, I|Noble, D|Cruickshanks, K|Freeman, SN|Brereton, TM	Roy, D. B.|Ploquin, E. F.|Randle, Z.|Risely, K.|Botham, M. S.|Middlebrook, I.|Noble, D.|Cruickshanks, K.|Freeman, S. N.|Brereton, T. M.	Comparison of trends in butterfly populations between monitoring schemes	JOURNAL OF INSECT CONSERVATION	English	Article	Butterfly monitoring scheme; Lepidoptera; Citizen science; Abundance trends; Biodiversity indicators	BRITISH BUTTERFLIES; UNITED-KINGDOM; CLIMATE-CHANGE; RANGE; ABUNDANCE; BIRDS; VARIABILITY; INDICATORS; PLANTS; AREAS	Butterflies are an important indicator of the impacts of environmental change. Butterfly monitoring schemes (BMS) have provided national and Europe-wide trends in their abundance and been widely used for research. Most schemes sample sites that are self-selected by contributors and therefore tend to cover locations that are rich in butterflies. To provide a more representative assessment of butte…	[Roy, D. B.; Ploquin, E. F.; Botham, M. S.; Freeman, S. N.] NERC Ctr Ecol & Hydrol, Wallingford, Oxon, England.|[Randle, Z.; Middlebrook, I.; Brereton, T. M.] Butterfly Conservat, Wareham, Dorset, England.|[Risely, K.; Noble, D.] British Trust Ornithol, Thetford, England.|[Cruickshanks, K.] Footprint Ecol, Wareham, Dorset, England.	Roy, DB (reprint author), NERC Ctr Ecol & Hydrol, Wallingford, Oxon, England.	dbr@ceh.ac.uk	Chen IC, 2011, SCIENCE, V333, P1024, DOI 10.1126/science.1206432|Thomas JA, 2005, PHILOS T ROY SOC B, V360, P339, DOI 10.1098/rstb.2004.1585|Gregory RD, 2005, PHILOS T R SOC B, V360, P269, DOI 10.1098/rstb.2004.1602|Thomas CD, 2012, P NATL ACAD SCI USA, V109, P14063, DOI 10.1073/pnas.1210251109|Warren MS, 2001, NATURE, V414, P65, DOI 10.1038/35102054|Pereira HM, 2012, ANNU REV ENV RESOUR, V37, P2…	46	3	3	14	14	SPRINGER	DORDRECHT	VAN GODEWIJCKSTRAAT 30, 3311 GZ DORDRECHT, NETHERLANDS	1366-638X	1572-9753	J INSECT CONSERV	J. Insect Conserv.	APR	2015	19	313	324	10.1007/s10841-014-9739-0	12	Biodiversity Conservation; Entomology	Biodiversity & Conservation; Entomology	CG4CK	WOS:000353229100012		Countryside Council for Wales; Defra; Joint Nature Conservation Committee; Forestry Commission; Natural England; Natural Environment Research Council; Scottish Natural Heritage	The UKBMS is operated by the Centre for Ecology and Hydrology, Butterfly Conservation and the British Trust for Ornithology and funded by a multi-agency consortium including the Countryside Council for Wales, Defra, the Joint Nature Conservation Committee, Forestry Commission, Natural England, the Natural Environment Research Council, and Scottish Natural Heritage. The UKBMS is indebted to all vo…	2			Roy, David/0000-0002-5147-0331	Roy, David/A-6619-2009	SI
	J	Dobson, LL|La Sorte, FA|Manne, LL|Hawkins, BA	Dobson, LuAnna L.|La Sorte, Frank A.|Manne, Lisa L.|Hawkins, Bradford A.	The diversity and abundance of North American bird assemblages fail to track changing productivity	ECOLOGY	English	Article	bird species richness; Breeding Bird Survey; climate; community richness; diversity gradients, more individuals hypothesis; NDVI; productivity hypothesis; species-energy theory; species richness	SPECIES-ENERGY RELATIONSHIPS; TEMPORAL TURNOVER; FOREST STRUCTURE; CLIMATE-CHANGE; RICHNESS; COMMUNITIES; PATTERNS; GRADIENT; SCALE; HOMOGENIZATION	Plant biomass or productivity and the species richness of birds are associated across a range of spatial scales. Species-energy theory is generally assumed to explain these correlations. If true, bird richness should also track productivity temporally, and there should be spatial and temporal relationships between productivity and both bird abundance and bird richness. Using the summer normalized…	[Dobson, LuAnna L.; Hawkins, Bradford A.] Univ Calif Irvine, Dept Ecol & Evolutionary Biol, Irvine, CA 92697 USA.|[La Sorte, Frank A.] Cornell Univ, Cornell Lab Ornithol, Ithaca, NY 14850 USA.|[Manne, Lisa L.] CUNY Coll Staten Isl, Dept Ecol & Evolutionary Biol, Staten Isl, NY 10314 USA.	Dobson, LL (reprint author), Univ Calif Irvine, Dept Ecol & Evolutionary Biol, Irvine, CA 92697 USA.	ldobson@uci.edu	Evans KL, 2006, GLOBAL ECOL BIOGEOGR, V15, P372, DOI 10.1111/j.1466-822x.2006.00228.x|Hawkins BA, 2012, J BIOGEOGR, V39, P1, DOI 10.1111/j.1365-2699.2011.02637.x|Evans KL, 2005, BIOL REV, V80, P1, DOI 10.1017/S1464793104006517|MACARTHUR R, 1961, ECOLOGY, V42, P594, DOI 10.2307/1932254|Currie DJ, 2004, ECOL LETT, V7, P1121, DOI 10.1111/j.1461-0248.2004.00671.x|Brown JH, 2014, J BIOGEOGR, V41, P8, …	51	0	0	18	18	ECOLOGICAL SOC AMER	WASHINGTON	1990 M STREET NW, STE 700, WASHINGTON, DC 20036 USA	0012-9658	1939-9170	ECOLOGY	Ecology	APR	2015	96	1105	1114	10.1890/14-0057.1	10	Ecology	Environmental Sciences & Ecology	CG1MY	WOS:000353038200021				4		26230030
	J	Allard, J|Thompson, C|Keim, BD	Allard, Jason|Thompson, Clint|Keim, Barry D.	How robust is the pre-1931 National Climatic Data Center-climate divisional dataset? Examples from Georgia and Louisiana	THEORETICAL AND APPLIED CLIMATOLOGY	English	Article		SOUTHEASTERN UNITED-STATES; TEMPERATURE TRENDS; VARIABILITY; DROUGHT; CALIFORNIA	The National Climatic Data Center's climate divisional dataset (CDD) is commonly used in climate change analyses. This dataset is a spatially continuous dataset for the conterminous USA from 1895 to the present. The CDD since 1931 is computed by averaging all available representative cooperative weather station data into a single monthly value for each of the 344 climate divisions of the contermi…	[Allard, Jason] Valdosta State Univ, Dept Phys Astron & Geosci, Valdosta, GA 31698 USA.|[Thompson, Clint] Univ Kansas, Dept Geog, Lawrence, KS 66045 USA.|[Keim, Barry D.] Louisiana State Univ, Dept Geog & Anthropol, Baton Rouge, LA 70803 USA.	Allard, J (reprint author), Valdosta State Univ, Dept Phys Astron & Geosci, Valdosta, GA 31698 USA.	jmallard@valdosta.edu	Abatzoglou JT, 2009, J APPL METEOROL CLIM, V48, P1527, DOI 10.1175/2009JAMC2062.1|Allard J, 2009, THEOR APPL CLIMATOL, V96, P173, DOI 10.1007/s00704-008-0021-9|Menne MJ, 2009, B AM METEOROL SOC, V90, P993, DOI 10.1175/2008BAMS2613.1|McRoberts DB, 2011, J APPL METEOROL CLIM, V50, P1187, DOI 10.1175/2010JAMC2626.1|Seager R, 2009, J CLIMATE, V22, P5021, DOI 10.1175/2009JCLI2683.1|Svoboda M, 2002, B …	27	0	0	0	0	SPRINGER WIEN	WIEN	SACHSENPLATZ 4-6, PO BOX 89, A-1201 WIEN, AUSTRIA	0177-798X	1434-4483	THEOR APPL CLIMATOL	Theor. Appl. Climatol.	APR	2015	120	323	330	10.1007/s00704-014-1175-2	8	Meteorology & Atmospheric Sciences	Meteorology & Atmospheric Sciences	CE5IY	WOS:000351866800027				2015-01-02
	J	Fristoe, TS	Fristoe, Trevor S.	Energy use by migrants and residents in North American breeding bird communities	GLOBAL ECOLOGY AND BIOGEOGRAPHY	English	Article	Breeding Bird Survey; climate change; community assembly; energetics; latitudinal gradient; macroecology; metabolic ecology; metabolism; Migration; seasonality	DISTANCE MIGRATORY BIRDS; WINTER SPARROW DENSITIES; SPECIES RICHNESS; CLIMATE-CHANGE; ABUNDANCE; DISTRIBUTIONS; TEMPERATE; RAINFALL; REGIONS; FOREST	AimOf the order of 5 billion birds comprising more than 700,000 tonnes of biomass migrate across North America every year to exploit seasonal resource pulses at high latitudes during breeding. Despite this impressive scale, little is known about the metabolic role of these migrants in their breeding grounds across temperate ecosystems. I estimate the energy use of short- and long-distance migrant…	Univ New Mexico, Dept Biol, Albuquerque, NM 87131 USA.	Fristoe, TS (reprint author), Univ New Mexico, Dept Biol, 167 Castetter Hall,MSC03 2020, Albuquerque, NM 87131 USA.	tfristoe@unm.edu	Ahn C. H., 1994, J JAPANESE SOC PHOTO, V33, P12|Alerstam T., 1990, P331|Brown JH, 2014, J BIOGEOGR, V41, P8, DOI 10.1111/jbi.12228|Brown JH, 2004, ECOLOGY, V85, P1771, DOI 10.1890/03-9000|Hinzman LD, 2005, CLIMATIC CHANGE, V72, P251, DOI 10.1007/s10584-005-5352-2|Biadun W, 2011, POL J ENVIRON STUD, V20, P843|Bohning-Gaese K, 2003, OECOLOGIA, V137, P296, DOI 10.1007/s00442-003-1346-9|Butler CJ, 20…	36	0	0	18	18	WILEY-BLACKWELL	HOBOKEN	111 RIVER ST, HOBOKEN 07030-5774, NJ USA	1466-822X	1466-8238	GLOBAL ECOL BIOGEOGR	Glob. Ecol. Biogeogr.	APR	2015	24	406	415	10.1111/geb.12262	10	Ecology; Geography, Physical	Environmental Sciences & Ecology; Physical Geography	CD3RL	WOS:000350997800003		NSF Macrosystems Biology [EF 1065836]	This research would not have been possible without the efforts of the countless volunteers who conduct the Breeding Bird Survey every year. I am also very grateful for the advice of James H. Brown, Felisa Smith, Christopher Witt, Joseph R. Burger, GEB editor Katrin Bohning-Gaese, a number of anonymous referees and to Jose M. Blanco-Moreno for kindly supplying his useful R package. Funding was pro…	4
	J	Morrison, CA|Baillie, SR|Clark, JA|Johnston, A|Leech, DI|Robinson, RA	Morrison, Catriona A.|Baillie, Stephen R.|Clark, Jacquie A.|Johnston, Alison|Leech, David I.|Robinson, Robert A.	Flexibility in the timing of post-breeding moult in passerines in the UK	IBIS	English	Article	annual cycles; autumn; breeding season; climate change; migration; phenology	STARLINGS STURNUS-VULGARIS; CLIMATE-CHANGE; FEATHER GROWTH; GONADAL MATURATION; DEPARTURE DATES; MIGRATORY BIRD; TRADE-OFF; MASS; REGRESSION; SPARROWS	Higher temperatures resulting from climate change have led to predictions that the duration of the breeding season of many temperate bird species may be changing. However, the extent to which breeding seasons can be altered will also depend on the degree of flexibility in processes occurring at other points in the annual cycle. In particular, plasticity in the timing of post-breeding moult (PBM) …	[Morrison, Catriona A.; Baillie, Stephen R.; Clark, Jacquie A.; Johnston, Alison; Leech, David I.; Robinson, Robert A.] The Nunnery, British Trust Ornithol, Thetford IP24 2PU, Norfolk, England.|[Morrison, Catriona A.] Univ E Anglia, Sch Biol Sci, Norwich NR4 7TJ, Norfolk, England.	Morrison, CA (reprint author), The Nunnery, British Trust Ornithol, Thetford IP24 2PU, Norfolk, England.	c.morrison@uea.ac.uk	Alves JA, 2012, OIKOS, V121, P464, DOI 10.1111/j.1600-0706.2011.19678.x|Marra PP, 1998, SCIENCE, V282, P1884, DOI 10.1126/science.282.5395.1884|Ashmole N. P., 1962, Ibis, V103b, P235, DOI 10.1111/j.1474-919X.1962.tb07246.x|Barshep Y, 2013, ECOL EVOL, V3, P1967, DOI 10.1002/ece3.612|Barta Z, 2006, OIKOS, V112, P580, DOI 10.1111/j.0030-1299.2006.14240.x|Bonier F, 2007, ECOLOGY, V88, P2729, DOI 10.1…	68	0	0	12	12	WILEY-BLACKWELL	HOBOKEN	111 RIVER ST, HOBOKEN 07030-5774, NJ USA	0019-1019	1474-919X	IBIS	Ibis	APR	2015	157	340	350	10.1111/ibi.12234	11	Ornithology	Zoology	CE1XB	WOS:000351605100011		British Trust for Ornithology; Joint Nature Conservation Committee; Natural Resources Wales; Natural England; Scottish Natural Heritage; Department of the Environment Northern Ireland; National Parks and Wildlife Service (Ireland)	The BTO Ringing and Nest Record Schemes are funded by a partnership of the British Trust for Ornithology, the Joint Nature Conservation Committee (on behalf of Natural England, Natural Resources Wales, Scottish Natural Heritage and the Department of the Environment Northern Ireland). The Ringing Scheme is also funded by The National Parks and Wildlife Service (Ireland) and the ringers themselves.…	2			Robinson, Robert/0000-0003-0504-9906; Baillie, Stephen/0000-0001-5126-9470	Robinson, Robert/B-8237-2009; Baillie, Stephen/H-3023-2013
	J	Robinson, LM|Gledhill, DC|Moltschaniwskyj, NA|Hobday, AJ|Frusher, S|Barrett, N|Stuart-Smith, J|Pecl, GT	Robinson, L. M.|Gledhill, D. C.|Moltschaniwskyj, N. A.|Hobday, A. J.|Frusher, S.|Barrett, N.|Stuart-Smith, J.|Pecl, G. T.	Rapid assessment of an ocean warming hotspot reveals "high" confidence in potential species' range extensions	GLOBAL ENVIRONMENTAL CHANGE-HUMAN AND POLICY DIMENSIONS	English	Article		CLIMATE-CHANGE; MARINE SYSTEMS; SHIFTS; MANAGEMENT; ADAPTATION; INVASIONS; DYNAMICS; FISHES; THREAT; PLANTS	Shifts in species' ranges are one of the most frequently reported and globally ubiquitous impacts of climate change, with rates of movement being particularly high in the sea. The arrival of multiple range extending species can cause serious issues for natural resource managers; some species threaten ecosystem function while others present social and/or economic opportunities. An early indication…	[Robinson, L. M.; Moltschaniwskyj, N. A.; Frusher, S.; Barrett, N.; Stuart-Smith, J.; Pecl, G. T.] Univ Tasmania, Inst Marine & Antarctic Studies, Fisheries Aquaculture & Coasts, Hobart, Tas 7001, Australia.|[Gledhill, D. C.; Hobday, A. J.] CSIRO Marine & Atmospher Res, CSIRO Wealth Oceans and Climate Adaptat Flagships, Hobart, Tas 7001, Australia.|[Moltschaniwskyj, N. A.] Univ Newcastle, Sch Env…	Robinson, LM (reprint author), Commiss Conservat Antarctic Marine Living Resourc, 181 Macquarie St, Hobart, Tas 7000, Australia.	lucy.m.e.robinson@gmail.com	Poloczanska ES, 2013, NAT CLIM CHANGE, V3, P919, DOI [10.1038/nclimate1958, 10.1038/NCLIMATE1958]|Chen IC, 2011, SCIENCE, V333, P1024, DOI 10.1126/science.1206432|Bax N, 2003, MAR POLICY, V27, P313, DOI 10.1016/S0308-597X(03)00041-1|Hobday AJ, 2011, FISH RES, V108, P372, DOI 10.1016/j.fishres.2011.01.013|Last PR, 2011, GLOBAL ECOL BIOGEOGR, V20, P58, DOI 10.1111/j.1466-8238.2010.00575.x|Hiscock K…	42	0	0	13	13	ELSEVIER SCI LTD	OXFORD	THE BOULEVARD, LANGFORD LANE, KIDLINGTON, OXFORD OX5 1GB, OXON, ENGLAND	0959-3780	1872-9495	GLOBAL ENVIRON CHANG	Glob. Environ. Change-Human Policy Dimens.	MAR	2015	31	28	37	10.1016/j.gloenvcha.2014.12.003	10	Environmental Sciences; Environmental Studies; Geography	Environmental Sciences & Ecology; Geography	CJ3BU	WOS:000355359200004		Tasmanian Climate Change Office; James Cook University; University of Tasmania; University of Western Australia	The Tasmanian Climate Change Office provided funding for workshops and some salary costs. The Australian National Network in Marine Science, a collaborative funding initiative between James Cook University, the University of Tasmania, and the University of Western Australia, provided additional salary support. Rick Stuart-Smith and Graham Edgar provided expert knowledge on species traits, comment…
	J	Macias-Duarte, A|Conway, CJ	Macias-Duarte, Alberto|Conway, Courtney J.	DISTRIBUTIONAL CHANGES IN THE WESTERN BURROWING OWL (ATHENE CUNICULARIA HYPUGAEA) IN NORTH AMERICA FROM 1967 TO 2008	JOURNAL OF RAPTOR RESEARCH	English	Article	Burrowing Owl; Athene cunicularia; Fourier series; geographic range; logistic regression; North American Breeding Bird Survey	RANGES; ISSUES; BIRDS	The quantification of shifts in bird distributions in response to climate change provides an opportunity to gain a deeper understanding of the processes that influence species persistence. We used data from the North American Breeding Bird Survey (BBS) to document changes in the distributional limits of the western Burrowing Owl (Athene cunicularia hypugaea) from 1967 to 2008. We used logistic re…	[Macias-Duarte, Alberto] Univ Arizona, Sch Nat Resources & Environm, Arizona Cooperat Fish & Wildlife Res Unit, Tucson, AZ 85721 USA.|[Conway, Courtney J.] Univ Idaho, Dept Fish & Wildlife Sci, US Geol Survey, Idaho Cooperat Fish & Wildlife Res Unit, Moscow, ID 83844 USA.	Macias-Duarte, A (reprint author), Univ Arizona, Sch Nat Resources & Environm, Arizona Cooperat Fish & Wildlife Res Unit, Tucson, AZ 85721 USA.	alberto.macias@ues.mx	Anderson DR, 2007, MODEL BASED INFERENC|ANDREWARTHA H.G., 1961, INTRO STUDY ANIMAL P|EUBANK RL, 1990, BIOMETRIKA, V77, P1|Hitch AT, 2007, CONSERV BIOL, V21, P534, DOI 10.1111/j.1523-1739.2006.00609.x|Fortin MJ, 2005, OIKOS, V108, P7, DOI 10.1111/j.0030-1299.2005.13146.x|Thomas CD, 1999, NATURE, V399, P213, DOI 10.1038/20335|BROWN J., 2011, FOURIER SERIES BOUND|Clayton KM, 1999, BIRD CONSERV INT, …	30	0	0	32	41	RAPTOR RESEARCH FOUNDATION INC	HASTINGS	14377 117TH STREET SOUTH, HASTINGS, MN 55033 USA	0892-1016	2162-4569	J RAPTOR RES	J. Raptor Res.	MAR	2015	49	75	83		9	Ornithology	Zoology	CB7VO	WOS:000349836800007		Russell E. Train Education for Nature Program of the World Wildlife Fund; iPlant Collaborative; U.S. Department of Defense (DoD) Legacy program; Rocky Mountain Bird Observatory; U.S. National Park Service; American Ornithologists' Union; University of Arizona (UA); Sonoran Joint Venture of the U.S. Fish and Wildlife Service; Silliman Memorial Research Award, TE, Inc.; UA PAN-GAS project; Wallace …	This report was made possible due to the financial support of Russell E. Train Education for Nature Program of the World Wildlife Fund, iPlant Collaborative, U.S. Department of Defense (DoD) Legacy program, Rocky Mountain Bird Observatory, U.S. National Park Service, American Ornithologists' Union, The University of Arizona (UA), Sonoran Joint Venture of the U.S. Fish and Wildlife Service, Sillim…	1
	J	Hsieh, HH|Denneau, L|Wainscoat, RJ|Schorghofer, N|Bolin, B|Fitzsimmons, A|Jedicke, R|Kleyna, J|Micheli, M|Veres, P|Kaiser, N|Chambers, KC|Burgett, WS|Flewelling, H|Hodapp, KW|Magnier, EA|Morgan, JS|Price, PA|Tonry, JL|Waters, C	Hsieh, Henry H.|Denneau, Larry|Wainscoat, Richard J.|Schoerghofer, Norbert|Bolin, Bryce|Fitzsimmons, Alan|Jedicke, Robert|Kleyna, Jan|Micheli, Marco|Veres, Peter|Kaiser, Nicholas|Chambers, Kenneth C.|Burgett, William S.|Flewelling, Heather|Hodapp, Klaus W.|Magnier, Eugene A.|Morgan, Jeffrey S.|Price, Paul A.|Tonry, John L.|Waters, Christopher	The main-belt comets: The Pan-STARRS1 perspective	ICARUS	English	Article	Asteroids; Comets; Astrobiology; Asteroids, composition; Comets, origin	P/2012 F5 GIBBS; C/2012 S1 ISON; R2 LA SAGRA; TERRESTRIAL PLANET FORMATION; TELESCOPE LEGACY SURVEY; ASTEROID 596 SCHEILA; DIGITAL-SKY-SURVEY; PAN-STARRS; GALAXY ZOO; PHYSICAL-PROPERTIES	We analyze a set of 760475 observations of 333 026 unique main-belt objects obtained by the Pan-STARRS1 (PS1) survey telescope between 2012 May 20 and 2013 November 9, a period during which PS1 discovered two main-belt comets, P/2012 T1 (PANSTARRS) and P/2013 R3 (Catalina-PANSTARRS). PS1 comet detection procedures currently consist of the comparison of the point spread functions (PSFs) of moving …	[Hsieh, Henry H.] Acad Sinica, Inst Astron & Astrophys, Taipei 10617, Taiwan.|[Hsieh, Henry H.; Denneau, Larry; Wainscoat, Richard J.; Schoerghofer, Norbert; Bolin, Bryce; Jedicke, Robert; Kleyna, Jan; Veres, Peter; Kaiser, Nicholas; Chambers, Kenneth C.; Burgett, William S.; Flewelling, Heather; Hodapp, Klaus W.; Magnier, Eugene A.; Morgan, Jeffrey S.; Tonry, John L.; Waters, Christopher] Univ H…	Hsieh, HH (reprint author), Acad Sinica, Inst Astron & Astrophys, POB 23-141, Taipei 10617, Taiwan.	hhsieh@asiaa.sinica.edu.tw	Lintott CJ, 2008, MON NOT R ASTRON SOC, V389, P1179, DOI 10.1111/j.1365-2966.2008.13689.x|Raymond SN, 2004, ICARUS, V168, P1, DOI 10.1016/j.icarus.2003.11.019|Cardamone C, 2009, MON NOT R ASTRON SOC, V399, P1191, DOI 10.1111/j.1365-2966.2009.15383.x|DeMeo FE, 2013, ICARUS, V226, P723, DOI 10.1016/j.icarus.2013.06.027|Walsh KJ, 2011, NATURE, V475, P206, DOI 10.1038/nature10201|Strauss MA, 2002, AS…	145	2	2	3	12	ACADEMIC PRESS INC ELSEVIER SCIENCE	SAN DIEGO	525 B ST, STE 1900, SAN DIEGO, CA 92101-4495 USA	0019-1035	1090-2643	ICARUS	Icarus	2015-03-01	2015	248	289	312	10.1016/j.icarus.2014.10.031	24	Astronomy & Astrophysics	Astronomy & Astrophysics	AZ7PR	WOS:000348411000019		National Aeronautics and Space Administration (NASA) through Space Telescope Science Institute [HF-51274.01, NAS 5-26555]; NASA through the NASA Astrobiology Institute [NNAO9DA77A]; NSF [AST 1010059]; Institute for Astronomy; University of Hawaii; Pan-STARRS Project Office; Max-Planck Society; Max Planck Institute for Astronomy, Heidelberg; Max Planck Institute for Extraterrestrial Physics, Garch…	We thank Pedro Lacerda and Bin Yang and two anonymous referees for helpful comments on this manuscript. H.H.H. acknowledges support for this work by the National Aeronautics and Space Administration (NASA) through Hubble Fellowship Grant HF-51274.01 awarded by the Space Telescope Science Institute, which is operated by the Association of Universities for Research in Astronomy (AURA) for NASA, und…				Micheli, Marco/0000-0001-7895-8209	Micheli, Marco/H-7598-2015
	J	Cheung, E|Trump, JR|Athanassoula, E|Bamford, SP|Bell, EF|Bosma, A|Cardamone, CN|Casteels, KRV|Faber, SM|Fang, JJ|Fortson, LF|Kocevski, DD|Koo, DC|Laine, S|Lintott, C|Masters, KL|Melvin, T|Nichol, RC|Schawinski, K|Simmons, B|Smethurst, R|Willett, KW	Cheung, Edmond|Trump, Jonathan R.|Athanassoula, E.|Bamford, Steven P.|Bell, Eric F.|Bosma, A.|Cardamone, Carolin N.|Casteels, Kevin R. V.|Faber, S. M.|Fang, Jerome J.|Fortson, Lucy F.|Kocevski, Dale D.|Koo, David C.|Laine, Seppo|Lintott, Chris|Masters, Karen L.|Melvin, Thomas|Nichol, Robert C.|Schawinski, Kevin|Simmons, Brooke|Smethurst, Rebecca|Willett, Kyle W.	Galaxy Zoo: Are bars responsible for the feeding of active galactic nuclei at 0.2 < z < 1.0?	MONTHLY NOTICES OF THE ROYAL ASTRONOMICAL SOCIETY	English	Article	galaxies: evolution; galaxies: general; galaxies: Seyfert; galaxies: structure	SUPERMASSIVE BLACK-HOLES; SPACE-TELESCOPE OBSERVATIONS; EXTRAGALACTIC LEGACY SURVEY; BARRED SPIRAL GALAXIES; EXTENDED GROTH STRIP; DEEP CHANDRA SURVEY; MS SOURCE CATALOGS; AGN HOST GALAXIES; SIMILAR-TO 2; X-RAY	We present a new study investigating whether active galactic nuclei (AGN) beyond the local universe are preferentially fed via large-scale bars. Our investigation combines data from Chandra and Galaxy Zoo: Hubble (GZH) in the AEGIS (All-wavelength Extended Groth strip International Survey), COSMOS (Cosmological Evolution Survey), and (Great Observatories Origins Deep Survey-South) GOODS-S surveys…	[Cheung, Edmond; Faber, S. M.; Fang, Jerome J.; Koo, David C.] Univ Calif Santa Cruz, Dept Astron & Astrophys, Santa Cruz, CA 95064 USA.|[Cheung, Edmond] Univ Tokyo, Kavli Inst Phys & Math Universe WPI, Todai Inst Adv Study, Kashiwa, Chiba 2778583, Japan.|[Trump, Jonathan R.] Penn State Univ, Dept Astron & Astrophys, University Pk, PA 16802 USA.|[Athanassoula, E.; Bosma, A.] Aix Marseille Univ, C…	Cheung, E (reprint author), Univ Calif Santa Cruz, Dept Astron & Astrophys, 1156 High St, Santa Cruz, CA 95064 USA.	ec2250@gmail.com	Aird J, 2010, MON NOT R ASTRON SOC, V401, P2531, DOI 10.1111/j.1365-2966.2009.15829.x|Alonso MS, 2013, ASTRON ASTROPHYS, V549, DOI 10.1051/0004-6361/201220117|Kauffmann G, 2003, MON NOT R ASTRON SOC, V346, P1055, DOI 10.1111/j.1365-2966.2003.07154.x|Ueda Y, 2003, ASTROPHYS J, V598, P886, DOI 10.1086/378940|SANDERS DB, 1988, ASTROPHYS J, V325, P74, DOI 10.1086/165983|Bruzual G, 2003, MON NOT R AST…	142	3	3	4	4	OXFORD UNIV PRESS	OXFORD	GREAT CLARENDON ST, OXFORD OX2 6DP, ENGLAND	0035-8711	1365-2966	MON NOT R ASTRON SOC	Mon. Not. Roy. Astron. Soc.	2015-02-11	2015	447	506	516	10.1093/mnras/stu2462	11	Astronomy & Astrophysics	Astronomy & Astrophysics	CC3TK	WOS:000350272700041		NSF [AST 08-08133]; Swiss National Science Foundation [PP00P2_138979/1]; NASA by the Space Telescope Science Institute [HST-HF-51330.01]; NASA [NAS 5-26555]; European Union [PITN-GA-2011-289313]; CNES (Centre National d'Etudes Spatiales - France); STFC [ST/I001204/1]; Oxford Martin School; Henry Skynner Junior Research Fellowship at Balliol College, Oxford; UMN GIA programme	Authors from UC Santa Cruz acknowledge financial support from the NSF Grant AST 08-08133. KS gratefully acknowledges support from Swiss National Science Foundation Grant PP00P2_138979/1. JRT acknowledges support by NASA through Hubble Fellowship grant HST-HF-51330.01 awarded by the Space Telescope Science Institute, which is operated by the Association of Universities for Research in Astronomy, I…	1			Bamford, Steven/0000-0001-7821-7195
	J	Kerton, CR|Wolf-Chase, G|Arvidsson, K|Lintott, CJ|Simpson, RJ	Kerton, C. R.|Wolf-Chase, G.|Arvidsson, K.|Lintott, C. J.|Simpson, R. J.	THE MILKY WAY PROJECT: WHAT ARE YELLOWBALLS?	ASTROPHYSICAL JOURNAL	English	Article	ISM: bubbles; stars: formation; stars: massive; stars: pre; main sequence; stars: protostars	H-II REGIONS; MASSIVE STAR-FORMATION; BUBBLING GALACTIC DISK; FORMING REGIONS; OUTER GALAXY; DATA RELEASE; PLANE; EMISSION; DUST; EVOLUTION	Yellowballs are a collection of approximately 900 compact, infrared sources identified and named by volunteers participating in the Milky Way Project (MWP), a citizen science project that uses GLIMPSE/MIPSGAL images from Spitzer to explore topics related to Galactic star formation. In this paper, through a combination of catalog cross-matching and infrared color analysis, we show that yellowballs…	[Kerton, C. R.] Iowa State Univ, Dept Phys & Astron, Ames, IA 50011 USA.|[Wolf-Chase, G.] Adler Planetarium, Dept Astron, Chicago, IL 60605 USA.|[Arvidsson, K.] Schreiner Univ, Trull Sch Sci & Math, Kerrville, TX 78028 USA.|[Lintott, C. J.; Simpson, R. J.] Oxford Astrophys, Oxford OX1 3RH, England.|[Wolf-Chase, G.] Univ Chicago, Dept Astron & Astrophys, Chicago, IL 60637 USA.	Kerton, CR (reprint author), Iowa State Univ, Dept Phys & Astron, 12 Phys Hall, Ames, IA 50011 USA.	kerton@iastate.edu; gwolfchase@adlerplanetarium.org; KDArvidsson@schreiner.edu; cjl@astro.ox.ac.uk; robert.simpson@astro.ox.ac.uk	Aguirre JE, 2011, ASTROPHYS J SUPPL S, V192, DOI 10.1088/0067-0049/192/1/4|Amorin R, 2012, ASTROPHYS J, V749, DOI 10.1088/0004-637X/749/2/185|Anderson LD, 2012, ASTRON ASTROPHYS, V537, DOI 10.1051/0004-6361/201117640|Anderson LD, 2014, ASTROPHYS J SUPPL S, V212, DOI 10.1088/0067-0049/212/1/1|Lintott CJ, 2008, MON NOT R ASTRON SOC, V389, P1179, DOI 10.1111/j.1365-2966.2008.13689.x|Cardamone C, 200…	44	0	0	5	5	IOP PUBLISHING LTD	BRISTOL	TEMPLE CIRCUS, TEMPLE WAY, BRISTOL BS1 6BE, ENGLAND	0004-637X	1538-4357	ASTROPHYS J	Astrophys. J.	2015-02-01	2015	799			10.1088/0004-637X/799/2/153	9	Astronomy & Astrophysics	Astronomy & Astrophysics	CA3QH	WOS:000348820900040		NASA's Illinois Space Grant Consortium; Brinson Foundation	We thank all MWP volunteers for their enthusiastic participation in this project, especially Sandy Harris, Ipspieler, Greg Galanos, and Larry West. We thank Jason Ybarra for pointing out that a high PAH ionization fraction could produce more negative log(F<INF>12</INF>/ F<INF>8</INF>) values based on his cloudy models, and Sarah Kendrew for the use of her correlation code. We also thank James Urq…	2	153
	S	Marshall, PJ|Lintott, CJ|Fletcher, LN	Marshall, Philip J.|Lintott, Chris J.|Fletcher, Leigh N.	Ideas for Citizen Science in Astronomy	ANNUAL REVIEW OF ASTRONOMY AND ASTROPHYSICS, VOL 53	English	Review; Book Chapter	observations; amateur astronomy; visual inspection; planetary science; stellar variability; galaxy morphology; optical transients; crowd-sourcing	HUBBLE-SPACE-TELESCOPE; DIGITAL-SKY-SURVEY; MILKY-WAY PROJECT; EXTRAGALACTIC LEGACY SURVEY; ARTIFICIAL NEURAL-NETWORKS; GROUND-BASED OBSERVATIONS; MODEL GALAXY COLLISIONS; FOLDING GAME PLAYERS; PLANET CANDIDATES; MORPHOLOGICAL CLASSIFICATIONS	We review the expanding, internet-enabled, and rapidly evolving field of citizen astronomy, focusing on research projects in stellar, extragalactic, and planetary science that have benefited from the participation of members of the public. These volunteers contribute in various ways: making and analyzing new observations, visually classifying features in images and light curves, exploring models …	[Marshall, Philip J.] Kavli Inst Particle Astrophys & Cosmol, Stanford, CA 94309 USA.|[Lintott, Chris J.] Univ Oxford, Dept Phys, Oxford OX1 3RH, England.|[Fletcher, Leigh N.] Univ Oxford, Atmospher Ocean & Planetary Phys, Oxford OX1 3PU, England.	Marshall, PJ (reprint author), Kavli Inst Particle Astrophys & Cosmol, Stanford, CA 94309 USA.	pjm@slac.stanford.edu; cjl@astro.ox.ac.uk; fletcher@atm.ox.ac.uk	Gould A, 2014, SCIENCE, V345, P46, DOI 10.1126/science.1251527|Lintott CJ, 2008, MON NOT R ASTRON SOC, V389, P1179, DOI 10.1111/j.1365-2966.2008.13689.x|Cardamone C, 2009, MON NOT R ASTRON SOC, V399, P1191, DOI 10.1111/j.1365-2966.2009.15383.x|Scoville N, 2007, ASTROPHYS J SUPPL S, V172, P38, DOI 10.1086/516580|Udalski A, 2005, ASTROPHYS J, V628, pL109, DOI 10.1086/432795|Koekemoer AM, 2007, ASTR…	118	0	0	1	1	ANNUAL REVIEWS	PALO ALTO	4139 EL CAMINO WAY, PO BOX 10139, PALO ALTO, CA 94303-0897 USA	0066-4146		ANNU REV ASTRON ASTR	Annu. Rev. Astron. Astrophys.		2015	53	247	278	10.1146/annurev-astro-081913-035959	32	Astronomy & Astrophysics	Astronomy & Astrophysics	BD3LH	WOS:000359857000007										Faber, SM VanDishoeck, E	Annual Review of Astronomy and Astrophysics	978-0-8243-0953-4
	J	Shilling, FM|Waetjen, DP	Shilling, Fraser M.|Waetjen, David P.	Wildlife-vehicle collision hotspots at US highway extents: scale and data source effects	NATURE CONSERVATION-BULGARIA	English	Article; Proceedings Paper	Transportation; Wildlife-Vehicle Collisions; Roadkill; Informatics; Citizen Science; Wildlife Observation; Wildlife Movement	CITIZEN SCIENCE; ROAD-MORTALITY; SPATIAL-ANALYSIS; ABUNDANCE; TOOL; IDENTIFICATION; CONSERVATION; COMMUNITIES; STATISTICS; ACCIDENTS	Highways provide commuter traffic and goods movement among regions and cities through wild, protected areas. Wildlife-vehicle collisions (WVC) can occur frequently when wildlife are present, impacting drivers and animals. Because collisions are often avoidable with constructed mitigation and reduced speeds, transportation agencies often want to know where they can act most effectively and what ki…	[Shilling, Fraser M.; Waetjen, David P.] Univ Calif Davis, Dept Environm Sci & Policy, Davis, CA 95616 USA.	Shilling, FM (reprint author), Univ Calif Davis, Dept Environm Sci & Policy, One Shields Ave, Davis, CA 95616 USA.	fmshilling@ucdavis.edu	Gunson KE, 2011, J ENVIRON MANAGE, V92, P1074, DOI 10.1016/j.jenvman.2010.11.027|Danks ZD, 2010, J WILDLIFE MANAGE, V74, P1229, DOI 10.2193/2008-358|Bonney R, 2009, BIOSCIENCE, V59, P977, DOI 10.1525/bio.2009.59.11.9|Hampton SE, 2013, FRONT ECOL ENVIRON, V11, P156, DOI 10.1890/120103|Corona P, 2011, FOREST ECOL MANAG, V262, P2061, DOI 10.1016/j.foreco.2011.08.044|Peterson AT, 2001, BIOSCIENCE, V5…	52	1	1	7	7	PENSOFT PUBL	SOFIA	GEO MILEV STR 13A, SOFIA, 1111, BULGARIA	1314-6947	1314-3301	NAT CONSERV-BULGARIA	Nat. Conserv.-Bulgaria		2015		41	60	10.3897/natureconservation.11.4438	20	Biodiversity Conservation	Biodiversity & Conservation	CO8VB	WOS:000359449200005				11					SI
	J	Arab, A|Courter, JR	Arab, Ali|Courter, Jason R.	Spatio-temporal Trend Analysis of Spring Arrival Data for Migratory Birds	COMMUNICATIONS IN STATISTICS-SIMULATION AND COMPUTATION	English	Article	Bird migration; Climate change; Hierarchical Bayesian models; Markov chain Monte Carlo; Spatio-temporal analysis	NORTH-ATLANTIC OSCILLATION; CLIMATE-CHANGE; CITIZEN SCIENCE; PHENOLOGY; H5N1; DYNAMICS; EUROPE; MODELS	There is increasing interest in spatio-temporal analysis of environmental and ecological responses to changes in the climate due to the recent concerns about climate change. In this work, we propose a spatio-temporal modeling framework for analyzing environmental and ecological data while accounting for spatial and temporal structure, as well as climate effects. As an example, we consider data on…	[Arab, Ali] Georgetown Univ, Dept Math & Stat, Washington, DC 20057 USA.|[Courter, Jason R.] Taylor Univ, Randall Environm Sci Ctr, Dept Earth & Environm Sci, Upland, IN USA.	Arab, A (reprint author), Georgetown Univ, Dept Math & Stat, 37th & O St, Washington, DC 20057 USA.	aa577@georgetown.edu	Alerstam T., 1990, BIRD MIGRATION|CASELLA G, 1992, AM STAT, V46, P167, DOI 10.2307/2685208|GELFAND AE, 1990, J AM STAT ASSOC, V85, P398, DOI 10.2307/2289776|Spiegelhalter DJ, 2002, J ROY STAT SOC B, V64, P583, DOI 10.1111/1467-9868.00353|Walther GR, 2002, NATURE, V416, P389, DOI 10.1038/416389a|Dickinson JL, 2010, ANNU REV ECOL EVOL S, V41, P149, DOI 10.1146/annurev-ecolsys-102209-144636|Clark JS…	43	0	0	5	5	TAYLOR & FRANCIS INC	PHILADELPHIA	530 WALNUT STREET, STE 850, PHILADELPHIA, PA 19106 USA	0361-0918	1532-4141	COMMUN STAT-SIMUL C	Commun. Stat.-Simul. Comput.		2015	44	2535	2547	10.1080/03610918.2013.809100	13	Statistics & Probability	Mathematics	CM2NF	WOS:000357516600005		Georgetown University	This work was partially supported by a Georgetown University Junior Faculty Fellowship during Spring 2011 and travel support was provided by a Georgetown University Environmental Initiative grant.	10					SI
	J	Watkins, C|Westphal, LM|Gobster, PH|Vining, J|Wali, A|Tudor, M	Watkins, Cristy|Westphal, Lynne M.|Gobster, Paul H.|Vining, Joanne|Wali, Alaka|Tudor, Madeleine	Shared Principles of Restoration Practice in the Chicago Wilderness Region	HUMAN ECOLOGY REVIEW	English	Article	ADICO; Chicago Wilderness; ecological restoration; institutional statements	ECOLOGICAL RESTORATION; INSTITUTIONAL ANALYSIS; DEVELOPMENT FRAMEWORK; LOCAL ENFORCEMENT; FOREST MANAGEMENT; GRAMMAR; RULES; KNOWLEDGE; GOALS; KEY	We describe the rules, norms, and strategies (institutional statements) that characterize ecological restoration across 10 organizations in the Chicago Wilderness region. Our use of Ostrom's IAD ADICO grammar tool is novel in both context (non-extractive resource management) and data type (qualitative interviews). Results suggest that, in contrast to a focus on rules in the literature, restoratio…	[Watkins, Cristy] Univ Michigan, Int Forestry Resources & Inst Program, Ann Arbor, MI 48109 USA.|[Westphal, Lynne M.; Gobster, Paul H.] US Forest Serv, USDA, Evanston, IL 60201 USA.|[Vining, Joanne] Univ Illinois, Dept Nat Resources & Environm Sci NRES, Environm Psychol, Urbana, IL 61801 USA.|[Wali, Alaka] Field Museum, North Amer Anthropol, Chicago, IL USA.|[Tudor, Madeleine] Field Museum, Sci A…	Westphal, LM (reprint author), US Forest Serv, USDA, Evanston, IL 60201 USA.	lwestphal@fs.fed.us	CRAWFORD SES, 1995, AM POLIT SCI REV, V89, P582, DOI 10.2307/2082975|Ehrenfeld JG, 2000, RESTOR ECOL, V8, P2, DOI 10.1046/j.1526-100x.2000.80002.x|Ostrom E, 2007, P NATL ACAD SCI USA, V104, P15181, DOI 10.1073/pnas.0702288104|Ostrom E, 2011, POLICY STUD J, V39, P7, DOI 10.1111/j.1541-0072.2010.00394.x|Imperial MT, 1999, ENVIRON MANAGE, V24, P449, DOI 10.1007/s002679900246|Berkes F, 2000, ECOL APP…	49	0	0	3	3	SOC HUMAN ECOLOGY	BAR HARBOR	105 EDEN ST, BAR HARBOR, ME 04609 USA	1074-4827		HUM ECOL REV	Hum. Ecol. Rev.		2015	21	155	177		23	Environmental Studies; Sociology	Environmental Sciences & Ecology; Sociology	CE9QV	WOS:000352179400007				1
	J	Supp, SR|La Sorte, FA|Cormier, TA|Lim, MCW|Powers, DR|Wethington, SM|Goetz, S|Graham, CH	Supp, S. R.|La Sorte, Frank A.|Cormier, Tina A.|Lim, Marisa C. W.|Powers, Donald R.|Wethington, Susan M.|Goetz, Scott|Graham, Catherine H.	Citizen-science data provides new insight into annual and seasonal variation in migration patterns	ECOSPHERE	English	Article	Archiolochus alexandri; Archilohus colubris; citizen science; eBird; hummingbird; looped migration; North America; seasonal migration; Selasphorus calliope; Selasphorus platycercus; Selasphorus rufus; temporal variation	MIGRANT RUFOUS HUMMINGBIRDS; LONG-DISTANCE MIGRANTS; CLIMATE-CHANGE; BIRD MIGRATION; SOUTHEASTERN ARIZONA; SPRING MIGRATION; AVIAN MIGRATION; TORPOR; PHENOLOGY; AUTUMN	Current rates of global environmental and climate change pose potential challenges for migratory species that must cope with or adapt to new conditions and different rates of change across broad spatial scales throughout their annual life cycle. North American migratory hummingbirds may be especially sensitive to changes in environment and climate due to their extremely small body size, high meta…	[Supp, S. R.; Lim, Marisa C. W.] SUNY Stony Brook, Dept Ecol & Evolut, Stony Brook, NY 11794 USA.|[La Sorte, Frank A.] Cornell Univ, Cornell Lab Ornithol, Ithaca, NY 14850 USA.|[Cormier, Tina A.; Goetz, Scott] Woods Hole Res Ctr, Falmouth, MA 02543 USA.|[Powers, Donald R.] George Fox Univ, Dept Biol, Newberg, OR 97132 USA.|[Wethington, Susan M.] Hummingbird Monitoring Network, Patagonia, AZ 85264…	Supp, SR (reprint author), Univ Wisconsin, Dept Geog, Madison, WI 53706 USA.	sarah@weecology.org	La Sorte FA, 2013, ECOLOGY, V94, P1839, DOI 10.1890/12-1768.1|Klaassen M, 2012, PHILOS T R SOC B, V367, P1719, DOI 10.1098/rstb.2012.0008|La Sorte FA, 2014, J BIOGEOGR, V41, P1685, DOI 10.1111/jbi.12328|Alerstam T, 2011, J ORNITHOL, V152, P5, DOI 10.1007/s10336-011-0694-1|Both C, 2010, P ROY SOC B-BIOL SCI, V277, P1259, DOI 10.1098/rspb.2009.1525|Dickinson JL, 2010, ANNU REV ECOL EVOL S, V41, P14…	67	0	0	27	31	ECOLOGICAL SOC AMER	WASHINGTON	1990 M STREET NW, STE 700, WASHINGTON, DC 20036 USA	2150-8925		ECOSPHERE	Ecosphere	JAN	2015	6			10.1890/ES14-00290.1	19	Ecology	Environmental Sciences & Ecology	CC5YG	WOS:000350440400015		NASA grant [NNX11AO28G]	We would like to thank D. Fink for sharing his code for the GAMM analysis. We would like to thank the Graham lab, the hummingbird NASA project collaborators, and the Cornell Laboratory of Ornithology eBird team for continued discussions on the data, statistical analysis and citizen science, and two anonymous reviewers. We especially thank all of the volunteer birders and banders whose data was us…	1	15		Supp, Sarah/0000-0002-0072-029X
	J	Lin, YP|Deng, DP|Lin, WC|Lemmens, R|Crossman, ND|Henle, K|Schmeller, DS	Lin, Yu-Pin|Deng, Dongpo|Lin, Wei-Chih|Lemmens, Rob|Crossman, Neville D.|Henle, Klaus|Schmeller, Dirk S.	Uncertainty analysis of crowd-sourced and professionally collected field data used in species distribution models of Taiwanese moths	BIOLOGICAL CONSERVATION	English	Article	Social media; Citizen science; Volunteer survey; Prediction of species distribution; Uncertainty; Natural language; Large-scale monitoring program	CITIZEN SCIENCE; ABSENCE DATA; HABITAT; TOOL; KNOWLEDGE; PATTERNS; EBIRD; MAP	The purposes of this study are to extract the names of species and places for a citizen-science monitoring program, to obtain crowd-sourced data of acceptable quality, and to assess the quality and the uncertainty of predictions based on crowd-sourced data and professional data. We used Natural Language Processing to extract names of species and places from text messages in a citizen science proj…	[Lin, Yu-Pin; Lin, Wei-Chih] Natl Taiwan Univ, Dept Bioenvironm Syst Engn, Taipei 10617, Taiwan.|[Deng, Dongpo; Lemmens, Rob] Univ Twente, Fac Geoinformat Sci & Earth Observat ITC, NL-7500 AE Enschede, Netherlands.|[Deng, Dongpo] Acad Sinica, Inst Informat Sci, Taipei 115, Taiwan.|[Crossman, Neville D.] CSIRO Land & Water Flagship, Glen Osmond, SA 5064, Australia.|[Henle, Klaus; Schmeller, Dirk S…	Lin, YP (reprint author), Natl Taiwan Univ, Dept Bioenvironm Syst Engn, 1,Sec 4,Roosevelt Rd, Taipei 10617, Taiwan.	yplin@ntu.edu.tw; dongpo.deng@gmail.com; b97602046@ntu.edu.tw; lemmens@itc.nl; Neville.Crossman@csiro.au; klaus.henle@ufz.de; dirk.schmeller@ufz.de	Aanensen DM, 2009, PLOS ONE, V4, DOI 10.1371/journal.pone.0006968|Viera AJ, 2005, FAM MED, V37, P360|Bonney R, 2009, BIOSCIENCE, V59, P977, DOI 10.1525/bio.2009.59.11.9|Barbet-Massin M, 2012, METHODS ECOL EVOL, V3, P327, DOI 10.1111/j.2041-210X.2011.00172.x|Guisan A, 2006, J APPL ECOL, V43, P386, DOI 10.1111/j.1365-2664.2006.01164.x|Elith J, 2009, ECOGRAPHY, V32, P66, DOI 10.1111/j.1600-0587.2008…	54	1	1	17	27	ELSEVIER SCI LTD	OXFORD	THE BOULEVARD, LANGFORD LANE, KIDLINGTON, OXFORD OX5 1GB, OXON, ENGLAND	0006-3207	1873-2917	BIOL CONSERV	Biol. Conserv.	JAN	2015	181	102	110	10.1016/j.biocon.2014.11.012	9	Biodiversity Conservation; Ecology; Environmental Sciences	Biodiversity & Conservation; Environmental Sciences & Ecology	CA2OK	WOS:000348747300013		Ministry of Science and Technology of the Republic of China, Taiwan [NSC 101-2923-I-002-001-MY2, 103-2119-M-002-012, NSC 101-2119-M-002-016]; EU BON by European Commission (EC) [308454]; EU SCALES by European Commission (EC) [226852]	The authors would like to thank the Ministry of Science and Technology of the Republic of China, Taiwan, for financially supporting this research under Contract Nos. NSC 101-2923-I-002-001-MY2, 103-2119-M-002-012, and NSC 101-2119-M-002-016. DSS and KH received funding through the projects EU BON and the SCALES. The EU BON (project no. 308454) and SCALES Projects (No. 226852) are funded by the Eu…					Schmeller, Dirk/F-4324-2010
	J	La Sorte, FA|Fink, D|Hochachka, WM|Aycrigg, JL|Rosenberg, KV|Rodewald, AD|Bruns, NE|Farnsworth, A|Sullivan, BL|Wood, C|Kelling, S	La Sorte, Frank A.|Fink, Daniel|Hochachka, Wesley M.|Aycrigg, Jocelyn L.|Rosenberg, Kenneth V.|Rodewald, Amanda D.|Bruns, Nicholas E.|Farnsworth, Andrew|Sullivan, Brian L.|Wood, Chris|Kelling, Steve	Documenting stewardship responsibilities across the annual cycle for birds on U.S. public lands	ECOLOGICAL APPLICATIONS	English	Article	birds; BLM; citizen science; cooperation; eBird; GAP status; North America; protected areas; seasonal migration; USFS	PROTECTED-AREA NETWORK; CLIMATE-CHANGE; PROJECTED IMPACTS; NEW-WORLD; CONSERVATION; BIODIVERSITY; MANAGEMENT; MIGRATION; MODELS; DIVERSITY	In the face of global environmental change, the importance of protected areas in biological management and conservation is expected to grow. Birds have played an important role as biological indicators of the effectiveness of protected areas, but with little consideration given to where species occur outside the breeding season. We estimated weekly probability of occurrence for 308 bird species t…	[La Sorte, Frank A.; Fink, Daniel; Hochachka, Wesley M.; Rosenberg, Kenneth V.; Rodewald, Amanda D.; Bruns, Nicholas E.; Farnsworth, Andrew; Sullivan, Brian L.; Wood, Chris; Kelling, Steve] Cornell Univ, Cornell Lab Ornithol, Ithaca, NY 14850 USA.|[Aycrigg, Jocelyn L.] Univ Idaho, Dept Fish & Wildlife Sci, Natl Gap Anal Program, Moscow, ID 83844 USA.	La Sorte, FA (reprint author), Cornell Univ, Cornell Lab Ornithol, Ithaca, NY 14850 USA.	fal42@cornell.edu	Agrawal A, 2000, ENVIRON CONSERV, V27, P326, DOI 10.1017/S0376892900000370|Albers HJ, 2008, RESOUR ENERGY ECON, V30, P492, DOI 10.1016/j.reseneeco.2008.04.001|Butchart SHM, 2010, SCIENCE, V328, P1164, DOI 10.1126/science.1187512|La Sorte FA, 2014, J BIOGEOGR, V41, P1685, DOI 10.1111/jbi.12328|Lodge DM, 2006, ECOL APPL, V16, P2035, DOI 10.1890/1051-0761(2006)016[2035:BIRFUP]2.0.CO;2|Rodrigues ASL,…	56	1	1	12	23	ECOLOGICAL SOC AMER	WASHINGTON	1990 M STREET NW, STE 700, WASHINGTON, DC 20036 USA	1051-0761	1939-5582	ECOL APPL	Ecol. Appl.	JAN	2015	25	39	51	10.1890/14-0702.1.sm	13	Ecology; Environmental Sciences	Environmental Sciences & Ecology	CA1JC	WOS:000348667900005		Leon Levy Foundation; Wolf Creek Foundation; National Science Foundation [IIS-1125098, IIS-1017793]	We thank T. Fredericks, J. Ward, and K. Webb for assistance with data acquisition and preparation, A. Dhondt, M. Iliff, and D. Winkler for valuable discussions, and two anonymous reviewers for constructive comments. We are grateful to the many eBird participants for their contributions. This work was funded by the Leon Levy Foundation, Wolf Creek Foundation, and the National Science Foundation (I…	1		26255356	Aycrigg, Jocelyn/0000-0002-6511-7985
	J	Zhang, YC|Yang, XH|Wang, HY|Wang, L|Luo, WT|Mo, HJ|van den Bosch, FC	Zhang, Youcai|Yang, Xiaohu|Wang, Huiyuan|Wang, Lei|Luo, Wentao|Mo, H. J.|van den Bosch, Frank C.	SPIN ALIGNMENTS OF SPIRAL GALAXIES WITHIN THE LARGE-SCALE STRUCTURE FROM SDSS DR7	ASTROPHYSICAL JOURNAL	English	Article	cosmology: observations; large-scale structure of universe; methods: statistical	DIGITAL SKY SURVEY; DARK-MATTER HALOES; TIDAL-TORQUE THEORY; ANGULAR-MOMENTUM; COSMIC WEB; DATA RELEASE; FILAMENTS; ORIENTATION; VOIDS; CLUSTERS	Using a sample of spiral galaxies selected from the Sloan Digital Sky Survey Data Release 7 and Galaxy Zoo 2, we investigate the alignment of spin axes of spiral galaxies with their surrounding large-scale structure, which is characterized by the large-scale tidal field reconstructed from the data using galaxy groups above a certain mass threshold. We find that the spin axes only have weak tenden…	[Zhang, Youcai; Yang, Xiaohu; Luo, Wentao] Shanghai Astron Observ, Key Lab Res Galaxies & Cosmol, Shanghai 200030, Peoples R China.|[Yang, Xiaohu] Shanghai Jiao Tong Univ, Ctr Astron & Astrophys, Shanghai 200240, Peoples R China.|[Wang, Huiyuan] Univ Sci & Technol China, Key Lab Res Galaxies & Cosmol, Hefei 230026, Anhui, Peoples R China.|[Wang, Huiyuan; Mo, H. J.] Univ Massachusetts, Dept Astron…	Zhang, YC (reprint author), Shanghai Astron Observ, Key Lab Res Galaxies & Cosmol, Nandan Rd 80, Shanghai 200030, Peoples R China.	yczhang@shao.ac.cn; xyang@sjtu.edu.cn	Abazajian KN, 2009, ASTROPHYS J SUPPL S, V182, P543, DOI 10.1088/0067-0049/182/2/543|Adelman-McCarthy JK, 2008, ASTROPHYS J SUPPL S, V175, P297, DOI 10.1086/524984|HAYNES MP, 1984, ASTRON J, V89, P758, DOI 10.1086/113573|Hahn O, 2007, MON NOT R ASTRON SOC, V375, P489, DOI 10.1111/j.1365-2966.2006.11318.x|Blanton MR, 2005, ASTRON J, V129, P2562, DOI 10.1086/429803|York DG, 2000, ASTRON J, V120, P1…	49	5	5	0	9	IOP PUBLISHING LTD	BRISTOL	TEMPLE CIRCUS, TEMPLE WAY, BRISTOL BS1 6BE, ENGLAND	0004-637X	1538-4357	ASTROPHYS J	Astrophys. J.	2015-01-01	2015	798			10.1088/0004-637X/798/1/17	8	Astronomy & Astrophysics	Astronomy & Astrophysics	AX9TO	WOS:000347245100017		973 Program [2015CB857002]; national science foundation of China [11203054, 11128306, 11121062, 11233005, 11073017]; Strategic Priority Research Program "The Emergence of Cosmological Structures" of the Chinese Academy of Sciences [XDB09000000]; Shanghai Committee of Science and Technology, China [12ZR1452800]; High Performance Computing Resource in the Core Facility for Advanced Research Computi…	This work is supported by the 973 Program (No. 2015CB857002), national science foundation of China (grant Nos. 11203054, 11128306, 11121062, 11233005, 11073017), NCET-11-0879, the Strategic Priority Research Program "The Emergence of Cosmological Structures" of the Chinese Academy of Sciences, grant No. XDB09000000 and the Shanghai Committee of Science and Technology, China (grant No. 12ZR1452800…	1	17		Wang, Huiyuan/0000-0002-4911-6990	Wang, Huiyuan/C-5473-2014
	J	Witze, A	Witze, Alexandra	ASTRONOMY Planet hunters plot a course	NATURE	English	News Item							2014, NATURE, V514, P414	1	0	0	7	7	NATURE PUBLISHING GROUP	LONDON	MACMILLAN BUILDING, 4 CRINAN ST, LONDON N1 9XW, ENGLAND	0028-0836	1476-4687	NATURE	Nature	2015-01-01	2015	517	8	9		2	Multidisciplinary Sciences	Science & Technology - Other Topics	AX8SI	WOS:000347178400005				7532		25557697
	J	Simmons, BD|Melvin, T|Lintott, C|Masters, KL|Willett, KW|Keel, WC|Smethurst, RJ|Cheung, E|Nichol, RC|Schawinski, K|Rutkowski, M|Kartaltepe, JS|Bell, EF|Casteels, KRV|Conselice, CJ|Almaini, O|Ferguson, HC|Fortson, L|Hartley, W|Kocevski, D|Koekemoer, AM|McIntosh, DH|Mortlock, A|Newman, JA|Ownsworth, J|Bamford, S|Dahlen, T|Faber, SM|Finkelstein, SL|Fontana, A|Galametz, A|Grogin, NA|Grutzbauch, R|Guo…	Simmons, B. D.|Melvin, Thomas|Lintott, Chris|Masters, Karen L.|Willett, Kyle W.|Keel, William C.|Smethurst, R. J.|Cheung, Edmond|Nichol, Robert C.|Schawinski, Kevin|Rutkowski, Michael|Kartaltepe, Jeyhan S.|Bell, Eric F.|Casteels, Kevin R. V.|Conselice, Christopher J.|Almaini, Omar|Ferguson, Henry C.|Fortson, Lucy|Hartley, William|Kocevski, Dale|Koekemoer, Anton M.|McIntosh, Daniel H.|Mortlock, Al…	Galaxy Zoo: CANDELS barred discs and bar fractions	MONTHLY NOTICES OF THE ROYAL ASTRONOMICAL SOCIETY	English	Article	galaxies: evolution; galaxies: general; galaxies: spiral; galaxies: structure	STAR-FORMING GALAXIES; ORIGINS DEEP SURVEY; DIGITAL-SKY-SURVEY; GOODS-SOUTH FIELD; EXTRAGALACTIC LEGACY SURVEY; YALE-CHILE MUSYC; 8 BILLION YEARS; LUMINOSITY FUNCTION; SPIRAL GALAXIES; ADVANCED CAMERA	The formation of bars in disc galaxies is a tracer of the dynamical maturity of the population. Previous studies have found that the incidence of bars in discs decreases from the local Universe to z similar to 1, and by z > 1 simulations predict that bar features in dynamically mature discs should be extremely rare. Here, we report the discovery of strong barred structures in massive disc galaxie…	[Simmons, B. D.; Lintott, Chris; Smethurst, R. J.; Haeussler, Boris] Oxford Astrophys, Oxford OX1 3RH, England.|[Melvin, Thomas; Masters, Karen L.; Nichol, Robert C.] Univ Portsmouth, Inst Cosmol & Gravitat, Portsmouth PO1 3FX, Hants, England.|[Lintott, Chris] Adler Planetarium, Chicago, IL 60605 USA.|[Masters, Karen L.; Nichol, Robert C.] Univ Southampton, Network Sch Phys & Astron, South East P…	Simmons, BD (reprint author), Oxford Astrophys, Denys Wilkinson Bldg,Keble Rd, Oxford OX1 3RH, England.	brooke.simmons@astro.ox.ac.uk	Abraham RG, 1996, MON NOT R ASTRON SOC, V279, pL47|Abraham RG, 1999, MON NOT R ASTRON SOC, V308, P569, DOI 10.1046/j.1365-8711.1999.02766.x|Aguerri JAL, 2009, ASTRON ASTROPHYS, V495, P491, DOI 10.1051/0004-6361:200810931|Tacconi LJ, 2010, NATURE, V463, P781, DOI 10.1038/nature08773|Gawiser E, 2006, ASTROPHYS J SUPPL S, V162, P1, DOI 10.1086/497644|Law DR, 2012, NATURE, V487, P338, DOI 10.1038/nat…	95	3	3	8	9	OXFORD UNIV PRESS	OXFORD	GREAT CLARENDON ST, OXFORD OX2 6DP, ENGLAND	0035-8711	1365-2966	MON NOT R ASTRON SOC	Mon. Not. Roy. Astron. Soc.	2015-12-21	2014	445	3466	3474	10.1093/mnras/stu1817	9	Astronomy & Astrophysics	Astronomy & Astrophysics	AX5JY	WOS:000346963300012		Science and Technology Facilities Council [ST/J500665/1, ST/K502236/1, ST/I001204/1]; Leverhulme Trust; UMN Grant-In-Aid programme; Swiss National Science Foundation [PP00P2_138979/1]; NASA [NAS5-26555]	We are grateful to the anonymous referee for helpful comments and suggestions which improved this manuscript. TOPCAT (Taylor 2005) and an OS X widget form of the JavaScript Cosmology Calculator (Wright 2006; Simpson et al. 2013) were used while preparing this paper. BDS gratefully acknowledges support from the Oxford Martin School, Worcester College and Balliol College, Oxford. TM acknowledges fu…	4			Smethurst, Rebecca/0000-0001-6417-7196; Koekemoer, Anton/0000-0002-6610-2048; Bamford, Steven/0000-0001-7821-7195	Koekemoer, Anton/F-8400-2014;
	J	Cosentino, BJ|Marsh, DM|Jones, KS|Apodaca, JJ|Bates, C|Beach, J|Beard, KH|Becklin, K|Bell, JM|Crockett, C|Fawson, G|Fjelsted, J|Forys, EA|Genet, KS|Grover, M|Holmes, J|Indeck, K|Karraker, NE|Kilpatrick, ES|Langen, TA|Mugel, SG|Molina, A|Vonesh, JR|Weaver, RJ|Willey, A	Cosentino, Bradley J.|Marsh, David M.|Jones, Kara S.|Apodaca, Joseph J.|Bates, Christopher|Beach, Jessica|Beard, Karen H.|Becklin, Kelsie|Bell, Jane Margaret|Crockett, Christopher|Fawson, George|Fjelsted, Jennifer|Forys, Elizabeth A.|Genet, Kristen S.|Grover, Melanie|Holmes, Jaimie|Indeck, Katherine|Karraker, Nancy E.|Kilpatrick, Eran S.|Langen, Tom A.|Mugel, Stephen G.|Molina, Alessandro|Vonesh,…	Citizen science reveals widespread negative effects of roads on amphibian distributions	BIOLOGICAL CONSERVATION	English	Article	Amphibian; Habitat loss; Habitat fragmentation; Landscape structure; Road traffic; Urbanization	HABITAT LOSS; LANDSCAPE COMPOSITION; BREEDING AMPHIBIANS; TERRESTRIAL HABITAT; SPECIES RICHNESS; DEICING SALT; WOOD FROGS; FRAGMENTATION; MORTALITY; METAPOPULATION	Landscape structure is important for shaping the abundance and distribution of amphibians, but prior studies of landscape effects have been species or ecosystem-specific. Using a large-scale, citizen science-generated database, we examined the effects of habitat composition, road disturbance, and habitat split (i.e. the isolation of wetland from forest by intervening land use) on the distribution…	[Cosentino, Bradley J.; Mugel, Stephen G.] Hobart & William Smith Coll, Dept Biol, Geneva, NY 14456 USA.|[Marsh, David M.] Washington & Lee Univ, Dept Biol, Lexington, VA 24450 USA.|[Jones, Kara S.] George Mason Univ, Dept Environm Sci & Policy, Fairfax, VA 22030 USA.|[Apodaca, Joseph J.; Bell, Jane Margaret; Grover, Melanie] Warren Wilson Coll, Dept Environm Studies & Biol, Asheville, NC 28815 U…	Cosentino, BJ (reprint author), Hobart & William Smith Coll, Dept Biol, Geneva, NY 14456 USA.	cosentino@hws.edu	Adams MJ, 2013, PLOS ONE, V8, DOI 10.1371/journal.pone.0064347|Semlitsch RD, 2003, CONSERV BIOL, V17, P1219, DOI 10.1046/j.1523-1739.2003.02177.x|Knutson MG, 1999, CONSERV BIOL, V13, P1437, DOI 10.1046/j.1523-1739.1999.98445.x|Porej D, 2004, BIOL CONSERV, V120, P399, DOI 10.1016/j.biocon.2004.03.015|Wake DB, 2008, P NATL ACAD SCI USA, V105, P11466, DOI 10.1073/pnas.0801921105|Pyron RA, 2013, P RO…	60	1	1	33	98	ELSEVIER SCI LTD	OXFORD	THE BOULEVARD, LANGFORD LANE, KIDLINGTON, OXFORD OX5 1GB, OXON, ENGLAND	0006-3207	1873-2917	BIOL CONSERV	Biol. Conserv.	DEC	2014	180	31	38	10.1016/j.biocon.2014.09.027	8	Biodiversity Conservation; Ecology; Environmental Sciences	Biodiversity & Conservation; Environmental Sciences & Ecology	AW3UO	WOS:000346211700004		NSF Transforming Undergraduate Education in Science Program (TUES)	We are grateful to Stephanie Hampton and the National Center for Ecological Analysis and Synthesis (NCEAS) for facilitating this project. Jim Regetz and Thomas Hetmank (NCEAS) provided essential technical support. Linda Weir (NAAMP) helped us understand NAAMP data and provided comments on an earlier draft of the manuscript, and we thank Marc Mazerolle for advice about model averaging. We thank st…				Vonesh, James/0000-0003-2481-9988	Beard, Karen/B-7177-2011; Vonesh, James/I-1573-2013
	J	Hartnett, JJ|Collins, JM|Baxter, MA|Chambers, DP	Hartnett, Justin J.|Collins, Jennifer M.|Baxter, Martin A.|Chambers, Don P.	Spatiotemporal Snowfall Trends in Central New York	JOURNAL OF APPLIED METEOROLOGY AND CLIMATOLOGY	English	Article		CONTIGUOUS UNITED-STATES; LAURENTIAN GREAT-LAKES; EFFECT SNOWSTORMS; WINTER WEATHER; CLIMATE-CHANGE; 20TH-CENTURY; VARIABILITY; FREQUENCY; MICHIGAN; RAINFALL	Central New York State, located at the intersection of the northeastern United States and the Great Lakes basin, is impacted by snowfall produced by lake-effect and non-lake-effect snowstorms. The purpose of this study is to determine the spatiotemporal patterns of snowfall in central New York and their possible underlying causes. Ninety-three Cooperative Observer Program stations are used in thi…	[Hartnett, Justin J.] Syracuse Univ, Dept Geog, Syracuse, NY 13244 USA.|[Collins, Jennifer M.] Univ S Florida, Sch Geosci, Tampa, FL USA.|[Baxter, Martin A.] Cent Michigan Univ, Dept Earth & Atmospher Sci, Mt Pleasant, MI 48859 USA.|[Chambers, Don P.] Univ S Florida, Coll Marine Sci, Tampa, FL USA.	Hartnett, JJ (reprint author), Syracuse Univ, 900 South Crouse Ave, Syracuse, NY 13244 USA.	jjhartne@syr.edu	Accadia C, 2003, WEATHER FORECAST, V18, P918, DOI 10.1175/1520-0434(2003)018<0918:SOPFSS>2.0.CO;2|Bard L, 2012, J APPL METEOROL CLIM, V51, P2038, DOI 10.1175/JAMC-D-12-064.1|Baxter MA, 2005, WEATHER FORECAST, V20, P729, DOI 10.1175/WAF856.1|BRAHAM RR, 1984, J CLIM APPL METEOROL, V23, P940, DOI 10.1175/1520-0450(1984)023<0940:QEOTEO>2.0.CO;2|Burnett AW, 2003, J CLIMATE, V16, P3535, DOI 10.1175/152…	33	0	0	13	13	AMER METEOROLOGICAL SOC	BOSTON	45 BEACON ST, BOSTON, MA 02108-3693 USA	1558-8424	1558-8432	J APPL METEOROL CLIM	J. Appl. Meteorol. Climatol.	DEC	2014	53	2685	2697	10.1175/JAMC-D-14-0084.1	13	Meteorology & Atmospheric Sciences	Meteorology & Atmospheric Sciences	AW4YU	WOS:000346284300004				12
	J	Gamble, AL|D'Rozario, AL|Bartlett, DJ|Williams, S|Bin, YS|Grunstein, RR|Marshall, NS	Gamble, Amanda L.|D'Rozario, Angela L.|Bartlett, Delwyn J.|Williams, Shaun|Bin, Yu Sun|Grunstein, Ronald R.|Marshall, Nathaniel S.	Adolescent Sleep Patterns and Night-Time Technology Use: Results of the Australian Broadcasting Corporation's Big Sleep Survey	PLOS ONE	English	Article		AMERICA-POLL; MEDIA USE; CHILDREN; TIME; DURATION; ASSOCIATION; DISORDERS; HEALTH; IMPACT; RISK	Introduction: Electronic devices in the bedroom are broadly linked with poor sleep in adolescents. This study investigated whether there is a dose-response relationship between use of electronic devices (computers, cellphones, televisions and radios) in bed prior to sleep and adolescent sleep patterns. Methods: Adolescents aged 11-17 yrs (n = 1,184; 67.6% female) completed an Australia-wide inter…	[Gamble, Amanda L.; D'Rozario, Angela L.; Bartlett, Delwyn J.; Williams, Shaun; Bin, Yu Sun; Grunstein, Ronald R.; Marshall, Nathaniel S.] Univ Sydney, NHMRC CIRUS, Sydney, NSW 2006, Australia.|[D'Rozario, Angela L.; Bartlett, Delwyn J.; Grunstein, Ronald R.; Marshall, Nathaniel S.] Woolcock Inst Med Res, Sleep & Circadian Res Grp, Sydney, NSW, Australia.|[Grunstein, Ronald R.] Royal Prince Alfre…	Marshall, NS (reprint author), Univ Sydney, NHMRC CIRUS, Sydney, NSW 2006, Australia.	nathaniel.marshall@sydney.edu.au	Dahl RE, 2002, J ADOLESCENT HEALTH, V31, P175, DOI 10.1016/S1054-139X(02)00506-2|Wittmann M, 2006, CHRONOBIOL INT, V23, P497, DOI 10.1080/07420520500545979|JOHNS MW, 1991, SLEEP, V14, P540|CARSKADON MA, 1993, SLEEP, V16, P258|Australian Bureau of Statistics ABS, 2006, SOC IND AR SEIFA TEC|Olds T, 2010, SLEEP MED REV, V14, P371, DOI 10.1016/j.smrv.2009.12.002|Cain N, 2010, SLEEP MED, V11, P735, DO…	32	1	1	21	26	PUBLIC LIBRARY SCIENCE	SAN FRANCISCO	1160 BATTERY STREET, STE 100, SAN FRANCISCO, CA 94111 USA	1932-6203		PLOS ONE	PLoS One	2015-11-12	2014	9			10.1371/journal.pone.0111700	9	Multidisciplinary Sciences	Science & Technology - Other Topics	CA8CP	WOS:000349144400030		NHMRC Centre for Integrated Research and Understanding of Sleep (CIRUS) at The University of Sydney [571421]; NHMRC Practitioner Fellowship [1022730]; NHMRC Dora Lush PhD Scholarship [633172]	ABC National Science Week Big Sleep Survey was supported by the NHMRC Centre for Integrated Research and Understanding of Sleep (CIRUS) at The University of Sydney providing personnel and expertise (NHMRC grant # 571421 to Prof Grunstein providing salary support to Drs Gamble, Williams, Marshall and Ms Bin). The Australian Broadcasting Corporation hosts National Science Week and this survey and p…	11	e111700	25390034
	J	Schmitt, JR|Agol, E|Deck, KM|Rogers, LA|Gazak, JZ|Fischer, DA|Wang, J|Holman, MJ|Jek, KJ|Margossian, C|Omohundro, MR|Winarski, T|Brewer, JM|Giguere, MJ|Lintott, C|Lynn, S|Parrish, M|Schawinski, K|Schwamb, ME|Simpson, R|Smith, AM	Schmitt, Joseph R.|Agol, Eric|Deck, Katherine M.|Rogers, Leslie A.|Gazak, J. Zachary|Fischer, Debra A.|Wang, Ji|Holman, Matthew J.|Jek, Kian J.|Margossian, Charles|Omohundro, Mark R.|Winarski, Troy|Brewer, John M.|Giguere, Matthew J.|Lintott, Chris|Lynn, Stuart|Parrish, Michael|Schawinski, Kevin|Schwamb, Megan E.|Simpson, Robert|Smith, Arfon M.	PLANET HUNTERS. VII. DISCOVERY OF A NEW LOW-MASS, LOW-DENSITY PLANET (PH3 C) ORBITING KEPLER-289 WITH MASS MEASUREMENTS OF TWO ADDITIONAL PLANETS (PH3 B AND D)	ASTROPHYSICAL JOURNAL	English	Article	Planets and satellites: detection; surveys	TRANSIT TIMING VARIATIONS; DIGITAL-SKY-SURVEY; 1ST 12 QUARTERS; DATA RELEASE; EXTRASOLAR PLANETS; ECLIPSING BINARIES; GIANT PLANET; ARCHIVE DATA; MISSION DATA; LIGHT-CURVE	We report the discovery of one newly confirmed planet (P = 66.06 days, R-P = 2.68 +/- 0.17 R-circle plus.) and mass determinations of two previously validated Kepler planets, Kepler-289 b (P = 34.55 days, R-P = 2.15 +/- 0.10 R-circle plus.) and Kepler-289-c (P = 125.85 days, R-P = 11.59 +/- 0.10 R-circle plus), through their transit timing variations (TTVs). We also exclude the possibility that t…	[Schmitt, Joseph R.; Fischer, Debra A.; Wang, Ji; Margossian, Charles; Brewer, John M.; Giguere, Matthew J.] Univ Washington, Dept Astron, Seattle, WA 98195 USA.|[Agol, Eric] MIT, Dept Phys, Cambridge, MA 02139 USA.|[Deck, Katherine M.] MIT, Kavli Inst Astrophys & Space Res, Cambridge, MA 02139 USA.|[Deck, Katherine M.] MIT, Dept Phys, Cambridge, MA 02139 USA.|[Rogers, Leslie A.] CALTECH, Dept As…	Schmitt, JR (reprint author), Yale Univ, Dept Astron, New Haven, CT 06511 USA.	joseph.schmitt@yale.edu	Abazajian KN, 2009, ASTROPHYS J SUPPL S, V182, P543, DOI 10.1088/0067-0049/182/2/543|Agol E, 2005, MON NOT R ASTRON SOC, V359, P567, DOI 10.1111/j.1365-2966.2005.08922.x|Aksnes K., 1988, LONG TERM DYNAMICAL, P125|Lissauer JJ, 2011, NATURE, V470, P53, DOI 10.1038/nature09760|Lintott CJ, 2008, MON NOT R ASTRON SOC, V389, P1179, DOI 10.1111/j.1365-2966.2008.13689.x|Dotter A, 2008, ASTROPHYS J SUPPL …	90	1	1	4	9	IOP PUBLISHING LTD	BRISTOL	TEMPLE CIRCUS, TEMPLE WAY, BRISTOL BS1 6BE, ENGLAND	0004-637X	1538-4357	ASTROPHYS J	Astrophys. J.	2015-11-10	2014	795			10.1088/0004-637X/795/2/167	13	Astronomy & Astrophysics	Astronomy & Astrophysics	AR8YT	WOS:000343857900066		NSF Career grant [AST 0645416]; NASA Astrobiology Institutes Virtual Planetary Laboratory - NASA [NNH05ZDA001C]; NASA Origins of Solar Systems [12-OSS12-0011]; NSF Graduate Research Fellowship; Yale University; NASA Supplemental Outreach Award [10-OUTRCH.210-0001]; NASA [ADAP12-0172, NAS 5-26555]; NASA through Space Telescope Science Institute [HF-51313]; Swiss National Science Foundation [PP00P2…	E.A. acknowledges funding by NSF Career grant AST 0645416; NASA Astrobiology Institutes Virtual Planetary Laboratory, supported by NASA under cooperative agreement NNH05ZDA001C; and NASA Origins of Solar Systems grant 12-OSS12-0011. K.M.D. acknowledges the support of an NSF Graduate Research Fellowship. D.F. acknowledges funding support for PlanetHunters. org from Yale University and support from…	2	167
	J	Ponciano, L|Brasileiro, F|Simpson, R|Smith, A	Ponciano, Lesandro|Brasileiro, Francisco|Simpson, Robert|Smith, Arfon	Volunteers' Engagement in Human Computation for Astronomy Projects	COMPUTING IN SCIENCE & ENGINEERING	English	Article			The results of a volunteer engagement characterization study in two astronomy projects (Galaxy Zoo and the Milky Way Project) found a diversity of engagement patterns in terms of frequency, daily productivity, duration of typical contribution session, and the amount of time devoted to the project.	[Ponciano, Lesandro; Brasileiro, Francisco] Univ Fed Campina Grande, Dept Comp Sci, Campina Grande, PB, Brazil.|[Simpson, Robert] Univ Oxford, Oxford OX1 2JD, England.|[Smith, Arfon] GitHub, San Francisco, CA USA.	Ponciano, L (reprint author), Univ Fed Campina Grande, Dept Comp Sci, Campina Grande, PB, Brazil.	lesandrop@lsd.ufcg.edu.br; fubica@computacao.ufcg.edu.br; rob@zooniverse.org; arfon@github.com	Lintott CJ, 2008, MON NOT R ASTRON SOC, V389, P1179, DOI 10.1111/j.1365-2966.2008.13689.x|Anderson DP, 2002, COMMUN ACM, V45, P56, DOI 10.1145/581571.581573|Arlitt M., 2000, Performance Evaluation Review, V28|Ipeirotis P. G., 2010, XRDS, V17, P16, DOI DOI 10.1145/1869086.1869094|Mehrzadi D., 2012, P 5 ANN INT SYST STO|Mendez B.J., 2005, B AM ASTRONOMICAL SO, V37, P1265|Quinn Alexander J., 2011, P…	12	2	2	1	4	IEEE COMPUTER SOC	LOS ALAMITOS	10662 LOS VAQUEROS CIRCLE, PO BOX 3014, LOS ALAMITOS, CA 90720-1314 USA	1521-9615	1558-366X	COMPUT SCI ENG	Comput. Sci. Eng.	NOV-DEC	2014	16	52	59		8	Computer Science, Interdisciplinary Applications	Computer Science	AT3OM	WOS:000344843900007				6			Ponciano, Lesandro/0000-0002-5724-0094	Ponciano, Lesandro/O-7151-2014
	J	Barbet-Massin, M|Jetz, W	Barbet-Massin, Morgane|Jetz, Walter	A 40-year, continent-wide, multispecies assessment of relevant climate predictors for species distribution modelling	DIVERSITY AND DISTRIBUTIONS	English	Article	Bioclim variables; model transferability; spatial evaluation; species distribution models; temporal evaluation; variable importance	CONTERMINOUS UNITED-STATES; EUROPEAN BREEDING BIRDS; LAND-COVER; POTENTIAL IMPACTS; PSEUDO-ABSENCES; ENVELOPE MODELS; NICHE MODELS; PERFORMANCE; IMPROVE; RANGE	AimSpecies distribution models (SDMs) are increasingly used to address numerous questions in ecology, biogeography, conservation biology and evolution. Surprisingly, the crucial step of selecting the most relevant variables has received little attention, despite its direct implications for model transferability and uncertainty. Here, we aim to address this with a continent-wide, evaluation of whi…	[Barbet-Massin, Morgane; Jetz, Walter] Yale Univ, Dept Ecol & Evolutionary Biol, New Haven, CT 06520 USA.|[Barbet-Massin, Morgane] UPMC, Ctr Ecol & Sci Conservat, CNRS, MNHN,UMR 7204, Paris, France.	Barbet-Massin, M (reprint author), Yale Univ, Dept Ecol & Evolutionary Biol, 165 Prospect St, New Haven, CT 06520 USA.	morgane.barbet-massin@yale.edu	Anderson RP, 2010, J BIOGEOGR, V37, P1378, DOI 10.1111/j.1365-2699.2010.02290.x|Menke SB, 2009, GLOBAL ECOL BIOGEOGR, V18, P50, DOI 10.1111/j.1466-8238.2008.00420.x|Guisan A, 2000, ECOL MODEL, V135, P147, DOI 10.1016/S0304-3800(00)00354-9|Marmion M, 2009, DIVERS DISTRIB, V15, P59, DOI 10.1111/j.1472-4642.2008.00491.x|Araujo MB, 2012, ECOLOGY, V93, P1527, DOI 10.1890/11-1930.1|Dormann CF, 2013, EC…	67	4	4	17	49	WILEY-BLACKWELL	HOBOKEN	111 RIVER ST, HOBOKEN 07030-5774, NJ USA	1366-9516	1472-4642	DIVERS DISTRIB	Divers. Distrib.	NOV	2014	20	1285	1295	10.1111/ddi.12229	11	Biodiversity Conservation; Ecology	Biodiversity & Conservation; Environmental Sciences & Ecology	AR9BF	WOS:000343865200006		EU FP7-PEOPLE-IOF project BIRDCHANGE; NSF [DBI 0960550, DEB 1026764]; NASA [NNX11AP72G]	We are grateful to Adam M. Wilson, Phoebe L. Zarnetske and Ben S. Carlson as well as all members of the Jetz lab, two anonymous referees and Risto Heikkinen for their constructive comments on this manuscript. We also acknowledge the contributions of the thousands of U.S. BBS participants who survey routes annually, as well as the work of dedicated USGS and CWS scientists and managers. The work be…	11				Jetz, Walter/F-3564-2010
	J	La Sorte, FA|Tingley, MW|Hurlbert, AH	La Sorte, Frank A.|Tingley, Morgan W.|Hurlbert, Allen H.	The role of urban and agricultural areas during avian migration: an assessment of within-year temporal turnover	GLOBAL ECOLOGY AND BIOGEOGRAPHY	English	Article	Agriculture; beta diversity; biotic homogenization; eBird; land-use change; North America; seasonal avian migration; species richness; temporal turnover; urbanization	GLOBAL LAND-USE; LONG-DISTANCE MIGRANTS; BETA-DIVERSITY; COMMUNITY DYNAMICS; SPRING MIGRATION; CLIMATE-CHANGE; MASS CHANGES; HABITAT USE; STOPOVER; BIRDS	AimMigration is often identified as the most vulnerable period in the annual cycle for birds, and land-use change is likely to have altered how avian populations are regulated during migration events. However, the consequences of land-use change for avian diversity are typically assessed based on annual surveys of breeding communities with little consideration given to migration or other phases o…	[La Sorte, Frank A.] Cornell Univ, Cornell Lab Ornithol, Ithaca, NY 14850 USA.|[Tingley, Morgan W.] Princeton Univ, Woodrow Wilson Sch, Princeton, NJ 08544 USA.|[Hurlbert, Allen H.] Univ N Carolina, Dept Biol, Chapel Hill, NC 27599 USA.|[Hurlbert, Allen H.] Univ N Carolina, Curriculum Environm & Ecol, Chapel Hill, NC 27599 USA.	La Sorte, FA (reprint author), Cornell Univ, Cornell Lab Ornithol, 159 Sapsucker Woods Rd, Ithaca, NY 14850 USA.	fal42@cornell.edu	Alerstam T., 1990, P331|McKinney ML, 1999, TRENDS ECOL EVOL, V14, P450, DOI 10.1016/S0169-5347(99)01679-1|Klaassen M, 2012, PHILOS T R SOC B, V367, P1719, DOI 10.1098/rstb.2012.0008|Ricklefs RE, 2008, AM NAT, V172, P741, DOI 10.1086/593002|La Sorte FA, 2014, J BIOGEOGR, V41, P1685, DOI 10.1111/jbi.12328|Foley JA, 2005, SCIENCE, V309, P570, DOI 10.1126/science.1111772|Vitousek PM, 1997, SCIENCE, V…	66	1	1	26	72	WILEY-BLACKWELL	HOBOKEN	111 RIVER ST, HOBOKEN 07030-5774, NJ USA	1466-822X	1466-8238	GLOBAL ECOL BIOGEOGR	Glob. Ecol. Biogeogr.	NOV	2014	23	1225	1234	10.1111/geb.12199	10	Ecology; Geography, Physical	Environmental Sciences & Ecology; Physical Geography	AR6ZU	WOS:000343730600008		Leon Levy Foundation; Wolf Creek Foundation; National Science Foundation [IIS-1125098, IIS-1017793]; David H. Smith Fellowship	We thank A. Dhondt, D. Fink, W. Hochachka, M. Iliff, S. Kelling, A. Rodewald, K. Rosenberg, B. Sullivan, D. Winkler and C. Wood for valuable discussions. We thank the eBird participants for their contributions to the database. Work by F.A.L. was supported by the Leon Levy Foundation, Wolf Creek Foundation and the National Science Foundation (IIS-1125098 and IIS-1017793). M.W.T. was supported by a…	11			Tingley, Morgan/0000-0002-1477-2218	Tingley, Morgan/F-8519-2011
	J	Zellner, M|Watkins, C|Massey, D|Westphal, L|Brooks, J|Ross, K	Zellner, Moira|Watkins, Cristy|Massey, Dean|Westphal, Lynne|Brooks, Jeremy|Ross, Kristen	Advancing Collective Decision-Making Theory with Integrated Agent-Based Modeling and Ethnographic Data Analysis: An Example in Ecological Restoration	JASSS-THE JOURNAL OF ARTIFICIAL SOCIETIES AND SOCIAL SIMULATION	English	Article	Collective Decision-Making; Ethnographic Data; Ecological Restoration; Empirical Modeling	GROUP-PERFORMANCE; EMERGENCE; COMMUNITY; KNOWLEDGE; SYSTEMS; ADVICE	Ecological restoration actions generally result from collective decision-making processes and can involve diverse, at times contentious, views. As such, it is critical to understand these processes and the factors that might influence the resolution of diverse perspectives into a set of coordinated actions. This paper describes the adaptation and calibration of a stylized collective decision-maki…				AGAR M., 2005, JASSS-J ARTIF SOC S, V8, P4|Agar M, 2003, JASSS-J ARTIF SOC S, V6, P8|Agar M, 2004, HUM ORGAN, V63, P411|Agar MH, 2004, QUAL HEALTH RES, V14, P100, DOI 10.1177/1049732303259865|Altaweel M, 2010, JASSS-J ARTIF SOC S, V13|Kerr NL, 2004, ANNU REV PSYCHOL, V55, P623, DOI 10.1146/annurev.psych.55.090902.142009|Budescu DV, 2003, ORGAN BEHAV HUM DEC, V90, P178, DOI 10.1016/S0749-5978(02)0…	44	0	0	1	3	J A S S S	GUILDFORD	UNIV SURREY, DEPT SOCIOLOGY, GUILDFORD GU2 7XH, SURREY, ENGLAND	1460-7425		JASSS-J ARTIF SOC S	JASSS	OCT 31	2014	17				21	Social Sciences, Interdisciplinary	Social Sciences - Other Topics	AW3IX	WOS:000346180800013				4	11
	J	Germanov, ES|Marshall, AD	Germanov, Elitza S.|Marshall, Andrea D.	Running the Gauntlet: Regional Movement Patterns of Manta alfredi through a Complex of Parks and Fisheries	PLOS ONE	English	Article		PHOTOGRAPHIC IDENTIFICATION; EASTERN AUSTRALIA; RAYS; INDONESIA; MOBULIDAE; AFFINITY; BIOLOGY; ECOLOGY; KREFFT; SHARKS	Manta rays (Genus Manta) are economically important for fisheries and tourism in Indonesia. These species have been listed by the International Union for the Conservation of Nature Red List as Vulnerable to extinction; therefore, human exploitation of manta rays must be regulated. A better understanding of the habitat use and movement patterns of manta rays in Indonesia is needed in order to empl…	[Germanov, Elitza S.; Marshall, Andrea D.] Marine Megafauna Fdn, Truckee, CA 96161 USA.	Germanov, ES (reprint author), Marine Megafauna Fdn, Truckee, CA 96161 USA.	germanov@dal.ca	Anderson RC, 2011, FISH OCEANOGR, V20, P104, DOI 10.1111/j.1365-2419.2011.00571.x|Marshall AD, 2012, J FISH BIOL, V80, P1361, DOI 10.1111/j.1095-8649.2012.03244.x|Bonney R, 2009, BIOSCIENCE, V59, P977, DOI 10.1525/bio.2009.59.11.9|Couturier LIE, 2011, MAR FRESHWATER RES, V62, P628, DOI 10.1071/MF10148|Couturier LIE, 2014, CORAL REEFS, V33, P329, DOI 10.1007/s00338-014-1126-5|Couturier LIE, 2012, …	27	1	1	13	17	PUBLIC LIBRARY SCIENCE	SAN FRANCISCO	1160 BATTERY STREET, STE 100, SAN FRANCISCO, CA 94111 USA	1932-6203		PLOS ONE	PLoS One	OCT 22	2014	9			10.1371/journal.pone.0110071	9	Multidisciplinary Sciences	Science & Technology - Other Topics	AR6DY	WOS:000343674800023		development of 'Manta Matcher'	We are indebted to H. Mitchell and P. Bassett for their tremendous contribution enabling this project. We are thankful to G. Winstanley for his support regarding 'Manta Matcher'. We are grateful to the numerous citizen scientists, dive industry professionals and dive operators who have enabled this large-scale data collection. In particular, we would like to acknowledge D. Arriaga, J. Arriaga, T.…	10	e110071	25337865
	J	La Sorte, FA|Fink, D|Hochachka, WM|DeLong, JP|Kelling, S	La Sorte, Frank A.|Fink, Daniel|Hochachka, Wesley M.|DeLong, John P.|Kelling, Steve	Spring phenology of ecological productivity contributes to the use of looped migration strategies by birds	PROCEEDINGS OF THE ROYAL SOCIETY B-BIOLOGICAL SCIENCES	English	Article	eBird; ecological productivity; green-wave hypothesis; looped migration; migration flyway; seasonal bird migration	CLIMATE-CHANGE; VEGETATION INDEXES; HABITAT QUALITY; BREEDING BIRDS; GREEN WAVE; AUTUMN; GEESE; MODIS; PRECIPITATION; SEASONALITY	Migration is a common strategy used by birds that breed in seasonal environments. The patterns and determinants of migration routes, however, remain poorly understood. Recent empirical analyses have demonstrated that the locations of two North America migration flyways (eastern and western) shift seasonally, reflecting the influence of looped migration strategies. For the eastern but not western …	[La Sorte, Frank A.; Fink, Daniel; Hochachka, Wesley M.; Kelling, Steve] Cornell Univ, Cornell Lab Ornithol, Ithaca, NY 14850 USA.|[DeLong, John P.] Univ Nebraska, Sch Biol Sci, Lincoln, NE 68588 USA.	La Sorte, FA (reprint author), Cornell Univ, Cornell Lab Ornithol, Ithaca, NY 14850 USA.	fal42@cornell.edu	Adams DK, 1997, B AM METEOROL SOC, V78, P2197, DOI 10.1175/1520-0477(1997)078<2197:TNAM>2.0.CO;2|La Sorte FA, 2013, ECOLOGY, V94, P1839, DOI 10.1890/12-1768.1|Ovaskainen O, 2013, P NATL ACAD SCI USA, V110, P13434, DOI 10.1073/pnas.1305533110|La Sorte FA, 2014, J BIOGEOGR, V41, P1685, DOI 10.1111/jbi.12328|Norris DR, 2007, CONDOR, V109, P535|Huete A, 2002, REMOTE SENS ENVIRON, V83, P195, DOI 10.10…	60	1	1	12	75	ROYAL SOC	LONDON	6-9 CARLTON HOUSE TERRACE, LONDON SW1Y 5AG, ENGLAND	0962-8452	1471-2954	P ROY SOC B-BIOL SCI	Proc. R. Soc. B-Biol. Sci.	OCT 22	2014	281			10.1098/rspb.2014.0984	9	Biology; Ecology; Evolutionary Biology	Life Sciences & Biomedicine - Other Topics; Environmental Sciences & Ecology; Evolutionary Biology	AO7VI	WOS:000341560300003		Leon Levy Foundation; Wolf Creek Foundation; National Science Foundation [IIS-1125098, IIS-1017793]	This work was funded by the Leon Levy Foundation, Wolf Creek Foundation and the National Science Foundation (IIS-1125098 and IIS-1017793), with computing support from CNS-1059284, OCI-1053575 and DEB-110008.	1793	UNSP 20140984
	J	Pharoah, PD	Pharoah, Paul D.	Cell Slider: Using crowd sourcing for the scoring of molecular pathology	CANCER RESEARCH	English	Meeting Abstract				[Pharoah, Paul D.] Univ Cambridge, Cambridge, England.				0	0	0	0	0	AMER ASSOC CANCER RESEARCH	PHILADELPHIA	615 CHESTNUT ST, 17TH FLOOR, PHILADELPHIA, PA 19106-4404 USA	0008-5472	1538-7445	CANCER RES	Cancer Res.	OCT 1	2014	74			10.1158/1538-7445.AM2014-303	2	Oncology	Oncology	CB8UN	WOS:000349906904272				19
	J	Kuminski, E|George, J|Wallin, J|Shamir, L	Kuminski, Evan|George, Joe|Wallin, John|Shamir, Lior	Combining Human and Machine Learning for Morphological Analysis of Galaxy Images	PUBLICATIONS OF THE ASTRONOMICAL SOCIETY OF THE PACIFIC	English	Article		DIGITAL-SKY-SURVEY; AUTOMATIC DETECTION; DATA RELEASE; ZOO; CLASSIFICATIONS; SELECTION; CATALOG; PAIRS; DUST	The increasing importance of digital sky surveys collecting many millions of galaxy images has reinforced the need for robust methods that can perform morphological analysis of large galaxy image databases. Citizen science initiatives such as Galaxy Zoo showed that large data sets of galaxy images can be analyzed effectively by nonscientist volunteers, but since databases generated by robotic tel…	[Kuminski, Evan; George, Joe; Shamir, Lior] Lawrence Technol Univ, Southfield, MI 48075 USA.|[Wallin, John] Middle Tennessee State Univ, Murfreesboro, TN 37130 USA.	Kuminski, E (reprint author), Lawrence Technol Univ, 21000 W Ten Mile Rd, Southfield, MI 48075 USA.	ekuminski@ltu.edu; jgeorge@ltu.edu; john.wallin@mtsu.edu; lshamir@mtu.edu	Abraham RG, 2003, ASTROPHYS J, V588, P218, DOI 10.1086/373919|Orlov N, 2008, PATTERN RECOGN LETT, V29, P1684, DOI 10.1016/j.patrec.2008.04.013|Lintott CJ, 2008, MON NOT R ASTRON SOC, V389, P1179, DOI 10.1111/j.1365-2966.2008.13689.x|Lintott C, 2011, MON NOT R ASTRON SOC, V410, P166, DOI 10.1111/j.1365-2966.2010.17432.x|Shamir L, 2009, IEEE T BIO-MED ENG, V56, P407, DOI 10.1109/TBME.2008.2006025|Y…	35	1	1	5	8	UNIV CHICAGO PRESS	CHICAGO	1427 E 60TH ST, CHICAGO, IL 60637-2954 USA	0004-6280	1538-3873	PUBL ASTRON SOC PAC	Publ. Astron. Soc. Pac.	OCT	2014	126	959	967		9	Astronomy & Astrophysics	Astronomy & Astrophysics	AT1WD	WOS:000344720900007				944
	J	Weir, LA|Royle, JA|Gazenski, KD|Villena, O	Weir, Linda A.|Royle, J. Andrew|Gazenski, Kimberly D.|Villena, Oswaldo	NORTHEAST REGIONAL AND STATE TRENDS IN ANURAN OCCUPANCY FROM CALLING SURVEY DATA (2001-2011) FROM THE NORTH AMERICAN AMPHIBIAN MONITORING PROGRAM	HERPETOLOGICAL CONSERVATION AND BIOLOGY	English	Article	amphibian monitoring; calling survey; occupancy modeling; occupancy trends	ESTIMATING SITE OCCUPANCY; BREEDING BIRD SURVEY; SPECIES OCCURRENCE; OBSERVATION ERROR; POPULATION-CHANGE; MODELS; BIAS	We present the first regional trends in anuran occupancy from North American Amphibian Monitoring Program (NAAMP) data from 11 northeastern states using 11 years of data. NAAMP is a long-term monitoring program where observers collect data at assigned random roadside routes using a calling survey technique. We assessed occupancy trends for 17 species. Eight species had regional trends whose 95% p…	[Weir, Linda A.; Royle, J. Andrew; Villena, Oswaldo] US Geol Survey, Patuxent Wildlife Res Ctr, Laurel, MD 20708 USA.|[Gazenski, Kimberly D.] IAP World Serv, Patuxent Wildlife Res Ctr, Laurel, MD 20708 USA.	Weir, LA (reprint author), US Geol Survey, Patuxent Wildlife Res Ctr, 12100 Beech Forest Rd, Laurel, MD 20708 USA.	lweir@usgs.gov	Adams MJ, 2013, PLOS ONE, V8, DOI 10.1371/journal.pone.0064347|Miller DA, 2011, ECOLOGY, V92, P1422, DOI 10.1890/10-1396.1|MacKenzie DI, 2003, ECOLOGY, V84, P2200, DOI 10.1890/02-3090|MacKenzie DI, 2002, ECOLOGY, V83, P2248, DOI 10.2307/3072056|Brooks SP, 1998, J COMPUT GRAPH STAT, V7, P434, DOI 10.2307/1390675|Sauer JR, 2003, J WILDLIFE MANAGE, V67, P372, DOI 10.2307/3802778|ROBBINS CS, 1989, P …	37	1	2	10	14	HERPETOLOGICAL CONSERVATION & BIOLOGY	CORVALLIS	C/O R BRUCE BURY, USGS FOREST & RANGELAND, CORVALLIS, OR 00000 USA	2151-0733	1931-7603	HERPETOL CONSERV BIO	Herpetol. Conserv. Biol.	OCT	2014	9	223	245		23	Zoology	Zoology	AR2FG	WOS:000343398400001		North East Association of Fish and Wildlife Agencies [2010-04]; U.S. Geological Survey; State and Tribal Wildlife Grants Program	We thank all NAAMP observers and coordinators for their time and effort, which makes the NAAMP survey possible. We also thank the following people for technical assistance: Kinard Boone, Jang Byun, Brian DeMuth, Allison Sussman, and Mark Wimer. The preparation of this manuscript was partly supported by Regional Conservation Needs Grant (RNC Grant #2010-04) awarded by the North East Association of…	2
	J	Pidgeon, AM|Flather, CH|Radeloff, VC|Lepczyk, CA|Keuler, NS|Wood, EM|Stewart, SI|Hammer, RB	Pidgeon, Anna M.|Flather, Curtis H.|Radeloff, Volker C.|Lepczyk, Christopher A.|Keuler, Nicholas S.|Wood, Eric M.|Stewart, Susan I.|Hammer, Roger B.	Systematic Temporal Patterns in the Relationship Between Housing Development and Forest Bird Biodiversity	CONSERVATION BIOLOGY	English	Article	animals; birds; forest; functional groups; housing; North America; temporal pattern; woodland	RESIDENTIAL DENSITY PATTERNS; PLANT-SPECIES RICHNESS; UNITED-STATES; LANDSCAPE FRAGMENTATION; EXURBAN DEVELOPMENT; DEMOGRAPHIC-TRENDS; NORTHERN WISCONSIN; HUMAN-POPULATION; NEW-ENGLAND; CONSERVATION	As people encroach increasingly on natural areas, one question is how this affects avian biodiversity. The answer to this is partly scale-dependent. At broad scales, human populations and biodiversity concentrate in the same areas and are positively associated, but at local scales people and biodiversity are negatively associated with biodiversity. We investigated whether there is also a systemat…	[Pidgeon, Anna M.; Radeloff, Volker C.; Wood, Eric M.] Univ Wisconsin, Dept Forest & Wildlife Ecol, SILVIS Lab, Madison, WI 53706 USA.|[Flather, Curtis H.] US Forest Serv, USDA, Rocky Mt Res Stn, Ft Collins, CO 80526 USA.|[Lepczyk, Christopher A.] Univ Hawaii Manoa, Dept Nat Resources & Environm Management, Honolulu, HI 96822 USA.|[Keuler, Nicholas S.] Univ Wisconsin, Dept Stat, Madison, WI 53706…	Pidgeon, AM (reprint author), Univ Wisconsin, Dept Forest & Wildlife Ecol, SILVIS Lab, Madison, WI 53706 USA.	apidgeon@wisc.edu	Albright TP, 2011, REMOTE SENS ENVIRON, V115, P245, DOI 10.1016/j.rse.2010.08.024|McKinney ML, 1999, TRENDS ECOL EVOL, V14, P450, DOI 10.1016/S0169-5347(99)01679-1|Cincotta RP, 2000, NATURE, V404, P990, DOI 10.1038/35010105|Balmford A, 2001, SCIENCE, V291, P2616, DOI 10.1126/science.291.5513.2616|CONNELL JH, 1978, SCIENCE, V199, P1302, DOI 10.1126/science.199.4335.1302|Ferraz G, 2007, SCIENCE, V3…	52	2	2	11	34	WILEY-BLACKWELL	HOBOKEN	111 RIVER ST, HOBOKEN 07030-5774, NJ USA	0888-8892	1523-1739	CONSERV BIOL	Conserv. Biol.	OCT	2014	28	1291	1301	10.1111/cobi.12291	11	Biodiversity Conservation; Ecology; Environmental Sciences	Biodiversity & Conservation; Environmental Sciences & Ecology	AQ3DH	WOS:000342668700019		USFS RPA program and Northern Research Station; NASA's Biodiversity program; NASA's Ecological Forecasting program; Oregon State University; University of Wisconsin-Madison	We thank P.D. Culbert and E. Duerr for technical assistance. We appreciate support from the USFS RPA program and Northern Research Station, NASA's Biodiversity and Ecological Forecasting programs, Oregon State University, and the University of Wisconsin-Madison.	5		24811862	Flather, Curtis/0000-0002-0623-3126	Flather, Curtis/G-3577-2012
	J	Beaumont, CN|Goodman, AA|Kendrew, S|Williams, JP|Simpson, R	Beaumont, Christopher N.|Goodman, Alyssa A.|Kendrew, Sarah|Williams, Jonathan P.|Simpson, Robert	THE MILKY WAY PROJECT: LEVERAGING CITIZEN SCIENCE AND MACHINE LEARNING TO DETECT INTERSTELLAR BUBBLES	ASTROPHYSICAL JOURNAL SUPPLEMENT SERIES	English	Article	H II regions; ISM: bubbles; methods: data analysis; stars: formation	MASSIVE-STAR-FORMATION; H-II REGIONS; FAR-INFRARED LOOPS; GALACTIC PLANE; AUTOMATIC DETECTION; MOLECULAR CLOUDS; SHELLS; GALAXY; EVOLUTION; COLLECT	We present Brut, an algorithm to identify bubbles in infrared images of the Galactic midplane. Brut is based on the Random Forest algorithm, and uses bubbles identified by >35,000 citizen scientists from the Milky Way Project to discover the identifying characteristics of bubbles in images from the Spitzer Space Telescope. We demonstrate that Brut's ability to identify bubbles is comparable to ex…	[Beaumont, Christopher N.; Williams, Jonathan P.] Univ Hawaii, Inst Astron, Honolulu, HI 96822 USA.|[Beaumont, Christopher N.; Goodman, Alyssa A.] Harvard Smithsonian Ctr Astrophys, Cambridge, MA 02138 USA.|[Kendrew, Sarah; Simpson, Robert] Univ Oxford, Dept Astrophys, Oxford OX1 3RH, England.	Beaumont, CN (reprint author), Univ Hawaii, Inst Astron, 2680 Woodlawn Dr, Honolulu, HI 96822 USA.	beaumont@ifa.hawaii.edu	Anderson LD, 2011, ASTROPHYS J SUPPL S, V194, DOI 10.1088/0067-0049/194/2/32|Anderson LD, 2012, ASTRON ASTROPHYS, V542, DOI 10.1051/0004-6361/201117283|Anderson LD, 2012, ASTROPHYS J, V754, DOI 10.1088/0004-637X/754/1/62|LANDY SD, 1993, ASTROPHYS J, V412, P64, DOI 10.1086/172900|Breiman L, 2001, MACH LEARN, V45, P5, DOI 10.1023/A:1010933404324|Cardamone C, 2009, MON NOT R ASTRON SOC, V399, P1191,…	59	3	3	4	11	IOP PUBLISHING LTD	BRISTOL	TEMPLE CIRCUS, TEMPLE WAY, BRISTOL BS1 6BE, ENGLAND	0067-0049	1538-4365	ASTROPHYS J SUPPL S	Astrophys. J. Suppl. Ser.	SEP	2014	214			10.1088/0067-0049/214/1/3	18	Astronomy & Astrophysics	Astronomy & Astrophysics	AP0TP	WOS:000341777800003		National Science Foundation [0908159]; Microsoft Research; [NSF-AST1108907]	This research made use of the Scikit-Learn (Pedregosa et al. 2011), Astropy (Astropy Collaboration et al. 2013), and WiseRF software packages. WsieRF is a product of wise.io, Inc., and we thank them for making an academic license freely available. J.P.W. acknowledges support from NSF-AST1108907. This material is based upon work supported by the National Science Foundation under grant No. 0908159.…	1	3
	J	La Sorte, FA|Fink, D|Hochachka, WM|Farnsworth, A|Rodewald, AD|Rosenberg, KV|Sullivan, BL|Winkler, DW|Wood, C|Kelling, S	La Sorte, Frank A.|Fink, Daniel|Hochachka, Wesley M.|Farnsworth, Andrew|Rodewald, Amanda D.|Rosenberg, Kenneth V.|Sullivan, Brian L.|Winkler, David W.|Wood, Chris|Kelling, Steve	The role of atmospheric conditions in the seasonal dynamics of North American migration flyways	JOURNAL OF BIOGEOGRAPHY	English	Article	Citizen science; conservation biogeography; eBird; looped migration; low-level jet stream; migration flyway; North America; seasonal bird migration; wind bearing; wind velocity	LOW-LEVEL JET; SPRING MIGRATION; AVIAN MIGRATION; BIRD MIGRATION; SPECIES RICHNESS; AUTUMN MIGRATION; FLIGHT ALTITUDE; CITIZEN SCIENCE; STOPOVER SITES; WOOD-WARBLERS	Aim Avian migration strategies balance the costs and benefits of annual movements between breeding and wintering grounds. If similar constraints affect a large numbers of species, geographical concentrations of migration routes, or migration flyways, may result. Here we provide the first population-level empirical evaluation of the structure and seasonal dynamics of migration flyways for North Am…	[La Sorte, Frank A.; Fink, Daniel; Hochachka, Wesley M.; Farnsworth, Andrew; Rodewald, Amanda D.; Rosenberg, Kenneth V.; Sullivan, Brian L.; Winkler, David W.; Wood, Chris; Kelling, Steve] Cornell Lab Ornithol, Ithaca, NY 14580 USA.|[Winkler, David W.] Cornell Univ, Museum Vertebrates, Dept Ecol & Evolutionary Biol, Ithaca, NY 14853 USA.	La Sorte, FA (reprint author), Cornell Lab Ornithol, 159 Sapsucker Woods Rd, Ithaca, NY 14580 USA.	fal42@cornell.edu	ABLE KP, 1973, ECOLOGY, V54, P1031, DOI 10.2307/1935569|ABLE KP, 1972, WILSON BULL, V84, P231|Carlisle JD, 2004, CONDOR, V106, P549, DOI 10.1650/7426|La Sorte FA, 2013, ECOLOGY, V94, P1839, DOI 10.1890/12-1768.1|Kemp MU, 2013, IBIS, V155, P734, DOI 10.1111/ibi.12064|Pearce JM, 2009, EVOL APPL, V2, P457, DOI 10.1111/j.1752-4571.2009.00071.x|Swenson NG, 2005, AM NAT, V166, P581, DOI 10.1086/491688|…	68	7	7	15	38	WILEY-BLACKWELL	HOBOKEN	111 RIVER ST, HOBOKEN 07030-5774, NJ USA	0305-0270	1365-2699	J BIOGEOGR	J. Biogeogr.	SEP	2014	41	1685	1696	10.1111/jbi.12328	12	Ecology; Geography, Physical	Environmental Sciences & Ecology; Physical Geography	AP4OC	WOS:000342055900006		Leon Levy Foundation; Wolf Creek Foundation; National Science Foundation [ISS-1125098, IIS-1017793]	We thank K. Webb for assistance with data preparation, N. Bruns, J. DeLong, A. Dhondt, M. Iliff and D. Nicosia for valuable discussions, and F. Liechti and two anonymous referees for constructive comments on the manuscript. We are grateful to the many eBird participants for their contributions to the eBird database. This work was funded by the Leon Levy Foundation, Wolf Creek Foundation, and the …	9
	J	Wootton, JT|Bell, DA	Wootton, J. Timothy|Bell, Douglas A.	Assessing predictions of population viability analysis: Peregrine Falcon populations in California	ECOLOGICAL APPLICATIONS	English	Article	Breeding Bird Survey, BBS; California, USA; Christmas Bird Count, CBC; citizen science; Falco peregrinus; management strategy; Peregrine Falcon; population viability analysis, PVA; post-management monitoring; stage-structured matrix model	MODEL; CONSERVATION; MANAGEMENT; DISEASE	Population viability analysis (PVA) has been an important tool for evaluating species extinction risk and alternative management strategies, but there is little information on how well PVA predicts population trajectories following changes in management actions. We tested previously published predictions from a stage-structured PVA of Peregrine Falcons (Falco peregrinus) in California, USA (Woott…	[Wootton, J. Timothy] Univ Chicago, Dept Ecol & Evolut, Chicago, IL 60637 USA.|[Bell, Douglas A.] Calif Acad Sci, Dept Ornithol & Mammal, San Francisco, CA 94118 USA.	Wootton, JT (reprint author), Univ Chicago, Dept Ecol & Evolut, 1101 East 57th St, Chicago, IL 60637 USA.	twootton@uchicago.edu	Anderson C.M., 1988, P507|Easterling MR, 2000, ECOLOGY, V81, P694, DOI 10.1890/0012-9658(2000)081[0694:SSSAAN]2.0.CO;2|Frick WF, 2010, SCIENCE, V329, P679, DOI 10.1126/science.1188594|Barclay J.H., 1983, Bird Conservation (Madison), V1, P3|Bock C. E., 1981, STUDIES AVIAN BIOL, V6, P17|Brook BW, 2000, NATURE, V404, P385, DOI 10.1038/35006050|BROWN JH, 1989, SCIENCE, V243, P1145, DOI 10.1126/scienc…	43	0	0	11	49	ECOLOGICAL SOC AMER	WASHINGTON	1990 M STREET NW, STE 700, WASHINGTON, DC 20036 USA	1051-0761	1939-5582	ECOL APPL	Ecol. Appl.	SEP	2014	24	1251	1257		7	Ecology; Environmental Sciences	Environmental Sciences & Ecology	AO9YE	WOS:000341715800001		National Science Foundation [DEB 0919420]	We thank the thousands of citizen scientists for their role on collecting the data for the CBC and BBS, K. Dale (National Audubon Society) for assistance in efficiently obtaining some CBC data, and the dedicated staff and volunteers of the Santa Cruz Predatory Bird Research Group, particularly the late B. J. Walton, for their long-term efforts on behalf of the Peregrine Falcon in California. Supp…	6			Wootton, John/0000-0002-7715-0344	Wootton, John/F-3191-2015
	J	Wood, EM|Pidgeon, AM|Radeloff, VC|Helmers, D|Culbert, PD|Keuler, NS|Flather, CH	Wood, Eric M.|Pidgeon, Anna M.|Radeloff, Volker C.|Helmers, David|Culbert, Patrick D.|Keuler, Nicholas S.|Flather, Curtis H.	Housing development erodes avian community structure in U.S. protected areas	ECOLOGICAL APPLICATIONS	English	Article	avian abundance; avian richness; biodiversity; housing density; inholding; land cover; private land; public land	CONTERMINOUS UNITED-STATES; WILDLAND-URBAN INTERFACE; SPECIES RICHNESS; LAND-COVER; CONSERVATION EASEMENTS; HABITAT FRAGMENTATION; FOREST FRAGMENTATION; EXURBAN DEVELOPMENT; HUMAN-POPULATION; MIGRATORY BIRDS	Protected areas are a cornerstone for biodiversity conservation, but they also provide amenities that attract housing development on inholdings and adjacent private lands. We explored how this development affects biodiversity within and near protected areas among six ecological regions throughout the United States. We quantified the effect of housing density within, at the boundary, and outside p…	[Wood, Eric M.; Pidgeon, Anna M.; Radeloff, Volker C.; Helmers, David; Culbert, Patrick D.; Keuler, Nicholas S.] Univ Wisconsin, Dept Forest & Wildlife Ecol, Madison, WI 53706 USA.|[Keuler, Nicholas S.] Univ Wisconsin, Dept Stat, Madison, WI 53706 USA.|[Flather, Curtis H.] US Forest Serv, Rocky Mt Res Stn, USDA, Ft Collins, CO 80526 USA.	Wood, EM (reprint author), Univ Wisconsin, Dept Forest & Wildlife Ecol, 1630 Linden Dr, Madison, WI 53706 USA.	emwood@wisc.edu	Andam KS, 2010, P NATL ACAD SCI USA, V107, P9996, DOI 10.1073/pnas.0914177107|Fahrig L, 2001, BIOL CONSERV, V100, P65, DOI 10.1016/S0006-3207(00)00208-1|Walsh PD, 2003, NATURE, V422, P611, DOI 10.1038/nature01566|Nagendra H, 2008, AMBIO, V37, P330, DOI 10.1579/06-R-184.1|Radeloff VC, 2005, ECOL APPL, V15, P799, DOI 10.1890/04-1413|Cincotta RP, 2000, NATURE, V404, P990, DOI 10.1038/35010105|DeFrie…	89	3	4	23	46	ECOLOGICAL SOC AMER	WASHINGTON	1990 M STREET NW, STE 700, WASHINGTON, DC 20036 USA	1051-0761	1939-5582	ECOL APPL	Ecol. Appl.	SEP	2014	24	1445	1462		18	Ecology; Environmental Sciences	Environmental Sciences & Ecology	AO9YE	WOS:000341715800015		U.S. Forest Service Rocky Mountain Research Station; NASA Biodiversity Program	We gratefully acknowledge support for this research by the U.S. Forest Service Rocky Mountain Research Station and the NASA Biodiversity Program. We thank the volunteers who have collected Breeding Bird Survey and housing census data that made this study possible. We thank S. Martinuzzi and three anonymous reviewers for comments that greatly improved the manuscript.	6			Flather, Curtis/0000-0002-0623-3126	Flather, Curtis/G-3577-2012
	J	Hobson, KA|Van Wilgenburg, SL|Faaborg, J|Toms, JD|Rengifo, C|Sosa, AL|Aubry, Y|Aguilar, RB	Hobson, Keith A.|Van Wilgenburg, Steven L.|Faaborg, John|Toms, Judith D.|Rengifo, Carlos|Sosa, Alejandro Llanes|Aubry, Yves|Aguilar, Rafael Brito	Connecting breeding and wintering grounds of Neotropical migrant songbirds using stable hydrogen isotopes: a call for an isotopic atlas of migratory connectivity	JOURNAL OF FIELD ORNITHOLOGY	English	Article	Bayesian statistical methods; conservation; deuterium; feathers; isoscapes; migratory connectivity	LIGHT-LEVEL GEOLOCATORS; THRUSH CATHARUS-USTULATUS; ET-AL. 2009; NORTH-AMERICA; OPTIMAL CONSERVATION; POPULATION DECLINES; FEATHERS; BIRDS; ORIGINS; DISPERSAL	There is an overdue and urgent need to establish patterns of migratory connectivity linking breeding grounds, stopover sites, and wintering grounds of migratory birds. Such information allows more effective application of conservation efforts by applying focused actions along movement trajectories at the population level. Stable isotope methods, especially those using stable hydrogen isotope abun…	[Hobson, Keith A.; Van Wilgenburg, Steven L.] Environm Canada, Saskatoon, SK S7N 3H5, Canada.|[Faaborg, John; Toms, Judith D.] Univ Missouri, Div Biol Sci, Columbia, MO 65211 USA.|[Rengifo, Carlos] Parque Nacl Sierra Nevada, Estn Ornitol Mucuy, Merida, Venezuela.|[Sosa, Alejandro Llanes] Inst Ecol & Sistemat Ciudad Habana, Havana, Cuba.|[Aubry, Yves] Canadian Wildlife Serv, Quebec City, PQ G1J OC…	Hobson, KA (reprint author), Environm Canada, 11 Innovation Blvd, Saskatoon, SK S7N 3H5, Canada.	keith.hobson@ec.gc.ca	Remsen JV, 2001, AUK, V118, P838, DOI 10.1642/0004-8038(2001)118[0838:TWROTV]2.0.CO;2|Smith TB, 2003, AUK, V120, P218, DOI 10.1642/0004-8038(2003)120[0218:ACFFS]2.0.CO;2|Heckscher CM, 2011, AUK, V128, P531, DOI 10.1525/auk.2011.10280|Stutchbury BJM, 2009, SCIENCE, V323, P896, DOI 10.1126/science.1166664|Ambrosini R, 2009, J THEOR BIOL, V257, P203, DOI 10.1016/j.jtbi.2008.11.019|Gonzalez-Prieto AM…	68	7	7	11	37	WILEY-BLACKWELL	HOBOKEN	111 RIVER ST, HOBOKEN 07030-5774, NJ USA	0273-8570	1557-9263	J FIELD ORNITHOL	J. Field Ornithol.	SEP	2014	85	237	257	10.1111/jofo.12065	21	Ornithology	Zoology	AO7AD	WOS:000341503300002		Environment Canada; U.S. Forest Service, International Institute of Tropical Forestry; Missouri Department of Conservation	B. M. Alvarez prepared feathers for analysis. A. Smith and G. Holroyd assisted with obtaining feather samples from Venezuela and Guatemala, respectively, and L. Wassenaar assisted with isotope analyses. Funding for isotope analyses was provided by an operating grant to KAH from Environment Canada and conducted at the Environment Canada Stable Isotope Facility in Saskatoon. Funding for Puerto Rico…	3
	J	Gagne, JP|Crenshaw, DM|Kraemer, SB|Schmitt, HR|Keel, WC|Rafter, S|Fischer, TC|Bennert, VN|Schawinski, K	Gagne, J. P.|Crenshaw, D. M.|Kraemer, S. B.|Schmitt, H. R.|Keel, W. C.|Rafter, S.|Fischer, T. C.|Bennert, V. N.|Schawinski, K.	SPATIALLY RESOLVED SPECTRA OF THE "TEACUP" ACTIVE GALACTIC NUCLEUS: TRACING THE HISTORY OF A DYING QUASAR	ASTROPHYSICAL JOURNAL	English	Article	cosmic rays; galaxies: active; galaxies: kinematics and dynamics; galaxies: Seyfert; quasars: emission lines; techniques: spectroscopic	NARROW-LINE REGION; PHYSICAL CONDITIONS; GALAXY; EMISSION; CLASSIFICATION; MODELS; SKY	The Sloan Digital Sky Survey (SDSS) Galaxy Zoo project has revealed a number of spectacular galaxies possessing extended emission-line regions (EELRs), the most famous being Hanny's Voorwerp galaxy. We present another EELR object discovered in the SDSS endeavor: the Teacup active galactic nucleus (AGN). Nicknamed for its EELR, which has a "handle"-like structure protruding 15 kpc into the northea…	[Gagne, J. P.; Crenshaw, D. M.; Fischer, T. C.] Georgia State Univ, Dept Phys & Astron, Atlanta, GA 30303 USA.|[Kraemer, S. B.] Catholic Univ Amer, Dept Phys, Washington, DC 20064 USA.|[Schmitt, H. R.] Naval Res Lab, Washington, DC 20375 USA.|[Keel, W. C.] Univ Alabama, Dept Phys & Astron, Tuscaloosa, AL 35487 USA.|[Rafter, S.] Technion Israel Inst Technol, Dept Phys, IL-32000 Haifa, Israel.|[Ben…	Gagne, JP (reprint author), Georgia State Univ, Dept Phys & Astron, 25 Pk Pl South SE,Suite 600, Atlanta, GA 30303 USA.	gagne@chara.gsu.edu	Allen MG, 2008, ASTROPHYS J SUPPL S, V178, P20, DOI 10.1086/589652|Ferland GJ, 2009, MON NOT R ASTRON SOC, V392, P1475, DOI 10.1111/j.1365-2966.2008.14153.x|BECKER RH, 1995, ASTROPHYS J, V450, P559, DOI 10.1086/176166|FERLAND GJ, 1983, ASTROPHYS J, V264, P105, DOI 10.1086/160577|BALDWIN JA, 1981, PUBL ASTRON SOC PAC, V93, P5, DOI 10.1086/130766|CARDELLI JA, 1989, ASTROPHYS J, V345, P245, DOI 10.1…	27	2	2	0	2	IOP PUBLISHING LTD	BRISTOL	TEMPLE CIRCUS, TEMPLE WAY, BRISTOL BS1 6BE, ENGLAND	0004-637X	1538-4357	ASTROPHYS J	Astrophys. J.	2015-09-01	2014	792			10.1088/0004-637X/792/1/72	15	Astronomy & Astrophysics	Astronomy & Astrophysics	AO2RE	WOS:000341172100072		Swiss National Science Foundation [PP00P2_138979/1]	K.S. gratefully acknowledges support from Swiss National Science Foundation Grant PP00P2_138979/1. J.G. acknowledges K.S. for the naming of the Teacup AGN, and thanks D. M.C. and S.B.K. for their mentorship.	1	72
	J	Cooper, CB	Cooper, Caren B.	Is there a weekend bias in clutch-initiation dates from citizen science? Implications for studies of avian breeding phenology	INTERNATIONAL JOURNAL OF BIOMETEOROLOGY	English	Article	Climate change; First-egg dates; Volunteers; NestWatch; Nest record cards; The Birdhouse Network	CLIMATE-CHANGE; DATA QUALITY	Accurate phenology data, such as the timing of migration and reproduction, is important for understanding how climate change influences birds. Given contradictory findings among localized studies regarding mismatches in timing of reproduction and peak food supply, broader-scale information is needed to understand how whole species respond to environmental change. Citizen science-participation of …	Cornell Lab Ornithol, Ithaca, NY 14850 USA.	Cooper, CB (reprint author), Cornell Lab Ornithol, 159 Sapsucker Woods Rd, Ithaca, NY 14850 USA.	caren.cooper@cornell.edu	Bonney R, 2009, BIOSCIENCE, V59, P977, DOI 10.1525/bio.2009.59.11.9|Foster-Smith J, 2003, BIOL CONSERV, V113, P199, DOI 10.1016/S0006-3207(02)00373-7|Bonter DN, 2012, FRONT ECOL ENVIRON, V10, P305, DOI 10.1890/110273|Silvertown J, 2009, TRENDS ECOL EVOL, V24, P467, DOI 10.1016/j.tree.2009.03.017|Wand Y, 1996, COMMUN ACM, V39, P86, DOI 10.1145/240455.240479|Parmesan C, 2003, NATURE, V421, P37, DOI…	23	0	0	7	30	SPRINGER	NEW YORK	233 SPRING ST, NEW YORK, NY 10013 USA	0020-7128	1432-1254	INT J BIOMETEOROL	Int. J. Biometeorol.	SEP	2014	58	1415	1419	10.1007/s00484-013-0742-z	5	Biophysics; Environmental Sciences; Meteorology & Atmospheric Sciences; Physiology	Biophysics; Environmental Sciences & Ecology; Meteorology & Atmospheric Sciences; Physiology	AN8QH	WOS:000340868200002				7		24136094
	J	Khoury, GA|Liwo, A|Khatib, F|Zhou, HY|Chopra, G|Bacardit, J|Bortot, LO|Faccioli, RA|Deng, X|He, Y|Krupa, P|Li, JL|Mozolewska, MA|Sieradzan, AK|Smadbeck, J|Wirecki, T|Cooper, S|Flatten, J|Xu, KF|Baker, D|Cheng, JL|Delbem, ACB|Floudas, CA|Keasar, C|Levitt, M|Popovic, Z|Scheraga, HA|Skolnick, J|Crivelli, SN|Players, F	Khoury, George A.|Liwo, Adam|Khatib, Firas|Zhou, Hongyi|Chopra, Gaurav|Bacardit, Jaume|Bortot, Leandro O.|Faccioli, Rodrigo A.|Deng, Xin|He, Yi|Krupa, Pawel|Li, Jilong|Mozolewska, Magdalena A.|Sieradzan, Adam K.|Smadbeck, James|Wirecki, Tomasz|Cooper, Seth|Flatten, Jeff|Xu, Kefan|Baker, David|Cheng, Jianlin|Delbem, Alexandre C. B.|Floudas, Christodoulos A.|Keasar, Chen|Levitt, Michael|Popovic, Zo…	WeFold: A coopetition for protein structure prediction	PROTEINS-STRUCTURE FUNCTION AND BIOINFORMATICS	English	Article	coopetition; protein structure prediction; CASP; structure refinement; Foldit	INTEGER LINEAR OPTIMIZATION; UNRES FORCE-FIELD; EXCHANGE MOLECULAR-DYNAMICS; STRUCTURE REFINEMENT; CONTACT PREDICTION; HISTOGRAM ANALYSIS; BETA PROTEINS; MONTE-CARLO; ALPHA; SCALE	The protein structure prediction problem continues to elude scientists. Despite the introduction of many method modest gains were made over the last decade for certain classes of prediction targets. To address this challenge, a social. media based worldwide collaborative effort, named WeFold, was undertaken by 13 labs. During the collaboration, the laboratories were simultaneously competing with …	[Khoury, George A.; Smadbeck, James; Floudas, Christodoulos A.] Princeton Univ, Dept Chem & Biol Engn, Princeton, NJ 08544 USA.|[Liwo, Adam; Krupa, Pawel; Mozolewska, Magdalena A.; Sieradzan, Adam K.; Wirecki, Tomasz] Univ Gdansk, Fac Chem, PL-80952 Gdansk, Poland.|[Khatib, Firas; Baker, David] Univ Washington, Dept Biochem, Seattle, WA 98195 USA.|[Zhou, Hongyi; Skolnick, Jeffrey] Georgia Inst Te…	Crivelli, SN (reprint author), Univ Calif Davis, Dept Comp Sci, 1 Shields Ave, Davis, CA 95616 USA.	SNCrivelli@ucdavis.edu	Hess B, 1997, J COMPUT CHEM, V18, P1463, DOI 10.1002/(SICI)1096-987X(199709)18:12<1463::AID-JCC4>3.0.CO;2-H|Liwo A, 2007, J PHYS CHEM B, V111, P260, DOI 10.1021/jp065380a|Radivojac P, 2013, NAT METHODS, V10, P221, DOI [10.1038/nmeth.2340, 10.1038/NMETH.2340]|Zhang Y, 2008, CURR OPIN STRUC BIOL, V18, P342, DOI [10.1016/j.sbi.2008.02.004, 10.1016/i.sbi.2008.02.004]|Zhang Y, 2004, J COMPUT CHEM, V25…	65	4	4	9	29	WILEY-BLACKWELL	HOBOKEN	111 RIVER ST, HOBOKEN 07030-5774, NJ USA	0887-3585	1097-0134	PROTEINS	Proteins	SEP	2014	82	1850	1868	10.1002/prot.24538	19	Biochemistry & Molecular Biology; Biophysics	Biochemistry & Molecular Biology; Biophysics	AN9PT	WOS:000340940300014		Office of Science of the U.S. Department of Energy [DE-AC02-05CH11231]; National Institutes of Health [R01GM052032, R01GM093123, GM063817]; National Science Foundation; National Science Foundation Graduate Research Fellowship [DGE-1148900]; Brazilian funding agency Coordination of the Enhancement of Higher Education (CAPES); Brazilian funding agency Sao Paulo Research Foundation (FAPESP); US Nati…	This research used significant resources of the National Energy Research Scientific Computing Center (NERSC), which is supported by the Office of Science of the U.S. Department of Energy under Contract number DE-AC02-05CH11231. CAF acknowledges support from the National Institutes of Health grant number R01GM052032 and the National Science Foundation. GAK is grateful for support by a National Sci…	9		24677212	Delbem, Alexandre/0000-0003-1810-1742; Bacardit, Jaume/0000-0002-2692-7205	Cheng, Jianlin/N-8209-2013; Krupa, Pawel/G-1676-2015; Cepid, CeMEAI/J-2417-2015; Delbem, Alexandre/A-9287-2008; Bacardit, Jaume/F-9293-2014
	J	Shaby, BA	Shaby, Benjamin A.	The Open-Faced Sandwich Adjustment for MCMC Using Estimating Functions	JOURNAL OF COMPUTATIONAL AND GRAPHICAL STATISTICS	English	Article	Calibration; Covariance tapering; Max-stable process	MAX-STABLE PROCESSES; LARGE SPATIAL DATASETS; ESTIMATING EQUATIONS; BAYESIAN-INFERENCE; DATA SETS; LIKELIHOOD; REPRESENTATION; GEOSTATISTICS; PREDICTION; PARAMETERS	A situation frequently arises where working with the likelihood function is problematic. This can happen for several reasons-perhaps the likelihood is prohibitively computationally expensive, perhaps it lacks some robustness property, or perhaps it is simply not known for the model under consideration. In these cases, it is often possible to specify alternative functions of the parameters and the…	Univ Calif Berkeley, Dept Stat, Berkeley, CA 94720 USA.	Shaby, BA (reprint author), Univ Calif Berkeley, Dept Stat, 429 Evans Hall, Berkeley, CA 94720 USA.	bshaby@gmail.com	Furrer R, 2006, J COMPUT GRAPH STAT, V15, P502, DOI 10.1198/106186006X132178|Lindgren F, 2011, J R STAT SOC B, V73, P423, DOI 10.1111/j.1467-9868.2011.00777.x|Rue H, 2009, J R STAT SOC B, V71, P319, DOI 10.1111/j.1467-9868.2008.00700.x|Kaufman CG, 2008, J AM STAT ASSOC, V103, P1545, DOI 10.1198/016214508000000959|RUBIN DB, 1984, ANN STAT, V12, P1151, DOI 10.1214/aos/1176346785|Cressie N, 2008, J …	57	1	1	3	14	AMER STATISTICAL ASSOC	ALEXANDRIA	732 N WASHINGTON ST, ALEXANDRIA, VA 22314-1943 USA	1061-8600	1537-2715	J COMPUT GRAPH STAT	J. Comput. Graph. Stat.	SEP	2014	23	853	876	10.1080/10618600.2013.842174	24	Statistics & Probability	Mathematics	AK1VJ	WOS:000338205400013				3
	J	Rodriguez, S|Padilla, ND	Rodriguez, Silvio|Padilla, Nelson D.	Erratum: The intrinsic shape of galaxies in SDSS/Galaxy Zoo (vol 434, pg 2153, 2013)	MONTHLY NOTICES OF THE ROYAL ASTRONOMICAL SOCIETY	English	Correction	errata, addenda; surveys; galaxies: fundamental parameters; galaxies: general; galaxies: structure			[Rodriguez, Silvio] UNC CONICET, Inst Astron Teor & Expt, Cordoba, Argentina.|[Padilla, Nelson D.] Pontificia Univ Catolica Chile, Inst Astrofis, Santiago 7820436, Chile.|[Padilla, Nelson D.] Pontificia Univ Catolica Chile, Ctr Astroingn, Santiago 7820436, Chile.	Rodriguez, S (reprint author), UNC CONICET, Inst Astron Teor & Expt, X5000BGR, Cordoba, Argentina.	sirodrig@uc.cl	Rodriguez S, 2013, MON NOT R ASTRON SOC, V434, P2153, DOI 10.1093/mnras/stt1168	1	0	0	1	2	OXFORD UNIV PRESS	OXFORD	GREAT CLARENDON ST, OXFORD OX2 6DP, ENGLAND	0035-8711	1365-2966	MON NOT R ASTRON SOC	Mon. Not. Roy. Astron. Soc.	2015-08-21	2014	442	3096	3096	10.1093/mnras/stu1105	1	Astronomy & Astrophysics	Astronomy & Astrophysics	AM5TZ	WOS:000339924900020				4
	J	Kothiwale, SK|Meiler, J|Lowe, W	Kothiwale, Sandeepkumar K.|Meiler, Jens|Lowe, Will	BCL:Conf A knowledge based ligand flexibility algorithm and application in computational drug discovery like online drug design game Foldit	ABSTRACTS OF PAPERS OF THE AMERICAN CHEMICAL SOCIETY	English	Meeting Abstract				[Kothiwale, Sandeepkumar K.; Meiler, Jens; Lowe, Will] Vanderbilt Univ, Nashville, TN 37235 USA.		sandeepkumar.k.kothiwale@vanderbilt.edu		0	0	0	1	1	AMER CHEMICAL SOC	WASHINGTON	1155 16TH ST, NW, WASHINGTON, DC 20036 USA	0065-7727		ABSTR PAP AM CHEM S	Abstr. Pap. Am. Chem. Soc.	2015-08-10	2014	248				1	Chemistry, Multidisciplinary	Chemistry	CA8JN	WOS:000349165103301
	J	Schmitt, JR|Wang, J|Fischer, DA|Jek, KJ|Moriarty, JC|Boyajian, TS|Schwamb, ME|Lintott, C|Lynn, S|Smith, AM|Parrish, M|Schawinski, K|Simpson, R|LaCourse, D|Omohundro, MR|Winarski, T|Goodman, SJ|Jebson, T|Schwengeler, HM|Paterson, DA|Sejpka, J|Terentev, I|Jacobs, T|Alsaadi, N|Bailey, RC|Ginman, T|Granado, P|Guttormsen, KV|Mallia, F|Papillon, AL|Rossi, F|Socolovsky, M	Schmitt, Joseph R.|Wang, Ji|Fischer, Debra A.|Jek, Kian J.|Moriarty, John C.|Boyajian, Tabetha S.|Schwamb, Megan E.|Lintott, Chris|Lynn, Stuart|Smith, Arfon M.|Parrish, Michael|Schawinski, Kevin|Simpson, Robert|LaCourse, Daryll|Omohundro, Mark R.|Winarski, Troy|Goodman, Samuel Jon|Jebson, Tony|Schwengeler, Hans Martin|Paterson, David A.|Sejpka, Johann|Terentev, Ivan|Jacobs, Tom|Alsaadi, Nawar|Bai…	PLANET HUNTERS. VI. AN INDEPENDENT CHARACTERIZATION OF KOI-351 AND SEVERAL LONG PERIOD PLANET CANDIDATES FROM THE KEPLER ARCHIVAL DATA	ASTRONOMICAL JOURNAL	English	Article	planets and satellites: detection; surveys	POTENTIAL TRANSIT SIGNALS; MAIN-SEQUENCE STARS; 1ST 12 QUARTERS; HABITABLE ZONE; MISSION DATA; EARTH RADII; GALAXY ZOO; SYSTEM; MASS; VALIDATION	We report the discovery of 14 new transiting planet candidates in the Kepler field from the Planet Hunters citizen science program. None of these candidates overlapped with Kepler Objects of Interest (KOIs) at the time of submission. We report the discovery of one more addition to the six planet candidate system around KOI-351, making it the only seven planet candidate system from Kepler. Additio…	[Schmitt, Joseph R.; Wang, Ji; Fischer, Debra A.; Moriarty, John C.; Boyajian, Tabetha S.] Yale Univ, Dept Astron, New Haven, CT 06511 USA.|[Schwamb, Megan E.] Natl Taiwan Univ, Acad Sinica, Inst Astron & Astrophys, Taipei 10617, Taiwan.|[Lintott, Chris; Simpson, Robert] Oxford Astrophys, Oxford OX1 3RH, England.|[Lintott, Chris; Lynn, Stuart; Smith, Arfon M.; Parrish, Michael] Adler Planetarium,…	Schmitt, JR (reprint author), Yale Univ, Dept Astron, New Haven, CT 06511 USA.	joseph.schmitt@yale.edu	Agol E, 2005, MON NOT R ASTRON SOC, V359, P567, DOI 10.1111/j.1365-2966.2005.08922.x|Anglada-Escude G, 2013, ASTRON ASTROPHYS, V556, DOI 10.1051/0004-6361/201321331|Lissauer JJ, 2011, NATURE, V470, P53, DOI 10.1038/nature09760|Lintott CJ, 2008, MON NOT R ASTRON SOC, V389, P1179, DOI 10.1111/j.1365-2966.2008.13689.x|Lintott C, 2011, MON NOT R ASTRON SOC, V410, P166, DOI 10.1111/j.1365-2966.2010.17…	60	6	6	4	15	IOP PUBLISHING LTD	BRISTOL	TEMPLE CIRCUS, TEMPLE WAY, BRISTOL BS1 6BE, ENGLAND	0004-6256	1538-3881	ASTRON J	Astron. J.	AUG	2014	148			10.1088/0004-6256/148/2/28	11	Astronomy & Astrophysics	Astronomy & Astrophysics	AL7OQ	WOS:000339324400004		Yale University; NASA Supplemental Outreach Award [10-OUTRCH.210-0001]; NASA [ADAP12-0172]; Swiss National Science Foundation [PP00P2_138979/1]; NASA JPL's PlanetQuest program; National Science Foundation [DRL-0941610]; The Leverhulme Trust; Alfred P. Sloan foundation; NASA Science Mission directorate; Association of Universities for Research in Astronomy, Inc., under NASA [NAS5-26555]; NASA Offi…	D.F. acknowledges funding support for PlanetHunters.org from Yale University and support from the NASA Supplemental Outreach Award, 10-OUTRCH.210-0001 and the NASA ADAP12-0172. T.S.B. acknowledges support provided through NASA grant ADAP12-0172. K.S. gratefully acknowledges support from Swiss National Science Foundation grant PP00P2_138979/1. Planet Hunters is partially supported by NASA JPL's Pl…	2	28
	J	Davis, DR|Hayes, WB	Davis, Darren R.|Hayes, Wayne B.	SpArcFiRe: SCALABLE AUTOMATED DETECTION OF SPIRAL GALAXY ARM SEGMENTS	ASTROPHYSICAL JOURNAL	English	Article	galaxies: fundamental parameters; galaxies: spiral; galaxies: structure; methods: data analysis; methods: observational; techniques: image processing	DIGITAL-SKY-SURVEY; BLACK-HOLE MASS; PITCH-ANGLE; MORPHOLOGICAL CLASSIFICATIONS; DECOMPOSITION; IMAGES; ZOO; MODELS	Given an approximately centered image of a spiral galaxy, we describe an entirely automated method that finds, centers, and sizes the galaxy (possibly masking nearby stars and other objects if necessary in order to isolate the galaxy itself) and then automatically extracts structural information about the spiral arms. For each arm segment found, we list the pixels in that segment, allowing image …	[Davis, Darren R.; Hayes, Wayne B.] Univ Calif Irvine, Irvine, CA 92697 USA.	Davis, DR (reprint author), Univ Calif Irvine, Irvine, CA 92697 USA.	drdavis@uci.edu; whayes@uci.edu	Lintott CJ, 2008, MON NOT R ASTRON SOC, V389, P1179, DOI 10.1111/j.1365-2966.2008.13689.x|Seigar MS, 1998, MON NOT R ASTRON SOC, V299, P685, DOI 10.1046/j.1365-8711.1998.01779.x|DUDA RO, 1972, COMMUN ACM, V15, P11, DOI 10.1145/361237.361242|Seigar MS, 2006, ASTROPHYS J, V645, P1012, DOI 10.1086/504463|Bertin E, 1996, ASTRON ASTROPHYS SUP, V117, P393, DOI 10.1051/aas:1996164|Peng CY, 2010, ASTRON …	30	3	3	2	2	IOP PUBLISHING LTD	BRISTOL	TEMPLE CIRCUS, TEMPLE WAY, BRISTOL BS1 6BE, ENGLAND	0004-637X	1538-4357	ASTROPHYS J	Astrophys. J.	2015-08-01	2014	790			10.1088/0004-637X/790/2/87	14	Astronomy & Astrophysics	Astronomy & Astrophysics	AL4PV	WOS:000339115800004		ICS Dean's Fellowship at UC Irvine; Oxford Centre for Collaborative Applied Mathematics; MegaMorph project; AGES through NASA [NNX08AW03A]; Alfred P. Sloan Foundation; National Science Foundation; U.S. Department of Energy Office of Science; University of Arizona; Brazilian Participation Group; Brookhaven National Laboratory; Carnegie Mellon University; University of Florida; French Participation…	We thank Steven Bamford for helpful insights, image sample selection, and prepublication access to Galaxy Zoo 2 classifications; Aaron Barth, Barry Madore, Scott Tremaine, Charless Fowlkes, Deva Ramanan, and Eric Mjolsness for helpful discussions; the anonymous referee for helpful suggestions; Sasha Volokh for downloading all the SDSS galaxy images; and the Arkansas Galaxy Evolution Survey (AGES)…	2	87
	J	Auer, SK|King, DI	Auer, Sonya K.|King, David I.	Ecological and life-history traits explain recent boundary shifts in elevation and latitude of western North American songbirds	GLOBAL ECOLOGY AND BIOGEOGRAPHY	English	Article	Ecological specialization; global climate change; life history; range shifts; species traits	CLIMATE-CHANGE IMPACTS; RANGE SHIFTS; BIRDS; RESPONSES; DISTRIBUTIONS; ENVIRONMENTS; COMMUNITIES; PHYLOGENY; DISPERSAL; HOTSPOTS	Aim Species are expected to move uphill or poleward in response to climate change, yet their distributions show idiosyncratic responses; many species are moving in the predicted direction, but others are not shifting at all or are shifting downhill or towards the equator. Fundamental questions remain about the causes of interspecific variation in range responses and whether shifts along elevation…	[Auer, Sonya K.] Univ Massachusetts, Dept Environm Conservat, Amherst, MA 01003 USA.|[King, David I.] Univ Massachusetts, USDA, US Forest Serv, No Res Stn, Amherst, MA 01003 USA.	Auer, SK (reprint author), Univ Glasgow, Inst Biodivers Anim Hlth & Comparat Med, Graham Kerr Bldg, Glasgow G12 8QQ, Lanark, Scotland.	sonya.auer@gmail.com	Angert AL, 2011, ECOL LETT, V14, P677, DOI 10.1111/j.1461-0248.2011.01620.x|Chen IC, 2011, SCIENCE, V333, P1024, DOI 10.1126/science.1206432|Hitch AT, 2007, CONSERV BIOL, V21, P534, DOI 10.1111/j.1523-1739.2006.00609.x|Schloss CA, 2012, P NATL ACAD SCI USA, V109, P8606, DOI 10.1073/pnas.1116791109|Beever EA, 2010, ECOL APPL, V20, P164, DOI 10.1890/08-1011.1|Sol D, 2012, SCIENCE, V337, P580, DOI 1…	59	4	5	9	58	WILEY-BLACKWELL	HOBOKEN	111 RIVER ST, HOBOKEN 07030-5774, NJ USA	1466-822X	1466-8238	GLOBAL ECOL BIOGEOGR	Glob. Ecol. Biogeogr.	AUG	2014	23	867	875	10.1111/geb.12174	9	Ecology; Geography, Physical	Environmental Sciences & Ecology; Physical Geography	AL4NT	WOS:000339110400004		US Forest Service Northern Research Station	We are indebted to the US Geological Survey's Patuxent Wildlife Research Center and Environment Canada's Canadian Wildlife Service for their coordinated leadership of the Breeding Bird Survey and for making data on species status and trends available to the public. We thank all BBS surveyors in the past and present for monitoring bird distribution and abundance across North America. Without their…	8
	J	Lucky, A|Savage, AM|Nichols, LM|Castracani, C|Shell, L|Grasso, DA|Mori, A|Dunn, RR	Lucky, Andrea|Savage, Amy M.|Nichols, Lauren M.|Castracani, Cristina|Shell, Leonora|Grasso, Donato A.|Mori, Alessandra|Dunn, Robert R.	Ecologists, educators, and writers collaborate with the public to assess backyard diversity in The School of Ants Project	ECOSPHERE	English	Article	ants; citizen science; distribution; diversity; public participation in scientific research; urban ecosystems	CITIZEN SCIENCE; QUALITY; BIODIVERSITY; COMPETITION; VOLUNTEERS; MANAGEMENT; BIAS; TOOL	Citizen science can generate data that would not exist otherwise while increasing public scientific literacy. However, the quality and use of citizen science data have been criticized in the recent ecological literature. We need an approach that advances eco-evolutionary understanding, achieves education goals and incorporates public participation into as many aspects of the scientific process as…	[Lucky, Andrea] Univ Florida, Dept Entomol & Nematol, Gainesville, FL 32611 USA.|[Lucky, Andrea; Savage, Amy M.; Nichols, Lauren M.; Shell, Leonora; Dunn, Robert R.] N Carolina State Univ, Dept Biol Sci, Raleigh, NC 27607 USA.|[Castracani, Cristina; Grasso, Donato A.; Mori, Alessandra] Univ Parma, Dipartimento Biosci, I-43124 Parma, Italy.	Lucky, A (reprint author), Univ Florida, Dept Entomol & Nematol, 970 Nat Area Dr, Gainesville, FL 32611 USA.	amy_savage@ncsu.edu	Andersen AN, 2004, FRONT ECOL ENVIRON, V2, P291|Bonney R, 2009, BIOSCIENCE, V59, P977, DOI 10.1525/bio.2009.59.11.9|Foster-Smith J, 2003, BIOL CONSERV, V113, P199, DOI 10.1016/S0006-3207(02)00373-7|Bradshaw B, 2003, CAN GEOGR-GEOGR CAN, V47, P137, DOI 10.1111/1541-0064.t01-1-00001|Conrad CC, 2011, ENVIRON MONIT ASSESS, V176, P273, DOI 10.1007/s10661-010-1582-5|Bonter DN, 2012, FRONT ECOL ENVIRON,…	44	1	1	11	29	ECOLOGICAL SOC AMER	WASHINGTON	1990 M STREET NW, STE 700, WASHINGTON, DC 20036 USA	2150-8925		ECOSPHERE	Ecosphere	JUL	2014	5			10.1890/ES13-00364.1	23	Ecology	Environmental Sciences & Ecology	AT7DJ	WOS:000345096600001		NSF [551819-0654]; Fondazione CARIPARMA grant	We thank participants for making SOA possible. Thanks to N. McCoy, A. Lit and W. Bowling for making the website successful. Thanks to our assistants for their diligent work, including K. Driscoll, C. Salinas, B. Price, J. Markham, J. Fitzgerald, S. Anderson and M. Pridgen. Thanks to B. Boudinot, R. Johnson, A. Wild, and J. Trager for identifications. Additional thanks to N. Haddad, C. Brennan and…	7	78		Castracani, Cristina/0000-0001-8802-9614; Mori, Alessandra/0000-0001-6544-3038	Castracani, Cristina/F-3405-2012; Mori, Alessandra/F-4382-2012
	J	Seiber, T	Seiber, Tim	Playable Virus: HIV Molecular Aesthetics in Science and Popular Culture	ANIMATION-AN INTERDISCIPLINARY JOURNAL	English	Article	ACT UP; aesthetics; animation; ethics; Foldit; HIV; life itself; molecular biology; simulation; visualization	PFIZER MONKEY VIRUS; MICROCINEMATOGRAPHY; ENVELOPE; VACCINE	Viral aesthetics have become increasingly present in representations of health and illness. Since electron microscopy was first used to graphically isolate HIV, the 'viral look' has influenced academic and popular discussions about life and death. Commonly, the virus is associated with rapid and unseen transmission, hiding and genetic recoding that make identification and elimination difficult, a…	[Seiber, Tim] Univ Redlands, Redlands, CA 92373 USA.	Seiber, T (reprint author), Univ Redlands, Johnston Ctr Integrat Studies, 1200 E Colton Ave, Redlands, CA 92373 USA.	tim_seiber@redlands.edu	Abir-Am P, 2006, HIST SCI, V26, P1|Blaise S, 2001, J GEN VIROL, V82, P1597|Boyle A, 2011, NBC NEWS 0911|Cohen E, 2011, SOCIAL TEXT, V29, P15|Coren M, 2011, SCI AM|Epstein Steven, 1996, IMPURE SCI AIDS ACTI|Flegler S, 1993, SCANNING TRANSMISSI|Franco J, 2012, J CHEM EDUC, V89, P1543, DOI 10.1021/ed200803e|Gilman S, 1987, OCTOBER, V43, P87, DOI 10.2307/3397566|Haraway D, 1996, CULTURAL STUDIES, P29…	38	0	0	4	7	SAGE PUBLICATIONS INC	THOUSAND OAKS	2455 TELLER RD, THOUSAND OAKS, CA 91320 USA	1746-8477	1746-8485	ANIMATION	Animation	JUL	2014	9	261	276	10.1177/1746847714526661	16	Film, Radio, Television	Film, Radio & Television	AM8LL	WOS:000340126800011				2
	J	Booms, TL|Holroyd, GL|Gahbauer, MA|Trefry, HE|Wiggins, DA|Holt, DW|Johnson, JA|Lewis, SB|Larson, MD|Keyes, KL|Swengel, S	Booms, Travis L.|Holroyd, Geoffrey L.|Gahbauer, Marcel A.|Trefry, Helen E.|Wiggins, David A.|Holt, Denver W.|Johnson, James A.|Lewis, Stephen B.|Larson, Matt D.|Keyes, Kristen L.|Swengel, Scott	Assessing the status and conservation priorities of the short-eared owl in North America	JOURNAL OF WILDLIFE MANAGEMENT	English	Article	Asio flammeus; conservation; decline; grassland; North America; research priorities; short-eared owl; status	GRASSLAND; PREDATORS; ABUNDANCE; HARRIERS; SUCCESS; CYCLES; VOLE	The North American Breeding Bird Survey, Christmas Bird Count, and regional and national conservation assessments provide convincing evidence that the short-eared owl (Asio flammeus) is experiencing a range-wide, long-term decline in abundance in North America. However, the species has received little conservation or research attention. The short-eared owl is vulnerable to decline because it reli…	[Booms, Travis L.] Alaska Dept Fish & Game, Fairbanks, AK 99701 USA.|[Holroyd, Geoffrey L.] Environm Canada, Beaverhill Bird Observ, Tofield, AB T0B 4J0, Canada.|[Gahbauer, Marcel A.; Keyes, Kristen L.] Migrat Res Fdn, Ste Anne De Bellevue, PQ H9X0A6, Canada.|[Trefry, Helen E.] Canadian Wildlife Serv, Beaverhill Bird Observ, Tofield, AB T0B 4J0, Canada.|[Wiggins, David A.] Hallkved, S-75597 Uppsa…	Booms, TL (reprint author), Alaska Dept Fish & Game, 1300 Coll Rd, Fairbanks, AK 99701 USA.	travis.booms@alaska.gov	SAMSON F, 1994, BIOSCIENCE, V44, P418, DOI 10.2307/1312365|Sergio F, 2006, J APPL ECOL, V43, P1049, DOI 10.1111/j.1365-2664.2006.01218.x|Audubon, 2012, CHRISTM BIRD COUNT R|Bart J, 1995, AUK, V112, P758|Calladine J., 2005, 394 BTO U STIRL|Calladine J, 2010, BIRD STUDY, V57, P89|CAMPBELL R.W., 1990, BIRDS BRIT COLUMBIA|Clark R.J., 1975, Wildlife Monogr, VNo. 47, P1|Committee on the Status of Endan…	49	0	0	14	47	WILEY-BLACKWELL	HOBOKEN	111 RIVER ST, HOBOKEN 07030-5774, NJ USA	0022-541X	1937-2817	J WILDLIFE MANAGE	J. Wildl. Manage.	JUL	2014	78	772	778	10.1002/jwmg.719	7	Ecology; Zoology	Environmental Sciences & Ecology; Zoology	AJ8PB	WOS:000337967100003		Alaska Department of Fish and Game Wildlife Diversity Program through the federal State Wildlife Grant program	We thank the participants of the workshops and symposia held in 2006 in Manitoba, 2007 in Pennsylvania and Netherlands, 2008 in Montana, 2009 in Alberta, and 2011 in Minnesota who provided background for this paper. We also thank C. Barger, M. Bechard, J. Calladine, J. Hagelin, E. Merrill, D. Rabe, M. Rabe, A. Swengel, and K. Titus for reviewing earlier versions of this draft and L. McCarthy for …	5
	J	Manzer, LH|De Robertis, MM	Manzer, L. H.|De Robertis, M. M.	THE EFFECTS OF THE LOCAL ENVIRONMENT ON ACTIVE GALACTIC NUCLEI	ASTROPHYSICAL JOURNAL	English	Article	galaxies: active; galaxies: interactions; galaxies: statistics	DIGITAL-SKY-SURVEY; SUPERMASSIVE BLACK-HOLES; EARLY-TYPE GALAXIES; LARGE-SCALE STRUCTURE; STAR-FORMATION RATES; AGN HOST GALAXIES; SEYFERT-GALAXIES; DATA RELEASE; INTERACTING GALAXIES; LUMINOSITY FUNCTION	There continues to be significant controversy regarding the mechanism(s) responsible for the initiation and maintenance of activity in galactic nuclei. In this paper we will investigate possible environmental triggers of nuclear activity through a statistical analysis of a large sample of galaxy groups. The focus of this paper is to identify active galactic nuclei (AGNs) and other emission-line g…	[Manzer, L. H.; De Robertis, M. M.] York Univ, Dept Phys & Astron, Toronto, ON M3J 1P3, Canada.	Manzer, LH (reprint author), York Univ, Dept Phys & Astron, Toronto, ON M3J 1P3, Canada.	liannemanzer@gmail.com; mmdr@yorku.ca	Adelman-McCarthy JK, 2006, ASTROPHYS J SUPPL S, V162, P38, DOI 10.1086/497917|Allam S., 1998, THESIS U POTSDAM|Allam S., 1996, YCAT, V411, P70039|Allam SS, 1999, ASTROPHYS J, V522, pL89, DOI 10.1086/312224|Alonso MS, 2007, MON NOT R ASTRON SOC, V375, P1017, DOI 10.1111/j.1365-2966.2007.11367.x|Alonso MS, 2004, MON NOT R ASTRON SOC, V352, P1081, DOI 10.1111/j.1365-2966.2004.08002.x|Kauffmann G, 20…	156	0	0	3	3	IOP PUBLISHING LTD	BRISTOL	TEMPLE CIRCUS, TEMPLE WAY, BRISTOL BS1 6BE, ENGLAND	0004-637X	1538-4357	ASTROPHYS J	Astrophys. J.	2015-06-20	2014	788			10.1088/0004-637X/788/2/140	16	Astronomy & Astrophysics	Astronomy & Astrophysics	AJ2DT	WOS:000337466200043		Alfred P. Sloan Foundation; National Aeronautics and Space Administration; National Science Foundation; U. S. Department of Energy; Japanese Monbukagakusho; Max Planck Society	Funding for the Sloan Digital Sky Survey (SDSS) has been provided by the Alfred P. Sloan Foundation, the Participating Institutions, the National Aeronautics and Space Administration, the National Science Foundation, the U. S. Department of Energy, the Japanese Monbukagakusho, and the Max Planck Society. The SDSS Web site is http://www.sdss.org/.	2	140
	J	Paul, K|Quinn, MS|Huijser, MP|Graham, J|Broberg, L	Paul, Kylie|Quinn, Michael S.|Huijser, Marcel P.|Graham, Jonathan|Broberg, Len	An evaluation of a citizen science data collection program for recording wildlife observations along a highway	JOURNAL OF ENVIRONMENTAL MANAGEMENT	English	Article	Citizen science; Wildlife; Highway; Mitigation; Hotspot	WHITE-TAILED DEER; SPATIAL-PATTERNS; VEHICLE COLLISIONS; GRIZZLY BEARS; MITIGATION; PERFORMANCE; VOLUNTEERS; MORTALITY; QUALITY; CONSERVATION	Citizen science programs that record wildlife observations on and along roads can help reduce the underreporting of wildlife-vehicle collisions and identify and prioritize road sections where mitigation measures may be required. It is important to evaluate potential biases in opportunistic citizen science data. We investigated whether the opportunistic observations of live animals by volunteers a…	[Paul, Kylie; Broberg, Len] Univ Montana, Environm Studies Program, Missoula, MT 59812 USA.|[Quinn, Michael S.] Mt Royal Univ, Inst Environm Sustainabil, Calgary, AB T3E 6K6, Canada.|[Huijser, Marcel P.] Montana State Univ, Western Transportat Inst, Bozeman, MT 59717 USA.|[Graham, Jonathan] Univ Montana, Dept Math Sci, Missoula, MT 59812 USA.	Paul, K (reprint author), 500 Linden St, Missoula, MT 59802 USA.	skylie101@yahoo.com; mquinn@mtroyal.ca; mhuijser@coe.montana.edu; jgraham@mso.umt.edu; Broberg@mso.umt.edu	Alberta Infrastructure and Transportation, 2006, ALB PROV HIGHW PROJ|Alberta Infrastructure and Transportation, 2006, AUT TRAFF REC MONTHL|Bonney R, 2009, BIOSCIENCE, V59, P977, DOI 10.1525/bio.2009.59.11.9|Foster-Smith J, 2003, BIOL CONSERV, V113, P199, DOI 10.1016/S0006-3207(02)00373-7|Mountrakis G, 2009, INT J GEOGR INF SCI, V23, P1389, DOI 10.1080/13658810802406132|RIPLEY BD, 1977, J ROY STAT…	57	0	0	7	44	ACADEMIC PRESS LTD- ELSEVIER SCIENCE LTD	LONDON	24-28 OVAL RD, LONDON NW1 7DX, ENGLAND	0301-4797	1095-8630	J ENVIRON MANAGE	J. Environ. Manage.	2015-06-15	2014	139	180	187	10.1016/j.jenvman.2014.02.018	8	Environmental Sciences	Environmental Sciences & Ecology	AJ7HG	WOS:000337867200019		H.P. Kendall Foundation; Wiancko Charitable Foundation; Yellowstone to Yukon Conservation Initiative's Partner Grants; Clancy Gordon Environmental Scholarship	The authors are grateful to the volunteers of the "Road Watch in the Pass" (RW) data collection program. We also thank Tracy Lee and others at the Miistakis Institute of the Rockies for developing the RW program and for providing the opportunistic data. In addition we appreciate Rob Schaufle's data collection efforts and we thank Alberta Sustainable Resource Development for the use of their vehic…			24705097		Huijser, Marcel/B-5048-2015
	J	Losey, JE|Allee, LL|Stephens, E|Smyth, RR|Priolo, P|Tyrrell, L|Chaskey, S|Stellwag, L	Losey, John E.|Allee, Leslie L.|Stephens, Erin|Smyth, Rebecca R.|Priolo, Peter|Tyrrell, Leah|Chaskey, Scott|Stellwag, Leonard	Lady Beetles in New York: Insidious Invasions, Erstwhile Extirpations, and Recent Rediscoveries	NORTHEASTERN NATURALIST	English	Article		COLEOMEGILLA-MACULATA COLEOPTERA; NORTH-AMERICA; COCCINELLA-NOVEMNOTATA; NATIVE COCCINELLIDS; HARMONIA-AXYRIDIS	Over the past 40 years, the complex of coccinellid (lady beetle or ladybug) species in New York has undergone substantial changes. Primarily, these changes have involved the decline of native species and the increase and spread of adventive species. Species declines have proceeded to the extent that several native species were feared to be extirpated from New York. Here we report that two of thes…	[Losey, John E.; Allee, Leslie L.; Stephens, Erin; Smyth, Rebecca R.; Tyrrell, Leah; Stellwag, Leonard] Cornell Univ, Dept Entomol, Lost Ladybug Project, Ithaca, NY 14853 USA.|[Chaskey, Scott] Quail Hill Farm, Amagansett, NY 11930 USA.	Allee, LL (reprint author), Cornell Univ, Dept Entomol, Lost Ladybug Project, Ithaca, NY 14853 USA.	LLA1@cornell.edu	Angalet G., 1973, COOPERATIVE EC INSEC, P883|Cottrell TE, 1998, J KANSAS ENTOMOL SOC, V71, P159|Jost L, 2006, OIKOS, V113, P363, DOI 10.1111/j.2006.0030-1299.14714.x|BALTZ DM, 1993, ECOL APPL, V3, P246, DOI 10.2307/1941827|Bazzocchi GG, 2004, BIOCONTROL, V49, P245, DOI 10.1023/B:BICO.0000025382.07841.b4|Blount J., 2012, FUNCTIONAL ECOLOGY, V26, P1|Day W.H, 1965, THESIS|de Jong PW, 1998, P ROY SOC…	34	1	1	2	4	HUMBOLDT FIELD RESEARCH INST	STEUBEN	PO BOX 9, STEUBEN, ME 04680-0009 USA	1092-6194	1938-5307	NORTHEAST NAT	Northeast. Nat	JUN	2014	21	271	284	10.1656/045.021.0209	14	Biodiversity Conservation; Ecology	Biodiversity & Conservation; Environmental Sciences & Ecology	AQ0QP	WOS:000342488100009		Informal Science Education Program of the National Science Foundation; Peconic Land Trust	The authors wish to thank the Quail Hill Frame 2011-2013 field crews for their enthusiastic assistance. The authors also thank the Peconic Land Trust for their gracious hospitality and support. The LLP is funded by a grant from the Informal Science Education Program of the National Science Foundation.	2
	J	Wellicome, TI|Kardynal, KJ|Franken, RJ|Gillies, CS	Wellicome, Troy I.|Kardynal, Kevin J.|Franken, Renee J.|Gillies, Cameron S.	Off-road sampling reveals a different grassland bird community than roadside sampling: implications for survey design and estimates to guide conservation	AVIAN CONSERVATION AND ECOLOGY	English	Article	agriculture; grassland birds; human-modified habitats; North American Breeding Bird Survey; roadside bias; species distribution models	SOUTHERN SASKATCHEWAN; LANDSCAPE CHANGE; SURVEY ROUTES; ABUNDANCE; MODELS; POPULATIONS; ACCURACY; DECLINES; PLAINS; BIASES	Grassland bird species continue to decline steeply across North America. Road-based surveys such as the North American Breeding Bird Survey (BBS) are often used to estimate trends and population sizes and to build species distribution models for grassland birds, although roadside survey counts may introduce bias in estimates because of differences in habitats along roadsides and in off-road surve…	[Wellicome, Troy I.; Kardynal, Kevin J.; Franken, Renee J.] Environm Canada, Canadian Wildlife Serv, Edmonton, AB T6B 1K5, Canada.|[Franken, Renee J.; Gillies, Cameron S.] Tierra Environm Consulting, Windermere, BC, Canada.	Wellicome, TI (reprint author), Environm Canada, Canadian Wildlife Serv, 9250 49th St NW, Edmonton, AB T6B 1K5, Canada.	troy.wellicome@ec.gc.ca	Alberta Environment and Sustainable Resource Development, 2010, WILD SPEC STAT SEARC|SAMSON F, 1994, BIOSCIENCE, V44, P418, DOI 10.2307/1312365|Dufrene M, 1997, ECOL MONOGR, V67, P345, DOI 10.2307/2963459|Brotons L, 2004, ECOGRAPHY, V27, P437, DOI 10.1111/j.0906-7590.2004.03764.x|Boren JC, 1999, J RANGE MANAGE, V52, P420, DOI 10.2307/4003767|Guisan A, 2005, ECOL LETT, V8, P993, DOI 10.1111/j.1461…	69	0	0	6	33	RESILIENCE ALLIANCE	WOLFVILLE	ACADIA UNIV, BIOLOGY DEPT, WOLFVILLE, NS B0P 1X0, CANADA	1712-6568		AVIAN CONSERV ECOL	Avian Conserv. Ecol.	JUN	2014	9			10.5751/ACE-00624-090104	13	Biodiversity Conservation; Ecology; Ornithology	Biodiversity & Conservation; Environmental Sciences & Ecology; Zoology	AL1ZY	WOS:000338926700004		Alberta Conservation Association; Biodiversity Fund of Alberta; Alberta North American Waterfowl Management Partnership; Canadian Wildlife Service, Environment Canada	We are grateful to private landowners who allowed us access to their land. We thank K. Hannah, E. Spiewak, T. Hope, and B. Wheatcroft for helping to conduct habitat and bird surveys, S. Stevens for help with a literature research and editing, M. W. Alldredge, R. Fisher, B. Dale, and two anonymous reviewers for helpful suggestions on earlier versions of this manuscript, and C. Scobie for providing…	1
	J	Strohbach, MW|Hrycyna, A|Warren, PS	Strohbach, Michael W.|Hrycyna, Andrew|Warren, Paige S.	150 YEARS OF CHANGES IN BIRD LIFE IN CAMBRIDGE, MASSACHUSETTS FROM 1860 TO 2012	WILSON JOURNAL OF ORNITHOLOGY	English	Article	community composition change; eBird; habitat change; land-cover/land-use change; long-term data; suburban/urban birds; urbanization	URBAN ECOSYSTEMS; LAND-USE; URBANIZATION; COMMUNITIES; COMPETITION; DIVERSITY; INVASION	The process of urbanization and its effects on birds has rarely been documented over long time periods. One exception is a bird count started in the 1860s, when the American ornithologist William Brewster first recorded all the bird species on his property in Cambridge, Massachusetts. Since then, invasive species such as the House Sparrow (Passer domesticus) have been introduced, and the site tra…	[Strohbach, Michael W.; Warren, Paige S.] Univ Massachusetts, Dept Environm Conservat, Amherst, MA 01003 USA.|[Hrycyna, Andrew] Harvard Univ, Extens Sch, Sustainabil & Environm Management Grad Program, Cambridge, MA 02138 USA.	Strohbach, MW (reprint author), Humboldt Univ, Dept Geog, Landscape Ecol Lab, Unter Linden 6, D-10099 Berlin, Germany.	michael.strohbach@geo.hu-berlin.de	Ortega-Alvarez R, 2009, LANDSCAPE URBAN PLAN, V90, P189, DOI 10.1016/j.landurbplan.2008.11.003|[Anonymous], 1962, INS MAPS CAMBR MASS|[Anonymous], 1930, ATL CIT CAMBR MASS|White JG, 2005, LANDSCAPE URBAN PLAN, V71, P123, DOI 10.1016/j.landurbplan.2004.02.006|Gurevitch J, 2004, TRENDS ECOL EVOL, V19, P470, DOI 10.1016/j.tree.2004.07.005|[Anonymous], 1900, INS MAPS CAMBR MASS|Badyaev AV, 2012, BIRD…	60	1	1	6	22	WILSON ORNITHOLOGICAL SOC	WACO	5400 BOSQUE BLVD, STE 680, WACO, TX 76710 USA	1559-4491	1938-5447	WILSON J ORNITHOL	Wilson J. Ornithol.	JUN	2014	126	192	206		15	Ornithology	Zoology	AL2SM	WOS:000338975600002		Massachusetts Agricultural Experiment Station; Department of Environmental Conservation [MAS009584]; National Science Foundation [BCS-0948984]	We thank the residents of sites A and B, who have been extremely welcoming and enthusiastic about our study. We also thank V. Wolff and the Urban Ecology Institute for help with contacting residents, J. Amero from the city of Cambridge IT Department for providing GIS data, and the anonymous reviewers for their comments. Support for this study came from Massachusetts Agricultural Experiment Statio…	2
	J	Fink, D|Damoulas, T|Bruns, NE|La Sorte, FA|Hochachka, WM|Gomes, CP|Kelling, S	Fink, Daniel|Damoulas, Theodoros|Bruns, Nicholas E.|La Sorte, Frank A.|Hochachka, Wesley M.|Gomes, Carla P.|Kelling, Steve	Crowdsourcing Meets Ecology: Hemispherewide Spatiotemporal Species Distribution Models	AI MAGAZINE	English	Article		COVARIANCE FUNCTIONS; SPATIAL-PREDICTION; CITIZEN SCIENCE; SCALE; MIGRATION; DISTANCE; SPLINES	Ecological systems are inherently complex. The processes that affect the distributions of animals and plants operate at multiple spatial and temporal scales, presenting a unique challenge for the development and coordination of effective conservation strategies, particularly for wide-ranging species. In order to study ecological systems across scales,. data must be collected at fine resolutions a…	[Fink, Daniel] Cornell Lab Ornithol, Informat Sci Program, Ithaca, NY 14850 USA.|[Damoulas, Theodoros] NYU, New York, NY 10003 USA.|[Damoulas, Theodoros] NYU, Ctr Urban Sci & Progress, New York, NY 10003 USA.|[Damoulas, Theodoros] NYU, Polytech Sch Engn Area Urban Informat, New York, NY 10003 USA.|[Bruns, Nicholas E.] Cornell Lab Ornithol, Informat Sci Team, Ithaca, NY USA.|[La Sorte, Frank A.; H…	Fink, D (reprint author), Cornell Lab Ornithol, Informat Sci Program, Ithaca, NY 14850 USA.		La Sorte FA, 2013, ECOLOGY, V94, P1839, DOI 10.1890/12-1768.1|Kuncheva LI, 2003, MACH LEARN, V51, P181, DOI 10.1023/A:1022859003006|Stein ML, 2005, J AM STAT ASSOC, V100, P310, DOI 10.1198/016214504000000854|Stutchbury BJM, 2009, SCIENCE, V323, P896, DOI 10.1126/science.1166664|LEVIN SA, 1992, ECOLOGY, V73, P1943, DOI 10.2307/1941447|Cressie N, 2008, J ROY STAT SOC B, V70, P209|Breiman L, 1996, M…	43	1	1	6	26	AMER ASSOC ARTIFICIAL INTELL	MENLO PK	445 BURGESS DRIVE, MENLO PK, CA 94025-3496 USA	0738-4602		AI MAG	AI Mag.	SUM	2014	35	19	30		12	Computer Science, Artificial Intelligence	Computer Science	AJ5ZH	WOS:000337768900003		Leon Levy Foundation; Wolf Creek Foundation; National Science Foundation [OCT-0830944, CCF-0832782, ITR-0427914, DBI-1049363, DBI-0542868, DUE-0734857, IIS-0748626, IIS-0844546, IIS-0612031, IIS-1050422, IIS-0905385, IIS-0746500, IIS-1209589, AGS-0835821, CNS-0751152, CNS-0855167, IIS-1017793, CDI-1125098, CNS-1059284, OCT-1053575, DEB-110008]	We thank the thousands of eBird participants, K. Rosenberg, S. Sukhnanand, and the Lab of Ornithology IS eBird team - K. Webb, M. Iliff, J. Gerbracht, T. Lenz, W. Morris, B. Sullivan, and C. Wood. This work was supported by the Leon Levy Foundation, the Wolf Creek Foundation, and the National Science Foundation (OCI-0830944, CCF-0832782, ITR-0427914, DBI-1049363, DBI-0542868, DUE-0734857, IIS-074…	2
	J	Farmer, RG|Leonard, ML|Flemming, JEM|Anderson, SC	Farmer, Robert G.|Leonard, Marty L.|Flemming, Joanna E. Mills|Anderson, Sean C.	Observer aging and long-term avian survey data quality	ECOLOGY AND EVOLUTION	English	Article	Avian ecology; citizen science; observer error; point counts; population trend estimation	BREEDING BIRD SURVEY; GENERALIZED ADDITIVE-MODELS; ANURAN CALL SURVEYS; POPULATION-CHANGE; POINT COUNTS; SEASONAL COMPONENTS; OBSERVATION ERROR; OCCUPANCY MODELS; AURAL DETECTIONS; LAND BIRDS	Long-term wildlife monitoring involves collecting time series data, often using the same observers over multiple years. Aging-related changes to these observers may be an important, under-recognized source of error that can bias management decisions. In this study, we used data from two large, independent bird surveys, the Atlas of the Breeding Birds of Ontario ("OBBA") and the North American Bre…	[Farmer, Robert G.; Leonard, Marty L.; Anderson, Sean C.] Dalhousie Univ, Dept Biol, Halifax, NS B3H 4R2, Canada.|[Flemming, Joanna E. Mills] Dalhousie Univ, Dept Math & Stat, Halifax, NS B3H 4R2, Canada.|[Anderson, Sean C.] Simon Fraser Univ, Dept Biol Sci, Earth Ocean Res Grp, Burnaby, BC V5A 1S6, Canada.	Farmer, RG (reprint author), Dalhousie Univ, Dept Biol, 1355 Oxford St, Halifax, NS B3H 4R2, Canada.	farmerb@dal.ca	Agrawal Y, 2008, ARCH INTERN MED, V168, P1522, DOI 10.1001/archinte.168.14.1522|Alldredge MW, 2006, AUK, V123, P1172, DOI 10.1642/0004-8038(2006)123[1172:EDPFMP]2.0.CO;2|Alldredge MW, 2007, ECOL APPL, V17, P948, DOI 10.1890/06-0685|Miller DA, 2011, ECOLOGY, V92, P1422, DOI 10.1890/10-1396.1|Lunn D, 2009, STAT MED, V28, P3049, DOI 10.1002/sim.3680|Dickinson JL, 2010, ANNU REV ECOL EVOL S, V41, P14…	66	0	0	10	29	WILEY-BLACKWELL	HOBOKEN	111 RIVER ST, HOBOKEN 07030-5774, NJ USA	2045-7758		ECOL EVOL	Ecol. Evol.	JUN	2014	4	2563	2576	10.1002/ece3.1101	14	Ecology	Environmental Sciences & Ecology	AJ5PX	WOS:000337738800018		NSERC; Dalhousie University; Simon Fraser University	Research funding was provided by NSERC, Dalhousie University, and Simon Fraser University.	12		25360286
	J	Hines, JE|Nichols, JD|Collazo, JA	Hines, James E.|Nichols, James D.|Collazo, Jaime A.	Multiseason occupancy models for correlated replicate surveys	METHODS IN ECOLOGY AND EVOLUTION	English	Article	Breeding Bird Surveys; brown-headed nuthatch; correlated replicate surveys; imperfect detection; multiseason models; occupancy	ESTIMATING SITE OCCUPANCY; BREEDING BIRD SURVEY; LOCAL EXTINCTION; TURNOVER RATES; ABUNDANCE; DYNAMICS; HABITAT; RANGES	Occupancy surveys collecting data from adjacent (sometimes correlated) spatial replicates have become relatively popular for logistical reasons. Hines etal. () presented one approach to modelling such data for single-season occupancy surveys. Here, we present a multiseason analogue of this model (with corresponding software) for inferences about occupancy dynamics. We include a new parameter to d…	[Hines, James E.; Nichols, James D.] US Geol Survey, Patuxent Wildlife Res Ctr, Laurel, MD 20708 USA.|[Collazo, Jaime A.] N Carolina State Univ, US Geol Survey, North Carolina Cooperat Fish & Wildlife Res Unit, Raleigh, NC 27695 USA.|[Collazo, Jaime A.] N Carolina State Univ, Dept Appl Ecol, Raleigh, NC 27695 USA.	Hines, JE (reprint author), US Geol Survey, Patuxent Wildlife Res Ctr, Laurel, MD 20708 USA.	jhines@usgs.gov	MacKenzie DI, 2003, ECOLOGY, V84, P2200, DOI 10.1890/02-3090|MacKenzie DI, 2002, ECOLOGY, V83, P2248, DOI 10.2307/3072056|Brown JH, 1996, ANNU REV ECOL SYST, V27, P597, DOI 10.1146/annurev.ecolsys.27.1.597|Karanth KU, 2011, J APPL ECOL, V48, P1048, DOI 10.1111/j.1365-2664.2011.02002.x|Bailey LL, 2014, METHODS ECOL EVOL, V5, P1269, DOI 10.1111/2041-210X.12100|Bled F, 2011, ECOL APPL, V21, P290, DO…	33	0	0	6	29	WILEY-BLACKWELL	HOBOKEN	111 RIVER ST, HOBOKEN 07030-5774, NJ USA	2041-210X	2041-2096	METHODS ECOL EVOL	Methods Ecol. Evol.	JUN	2014	5	583	591	10.1111/2041-210X.12186	9	Ecology	Environmental Sciences & Ecology	AJ5UK	WOS:000337754500010		USGS Patuxent Wildlife Research Center; North Carolina Cooperative Fish and Wildlife Research Unit and the Department of Applied Ecology at North Carolina State University	We thank the USGS Patuxent Wildlife Research Center, North Carolina Cooperative Fish and Wildlife Research Unit and the Department of Applied Ecology at North Carolina State University for their support (Research Work Order 194). We also thank Steve Williams for his assistance in obtaining Breeding Bird Survey data and map of the South Atlantic Coastal Plain. We thank Krishna Pacifici, John Sauer…	6
	J	Villarroel, B|Korn, AJ	Villarroel, Beatriz|Korn, Andreas J.	The different neighbours around Type-1 and Type-2 active galactic nuclei	NATURE PHYSICS	English	Article		DIGITAL-SKY-SURVEY; SEYFERT-2 GALAXIES; DATA RELEASE; QUASARS; MODELS; ZOO	One of the most intriguing open issues in galaxy evolution is the structure and evolution of active galactic nuclei (AGN) that emit intense light believed to come from an accretion disk near a super massive black hole(1,2). To understand the zoo of different AGN classes, it has been suggested that all AGN are the same type of object viewed from different angles(3). This model-called AGN unificati…	[Villarroel, Beatriz; Korn, Andreas J.] Uppsala Univ, Dept Phys & Astron, SE-75120 Uppsala, Sweden.|[Villarroel, Beatriz] Uppsala Univ, CIM, SE-75106 Uppsala, Sweden.	Villarroel, B (reprint author), Uppsala Univ, Dept Phys & Astron, SE-75120 Uppsala, Sweden.	beatriz.villarroel@physics.uu.se	Abazajian KN, 2009, ASTROPHYS J SUPPL S, V182, P543, DOI 10.1088/0067-0049/182/2/543|Lintott CJ, 2008, MON NOT R ASTRON SOC, V389, P1179, DOI 10.1111/j.1365-2966.2008.13689.x|Lintott C, 2011, MON NOT R ASTRON SOC, V410, P166, DOI 10.1111/j.1365-2966.2010.17432.x|York DG, 2000, ASTRON J, V120, P1579, DOI 10.1086/301513|Antonucci R, 2002, ASTR SOC P, V284, P147|ANTONUCCI R, 1993, ANNU REV ASTRON AS…	20	3	3	2	2	NATURE PUBLISHING GROUP	LONDON	MACMILLAN BUILDING, 4 CRINAN ST, LONDON N1 9XW, ENGLAND	1745-2473	1745-2481	NAT PHYS	Nat. Phys.	JUN	2014	10	417	420	10.1038/NPHYS2951	4	Physics, Multidisciplinary	Physics	AI6GG	WOS:000336969500016		Center of Interdisciplinary Mathematics; Crafoord Foundation; Swedish Royal Academy of Sciences; Alfred P. Sloan Foundation; National Science Foundation; US Department of Energy; Japanese Monbukagakusho; Max Planck Society	The authors wish to thank Y. Matsuoka and B. Gustafsson for invaluable feedback on the manuscript. B.V. wishes to thank R. Antonucci for engaged discussions that helped to improve the manuscript, as well as T. Konstantopoulos, E. van Groningen, J. Gonzales, A.J. Anderson, K. Szymanowski and J. Pianist. This work was funded and supported by the Center of Interdisciplinary Mathematics, the Crafoord…	6
	J	Fiske, IJ|Royle, JA|Gross, K	Fiske, Ian J.|Royle, J. Andrew|Gross, Kevin	Inference for finite-sample trajectories in dynamic multi-state site-occupancy models using hidden Markov model smoothing	ENVIRONMENTAL AND ECOLOGICAL STATISTICS	English	Article	Amphibians; Finite-sample trajectory; Hidden Markov model; Occupancy; Trend estimation; Wildlife	AMPHIBIAN-MONITORING-PROGRAM; PROBABILISTIC FUNCTIONS; MULTIPLE STATES; EXTINCTION; EXTENSION; UNCERTAIN; TRENDS	Ecologists and wildlife biologists increasingly use latent variable models to study patterns of species occurrence when detection is imperfect. These models have recently been generalized to accommodate both a more expansive description of state than simple presence or absence, and Markovian dynamics in the latent state over successive sampling seasons. In this paper, we write these multi-season,…	[Fiske, Ian J.; Gross, Kevin] N Carolina State Univ, Dept Stat, Raleigh, NC 27695 USA.|[Royle, J. Andrew] USGS Patuxent Wildlife Res Ctr, Laurel, MD 12100 USA.	Gross, K (reprint author), N Carolina State Univ, Dept Stat, Raleigh, NC 27695 USA.	kevin_gross@ncsu.edu	Agresti A., 2002, WILEY SERIES PROBABI|Altman RM, 2007, J AM STAT ASSOC, V102, P201, DOI 10.1198/016214506000001086|MacKenzie DI, 2003, ECOLOGY, V84, P2200, DOI 10.1890/02-3090|Ephraim Y, 2002, IEEE T INFORM THEORY, V48, P1518, DOI 10.1109/TIT.2002.1003838|BAUM LE, 1970, ANN MATH STAT, V41, P164, DOI 10.1214/aoms/1177697196|MacKenzie DI, 2002, ECOLOGY, V83, P2248, DOI 10.2307/3072056|Fujiwara M, …	33	1	1	9	18	SPRINGER	DORDRECHT	VAN GODEWIJCKSTRAAT 30, 3311 GZ DORDRECHT, NETHERLANDS	1352-8505	1573-3009	ENVIRON ECOL STAT	Environ. Ecol. Stat.	JUN	2014	21	313	328	10.1007/s10651-013-0256-1	16	Environmental Sciences; Mathematics, Interdisciplinary Applications; Statistics & Probability	Environmental Sciences & Ecology; Mathematics	AH3OM	WOS:000336033800007		National Science Foundation [DEB 08-42101]	We thank Linda Weir of PWRC for providing NAAMP data, and we thank John Monahan, Brian Reich and Len Stefanski for constructive comments and discussion. IJF and KG were supported by Grant DEB 08-42101 from the National Science Foundation.	2
	J	Hill, JM|Egan, JF|Stauffer, GE|Diefenbach, DR	Hill, Jason M.|Egan, J. Franklin|Stauffer, Glenn E.|Diefenbach, Duane R.	Habitat Availability Is a More Plausible Explanation than Insecticide Acute Toxicity for US Grassland Bird Species Declines	PLOS ONE	English	Article		LAND-USE; BREEDING BIRDS; FARMLAND BIRDS; UNITED-STATES; AGRICULTURAL LANDSCAPES; PATCH SIZE; COUNT DATA; CONSERVATION; POPULATIONS; MANAGEMENT	Grassland bird species have experienced substantial declines in North America. These declines have been largely attributed to habitat loss and degradation, especially from agricultural practices and intensification (the habitat-availability hypothesis). A recent analysis of North American Breeding Bird Survey (BBS) "grassland breeding'' bird trends reported the surprising conclusion that insectic…	[Hill, Jason M.; Stauffer, Glenn E.] Penn State Univ, Penn Cooperat Fish & Wildlife Res Unit, University Pk, PA 16802 USA.|[Egan, J. Franklin] ARS, USDA, Pasture Syst & Watershed Management Res Unit, University Pk, PA USA.|[Diefenbach, Duane R.] Penn State Univ, Penn Cooperat Fish & Wildlife Res Unit, US Geol Survey, University Pk, PA 16802 USA.	Hill, JM (reprint author), Penn State Univ, Penn Cooperat Fish & Wildlife Res Unit, University Pk, PA 16802 USA.	jmh656@psu.edu	Foley JA, 2005, SCIENCE, V309, P570, DOI 10.1126/science.1111772|Boody G, 2005, BIOSCIENCE, V55, P27, DOI 10.1641/0006-3568(2005)055[0027:MAITUS]2.0.CO;2|Graham MH, 2003, ECOLOGY, V84, P2809, DOI 10.1890/02-3114|Arnold TW, 2010, J WILDLIFE MANAGE, V74, P1175, DOI 10.2193/2009-367|Askins RA, 2007, ORNITHOL MONOGR, piii, DOI [10.2307/40166905, DOI 10.2307/40166905]|Atwell RC, 2011, ECOL SOC, V16, P…	82	3	3	12	26	PUBLIC LIBRARY SCIENCE	SAN FRANCISCO	1160 BATTERY STREET, STE 100, SAN FRANCISCO, CA 94111 USA	1932-6203		PLOS ONE	PLoS One	MAY 20	2014	9			10.1371/journal.pone.0098064	8	Multidisciplinary Sciences	Science & Technology - Other Topics	AM0UW	WOS:000339563400090				5	e98064	24846309
	J	Bizyaev, DV|Kautsch, SJ|Mosenkov, AV|Reshetnikov, VP|Sotnikova, NY|Yablokova, NV|Hillyer, RW	Bizyaev, D. V.|Kautsch, S. J.|Mosenkov, A. V.|Reshetnikov, V. P.|Sotnikova, N. Ya.|Yablokova, N. V.|Hillyer, R. W.	THE CATALOG OF EDGE-ON DISK GALAXIES FROM SDSS. I. THE CATALOG AND THE STRUCTURAL PARAMETERS OF STELLAR DISKS	ASTROPHYSICAL JOURNAL	English	Article	galaxies: fundamental parameters; galaxies: general; galaxies: photometry; galaxies: spiral; galaxies: structure	DIGITAL SKY SURVEY; SPIRAL GALAXIES; DATA RELEASE; SURFACE PHOTOMETRY; RADIATIVE-TRANSFER; DUST DISTRIBUTION; GALACTIC DISKS; S0 GALAXIES; THICK DISKS; COLOR	We present a catalog of true edge-on disk galaxies automatically selected from the Seventh Data Release of the Sloan Digital Sky Survey (SDSS). A visual inspection of the g, r, and i images of about 15,000 galaxies allowed us to split the initial sample of edge-on galaxy candidates into 4768 (31.8% of the initial sample) genuine edge-on galaxies, 8350 (55.7%) non-edge-on galaxies, and 1865 (12.5%…	[Bizyaev, D. V.] Apache Point Observ, Sunspot, NM 88349 USA.|[Bizyaev, D. V.] New Mexico State Univ, Sunspot, NM 88349 USA.|[Bizyaev, D. V.] Moscow MV Lomonosov State Univ, Sternberg Astron Inst, Moscow, Russia.|[Kautsch, S. J.] Nova SE Univ, Ft Lauderdale, FL 33314 USA.|[Mosenkov, A. V.] RAS, Cent Astron Observ, Moscow, Russia.|[Mosenkov, A. V.; Reshetnikov, V. P.; Sotnikova, N. Ya.; Yablokova, …	Bizyaev, DV (reprint author), Apache Point Observ, Sunspot, NM 88349 USA.		Abazajian KN, 2009, ASTROPHYS J SUPPL S, V182, P543, DOI 10.1088/0067-0049/182/2/543|Aihara H, 2011, ASTROPHYS J SUPPL S, V193, DOI 10.1088/0067-0049/193/2/29|Stoughton C, 2002, ASTRON J, V123, P485, DOI 10.1086/324741|Strateva I, 2001, ASTRON J, V122, P1861, DOI 10.1086/323301|Lintott C, 2011, MON NOT R ASTRON SOC, V410, P166, DOI 10.1111/j.1365-2966.2010.17432.x|Schlegel DJ, 1998, ASTROPHYS J, …	50	3	3	1	4	IOP PUBLISHING LTD	BRISTOL	TEMPLE CIRCUS, TEMPLE WAY, BRISTOL BS1 6BE, ENGLAND	0004-637X	1538-4357	ASTROPHYS J	Astrophys. J.	MAY 20	2014	787			10.1088/0004-637X/787/1/24	12	Astronomy & Astrophysics	Astronomy & Astrophysics	AH2AX	WOS:000335924200024		AAS Small Research grant program [RFBR-11-02-12247, RFBR-11-02- 00471, RFBR-12-0200685, RFBR-14-02-00810]; Nova Southeastern University President's Faculty Research and Development Grant; Alfred P. Sloan Foundation; National Science Foundation; US Department of Energy Office of Science; SDSS-III Collaboration; University of Arizona; Brazilian Participation Group; Brookhaven National Laboratory; U…	We thank AAS Small Research grant program and grants RFBR-11-02-12247, RFBR-11-02- 00471, RFBR-12-0200685, and RFBR-14-02-00810 for support. Funding for this project was partly provided through the Nova Southeastern University President's Faculty Research and Development Grant. We thank the anonymous referee whose multiple reviews significantly improved the paper.Funding for SDSS-III has been pro…	1	24		Reshetnikov, Vladimir/0000-0002-2987-7995	Reshetnikov, Vladimir/J-7261-2012
	J	Forcey, GM|Thogmartin, WE|Linz, GM|McKann, PC	Forcey, Greg M.|Thogmartin, Wayne E.|Linz, George M.|McKann, Patrick C.	Land use and climate affect Black Tern, Northern Harrier, and Marsh Wren abundance in the Prairie Pothole Region of the United States	CONDOR	English	Article	abundance maps; Bayesian; hierarchical models; Markov chain Monte Carlo; North American Breeding Bird Survey; Prairie Pothole Region; wetland birds	BREEDING BIRD SURVEY; RED-WINGED BLACKBIRDS; GRASSLAND BIRDS; HIERARCHICAL ANALYSIS; CERULEAN WARBLERS; POPULATION-CHANGE; AVIAN ABUNDANCE; LANDSCAPE-SCALE; COVER DATA; MODEL	Bird populations are influenced by many environmental factors at both large and small scales. Our study evaluated the influences of regional climate and land-use variables on the Northern Harrier (Circus cyaneus), Black Tern (Childonias niger), and Marsh Wren (Cistothorus palustris) in the prairie potholes of the upper Midwest of the United States. These species were chosen because their diverse …	[Forcey, Greg M.] N Dakota State Univ, Dept Biol Sci, Fargo, ND 58105 USA.|[Thogmartin, Wayne E.; McKann, Patrick C.] US Geol Survey, Upper Midwest Environm Sci Ctr, La Crosse, WI USA.|[Linz, George M.] Wildlife Serv, USDA, Natl Wildlife Res Ctr, Bismarck, ND USA.	Forcey, GM (reprint author), Normandeau Associates, Gainesville, FL 32601 USA.	research@gregforcey.com	Akinremi OO, 1999, J CLIMATE, V12, P2996, DOI 10.1175/1520-0442(1999)012<2996:PTOTCP>2.0.CO;2|ANDERSON J. R., 1976, 964 GEOL SURV|Urban DL, 2005, ECOLOGY, V86, P1996, DOI 10.1890/04-0918|Spiegelhalter DJ, 2002, J ROY STAT SOC B, V64, P583, DOI 10.1111/1467-9868.00353|Brooks SP, 1998, J COMPUT GRAPH STAT, V7, P434, DOI 10.2307/1390675|Sauer JR, 2003, J WILDLIFE MANAGE, V67, P372, DOI 10.2307/38027…	66	1	1	7	30	COOPER ORNITHOLOGICAL SOC	LAWRENCE	ORNITHOLOGICAL SOC NORTH AMER PO BOX 1897, LAWRENCE, KS 66044-8897 USA	0010-5422	1938-5129	CONDOR	Condor	MAY	2014	116	226	241	10.1650/CONDOR-13-019-R1.1	16	Ornithology	Zoology	AK0ID	WOS:000338095200008		National Wildlife Research Center (NWRC), a unit within the U.S. Department of Agriculture, Animal Plant and Health Inspection Service, Wildlife Services (WS); Department of Biological Sciences; Graduate School at North Dakota State University	We thank William J. Bleier, Mario E. Biondini, Gary K. Clambey, and Gary L. Nuechterlein for their contributions to and advice on this study. David Anderson, Diane Granfors, Rex Johnson, Neal Niemuth, and John Sauer provided suggestions on the data analyses for this project. We also thank Eric O'Neal for providing ArcGIS plug-ins to simplify the spatial analyses of climate and land-use data. Thou…	2
	J	Hernandez-Farinas, T|Soudant, D|Barille, L|Belin, C|Lefebvre, A|Bacher, C	Hernandez-Farinas, Tania|Soudant, Dominique|Barille, Laurent|Belin, Catherine|Lefebvre, Alain|Bacher, Cedric	Temporal changes in the phytoplankton community along the French coast of the eastern English Channel and the southern Bight of the North Sea	ICES JOURNAL OF MARINE SCIENCE	English	Article	climatic indicators; dynamic linear model; environmental drivers; multivariate analysis; phytoplankton	ATLANTIC MULTIDECADAL OSCILLATION; LONG-TERM CHANGES; CLIMATE-CHANGE; BALTIC SEA; MARINE SYSTEMS; ECOLOGY; WESTERN; VARIABILITY; NUTRIENTS; EUROPE	Long-term trends in the phytoplankton community along the French coast of the English Channel and southern Bight of the North Sea were studied and related to physico-chemical factors and large-climatic indices. Phytoplankton and hydrological data were acquired through three transects. Sampling took place between 1992 and 2011 as part of the French Phytoplankton Monitoring Network (REPHY) and the …	[Hernandez-Farinas, Tania; Soudant, Dominique; Belin, Catherine] IFREMER, Dyneco VIGIES, F-44311 Nantes 03, France.|[Barille, Laurent] Univ Nantes, Fac Sci & Tech, F-44322 Nantes 3, France.|[Lefebvre, Alain] IFREMER, LER, F-62321 Boulogne Sur Mer, France.|[Bacher, Cedric] IFREMER, Dyneco BENTHOS, F-29280 Plouzane, France.	Hernandez-Farinas, T (reprint author), IFREMER, Dyneco VIGIES, Rue Ile Yeu,BP 21105, F-44311 Nantes 03, France.	tania.hernandez.farinas@ifremer.fr	Aminot A, 2007, DOSAGE AUTOMATIQUE N|Aminot A, 2004, HYDROLOGIE ECOSYSTEM|Amzil Z, 2001, TOXICON, V39, P1245, DOI 10.1016/S0041-0101(01)00096-4|Trigo RM, 2002, CLIMATE RES, V20, P9, DOI 10.3354/cr020009|Enfield DB, 2001, GEOPHYS RES LETT, V28, P2077, DOI 10.1029/2000GL012745|Rodwell MJ, 1999, NATURE, V398, P320, DOI 10.1038/18648|Hurrell JW, 2009, J MARINE SYST, V78, P28, DOI 10.1016/j.jmarsys.20…	57	2	2	14	45	OXFORD UNIV PRESS	OXFORD	GREAT CLARENDON ST, OXFORD OX2 6DP, ENGLAND	1054-3139	1095-9289	ICES J MAR SCI	ICES J. Mar. Sci.	MAY-JUN	2014	71	821	833	10.1093/icesjms/fst192	13	Fisheries; Marine & Freshwater Biology; Oceanography	Fisheries; Marine & Freshwater Biology; Oceanography	AH9AH	WOS:000336430200008		Fondation de France; IFREMER; Regional Water Agency; DREAL Artois-Picardie	This research has been supported by Fondation de France and IFREMER. The SRN was partly supported by the Regional Water Agency and the DREAL Artois-Picardie. We want to thank all members of the REPHY program and the SRN network for providing expertise support especially to Pascale Hebert, Camille Blondel, and Vincent Duquesne at the Institute for the Exploitation for the Sea (IFREMER), Boulogne s…	4
	J	van Vliet, AJH|Bron, WA|Mulder, S	van Vliet, Arnold J. H.|Bron, Wichertje A.|Mulder, Sara	The how and why of societal publications for citizen science projects and scientists	INTERNATIONAL JOURNAL OF BIOMETEOROLOGY	English	Article	Societal publications; Citizen science; Phenology; Media attention	CLIMATE-CHANGE; MASS-MEDIA; COMMUNICATION; BARRIERS; ENGAGEMENT; NEWS	In the scientific community, the importance of communication to society is often underestimated. Scientists and scientific organisations often lack the skills to organise such communication effectively. The Dutch citizen science phenology network Nature's Calendar has been successful in communicating to the general public via numerous newspaper articles, television appearances, presentations, web…	[van Vliet, Arnold J. H.; Bron, Wichertje A.] Wageningen Univ, Environm Syst Anal Grp, NL-6700 AA Wageningen, Netherlands.|[van Vliet, Arnold J. H.; Bron, Wichertje A.; Mulder, Sara] Fdn Sustainable Dev, NL-6700 AN Wageningen, Netherlands.	van Vliet, AJH (reprint author), Fdn Sustainable Dev, POB 570, NL-6700 AN Wageningen, Netherlands.	Arnold.vanVliet@wur.nl	Penuelas J, 2013, GLOBAL CHANGE BIOL, V19, P2303, DOI 10.1111/gcb.12143|Menzel A, 2006, GLOBAL CHANGE BIOL, V12, P1969, DOI 10.1111/j.1365-2486.2006.01193.x|Bentley P, 2011, PUBLIC UNDERST SCI, V20, P48, DOI 10.1177/0963662510384461|Besley JC, 2011, SCI COMMUN, V33, P239, DOI 10.1177/1075547010386972|Colson V, 2011, JOURNALISM, V12, P889, DOI 10.1177/1464884911412834|Cosquer A, 2012, ECOL SOC, V1…	22	0	0	21	57	SPRINGER	NEW YORK	233 SPRING ST, NEW YORK, NY 10013 USA	0020-7128	1432-1254	INT J BIOMETEOROL	Int. J. Biometeorol.	MAY	2014	58	565	577	10.1007/s00484-014-0821-9	13	Biophysics; Environmental Sciences; Meteorology & Atmospheric Sciences; Physiology	Biophysics; Environmental Sciences & Ecology; Meteorology & Atmospheric Sciences; Physiology	AH7QU	WOS:000336329300014				4		24705824
	J	Kusbach, A|Van Miegroet, H|Boettinger, JL|Long, JN	Kusbach, Antonin|Van Miegroet, Helga|Boettinger, Janis L.|Long, James N.	Vegetation geo-climatic zonation in the rocky mountains, Northern Utah, USA	JOURNAL OF MOUNTAIN SCIENCE	English	Article	Ecological classification; Ecosystem survey; Land classification; Zonal concept; Vegetation zone; Vegetation geo-climatic zone; Climate change	BIOGEOCLIMATIC ECOSYSTEM CLASSIFICATION; ASPEN POPULUS-TREMULOIDES; DOUGLAS-FIR SEEDLINGS; LAND CLASSIFICATION; TRANSITION MODELS; RHIZOSPHERE PH; COLORADO; ECOLOGY; FORESTS; PATTERN	We developed a vegetation geo-climatic zonation incorporating the zonal concept, gradient and discriminant analysis in Wasatch Range, northern Utah, USA. Mountainous forest ecosystems were sampled and described by vegetation, physiographic features and soil properties. The Snowpack Telemetry and National Weather Service Cooperative Observer Program weather station networks were used to approximat…	[Kusbach, Antonin; Van Miegroet, Helga; Boettinger, Janis L.; Long, James N.] Utah State Univ, Dept Wildland Resources, Logan, UT 84322 USA.|[Kusbach, Antonin; Van Miegroet, Helga; Boettinger, Janis L.; Long, James N.] Utah State Univ, Ctr Ecol, Logan, UT 84322 USA.|[Kusbach, Antonin] Mendel Univ Brno, Dept Forest Bot Dendrol & Geobiocoenol, Brno 61300, Czech Republic.	Kusbach, A (reprint author), Utah State Univ, Dept Wildland Resources, 5230 Old Main Hill, Logan, UT 84322 USA.	tony.kusbach@usu.edu	Abella SR, 2009, CAN J FOREST RES, V39, P2391, DOI 10.1139/X09-146|Anderson S. E., 2006, Proceedings of the IASTED International Conference on Computational Intelligence|WISHART D, 1969, BIOMETRICS, V25, P165, DOI 10.2307/2528688|Breiman L, 2001, MACH LEARN, V45, P5, DOI 10.1023/A:1010933404324|Schoenholtz SH, 2000, FOREST ECOL MANAG, V138, P335, DOI 10.1016/S0378-1127(00)00423-0|Tichy L, 2002, J…	115	1	1	2	17	SCIENCE PRESS	BEIJING	16 DONGHUANGCHENGGEN NORTH ST, BEIJING 100717, PEOPLES R CHINA	1672-6316	1993-0321	J MT SCI-ENGL	J Mt. Sci.	MAY	2014	11	656	673	10.1007/s11629-013-2793-3	18	Environmental Sciences	Environmental Sciences & Ecology	AH7NB	WOS:000336319100008		Ecology Center; United States Department of Agriculture (USDA) Forest Service; Wasatch-Cache National Forest; Forest Supervisor's Office; Utah Agricultural Experiment Station, Utah State University, USA	This research was supported in part by the Ecology Center, United States Department of Agriculture (USDA) Forest Service, Wasatch-Cache National Forest, Forest Supervisor's Office, and the Utah Agricultural Experiment Station, Utah State University, USA and approved as journal paper no. 8235. We thank Western Ag Innovations for PRS (TM)-probes and related soil issues consultations; Randall Juland…	3
	J	Coughlin, JL|Thompson, SE|Bryson, ST|Burke, CJ|Caldwell, DA|Christiansen, JL|Haas, MR|Howell, SB|Jenkins, JM|Kolodziejczak, JJ|Mullally, FR|Rowe, JF	Coughlin, Jeffrey L.|Thompson, Susan E.|Bryson, Stephen T.|Burke, Christopher J.|Caldwell, Douglas A.|Christiansen, Jessie L.|Haas, Michael R.|Howell, Steve B.|Jenkins, Jon M.|Kolodziejczak, Jeffery J.|Mullally, Fergal R.|Rowe, Jason F.	CONTAMINATION IN THE KEPLER FIELD. IDENTIFICATION OF 685 KOIs AS FALSE POSITIVES VIA EPHEMERIS MATCHING BASED ON Q1-Q12 DATA	ASTRONOMICAL JOURNAL	English	Article	binaries: eclipsing; instrumentation: detectors; planetary systems; planets and satellites: detection; stars: statistics; techniques: photometric	ECLIPSING BINARIES; PLANET HUNTERS; DATA RELEASE; VALIDATION; CATALOG; SYSTEMS	The Kepler mission has to date found almost 6000 planetary transit-like signals, utilizing three years of data for over 170,000 stars at extremely high photometric precision. Due to its design, contamination from eclipsing binaries, variable stars, and other transiting planets results in a significant number of these signals being false positives (FPs). This directly affects the determination of …	[Coughlin, Jeffrey L.; Thompson, Susan E.; Burke, Christopher J.; Caldwell, Douglas A.; Jenkins, Jon M.; Mullally, Fergal R.; Rowe, Jason F.] SETI Inst, Mountain View, CA 94043 USA.|[Coughlin, Jeffrey L.; Thompson, Susan E.; Bryson, Stephen T.; Burke, Christopher J.; Caldwell, Douglas A.; Haas, Michael R.; Howell, Steve B.; Jenkins, Jon M.; Mullally, Fergal R.; Rowe, Jason F.] NASA, Ames Res Ctr,…	Coughlin, JL (reprint author), SETI Inst, 189 Bernardo Ave, Mountain View, CA 94043 USA.	jeffrey.l.coughlin@nasa.gov	Bryson ST, 2013, PUBL ASTRON SOC PAC, V125, P889, DOI 10.1086/671767|Borucki WJ, 2010, SCIENCE, V327, P977, DOI 10.1126/science.1185402|Christiansen JL, 2012, PUBL ASTRON SOC PAC, V124, P1279, DOI 10.1086/668847|Batalha NM, 2010, ASTROPHYS J LETT, V713, pL109, DOI 10.1088/2041-8205/713/2/L109|Batalha NM, 2013, ASTROPHYS J SUPPL S, V204, DOI 10.1088/0067-0049/204/2/24|Borucki WJ, 2011, ASTROPHYS J…	24	18	18	0	3	IOP PUBLISHING LTD	BRISTOL	TEMPLE CIRCUS, TEMPLE WAY, BRISTOL BS1 6BE, ENGLAND	0004-6256	1538-3881	ASTRON J	Astron. J.	MAY	2014	147			10.1088/0004-6256/147/5/119	12	Astronomy & Astrophysics	Astronomy & Astrophysics	AF3DO	WOS:000334591900026		NASA [NAS5-26555]; NASA Office of Space Science [NNX09AF08G]; NASA Science Mission directorate	We thank the anonymous referee for his or her very helpful comments, which especially helped to improve the clarity of the paper. This research has made use of the NASA Exoplanet Archive, which is operated by the California Institute of Technology, under contract with the National Aeronautics and Space Administration under the Exoplanet Exploration Program. This research has made use of NASA's As…	5	119		Caldwell, Douglas/0000-0003-1963-9616	Caldwell, Douglas/L-7911-2014
	J	Schawinski, K|Urry, CM|Simmons, BD|Fortson, L|Kaviraj, S|Keel, WC|Lintott, CJ|Masters, KL|Nichol, RC|Sarzi, M|Skibba, R|Treister, E|Willett, KW|Wong, OI|Yi, SK	Schawinski, Kevin|Urry, C. Megan|Simmons, Brooke D.|Fortson, Lucy|Kaviraj, Sugata|Keel, William C.|Lintott, Chris J.|Masters, Karen L.|Nichol, Robert C.|Sarzi, Marc|Skibba, Ramin|Treister, Ezequiel|Willett, Kyle W.|Wong, O. Ivy|Yi, Sukyoung K.	The green valley is a red herring: Galaxy Zoo reveals two evolutionary pathways towards quenching of star formation in early- and late-type galaxies star	MONTHLY NOTICES OF THE ROYAL ASTRONOMICAL SOCIETY	English	Article	galaxies: active; galaxies: elliptical and lenticular; cD; galaxies: evolution; galaxies: spiral	ACTIVE GALACTIC NUCLEI; DIGITAL-SKY-SURVEY; SIMILAR-TO 1; COLOR-MAGNITUDE DIAGRAM; SUPERMASSIVE BLACK-HOLES; SURVEY IMAGING DATA; X-RAY BINARIES; FORMING GALAXIES; DISC GALAXIES; HOST GALAXIES	We use SDSS+GALEX+Galaxy Zoo data to study the quenching of star formation in low-redshift galaxies. We show that the green valley between the blue cloud of star-forming galaxies and the red sequence of quiescent galaxies in the colour-mass diagram is not a single transitional state through which most blue galaxies evolve into red galaxies. Rather, an analysis that takes morphology into account m…	[Schawinski, Kevin] ETH, Inst Astron, Dept Phys, CH-8093 Zurich, Switzerland.|[Urry, C. Megan] Yale Univ, Dept Phys, New Haven, CT 06520 USA.|[Urry, C. Megan] Yale Univ, Yale Ctr Astron & Astrophys, New Haven, CT 06520 USA.|[Urry, C. Megan] Yale Univ, Dept Astron, New Haven, CT 06520 USA.|[Simmons, Brooke D.; Lintott, Chris J.] Oxford Astrophys, Oxford OX1 3RH, England.|[Fortson, Lucy; Willett, K…	Schawinski, K (reprint author), ETH, Inst Astron, Dept Phys, Wolfgang Pauli Str 27, CH-8093 Zurich, Switzerland.	kevin.schawinski@phys.ethz.ch	Abazajian KN, 2009, ASTROPHYS J SUPPL S, V182, P543, DOI 10.1088/0067-0049/182/2/543|Noeske KG, 2007, ASTROPHYS J, V660, pL43, DOI 10.1086/517926|Bruzual G, 2003, MON NOT R ASTRON SOC, V344, P1000, DOI 10.1046/j.1365-8711.2003.06897.x|Wong OI, 2012, MON NOT R ASTRON SOC, V420, P1684, DOI 10.1111/j.1365-2966.2011.20159.x|Lintott CJ, 2008, MON NOT R ASTRON SOC, V389, P1179, DOI 10.1111/j.1365-2966.…	125	48	48	3	12	OXFORD UNIV PRESS	OXFORD	GREAT CLARENDON ST, OXFORD OX2 6DP, ENGLAND	0035-8711	1365-2966	MON NOT R ASTRON SOC	Mon. Not. Roy. Astron. Soc.	MAY	2014	440	889	907	10.1093/mnras/stu327	19	Astronomy & Astrophysics	Astronomy & Astrophysics	AF4OD	WOS:000334691900069		Swiss National Science Foundation [PP00P2_ 138979/1]; Oxford Martin School and Worcester College, Oxford; Microsoft and The Leverhulme Trust; STFC [ST/I001204/1]; National Research Foundation of Korea [2010-0027910]; Korea Research Council of Fundamental Science and Technology; Center of Excellence inAstrophysics and Associated Technologies [PFB 06]; FONDECYT [1120061]; Anillo project [ACT1101]; …	KS gratefully acknowledges support from Swiss National Science Foundation Grant PP00P2_ 138979/1. BDS acknowledges support from the Oxford Martin School and Worcester College, Oxford. The development of Galaxy Zoo was supported by a Jim Gray grant from Microsoft and The Leverhulme Trust. RCN acknowledges STFC Rolling Grant ST/I001204/1 'Survey Cosmology and Astrophysics'. SKY acknowledges the sup…	1
	J	Aagaard, K|Lockwood, J	Aagaard, Kevin|Lockwood, Julie	Exotic birds show lags in population growth	DIVERSITY AND DISTRIBUTIONS	English	Article	population dynamics; piecewise models; lag phases; biological invasions; exotic birds; Audubon Christmas Bird Counts	PLANT INVASIONS; ESTABLISHMENT SUCCESS; COUNT DATA; ECOLOGY; MANAGEMENT; PHASES; TIMES	Aim A key aspect of the ecology and management of biological invasions is the prevalence and duration of lag phases in population growth. Here, we explore the occurrence of lag phases in exotic bird populations using the Audubon Christmas Bird Count database. Location Hawaiian Island archipelago. Methods We expand on the use of piecewise model fitting techniques to detect lags in exotic bird popu…	[Aagaard, Kevin; Lockwood, Julie] Rutgers State Univ, Dept Ecol Evolut & Nat Resources, Grad Program Ecol & Evolut, New Brunswick, NJ 08901 USA.	Aagaard, K (reprint author), Rutgers State Univ, Dept Ecol Evolut & Nat Resources, Grad Program Ecol & Evolut, New Brunswick, NJ 08901 USA.	aagaard@scarletmail.rutgers.edu	Aikio S, 2010, OIKOS, V119, P370, DOI 10.1111/j.1600-0706.2009.17963.x|Crooks JA, 2005, ECOSCIENCE, V12, P316, DOI 10.2980/i1195-6860-12-3-316.1|BENNETT P. M., 2002, EVOLUTIONARY ECOLOGY|Blackburn TM, 2009, GLOBAL CHANGE BIOL, V15, P2852, DOI 10.1111/j.1365-2486.2008.01841.x|Burnham KP, 2002, MODEL SELECTION MULT|Cassey P, 2002, BIOL J LINN SOC, V76, P465, DOI 10.1046/j.1095-8312.2002.00086.x|Clo…	22	2	2	9	28	WILEY-BLACKWELL	HOBOKEN	111 RIVER ST, HOBOKEN 07030-5774, NJ USA	1366-9516	1472-4642	DIVERS DISTRIB	Divers. Distrib.	MAY	2014	20	547	554	10.1111/ddi.12175	8	Biodiversity Conservation; Ecology	Biodiversity & Conservation; Environmental Sciences & Ecology	AE4CF	WOS:000333926300006				5
	J	Lute, AC|Abatzoglou, JT	Lute, A. C.|Abatzoglou, J. T.	Role of extreme snowfall events in interannual variability of snowfall accumulation in the western United States	WATER RESOURCES RESEARCH	English	Article	snow; climate variability; extreme events; hydroclimatology	DECLINING MOUNTAIN SNOWPACK; TELEMETRY SNOTEL DATA; NORTH-AMERICA; CLIMATE-CHANGE; WATER-RESOURCES; PRECIPITATION; ENSO; FREQUENCIES; SUBLIMATION; IMPACTS	Water resources in the western United States are contingent on interannual variations in snowpack. Interannual snowpack variability has been attributed to large-scale climate patterns including the El Nino-Southern Oscillation (ENSO), however, the contribution of snowfall frequency and extreme snowfall events to this variability are less well quantified. Long-term records from Snowpack Telemetry …	[Lute, A. C.] Univ Idaho, Water Resources Program, Moscow, ID 83843 USA.|[Abatzoglou, J. T.] Univ Idaho, Dept Geog, Moscow, ID 83843 USA.	Lute, AC (reprint author), Univ Idaho, Water Resources Program, Moscow, ID 83843 USA.	lute8816@vandals.uidaho.edu	Abatzoglou JT, 2011, INT J CLIMATOL, V31, P1135, DOI 10.1002/joc.2137|Mote PW, 2005, B AM METEOROL SOC, V86, P39, DOI 10.1175/BAMS-86-1-39|Mote PW, 2006, J CLIMATE, V19, P6209, DOI 10.1175/JCLI3971.1|Dettinger MD, 1998, J CLIMATE, V11, P3095, DOI 10.1175/1520-0442(1998)011<3095:NSPPIW>2.0.CO;2|Barnett TP, 2005, NATURE, V438, P303, DOI 10.1038/nature04141|Stewart IT, 2004, CLIMATIC CHANGE, V62, P2…	43	2	2	5	14	AMER GEOPHYSICAL UNION	WASHINGTON	2000 FLORIDA AVE NW, WASHINGTON, DC 20009 USA	0043-1397	1944-7973	WATER RESOUR RES	Water Resour. Res.	APR	2014	50	2874	2888	10.1002/2013WR014465	15	Environmental Sciences; Limnology; Water Resources	Environmental Sciences & Ecology; Marine & Freshwater Biology; Water Resources	AH3LV	WOS:000336026000007		National Science Foundation Idaho EPSCoR Program [EPS-0814387]; National Science Foundation [ATM-0801474]; NOAA [NA10OAR4310218]	Many thanks to Katherine Hegewisch and Renaud Barbero for their mentoring and support. Conversations with Ron Abramovich and Jeff Anderson of the NRCS contributed to development of quality control procedures. We would also like to thank three anonymous reviewers who helped improve the quality of our manuscript. SNOTEL data were obtained from the USDA NRCS Snow Survey website. COOP data were obtai…	4
	J	Cummings, K|Veech, JA	Cummings, Katherine|Veech, Joseph A.	Assessing the influence of geography, land cover and host species on the local abundance of a generalist brood parasite, the brown- headed cowbird	DIVERSITY AND DISTRIBUTIONS	English	Article	Conservation; geographic range; grassland; habitat; songbird; spatial autocorrelation	BREEDING BIRD SURVEY; MOLOTHRUS-ATER; SIERRA-NEVADA; SPATIAL-ANALYSIS; PATTERNS; HABITAT; MACROECOLOGY; POPULATIONS; LANDSCAPES; SELECTION	AimThe brown-headed cowbird is an obligate brood parasite known to exploit a large number of host species and use a variety of habitats. Much attention has been directed towards uncovering the fundamental factors that affect cowbird abundance; however, no study has evaluated these factors in the context of a biogeographic-scale analysis that takes into account spatial autocorrelation. Our primary…	[Cummings, Katherine; Veech, Joseph A.] Texas State Univ, Dept Biol, San Marcos, TX 78666 USA.	Veech, JA (reprint author), Texas State Univ, Dept Biol, 601 Univ Dr, San Marcos, TX 78666 USA.	joseph.veech@txstate.edu	Anderson KE, 2012, AUK, V129, P307, DOI 10.1525/auk.2012.11164|Anderson KE, 2005, AUK, V122, P803, DOI 10.1642/0004-8038(2005)122[0803:LMPBSD]2.0.CO;2|ROBINSON SK, 1995, SCIENCE, V267, P1987, DOI 10.1126/science.267.5206.1987|Dormann CF, 2007, ECOGRAPHY, V30, P609, DOI 10.1111/j.2007.0906-7590.05171.x|Sauer JR, 2003, J WILDLIFE MANAGE, V67, P372, DOI 10.2307/3802778|Rangel TF, 2010, ECOGRAPHY, V3…	50	0	0	5	22	WILEY-BLACKWELL	HOBOKEN	111 RIVER ST, HOBOKEN 07030-5774, NJ USA	1366-9516	1472-4642	DIVERS DISTRIB	Divers. Distrib.	APR	2014	20	396	404	10.1111/ddi.12139	9	Biodiversity Conservation; Ecology	Biodiversity & Conservation; Environmental Sciences & Ecology	AC3UE	WOS:000332445900003				4
	J	Dojcsak, L|Shamir, L	Dojcsak, Levente|Shamir, Lior	Quantitative analysis of spirality in elliptical galaxies	NEW ASTRONOMY	English	Article	Galaxies: elliptical and lenticular; Techniques: image processing	DIGITAL-SKY-SURVEY; SPHEROIDAL GALAXIES; DATA RELEASE; ZOO; MORPHOLOGIES; ALGORITHM; CATALOG	We use an automated galaxy morphology analysis method to quantitatively measure the spirality of galaxies classified manually as elliptical. The data set used for the analysis consists of 60,518 galaxy images with redshift obtained by the Sloan Digital Sky Survey (SDSS) and classified manually by Galaxy Zoo, as well as the RC3 and NA10 catalogues. We measure the spirality of the galaxies by using…	[Dojcsak, Levente] George Washington Univ, Dept Phys, St Louis, MO USA.|[Shamir, Lior] Lawrence Technol Univ, Dept Math & Comp Sci, Southfield, MI 48075 USA.	Shamir, L (reprint author), Lawrence Technol Univ, Dept Math & Comp Sci, 21000 W 10 Mile Rd, Southfield, MI 48075 USA.	lshamir@mtu.edu	Abraham RG, 2003, ASTROPHYS J, V588, P218, DOI 10.1086/373919|Lintott CJ, 2008, MON NOT R ASTRON SOC, V389, P1179, DOI 10.1111/j.1365-2966.2008.13689.x|Lintott C, 2011, MON NOT R ASTRON SOC, V410, P166, DOI 10.1111/j.1365-2966.2010.17432.x|Ball NM, 2008, MON NOT R ASTRON SOC, V383, P907, DOI 10.1111/j.1365-2966.2007.12627.x|Ball NM, 2008, ASTROPHYS J, V683, P12, DOI 10.1086/589646|Banerji M, 2010…	31	0	0	1	8	ELSEVIER SCIENCE BV	AMSTERDAM	PO BOX 211, 1000 AE AMSTERDAM, NETHERLANDS	1384-1076	1384-1092	NEW ASTRON	New Astron.	APR	2014	28	1	8	10.1016/j.newast.2013.09.006	8	Astronomy & Astrophysics	Astronomy & Astrophysics	263SV	WOS:000327829200001		Alfred P. Sloan Foundation; National Science Foundation; US Department of Energy; National Aeronautics and Space Administration; Japanese Monbukagakusho; Max Planck Society; Higher Education Funding Council for England; American Museum of Natural History; Astrophysical Institute Potsdam; University of Basel; University of Cambridge; Case 'Western Reserve University; University of Chicago; Drexel …	Funding for the SDSS and SDSS-II has been provided by the Alfred P. Sloan Foundation, the Participating Institutions, the National Science Foundation, the US Department of Energy, the National Aeronautics and Space Administration, the Japanese Monbukagakusho, the Max Planck Society, and the Higher Education Funding Council for England. The SDSS Web Site is http:// www.sdss.org/.The SDSS is manage…
	J	Bailey, RL|Clark, GE	Bailey, Robyn L.|Clark, Gerald E.	Occurrence of twin embryos in the eastern bluebird	PEERJ	English	Article	Pennsylvania; Pastern bluebird; Sialia sialis; Twinning; Double yolked egg; Citizen science	ALBUMIN SECRETION; EGGS	We report the first record of presumed twinning in eastern bluebird (Sialia sialis) and provide a review of previously reported twinning events in wild birds. A nest containing twin eastern bluebird nestlings was monitored in 2013 in central Pennsylvania and reported to the Cornell Lab of Ornithology's NestWatch program, a national program where volunteers submit data on wild nesting birds. A pre…	[Bailey, Robyn L.] Cornell Lab Ornithol, Ithaca, NY USA.	Bailey, RL (reprint author), Cornell Lab Ornithol, Ithaca, NY USA.	rb644@cornell.edu	Alley MR, 2002, NEW ZEAL VET J, V50, P39|ASTHEIMER LB, 1985, CONDOR, V87, P150, DOI 10.2307/1367150|Bassett SM, 1999, J ZOOL, V247, P475|BATT BDJ, 1975, CONDOR, V77, P214, DOI 10.2307/1365797|Berger AJ, 1953, CONDOR, V55, P157|Bernard C, 1850, CR HEBD ACAD SCI, V1, P9|Cartwright BW, 1939, CAN NAT, V53, P122|Conrad RM, 1940, POULTRY SCI, V19, P9, DOI [10.3382/ps.0190009, DOI 10.3382/PS.0190009]|Co…	25	0	0	4	4	PEERJ INC	LONDON	341-345 OLD ST, THIRD FLR, LONDON, EC1V 9LL, ENGLAND	2167-8359		PEERJ	PeerJ	2015-03-11	2014	2			10.7717/pcerj.273	10	Multidisciplinary Sciences	Science & Technology - Other Topics	AY4QK	WOS:000347563200001		Cornell Lab of Ornithology; National Science Foundation [0540185]	NestWatch supported by the Cornell Lab of Ornithology and was founded under the National Science Foundation grant No. 0540185. The funders had no role in study design, data collection and analysis, decision to publish, or preparation of the manuscript.		c273
	J	Stockman, BJ|Asheld, JS|Burburan, PJ|Galesic, A|Nawlo, Z|Sikorski, KF	Stockman, Brian J.|Asheld, Jill S.|Burburan, Paola J.|Galesic, Ana|Nawlo, Zohar|Sikorski, Kylie F.	Design and Characterization of a Zn2+-Binding Four-Helix Bundle Protein in the Biophysical Chemistry Laboratory	JOURNAL OF CHEMICAL EDUCATION	English	Article	Upper-Division Undergraduate; Biochemistry; Laboratory Instruction; Hands-On Learning/Manipulatives; Biophysical Chemistry; Electrophoresis; Molecular Modeling Molecular Recognition; Proteins/Peptides; NMR Spectroscopy	DE-NOVO DESIGN; COMPUTATIONAL DESIGN; SECONDARY STRUCTURE; HELICAL PROTEIN; PROTON NMR; BIOCHEMISTRY; PURIFICATION; RESOLUTION; AFFINITY; BIOLOGY	A biophysical chemistry laboratory project is described that combines classroom and laboratory experiences to design and characterize a Zn2+-binding four-helix bundle protein. The design phase involves re-examining principles of protein structure and function in the context of four-helix bundle literature and then using the online computer game Foldit to build and optimize a 35-residue helix-loop…	[Stockman, Brian J.; Asheld, Jill S.; Burburan, Paola J.; Galesic, Ana; Nawlo, Zohar; Sikorski, Kylie F.] Adelphi Univ, Dept Chem, Garden City, NY 11530 USA.	Stockman, BJ (reprint author), Adelphi Univ, Dept Chem, Garden City, NY 11530 USA.	bstockman@adelphi.edu	Tinberg CE, 2013, NATURE, V501, P212, DOI 10.1038/nature12443|[Anonymous], PYMOL MOL GRAPHICS S|SHERIFF S, 1987, J MOL BIOL, V197, P273, DOI 10.1016/0022-2836(87)90124-0|Bolon DN, 2001, P NATL ACAD SCI USA, V98, P14274, DOI 10.1073/pnas.251555398|ARGOS P, 1977, BIOCHEM BIOPH RES CO, V75, P83, DOI 10.1016/0006-291X(77)91292-X|BOYER RF, 1991, J CHEM EDUC, V68, P430|BUNDI A, 1975, J MAGN RESON, V18,…	28	1	1	4	12	AMER CHEMICAL SOC	WASHINGTON	1155 16TH ST, NW, WASHINGTON, DC 20036 USA	0021-9584	1938-1328	J CHEM EDUC	J. Chem. Educ.	MAR	2014	91	451	454	10.1021/ed400368c	4	Chemistry, Multidisciplinary; Education, Scientific Disciplines	Chemistry; Education & Educational Research	AD5UU	WOS:000333319500027				3
	J	Wylie, SA|Jalbert, K|Dosemagen, S|Ratto, M	Wylie, Sara Ann|Jalbert, Kirk|Dosemagen, Shannon|Ratto, Matt	Institutions for Civic Technoscience: How Critical Making is Transforming Environmental Research	INFORMATION SOCIETY	English	Article	civic science; environmental justice; critical making; technoscience; social movements; Public Lab	SCIENCE; EARTH; CHALLENGES	This article explores the changing relationship between the academy and new public formations of scientific research, which we term "civic technoscience." Civic technoscience leverages tactics seen in critical making communities to question and transform how and who can make credible and actionable knowledge. A comparison of two case studies is used. The first is a grassroots mapping process that…	[Wylie, Sara Ann] Northeastern Univ, Social Sci & Environm Hlth Res Inst, Boston, MA 02115 USA.|[Jalbert, Kirk] Rensselaer Polytech Inst, Dept Sci & Technol Studies, Troy, NY 12181 USA.|[Dosemagen, Shannon] Publ Lab Open Technol & Sci, New Orleans, LA USA.|[Ratto, Matt] Univ Toronto, Fac Informat, Crit Making Lab, Toronto, ON, Canada.	Wylie, SA (reprint author), Northeastern Univ, Social Sci & Environm Hlth Res Inst, 360 Huntington Ave, Boston, MA 02115 USA.	s.wylie@neu.edu	Adams C., 2012, GOOGLE BLOG 0417|Allen Barbara, 2004, SCI CULTURE, V13, P429, DOI 10.1080/0950543042000311805|Allen BL, 2003, URBAN IND ENVIRON, P1|WINNER L, 1980, DAEDALUS, V109, P121|Bhabha H., 1994, LOCATION CULTURE|Bholer M., 2008, DIGITAL MEDIA DEMOCR|Brody H., 1981, MAPS DREAMS|Brown P, 2006, SCI TECHNOL HUM VAL, V31, P499, DOI 10.1177/0162243906289610|Brown P., 1997, NO SAFE PLACE TOXIC|Br…	79	3	3	3	14	TAYLOR & FRANCIS INC	PHILADELPHIA	530 CHESTNUT STREET, STE 850, PHILADELPHIA, PA 19106 USA	0197-2243	1087-6537	INFORM SOC	Inf. Soc.	2015-03-01	2014	30	116	126	10.1080/01972243.2014.875783	11	Information Science & Library Science	Information Science & Library Science	AC0QC	WOS:000332198800004				2
	J	Melvin, T|Masters, K|Lintott, C|Nichol, RC|Simmons, B|Bamford, SP|Casteels, KRV|Cheung, E|Edmondson, EM|Fortson, L|Schawinski, K|Skibba, RA|Smith, AM|Willett, KW	Melvin, Thomas|Masters, Karen|Lintott, Chris|Nichol, Robert C.|Simmons, Brooke|Bamford, Steven P.|Casteels, Kevin R. V.|Cheung, Edmond|Edmondson, Edward M.|Fortson, Lucy|Schawinski, Kevin|Skibba, Ramin A.|Smith, Arfon M.|Willett, Kyle W.	Galaxy Zoo: an independent look at the evolution of the bar fraction over the last eight billion years from HST-COSMOS	MONTHLY NOTICES OF THE ROYAL ASTRONOMICAL SOCIETY	English	Article	galaxies: evolution; galaxies: spiral; galaxies: structure	DIGITAL-SKY-SURVEY; DARK-MATTER HALOS; SPACE-TELESCOPE OBSERVATIONS; EXTRAGALACTIC LEGACY SURVEY; CENTRAL MASS CONCENTRATIONS; STAR-FORMATION HISTORY; ARECIBO SDSS SURVEY; ULTRA-DEEP-FIELD; DISK GALAXIES; SECULAR EVOLUTION	We measure the redshift evolution of the bar fraction in a sample of 2380 visually selected disc galaxies found in Cosmic Evolution Survey (COSMOS) Hubble Space Telescope (HST) images. The visual classifications used both to identify the disc sample and to indicate the presence of stellar bars were provided by citizen scientists via the Galaxy Zoo: Hubble (GZH) project. We find that the overall b…	[Melvin, Thomas; Masters, Karen; Nichol, Robert C.; Edmondson, Edward M.] Univ Portsmouth, Inst Cosmol & Gravitat, Portsmouth PO1 3FX, Hants, England.|[Lintott, Chris; Simmons, Brooke] Univ Oxford, Dept Phys, Oxford Astrophys, Oxford OX1 3RH, England.|[Bamford, Steven P.] Univ Nottingham, Sch Phys & Astron, Nottingham NG7 2RD, England.|[Casteels, Kevin R. V.] Univ Barcelona UB IEEC, Inst Cincies …	Melvin, T (reprint author), Univ Portsmouth, Inst Cosmol & Gravitat, Dennis Sciama Bldg,Burnaby Rd, Portsmouth PO1 3FX, Hants, England.	tom.melvin@port.ac.uk	Abraham R. G., 1999, IAU S, V186, P11|Abraham RG, 1999, MON NOT R ASTRON SOC, V308, P569, DOI 10.1046/j.1365-8711.1999.02766.x|Aguerri JAL, 2009, ASTRON ASTROPHYS, V495, P491, DOI 10.1051/0004-6361:200810931|Alonso MS, 2013, ASTRON ASTROPHYS, V549, DOI 10.1051/0004-6361/201220117|COMBES F, 1981, ASTRON ASTROPHYS, V96, P164|Catinella B, 2010, MON NOT R ASTRON SOC, V403, P683, DOI 10.1111/j.1365-29…	119	15	15	0	6	OXFORD UNIV PRESS	OXFORD	GREAT CLARENDON ST, OXFORD OX2 6DP, ENGLAND	0035-8711	1365-2966	MON NOT R ASTRON SOC	Mon. Not. Roy. Astron. Soc.	MAR	2014	438	2882	2897	10.1093/mnras/stt2397	16	Astronomy & Astrophysics	Astronomy & Astrophysics	AB8KD	WOS:000332038000013		Leverhulme Trust; Science and Technology Facilities Council [ST/J500665/1, ST/K00090X/1]; Leverhulme Trust as a ECF; Swiss National Science Foundation [PP00P2_138979/1]; NSF [AST-1055081]; STFC; US National Science Foundation [DRL-0941610]; Alfred P. Sloan Foundation; National Science Foundation; U.S. Department of Energy; National Aeronautics and Space Administration; Japanese Monbukagakusho; Ma…	This work has been made possible by the participation of more than 86 000 volunteers of the Galaxy Zoo: Hubble project. Their contributions are individually acknowledged at http://authors.galaxyzoo.org/. The development of the project was supported by The Leverhulme Trust.We thank the referee for many helpful comments and suggestions that improved the paper. TM acknowledges funding from the Scien…	4			Bamford, Steven/0000-0001-7821-7195
	J	Boucher-Lalonde, V|Theriault, FL|Currie, DJ	Boucher-Lalonde, Veronique|Theriault, Francois L.|Currie, David J.	Can climate explain interannual local extinctions among bird species?	JOURNAL OF BIOGEOGRAPHY	English	Article	Abundant-centre hypothesis; bird species richness; Breeding Bird Survey; climate-dependent extinction; extirpation; geographical range; local extinction; North America; optimum temperature	DYNAMICS; DIVERSITY; RANGE; SCALE; GRADIENTS; ABUNDANCE; RICHNESS; ENVIRONMENTS; BIODIVERSITY; MACROECOLOGY	AimGeographical variations in species richness are strongly related to temperature and precipitation. On ecological time-scales, these variations in species richness should reflect rates of immigration and local extinction (extirpation). Here we ask whether the probability of local extinction in passerine birds covaries with climate. Specifically, we test whether local extinctions increase with c…	[Boucher-Lalonde, Veronique; Currie, David J.] Univ Ottawa, Dept Biol, Ottawa, ON K1N 6N5, Canada.|[Theriault, Francois L.] McGill Univ, Dept Epidemiol Biostat & Occupat Hlth, Montreal, PQ H3A 1A2, Canada.	Boucher-Lalonde, V (reprint author), Univ Ottawa, Dept Biol, 30 Marie Curie Private, Ottawa, ON K1N 6N5, Canada.	vbouc050@uottawa.ca	Willig MR, 2003, ANNU REV ECOL EVOL S, V34, P273, DOI 10.1146/annurev.ecolsys.34.012103.144032|Ferraz G, 2007, SCIENCE, V315, P238, DOI 10.1126/science.1133097|Hanski I, 1998, NATURE, V396, P41, DOI 10.1038/23876|Yackulic CB, 2011, P NATL ACAD SCI USA, V108, P4024, DOI 10.1073/pnas.1015097108|Hijmans RJ, 2005, INT J CLIMATOL, V25, P1965, DOI 10.1002/joc.1276|Vetaas OR, 2002, J BIOGEOGR, V29, P545…	55	1	1	8	35	WILEY-BLACKWELL	HOBOKEN	111 RIVER ST, HOBOKEN 07030-5774, NJ USA	0305-0270	1365-2699	J BIOGEOGR	J. Biogeogr.	MAR	2014	41	443	451	10.1111/jbi.12232	9	Ecology; Geography, Physical	Environmental Sciences & Ecology; Physical Geography	AA2EL	WOS:000330907800003		Natural Science and Engineering Research Council of Canada	This work was funded by a graduate scholarship to V.B.L., a summer research fellowship to F.L.T. and a discovery grant to D.J.C. from the Natural Science and Engineering Research Council of Canada. We thank the US Geological Survey and thousands of volunteers for collecting these data, Compute Canada and High Performance Computing Virtual Laboratory for providing computing facilities, as well as …	3
	J	Feldman, RE|McGill, BJ	Feldman, Richard E.|McGill, Brian J.	How important is nectar in shaping spatial variation in the abundance of temperate breeding hummingbirds?	JOURNAL OF BIOGEOGRAPHY	English	Article	Abundance; Archilochus alexandri; enhanced vegetation index; hummingbird; large spatial scale; nectar; occupancy; Selasphorus platycercus; Southwest USA; spatial variation	IDEAL FREE DISTRIBUTION; RESOURCE ABUNDANCE; TEMPORAL VARIATION; ECHIUM-VULGARE; COMPETITION; BIRD; FOREST; ENERGY; TERRITORIALITY; POPULATION	AimOur aim was to test the degree to which nectar production predicts hummingbird abundances at large spatial scales compared with other large-scale environmental variables. LocationArizona, Colorado, New Mexico and Utah, USA. MethodsWe surveyed nectar producing flowers at 67 sites in the summer of 2008 and converted flower densities to nectar production using data obtained from the literature. W…	[Feldman, Richard E.] McGill Univ, Dept Biol, Montreal, PQ H3A 1B1, Canada.|[McGill, Brian J.] Univ Maine, Sch Biol, Orono, ME 04469 USA.|[McGill, Brian J.] Univ Maine, Ecol & Sustainable Solut Initiat, Orono, ME 04469 USA.	Feldman, RE (reprint author), Univ Massachusetts, Dept Environm Conservat, 201 Holdsworth Hall,160 Holdsworth Way, Amherst, MA 01003 USA.	richardf@eco.umass.edu	Abrahamczyk S, 2010, J ORNITHOL, V151, P615, DOI 10.1007/s10336-010-0496-x|Elith J, 2010, METHODS ECOL EVOL, V1, P330, DOI 10.1111/j.2041-210X.2010.00036.x|Gill JA, 2001, NATURE, V412, P436, DOI 10.1038/35086568|Hijmans RJ, 2005, INT J CLIMATOL, V25, P1965, DOI 10.1002/joc.1276|BROWN JL, 1969, AM NAT, V103, P347, DOI 10.1086/282607|BROWN JH, 1979, ECOLOGY, V60, P1022, DOI 10.2307/1936870|Guisan A…	64	1	1	11	33	WILEY-BLACKWELL	HOBOKEN	111 RIVER ST, HOBOKEN 07030-5774, NJ USA	0305-0270	1365-2699	J BIOGEOGR	J. Biogeogr.	MAR	2014	41	489	500	10.1111/jbi.12226	12	Ecology; Geography, Physical	Environmental Sciences & Ecology; Physical Geography	AA2EL	WOS:000330907800007		NSERC PGS-D scholarship	We thank Amanda Barth for field assistance; Doug Armstrong, Maria Clara Castellanos and Peter Scott for providing nectar data; and Don Powers, Peter Scott, Elizabeth Vise, Nick Waser and Susan Wethington for help with project planning and implementation. We appreciate the effort of all the BBS volunteers without whom studies like this would not be possible. R.E.F. was supported by a NSERC PGS-D s…	3
	J	Solano, E|Rodrigo, C|Pulido, R|Carry, B	Solano, E.|Rodrigo, C.|Pulido, R.|Carry, B.	Precovery of near-Earth asteroids by a citizen-science project of the Spanish Virtual Observatory	ASTRONOMISCHE NACHRICHTEN	English	Article	astronomical databases: miscellaneous; minor planets, asteroids	DIGITAL SKY SURVEY; PLANET HUNTERS; SYSTEM; MAGNITUDES; HAZARD	This article describes a citizen-science project conducted by the Spanish Virtual Observatory (SVO) to improve the orbits of near-Earth asteroids (NEAs) using data from astronomical archives. The list of NEAs maintained at the Minor Planet Center (MPC) is checked daily to identify new objects or changes in the orbital parameters of already catalogued objects. Using NEODyS we compute the position …	[Solano, E.; Rodrigo, C.; Pulido, R.] Ctr Astrobiol INTA CSIC, Dept Astrofis, E-28691 Madrid, Spain.|[Carry, B.] CNRS, UPMC, Observ Paris, IMCCE, F-75014 Paris, France.	Solano, E (reprint author), Ctr Astrobiol INTA CSIC, Dept Astrofis, Campus Villafranca,POB 78, E-28691 Madrid, Spain.	esm@cab.inta-csic.es	Cardamone C, 2009, MON NOT R ASTRON SOC, V399, P1191, DOI 10.1111/j.1365-2966.2009.15383.x|Fukugita M, 1996, ASTRON J, V111, P1748, DOI 10.1086/117915|Bottke WF, 2006, ANNU REV EARTH PL SC, V34, P157, DOI 10.1146/annurev.earth.34.031405.125154|York DG, 2000, ASTRON J, V120, P1579, DOI 10.1086/301513|Lawrence A, 2007, MON NOT R ASTRON SOC, V379, P1599, DOI 10.1111/j.1365-2966.2007.12040.x|Ivezic Z…	22	2	2	2	6	WILEY-V C H VERLAG GMBH	WEINHEIM	BOSCHSTRASSE 12, D-69469 WEINHEIM, GERMANY	0004-6337	1521-3994	ASTRON NACHR	Astro. Nachr.	FEB	2014	335	142	149	10.1002/asna.201311888	8	Astronomy & Astrophysics	Astronomy & Astrophysics	AI1DM	WOS:000336590200004		Spanish MICINN [AyA2008-02156, AyA2011-24052]; Alfred P. Sloan Foundation; National Science Foundation; U.S. Department of Energy Office of Science; University of Arizona; Brazilian Participation Group; Brookhaven National Laboratory; University of Cambridge; Carnegie Mellon University; University of Florida; French Participation Group; German Participation Group; Harvard University; Instituto de…	The SVO-NEA system has been developed under the Spanish Virtual Observatory project (Centro de Astrobiologia, INTA-CSIC) supported from the Spanish MICINN through grants AyA2008-02156 and AyA2011-24052. This research has made use of Aladin and NEODyS.Funding for SDSS-III has been provided by the Alfred P. Sloan Foundation, the Participating Institutions, the National Science Foundation, and the U…	2
	J	Shamir, L|Yerby, C|Simpson, R|von Benda-Beckmann, AM|Tyack, P|Samarra, F|Miller, P|Wallin, J	Shamir, Lior|Yerby, Carol|Simpson, Robert|von Benda-Beckmann, Alexander M.|Tyack, Peter|Samarra, Filipa|Miller, Patrick|Wallin, John	Classification of large acoustic datasets using machine learning and crowdsourcing: Application to whale calls	JOURNAL OF THE ACOUSTICAL SOCIETY OF AMERICA	English	Article		RESIDENT KILLER WHALES; FINNED PILOT WHALES; ORCINUS-ORCA; BRITISH-COLUMBIA; IMAGE-ANALYSIS; DATA RELEASE; GALAXY ZOO; SOUND; WHISTLES; SONAR	Vocal communication is a primary communication method of killer and pilot whales, and is used for transmitting a broad range of messages and information for short and long distance. The large variation in call types of these species makes it challenging to categorize them. In this study, sounds recorded by audio sensors carried by ten killer whales and eight pilot whales close to the coasts of No…	[Shamir, Lior; Yerby, Carol] Lawrence Technol Univ, Southfield, MI 48075 USA.|[Simpson, Robert] Univ Oxford, Oxford OX1 3RH, England.|[von Benda-Beckmann, Alexander M.] Netherlands Org Appl Sci Res, NL-2509 JG The Hague, Zuid Holland, Netherlands.|[Tyack, Peter; Samarra, Filipa; Miller, Patrick] Univ St Andrews, St Andrews KY16 9ST, Fife, Scotland.|[Wallin, John] Middle Tennessee State Univ, Murf…	Shamir, L (reprint author), Lawrence Technol Univ, 21000 Ten Mile Rd, Southfield, MI 48075 USA.	lshamir@mtu.edu	Lintott CJ, 2008, MON NOT R ASTRON SOC, V389, P1179, DOI 10.1111/j.1365-2966.2008.13689.x|Lintott C, 2011, MON NOT R ASTRON SOC, V410, P166, DOI 10.1111/j.1365-2966.2010.17432.x|Shamir L, 2009, IEEE T BIO-MED ENG, V56, P407, DOI 10.1109/TBME.2008.2006025|Tzanetakis G, 2002, IEEE T SPEECH AUDI P, V10, P293, DOI 10.1109/TSA.2002.800560|Oswald JN, 2003, MAR MAMMAL SCI, V19, P20, DOI 10.1111/j.1748-7…	44	1	1	9	33	ACOUSTICAL SOC AMER AMER INST PHYSICS	MELVILLE	STE 1 NO 1, 2 HUNTINGTON QUADRANGLE, MELVILLE, NY 11747-4502 USA	0001-4966	1520-8524	J ACOUST SOC AM	J. Acoust. Soc. Am.	FEB	2014	135	953	962	10.1121/1.4861348	10	Acoustics; Audiology & Speech-Language Pathology	Acoustics; Audiology & Speech-Language Pathology	AB5RL	WOS:000331846000048		NSF [0941610, 1157162]; Scientific American; Sea Mammal Research Unit at the University of St. Andrews; Woods Hole Oceanographic Institution for the Whale FM project; Marine Alliance for Science and Technology for Scotland (MASTS); Scottish Funding Council [HR09011]	Zooniverse is supported by NSF Grant No. 0941610. We gratefully acknowledge help from data collectors: Ari Shapiro, Laela Sayigh, Ricardo Antunes, and Ana Catarina Alves. Acoustic data were collected as part of the BRS and 3S behavioral response studies. We thank all Whale FM volunteers who helped matching data (a full list of contributing volunteers can be found at http://whale.fm/contributors).…	2		25234903
	J	Cook, LM	Cook, Laurence M.	MORPH FREQUENCY IN BRITISH CEPAEA NEMORALIS: WHAT HAS CHANGED IN HALF A CENTURY?	JOURNAL OF MOLLUSCAN STUDIES	English	Article		EVOLUTION MEGALAB; L.; POPULATIONS; POLYMORPHISM; HABITAT	The Evolution Megalab database of Cepaea nemoralis provides shell morph frequencies in sets of samples collected from throughout the geographical range during the mid-20th and early 21st centuries. Using data from Britain only, historic and recent samples from woodland, hedgerow and grassland habitats, compared over different geographical distances apart, have been examined for change in frequenc…	Univ Manchester, Fac Life Sci, Manchester M13 9PT, Lancs, England.	Cook, LM (reprint author), Univ Manchester, Fac Life Sci, Manchester M13 9PT, Lancs, England.	lcook@manchester.ac.uk	Bellido A, 2002, HEREDITY, V88, P75, DOI 10.1038/sj/hdy/6800012|Brown SJ, 2008, J GEOPHYS RES-ATMOS, V113, DOI 10.1029/2006JD008091|Cameron RAD, 2013, BIOL J LINN SOC, V108, P473, DOI 10.1111/j.1095-8312.2012.02033.x|Cameron RAD, 2013, BIOL J LINN SOC, V108, P315, DOI 10.1111/j.1095-8312.2012.02008.x|Cameron RAD, 2012, J MOLLUS STUD, V78, P179, DOI 10.1093/mollus/eyr052|Cameron Robert A.D., 2012,…	12	0	1	9	22	OXFORD UNIV PRESS	OXFORD	GREAT CLARENDON ST, OXFORD OX2 6DP, ENGLAND	0260-1230	1464-3766	J MOLLUS STUD	J. Molluscan Stud.	FEB	2014	80	43	46	10.1093/mollus/eyt040	4	Marine & Freshwater Biology; Zoology	Marine & Freshwater Biology; Zoology	AA1EK	WOS:000330839000006
	J	Hou, LG|Gao, XY	Hou, L. G.|Gao, X. Y.	A statistical study of gaseous environment of Spitzer interstellar bubbles	MONTHLY NOTICES OF THE ROYAL ASTRONOMICAL SOCIETY	English	Article	stars: formation; ISM: bubbles; ISM: clouds; H II regions	H-II-REGIONS; TRIGGERED STAR-FORMATION; ULTRACOMPACT HII-REGIONS; GALACTIC RING SURVEY; RECOMBINATION LINE EMISSION; MILKY-WAY PROJECT; MOLECULAR CLOUDS; SPIRAL STRUCTURE; INNER GALAXY; CO SURVEY	The expansion of interstellar bubbles is suggested to be an important mechanism of triggering material accumulation and star formation. In this work, we investigate the gaseous environment of a large sample of interstellar bubbles identified by the Spitzer space telescope, aiming to explore the possible evidence of triggered gas accumulation and star formation in a statistical sense. By cross-mat…	[Hou, L. G.; Gao, X. Y.] Chinese Acad Sci, Natl Astron Observ, Beijing 100012, Peoples R China.	Hou, LG (reprint author), Chinese Acad Sci, Natl Astron Observ, 20A Datun Rd, Beijing 100012, Peoples R China.	lghou@nao.cas.cn	Anderson LD, 2011, ASTROPHYS J SUPPL S, V194, DOI 10.1088/0067-0049/194/2/32|Anderson LD, 2012, ASTROPHYS J, V754, DOI 10.1088/0004-637X/754/1/62|Anderson LD, 2009, ASTROPHYS J, V690, P706, DOI 10.1088/0004-637X/690/1/706|Roman-Duval J, 2009, ASTROPHYS J, V699, P1153, DOI 10.1088/0004-637X/699/2/1153|Dale JE, 2012, MON NOT R ASTRON SOC, V427, P2852, DOI 10.1111/j.1365-2966.2012.22104.x|LANDY SD, …	104	0	0	6	11	OXFORD UNIV PRESS	OXFORD	GREAT CLARENDON ST, OXFORD OX2 6DP, ENGLAND	0035-8711	1365-2966	MON NOT R ASTRON SOC	Mon. Not. Roy. Astron. Soc.	FEB	2014	438	426	437	10.1093/mnras/stt2212	12	Astronomy & Astrophysics	Astronomy & Astrophysics	300IH	WOS:000330457100050		National Natural Science Foundation (NNSF) of China [11303035]; Youth Foundation of Hebei Province [A2011205067]; National Astronomical Observatories, Chinese Academy of Sciences; National Science Foundation [AST-9800334, AST-0098562, AST-0100793, AST-0228993, AST-0507657]	We thank the referee, Dr. Nicolas Flagey, for constructive comments. LGH would like to thank Dr. Lepine and Dr. Bronfman for kindly providing us their data. The authors are supported by the National Natural Science Foundation (NNSF) of China (11303035), the Youth Foundation of Hebei Province (A2011205067) and the Young Researcher Grant of National Astronomical Observatories, Chinese Academy of Sc…	1
	J	Keel, WC|Manning, AM|Holwerda, BW|Lintott, CJ|Schawinski, K	Keel, William C.|Manning, Anna M.|Holwerda, Benne W.|Lintott, Chris J.|Schawinski, Kevin	THE ULTRAVIOLET ATTENUATION LAW IN BACKLIT SPIRAL GALAXIES	ASTRONOMICAL JOURNAL	English	Article	galaxies: ISM; galaxies: spiral; ultraviolet: galaxies	SPACE-TELESCOPE OBSERVATIONS; DUST EXTINCTION; STARBURST GALAXIES; SEEING GALAXIES; EVOLUTION; I.; NGC-2207; TREASURY; OPACITY; IC-2163	The effective extinction law (attenuation behavior) in galaxies in the emitted ultraviolet (UV) regime is well known only for actively star-forming objects and combines effects of the grain properties, fine structure in the dust distribution, and relative distributions of stars and dust. We use Galaxy Evolution Explorer, XMM Optical Monitor, and Hubble Space Telescope (HST) data to explore the UV…	[Keel, William C.] Univ Alabama, Dept Phys & Astron, Tuscaloosa, AL 35487 USA.|[Holwerda, Benne W.] ESA ESTEC, NL-2201 AZ Noordwijk, Netherlands.|[Holwerda, Benne W.] Leiden Observ, NL-2300 RA Leiden, Netherlands.|[Lintott, Chris J.] Univ Oxford, Oxford OX1 3RH, England.|[Lintott, Chris J.] Adler Planetarium, Chicago, IL 60605 USA.|[Schawinski, Kevin] ETH, Inst Astron, CH-8093 Zurich, Switzerland.	Keel, WC (reprint author), Univ Alabama, Dept Phys & Astron, Box 870324, Tuscaloosa, AL 35487 USA.	wkeel@ua.edu; ammanning@bama.ua.edu; bholwerd@rssd.esa.int; cjl@astro.ox.ac.uk; kevin.schawinski@phys.ethz	Lintott CJ, 2008, MON NOT R ASTRON SOC, V389, P1179, DOI 10.1111/j.1365-2966.2008.13689.x|CALZETTI D, 1994, ASTROPHYS J, V429, P582, DOI 10.1086/174346|Malkan MA, 1998, ASTROPHYS J SUPPL S, V117, P25, DOI 10.1086/313110|CARDELLI JA, 1989, ASTROPHYS J, V345, P245, DOI 10.1086/167900|Martin DC, 2005, ASTROPHYS J, V619, pL1, DOI 10.1086/426387|Berry M, 2012, ASTROPHYS J, V757, DOI 10.1088/0004-637X/…	37	5	5	0	3	IOP PUBLISHING LTD	BRISTOL	TEMPLE CIRCUS, TEMPLE WAY, BRISTOL BS1 6BE, ENGLAND	0004-6256	1538-3881	ASTRON J	Astron. J.	FEB	2014	147			10.1088/0004-6256/147/2/44	14	Astronomy & Astrophysics	Astronomy & Astrophysics	291OD	WOS:000329837100020		NASA Astrophysics Data Program (ADP) [NNX10AD54G]; Association of Universities for Research in Astronomy, Inc., under NASA [NAS5-26555]; NASA Office of Space Science [NNX09AF08G]; Leverhulme Trust and the STFC Science in Society Program; Henry Skynner Junior Research Fellowship at Balliol College, Oxford; NASA Einstein Fellowship at Yale; Swiss National Science Foundation [PP00P2 138979/1]; Jim G…	This project was enabled by many volunteer participants in the Galaxy Zoo project; their contributions to the backlit-galaxy program are acknowledged individually at http://data. galaxyzoo. org/overlaps. html. This work was supported by the NASA Astrophysics Data Program (ADP) under grant NNX10AD54G. Some of the data presented in this paper were obtained from the Mikulski Archive for Space Telesc…	2	44		Keel, William/0000-0002-6131-9539
	J	D'Amico, ME|Freppaz, M|Filippa, G|Zanini, E	D'Amico, Michele E.|Freppaz, Michele|Filippa, Gianluca|Zanini, Ermanno	Vegetation influence on soil formation rate in a proglacial chronosequence (Lys Glacier, NW Italian Alps)	CATENA	English	Article	Soil formation; Proglacial area; Soil chronosequence; Podzolization; Subalpine soils; Alpine soils	SWISS ALPS; PRIMARY SUCCESSION; MENDENHALL GLACIER; SOUTHEAST ALASKA; DAMMA GLACIER; FRENCH ALPS; MORAINES; ALPINE; PODZOL; SWITZERLAND	Climate change has huge impacts on alpine ecosystems. One of the most visible effects in the Alps is glacier retreat since the end of the Little Ice Age (LIA), which caused the exposure of previously glaciated surfaces. These surfaces are open-air laboratories, verifying theories regarding ecosystem and soil development. In order to increase our knowledge on the effects of time and vegetation pri…	[D'Amico, Michele E.] Univ Turin, DISAFA, Grugliasco, TO, Italy.|Univ Turin, NatRisk, Grugliasco, TO, Italy.	D'Amico, ME (reprint author), Univ Turin, DISAFA, Via Leonardo da Vinci 44, Grugliasco, TO, Italy.	ecomike77@gmail.com	Abakumov E, 2010, CHEM ECOL, V26, P59, DOI 10.1080/02757540.2010.497758|Alexander EB, 1996, GEODERMA, V72, P1, DOI 10.1016/0016-7061(96)00021-3|Anderson SP, 2000, GEOCHIM COSMOCHIM AC, V64, P1173, DOI 10.1016/S0016-7037(99)00358-0|Hothorn T, 2008, BIOMETRICAL J, V50, P346, DOI 10.1002/bimj.200810425|Bernasconi SM, 2011, VADOSE ZONE J, V10, P867, DOI 10.2136/vzj2010.0129|Bernier N, 2012, PEDOBIOLO…	59	4	4	3	49	ELSEVIER SCIENCE BV	AMSTERDAM	PO BOX 211, 1000 AE AMSTERDAM, NETHERLANDS	0341-8162	1872-6887	CATENA	Catena	FEB	2014	113	122	137	10.1016/j.catena.2013.10.001	16	Geosciences, Multidisciplinary; Soil Science; Water Resources	Geology; Agriculture; Water Resources	269JL	WOS:000328237500012
	J	Morrison, CA|Robinson, RA|Leech, DI|Dadam, D|Toms, MP	Morrison, Catriona A.|Robinson, Robert A.|Leech, Dave I.|Dadam, Daria|Toms, Mike P.	Using citizen science to investigate the role of productivity in House Sparrow Passer domesticus population trends	BIRD STUDY	English	Article		MAYFIELD METHOD; NEST SUCCESS; BIRD POPULATIONS; GREAT-BRITAIN; CONSERVATION; FARMLAND; HABITAT; DECLINE; WINTER; FOOD	Capsule Seasonal variation in garden House Sparrow numbers provides a tool to examine overall annual productivity, measuring the combined success of multiple breeding attempts and post-fledging survival.Aims To develop a metric to use British Trust for Ornithology (BTO) Garden BirdWatch (GBW) data to measure annual productivity in House Sparrows across regions and habitats exhibiting contrasting …	[Morrison, Catriona A.; Robinson, Robert A.; Leech, Dave I.; Dadam, Daria; Toms, Mike P.] British Trust Ornithol, Thetford IP24 2PU, Norfolk, England.	Morrison, CA (reprint author), British Trust Ornithol, Thetford IP24 2PU, Norfolk, England.	catriona.morrison@bto.org	Aebischer NJ, 1999, BIRD STUDY, V46, P22|Robb GN, 2008, BIOL LETTERS, V4, P220, DOI 10.1098/rsbl.2007.0622|Gregory RD, 2005, PHILOS T R SOC B, V360, P269, DOI 10.1098/rstb.2004.1602|Robb GN, 2008, FRONT ECOL ENVIRON, V6, P476, DOI 10.1890/060152|Evans KL, 2005, FUNCT ECOL, V19, P616, DOI 10.1111/j.1365-2435.2005.01016.x|Baillie SR, 2001, ARDEA, V89, P167|Bradbury RB, 2000, J APPL ECOL, V37, P789,…	42	0	0	15	55	TAYLOR & FRANCIS LTD	ABINGDON	4 PARK SQUARE, MILTON PARK, ABINGDON OX14 4RN, OXON, ENGLAND	0006-3657	1944-6705	BIRD STUDY	Bird Stud.	2015-01-02	2014	61	91	100	10.1080/00063657.2013.874975	10	Ornithology	Zoology	302PO	WOS:000330617600010		BTO; JNCC; RSPB	The NRS is undertaken through a partnership between the BTO and the JNCC (on behalf of Natural England, Scottish Natural Heritage, the Countryside Council for Wales and the Council for Nature Conservation and the Countryside in Northern Ireland) and the BBS is jointly funded by the BTO, JNCC and RSPB. The BTO GBW is funded by its participants, for whose support we are extremely grateful.	1			Robinson, Robert/0000-0003-0504-9906	Robinson, Robert/B-8237-2009
	S	Cabrera, GF|Miller, CJ|Schneider, J	Cabrera, Guillermo F.|Miller, Christopher J.|Schneider, Jeff	Systematic Labeling Bias: De-biasing where Everyone is Wrong	2014 22ND INTERNATIONAL CONFERENCE ON PATTERN RECOGNITION (ICPR)	English	Proceedings Paper		DIGITAL SKY SURVEY; GALAXY ZOO; ENVIRONMENT; CLASSIFIER; CATALOG	Many real world classification problems use ground truth labels created by human annotators. However, observed data is never perfect, and even labels assigned by perfect annotators can be systematically biased due to poor quality of the data they are labeling. This bias is not created by the annotators from measurement error, but is intrinsic to the observational data. We present a method for de-…	[Cabrera, Guillermo F.] Univ Chile, Dept Comp Sci, Santiago, Chile.|[Cabrera, Guillermo F.] Univ Chile, Ctr Math Modeling, Santiago, Chile.|[Cabrera, Guillermo F.] AURA Observ Chile, La Serena, Chile.|[Miller, Christopher J.] Univ Michigan, Dept Astron, Ann Arbor, MI 48109 USA.|[Schneider, Jeff] Carnegie Mellon Univ, Sch Comp Sci, Pittsburgh, PA 15213 USA.	Cabrera, GF (reprint author), Univ Chile, Dept Comp Sci, Santiago, Chile.	gcabrera@dim.uchile.cl; christoq@umich.edu; jeff.schneider@cs.cmu.edu	Lintott C, 2011, MON NOT R ASTRON SOC, V410, P166, DOI 10.1111/j.1365-2966.2010.17432.x|Brodley CE, 1999, J ARTIF INTELL RES, V11, P131|Raykar VC, 2010, J MACH LEARN RES, V11, P1297|Hunter JD, 2007, COMPUT SCI ENG, V9, P90, DOI 10.1109/MCSE.2007.55|Pedregosa F, 2011, J MACH LEARN RES, V12, P2825|MILLSAP RE, 1993, APPL PSYCH MEAS, V17, P297, DOI 10.1177/014662169301700401|Bamford SP, 2009, MON NOT…	22	0	0	0	0	IEEE COMPUTER SOC	LOS ALAMITOS	10662 LOS VAQUEROS CIRCLE, PO BOX 3014, LOS ALAMITOS, CA 90720-1264 USA	1051-4651		INT C PATT RECOG			2014		4417	4422	10.1109/ICPR.2014.756	6	Computer Science, Artificial Intelligence; Computer Science, Theory & Methods; Engineering, Electrical & Electronic	Computer Science; Engineering	BD3KX	WOS:000359818004093											International Conference on Pattern Recognition	978-1-4799-5208-3
	S	Devlin, S|Cowling, PI|Kudenko, D|Goumagias, N|Nucciareli, A|Cabras, I|Fernandes, KJ|Li, F	Devlin, Sam|Cowling, Peter I.|Kudenko, Daniel|Goumagias, Nikolaos|Nucciareli, Alberto|Cabras, Ignazio|Fernandes, Kiran Jude|Li, Feng	Game Intelligence	2014 IEEE CONFERENCE ON COMPUTATIONAL INTELLIGENCE AND GAMES (CIG)	English	Proceedings Paper		WORLDS	Game Intelligence is knowledge gained by the player or by analysing the data players generate by playing digital games. Serious games for education, raising public awarenesss or changing the players' behaviour are well established and have provided Game Intelligence for decades [1]. However, more recently a trend has begun, inspired by the success of FoldIt [2], [3], of developing games for scien…	[Devlin, Sam; Cowling, Peter I.; Kudenko, Daniel] Univ York, York YO10 5DD, N Yorkshire, England.|[Goumagias, Nikolaos; Cabras, Ignazio] Northumbria Univ, Newcastle Business Sch, Newcastle Upon Tyne NE1 8ST, Tyne & Wear, England.|[Nucciareli, Alberto; Li, Feng] City Univ London, Cass Business Sch, London, England.|[Fernandes, Kiran Jude] Univ Durham, Sch Business, Durham DH1 3HP, England.	Devlin, S (reprint author), Univ York, York YO10 5DD, N Yorkshire, England.	Sam.Devlin@york.ac.uk	Abt CC, 1987, SERIOUS GAMES|Balicer RD, 2007, EPIDEMIOLOGY, V18, P260, DOI 10.1097/01.ede.0000254692.80550.60|Yannakakis GN, 2011, IEEE T AFFECT COMPUT, V2, P147, DOI 10.1109/T-AFFC.2011.6|[Anonymous], 2012, VALVE EC|[Anonymous], 2007, EVE ONLINE Q EC NEWS|Association E. S., 2014, ESS FACTS COMP VID G|ATKINSON BMC, 2006, PERSUASIVE TECHNOLOG, V3962, P171, DOI 10.1007/11755494_25|Bainbridge WS, 20…	59	0	0	0	0	IEEE	NEW YORK	345 E 47TH ST, NEW YORK, NY 10017 USA	2325-4270		IEEE CONF COMPU INTE			2014					8	Computer Science, Artificial Intelligence; Computer Science, Theory & Methods; Engineering, Electrical & Electronic	Computer Science; Engineering	BC7XD	WOS:000355274600058											IEEE Conference on Computational Intelligence and Games	978-1-4799-3547-5
	S	Pompea, SM|Fine, LW|Sparks, RT|Walker, CE|Dugan, CL|Dokter, EFC	Pompea, Stephen M.|Fine, Leonard W.|Sparks, Robert T.|Walker, Constance E.|Dugan, Charles L.|Dokter, Erin F. C.	The Galileoscope Project: Community-Based Technology Education in Arizona	12TH EDUCATION AND TRAINING IN OPTICS AND PHOTONICS CONFERENCE	English	Proceedings Paper	optics education; educational systems; educational reform; technology education; public engagement		A program model has been developed and implemented over the last three years to provide a robust optical technology-based science education program to students aged 9-11 years (5th grade), a formative time in the development of a student's interest in science and engineering. We have created well-tested and evaluated teaching kits for the classroom to teach about the basics of image formation and…	[Pompea, Stephen M.; Sparks, Robert T.; Walker, Constance E.; Dugan, Charles L.] Natl Opt Astron Observ, Tucson, AZ 85719 USA.|[Fine, Leonard W.] Sci Fdn Arizona, Phoenix, AZ 85004 USA.|[Dokter, Erin F. C.] Univ Arizona, Off Instruct & Assessment, Tucson, AZ 85721 USA.	Pompea, SM (reprint author), Natl Opt Astron Observ, 950 N Cherry Ave, Tucson, AZ 85719 USA.		[Anonymous], 2008, AER DEF COMM ANN REP|Dokter E. F. C., 2010, P SPIE OPTICS ED OUT, V7783|Lazarowitz R., 1994, HDB RES SCI TEACHING|Pompea S. M., 2008, EXEMPLARY SCI INFORM, P47|Pompea S. M., 2008, ASTRONOMICAL SOC PAC, V389|Pompea S. M., 2010, P SPIE MODELING SYST, VIV|Pompea S. M., 2010, ASP C SERIES, V431|Pompea S. M., 2011, P SPIE EC 2011 SUST|Pompea S. M., 2007, P ED TRAIN OPT PHOT|Pompea S…	12	0	0	1	1	SPIE-INT SOC OPTICAL ENGINEERING	BELLINGHAM	1000 20TH ST, PO BOX 10, BELLINGHAM, WA 98227-0010 USA	0277-786X		PROC SPIE			2014	9289			10.1117/12.2070734	8	Optics	Optics	BC1PD	WOS:000350340900086					92892F					Costa, MFPCM Zghal, M	Proceedings of SPIE	978-1-62841-364-9
	J	Sullivan, BL|Aycrigg, JL|Barry, JH|Bonney, RE|Bruns, N|Cooper, CB|Damoulas, T|Dhondt, AA|Dietterich, T|Farnsworth, A|Fink, D|Fitzpatrick, JW|Fredericks, T|Gerbracht, J|Gomes, C|Hochachka, WM|Iliff, MJ|Lagoze, C|La Sorte, FA|Merrifield, M|Morris, W|Phillips, TB|Reynolds, M|Rodewald, AD|Rosenberg, KV|Trautmann, NM|Wiggins, A|Winkler, DW|Wong, WK|Wood, CL|Yu, J|Kelling, S	Sullivan, Brian L.|Aycrigg, Jocelyn L.|Barry, Jessie H.|Bonney, Rick E.|Bruns, Nicholas|Cooper, Caren B.|Damoulas, Theo|Dhondt, Andre A.|Dietterich, Tom|Farnsworth, Andrew|Fink, Daniel|Fitzpatrick, John W.|Fredericks, Thomas|Gerbracht, Jeff|Gomes, Carla|Hochachka, Wesley M.|Iliff, Marshall J.|Lagoze, Carl|La Sorte, Frank A.|Merrifield, Matthew|Morris, Will|Phillips, Tina B.|Reynolds, Mark|Rodewal…	The eBird enterprise: An integrated approach to development and application of citizen science	BIOLOGICAL CONSERVATION	English	Review	eBird; Citizen-science	POPULATION DECLINES; SPECIES-OCCURRENCE; CLIMATE-CHANGE; BIRD; MODELS; CONSERVATION; INDICATORS; MIGRATION; NETWORK; ERROR	Citizen-science projects engage volunteers to gather or process data to address scientific questions. But citizen-science projects vary in their ability to contribute usefully for science, conservation, or public policy. eBird has evolved from a basic citizen-science project into a collective enterprise, taking a novel approach to citizen science by developing cooperative partnerships among exper…	[Sullivan, Brian L.; Barry, Jessie H.; Bonney, Rick E.; Bruns, Nicholas; Cooper, Caren B.; Dhondt, Andre A.; Farnsworth, Andrew; Fink, Daniel; Fitzpatrick, John W.; Fredericks, Thomas; Gerbracht, Jeff; Hochachka, Wesley M.; Iliff, Marshall J.; La Sorte, Frank A.; Morris, Will; Phillips, Tina B.; Rodewald, Amanda D.; Rosenberg, Kenneth V.; Trautmann, Nancy M.; Wood, Christopher L.; Kelling, Steve]…	Sullivan, BL (reprint author), Cornell Lab Ornithol, 159 Sapsucker Woods Rd, Ithaca, NY 14850 USA.	bls42@cornell.edu	La Sorte FA, 2013, ECOLOGY, V94, P1839, DOI 10.1890/12-1768.1|Lawton JH, 1998, NATURE, V391, P72, DOI 10.1038/34166|Salewski V, 2007, NATURWISSENSCHAFTEN, V94, P268, DOI 10.1007/s00114-006-0186-y|Butchart SHM, 2010, SCIENCE, V328, P1164, DOI 10.1126/science.1187512|La Sorte FA, 2012, J ANIM ECOL, V81, P914, DOI 10.1111/j.1365-2656.2012.01958.x|Soberon J, 2009, AMBIO, V38, P29, DOI 10.1579/0044-74…	65	21	21	49	127	ELSEVIER SCI LTD	OXFORD	THE BOULEVARD, LANGFORD LANE, KIDLINGTON, OXFORD OX5 1GB, OXON, ENGLAND	0006-3207	1873-2917	BIOL CONSERV	Biol. Conserv.	JAN	2014	169	31	40	10.1016/j.biocon.2013.11.003	10	Biodiversity Conservation; Ecology; Environmental Sciences	Biodiversity & Conservation; Environmental Sciences & Ecology	AD9GX	WOS:000333574400005		National Science Foundation [NSF-ISE:0087760, NSF-ITR:46456, BIO-BDI:49605, CISE-SEI+II:50913, NSF-EHR:53811, BIO-RAPID:62570, NSF-CDI TYPE II:64083, NSF IIS:1017793, NSF IIS-1125098, DEB: 110008, DEB:100009, CISE-SOCS:66281]	We thank the thousands of eBird participants around the world who serve as the engine for the eBird enterprise, and the hundreds of regional editors who volunteer their time to review incoming data. We thank our international partners. We thank Tim Lenz, Kevin Webb, and Tim Levatich for their technical work on the project. Multiple facets of this work have been supported by the following National…				Aycrigg, Jocelyn/0000-0002-6511-7985	Dhondt, Andre/A-8292-2008;
	J	Garbrecht, JD|Zhang, JX	Garbrecht, Jurgen D.|Zhang, John X.	Generating Synthetic Daily Precipitation Realizations for Seasonal Precipitation Forecasts	JOURNAL OF HYDROLOGIC ENGINEERING	English	Article	Weather conditions; Forecasting; Precipitation; Seasonal variations; Models; Weather generation; Synthetic weather; Precipitation forecast; Daily precipitation model; Precipitation	DAILY WEATHER GENERATOR; CLIMATE-CHANGE; UNITED-STATES; LOW-FREQUENCY; MODELS; SIMULATION; REQUIREMENTS; TEMPERATURE; VARIABILITY; MANAGEMENT	Synthetic weather generation models that depend on statistics of past weather observations are often limited in their applications to issues that depend on historical weather characteristics. Enhancing these models to take advantage of increasingly available and skillful seasonal climate outlook products would broaden applications to include proactive soil and water resources management, better p…	[Garbrecht, Jurgen D.; Zhang, John X.] ARS, USDA, El Reno, OK 73036 USA.	Garbrecht, JD (reprint author), ARS, USDA, 7207 West Cheyenne St, El Reno, OK 73036 USA.	jurgen.garbrecht@ars.usda.gov; john.zhang@ars.usda.gov	RICHARDSON CW, 1981, WATER RESOUR RES, V17, P182, DOI 10.1029/WR017i001p00182|Wilks DS, 1999, PROG PHYS GEOG, V23, P329, DOI 10.1177/030913339902300302|Baigorria GA, 2008, J APPL METEOROL CLIM, V47, P76, DOI 10.1175/2007JAMC1523.1|Chen J, 2010, J HYDROL, V388, P480, DOI 10.1016/j.jhydrol.2010.05.032|Dubrovsky M, 2004, CLIMATIC CHANGE, V63, P145, DOI 10.1023/B:CLIM.0000018504.99914.60|Garbrecht J,…	33	2	2	1	5	ASCE-AMER SOC CIVIL ENGINEERS	RESTON	1801 ALEXANDER BELL DR, RESTON, VA 20191-4400 USA	1084-0699	1943-5584	J HYDROL ENG	J. Hydrol. Eng.	2015-01-01	2014	19	252	264	10.1061/(ASCE)HE.1943-5584.0000774	13	Engineering, Civil; Environmental Sciences; Water Resources	Engineering; Environmental Sciences & Ecology; Water Resources	AD7OL	WOS:000333453400026				1
	J	Crossett, JP|Pimbblet, KA|Stott, JP|Jones, DH	Crossett, Jacob P.|Pimbblet, Kevin A.|Stott, John P.|Jones, D. Heath	Environments and morphologies of red sequence galaxies with residual star formation in massive clusters	MONTHLY NOTICES OF THE ROYAL ASTRONOMICAL SOCIETY	English	Article	galaxies: clusters: general; galaxies: elliptical and lenticular, cD; galaxies: evolution; galaxies: stellar content; ultraviolet: galaxies	COLOR-MAGNITUDE RELATION; X-RAY-CLUSTERS; SPECTRAL-ENERGY-DISTRIBUTIONS; ELLIPTIC GALAXIES; RICH CLUSTER; SAURON PROJECT; S0 GALAXIES; STELLAR POPULATIONS; EVOLUTION-EXPLORER; MOLECULAR GAS	We present a photometric investigation into recent star formation in galaxy clusters at z similar to 0.1. We use spectral energy distribution templates to quantify recent star formation in large X-ray-selected clusters from the LARCS survey using matched GALEX near-ultraviolet (NUV) photometry. These clusters all have signs of red sequence galaxy recent star formation (as indicated by the blue NU…	[Crossett, Jacob P.; Pimbblet, Kevin A.; Jones, D. Heath] Monash Univ, Sch Phys, Clayton, Vic 3800, Australia.|[Crossett, Jacob P.; Pimbblet, Kevin A.; Jones, D. Heath] Monash Univ, Monash Ctr Astrophys MoCA, Clayton, Vic 3800, Australia.|[Pimbblet, Kevin A.] Univ Oxford, Dept Phys, Oxford OX1 3RH, England.|[Stott, John P.] Univ Durham, Dept Phys, Durham DH1 3LE, England.	Crossett, JP (reprint author), Monash Univ, Sch Phys, Clayton, Vic 3800, Australia.	jake.crossett@monash.edu	Morrissey P, 2007, ASTROPHYS J SUPPL S, V173, P682, DOI 10.1086/520512|Bruzual G, 2003, MON NOT R ASTRON SOC, V344, P1000, DOI 10.1046/j.1365-8711.2003.06897.x|Cappellari M, 2011, MON NOT R ASTRON SOC, V416, P1680, DOI 10.1111/j.1365-2966.2011.18600.x|Lintott C, 2011, MON NOT R ASTRON SOC, V410, P166, DOI 10.1111/j.1365-2966.2010.17432.x|GUNN JE, 1972, ASTROPHYS J, V176, P1, DOI 10.1086/151605|Yo…	66	3	3	0	1	OXFORD UNIV PRESS	OXFORD	GREAT CLARENDON ST, OXFORD OX2 6DP, ENGLAND	0035-8711	1365-2966	MON NOT R ASTRON SOC	Mon. Not. Roy. Astron. Soc.	JAN	2014	437	2521	2530	10.1093/mnras/stt2065	10	Astronomy & Astrophysics	Astronomy & Astrophysics	282GQ	WOS:000329158900037		Monash Dean's Scholarship; Alfred P. Sloan Foundation; National Science Foundation; US Department of Energy; National Aeronautics and Space Administration; Japanese Monbukagakusho; Max Planck Society; Higher Education Funding Council for England; American Museum of Natural History; Astrophysical Institute Potsdam; University of Basel; University of Cambridge; Case Western Reserve University; Univ…	We thank the anonymous referee for her/his feedback which has improved the work presented in this manuscript. JPC acknowledges financial support through the Monash Dean's Scholarship. KAP thanks Christ Church College, Oxford, for their hospitality whilst some of this work was being undertaken.Funding for the SDSS and SDSS-II has been provided by the Alfred P. Sloan Foundation, the Participating I…	3
	J	Cheung, E|Athanassoula, E|Masters, KL|Nichol, RC|Bosma, A|Bell, EF|Faber, SM|Koo, DC|Lintott, C|Melvin, T|Schawinski, K|Skibba, RA|Willett, KW	Cheung, Edmond|Athanassoula, E.|Masters, Karen L.|Nichol, Robert C.|Bosma, A.|Bell, Eric F.|Faber, S. M.|Koo, David C.|Lintott, Chris|Melvin, Thomas|Schawinski, Kevin|Skibba, Ramin A.|Willett, Kyle W.	GALAXY ZOO: OBSERVING SECULAR EVOLUTION THROUGH BARS	ASTROPHYSICAL JOURNAL	English	Article	galaxies: bulges; galaxies: evolution; galaxies: formation; galaxies: spiral; galaxies: statistics; galaxies: structure	DIGITAL-SKY-SURVEY; BARRED SPIRAL GALAXIES; STAR-FORMATION RATES; CENTRAL MASS CONCENTRATIONS; BAND OPTICAL-PROPERTIES; ACTIVE GALACTIC NUCLEI; IRAM LEGACY SURVEY; SIMILAR-TO 2; DISK GALAXIES; DARK-MATTER	In this paper, we use the Galaxy Zoo 2 data set to study the behavior of bars in disk galaxies as a function of specific star formation rate (SSFR) and bulge prominence. Our sample consists of 13,295 disk galaxies, with an overall (strong) bar fraction of 23.6% +/- 0.4%, of which 1154 barred galaxies also have bar length (BL) measurements. These samples are the largest ever used to study the role…	[Cheung, Edmond; Faber, S. M.; Koo, David C.] Univ Calif Santa Cruz, Dept Astron & Astrophys, Santa Cruz, CA 95064 USA.|[Athanassoula, E.; Bosma, A.] Aix Marseille Univ, CNRS, UMR 7326, LAM, F-13388 Marseille, France.|[Masters, Karen L.; Nichol, Robert C.; Melvin, Thomas] Univ Portsmouth, Inst Cosmol & Gravitat, Portsmouth PO1 3FX, Hants, England.|[Masters, Karen L.; Nichol, Robert C.] Univ South…	Cheung, E (reprint author), Univ Calif Santa Cruz, Dept Astron & Astrophys, 1156 High St, Santa Cruz, CA 95064 USA.	ec2250@gmail.com	Abazajian KN, 2009, ASTROPHYS J SUPPL S, V182, P543, DOI 10.1088/0067-0049/182/2/543|Abraham RG, 1999, MON NOT R ASTRON SOC, V308, P569, DOI 10.1046/j.1365-8711.1999.02766.x|Aguerri JAL, 2009, ASTRON ASTROPHYS, V495, P491, DOI 10.1051/0004-6361:200810931|Catinella B, 2010, MON NOT R ASTRON SOC, V403, P683, DOI 10.1111/j.1365-2966.2009.16180.x|Bell EF, 2001, ASTROPHYS J, V550, P212, DOI 10.1086/31…	154	21	23	0	9	IOP PUBLISHING LTD	BRISTOL	TEMPLE CIRCUS, TEMPLE WAY, BRISTOL BS1 6BE, ENGLAND	0004-637X	1538-4357	ASTROPHYS J	Astrophys. J.	2015-12-20	2013	779			10.1088/0004-637X/779/2/162	18	Astronomy & Astrophysics	Astronomy & Astrophysics	268RC	WOS:000328187200071		National Science Foundation [AST 08-08133]; European Union under REA [PITN-GA-2011-289313]; CNES (Centre National d'Etudes Spatiales, France); Leverhulme Trust; STFC [ST/I001204/1]; Swiss National Science Foundation [PP00P2_138979/1]; NSF [AST-1055081]; U.S. National Science Foundation [DRL-0941610]; GENCI-TGCC/CINES [2013-x2013047098]; Alfred P. Sloan Foundation; U.S. Department of Energy; NASA;…	E.C. acknowledges financial support from the National Science Foundation grant AST 08-08133. E. A. and A. B. acknowledge financial support to the DAGAL network from the People Programme (Marie Curie Actions) of the European Union's Seventh Framework Programme FP7/2007-2013/ under REA grant agreement number PITN-GA-2011-289313. They also acknowledge financial support from the CNES (Centre National…	2	162		Willett, Kyle/0000-0002-3654-3504
	J	Bled, F|Sauer, J|Pardieck, K|Doherty, P|Royle, JA	Bled, Florent|Sauer, John|Pardieck, Keith|Doherty, Paul|Royle, J. Andrew	Modeling Trends from North American Breeding Bird Survey Data: A Spatially Explicit Approach	PLOS ONE	English	Article		POPULATION-CHANGE; CERULEAN WARBLERS; FOREST BIRDS; STATISTICS; ABUNDANCE; SCALE; NEEDS	Population trends, defined as interval-specific proportional changes in population size, are often used to help identify species of conservation interest. Efficient modeling of such trends depends on the consideration of the correlation of population changes with key spatial and environmental covariates. This can provide insights into causal mechanisms and allow spatially explicit summaries at sc…	[Bled, Florent; Sauer, John; Pardieck, Keith; Royle, J. Andrew] US Geol Survey, Patuxent Wildlife Res Ctr, Laurel, MD USA.|[Bled, Florent; Doherty, Paul] Colorado State Univ, Dept Fish Wildlife & Conservat Biol, Ft Collins, CO 80523 USA.	Bled, F (reprint author), US Geol Survey, Patuxent Wildlife Res Ctr, Laurel, MD USA.	florent.bled@gmail.com	American Ornithologists' Union, 1998, CHECK LIST N AM BIRD, V7th|Andrle RF, 1988, ATLAS BREEDING BIRDS|Bahn V, 2006, ECOGRAPHY, V29, P835, DOI 10.1111/j.2006.0906-7590.04621.x|Lennon JJ, 2000, ECOGRAPHY, V23, P101, DOI 10.1034/j.1600-0587.2000.230111.x|Keitt TH, 2002, ECOGRAPHY, V25, P616, DOI 10.1034/j.1600-0587.2002.250509.x|Sturtz S, 2005, J STAT SOFTW, V12, P1|Askins Robert A., 1993, Current …	69	2	2	10	45	PUBLIC LIBRARY SCIENCE	SAN FRANCISCO	1160 BATTERY STREET, STE 100, SAN FRANCISCO, CA 94111 USA	1932-6203		PLOS ONE	PLoS One	2015-12-13	2013	8			10.1371/journal.pone.0081867	14	Multidisciplinary Sciences	Science & Technology - Other Topics	276FP	WOS:000328734200016		United States Geological Survey (USGS)	This research was supported by the United States Geological Survey (USGS). The funders had no role in study design, data collection and analysis, decision to publish, or preparation of the manuscript.	12	e81867	24349141
	J	Wang, J|Fischer, DA|Barclay, T|Boyajian, TS|Crepp, JR|Schwamb, ME|Lintott, C|Jek, KJ|Smith, AM|Parrish, M|Schawinski, K|Schmitt, JR|Giguere, MJ|Brewer, JM|Lynn, S|Simpson, R|Hoekstra, AJ|Jacobs, TL|LaCourse, D|Schwengeler, HM|Chopin, M|Herszkowicz, R	Wang, Ji|Fischer, Debra A.|Barclay, Thomas|Boyajian, Tabetha S.|Crepp, Justin R.|Schwamb, Megan E.|Lintott, Chris|Jek, Kian J.|Smith, Arfon M.|Parrish, Michael|Schawinski, Kevin|Schmitt, Joseph R.|Giguere, Matthew J.|Brewer, John M.|Lynn, Stuart|Simpson, Robert|Hoekstra, Abe J.|Jacobs, Thomas Lee|LaCourse, Daryll|Schwengeler, Hans Martin|Chopin, Mike|Herszkowicz, Rafal	PLANET HUNTERS. V. A CONFIRMED JUPITER-SIZE PLANET IN THE HABITABLE ZONE AND 42 PLANET CANDIDATES FROM THE KEPLER ARCHIVE DATA (vol 776, pg 10, 2013)	ASTROPHYSICAL JOURNAL	English	Correction				[Wang, Ji; Fischer, Debra A.; Boyajian, Tabetha S.; Schmitt, Joseph R.; Giguere, Matthew J.; Brewer, John M.] Yale Univ, Dept Astron, New Haven, CT 06511 USA.|[Barclay, Thomas] NASA, Ames Res Ctr, Moffett Field, CA 94035 USA.|[Barclay, Thomas] Bay Area Environm Res Inst Inc, Sonoma, CA 95476 USA.|[Crepp, Justin R.] Univ Notre Dame, Dept Phys, Notre Dame, IN 46556 USA.|[Schwamb, Megan E.] Yale Uni…	Wang, J (reprint author), Yale Univ, Dept Astron, New Haven, CT 06511 USA.	ji.wang@yale.edu	WANG J, 2013, APJ, V76	1	0	0	2	6	IOP PUBLISHING LTD	BRISTOL	TEMPLE CIRCUS, TEMPLE WAY, BRISTOL BS1 6BE, ENGLAND	0004-637X	1538-4357	ASTROPHYS J	Astrophys. J.	2015-11-20	2013	778			10.1088/0004-637X/778/1/84	5	Astronomy & Astrophysics	Astronomy & Astrophysics	254AI	WOS:000327131700084				1	84
	J	Willett, KW|Lintott, CJ|Bamford, SP|Masters, KL|Simmons, BD|Casteels, KRV|Edmondson, EM|Fortson, LF|Kaviraj, S|Keel, WC|Melvin, T|Nichol, RC|Raddick, MJ|Schawinski, K|Simpson, RJ|Skibba, RA|Smith, AM|Thomas, D	Willett, Kyle W.|Lintott, Chris J.|Bamford, Steven P.|Masters, Karen L.|Simmons, Brooke D.|Casteels, Kevin R. V.|Edmondson, Edward M.|Fortson, Lucy F.|Kaviraj, Sugata|Keel, William C.|Melvin, Thomas|Nichol, Robert C.|Raddick, M. Jordan|Schawinski, Kevin|Simpson, Robert J.|Skibba, Ramin A.|Smith, Arfon M.|Thomas, Daniel	Galaxy Zoo 2: detailed morphological classifications for 304 122 galaxies from the Sloan Digital Sky Survey	MONTHLY NOTICES OF THE ROYAL ASTRONOMICAL SOCIETY	English	Article	methods: data analysis; catalogues; galaxies: elliptical and lenticular; galaxies: general; galaxies: spiral	EARLY DATA RELEASE; MILKY-WAY PROJECT; DISC GALAXIES; HUBBLE SEQUENCE; NEARBY GALAXIES; PLANET HUNTERS; STAR-FORMATION; CATALOG; SDSS; REDSHIFT	We present the data release for Galaxy Zoo 2 (GZ2), a citizen science project with more than 16 million morphological classifications of 304 122 galaxies drawn from the Sloan Digital Sky Survey (SDSS). Morphology is a powerful probe for quantifying a galaxy's dynamical history; however, automatic classifications of morphology (either by computer analysis of images or by using other physical param…	[Willett, Kyle W.; Fortson, Lucy F.] Univ Minnesota, Sch Phys & Astron, Minneapolis, MN 55455 USA.|[Lintott, Chris J.; Simmons, Brooke D.; Kaviraj, Sugata; Simpson, Robert J.] Oxford Astrophys, Oxford OX1 3RH, England.|[Lintott, Chris J.; Smith, Arfon M.] Adler Planetarium, Chicago, IL 60605 USA.|[Bamford, Steven P.] Univ Nottingham, Sch Phys & Astron, Nottingham NG7 2RD, England.|[Masters, Karen…	Willett, KW (reprint author), Univ Minnesota, Sch Phys & Astron, 116 Church St SE, Minneapolis, MN 55455 USA.	willett@physics.umn.edu	Abazajian KN, 2009, ASTROPHYS J SUPPL S, V182, P543, DOI 10.1088/0067-0049/182/2/543|Aguerri JAL, 2009, ASTRON ASTROPHYS, V495, P491, DOI 10.1051/0004-6361:200810931|Ahn C. P., 2013, PREPRINT|Annis J., 2011, PREPRINT|Schmidt M, 2009, SCIENCE, V324, P81, DOI 10.1126/science.1165893|Stoughton C, 2002, ASTRON J, V123, P485, DOI 10.1086/324741|Lintott CJ, 2008, MON NOT R ASTRON SOC, V389, P1179, DOI …	60	25	25	3	18	OXFORD UNIV PRESS	OXFORD	GREAT CLARENDON ST, OXFORD OX2 6DP, ENGLAND	0035-8711	1365-2966	MON NOT R ASTRON SOC	Mon. Not. Roy. Astron. Soc.	NOV	2013	435	2835	2860	10.1093/mnras/stt1458	26	Astronomy & Astrophysics	Astronomy & Astrophysics	236DP	WOS:000325774700006		Leverhulme Trust; US National Science Foundation [DRL-0941610]; Science and Technology Facilities Council (STFC) Science in Society programme; Swiss National Science Foundation [PP00P2_138979/1]; STFC [ST/J500665/1, ST/K00090X/1]; Worcester College, Oxford; Oxford Martin School; National Aeronautics and Space Administration's Earth Science Technology Office [NCC5-626]; California Institute of Tec…	The development of GZ2 was supported by The Leverhulme Trust. KWW and LFF would like to acknowledge support from the US National Science Foundation under grant DRL-0941610. CJL acknowledges support from the Science and Technology Facilities Council (STFC) Science in Society programme. KS gratefully acknowledges support from Swiss National Science Foundation Grant PP00P2_138979/1. TM acknowledges …	4			Bamford, Steven/0000-0001-7821-7195
	J	Wang, J|Fischer, DA|Barclay, T|Boyajian, TS|Crepp, JR|Schwamb, ME|Lintott, C|Jek, KJ|Smith, AM|Parrish, M|Schawinski, K|Schmitt, JR|Giguere, MJ|Brewer, JM|Lynn, S|Simpson, R|Hoekstra, AJ|Jacobs, TL|LaCourse, D|Schwengeler, HM|Chopin, M|Herszkowicz, R	Wang, Ji|Fischer, Debra A.|Barclay, Thomas|Boyajian, Tabetha S.|Crepp, Justin R.|Schwamb, Megan E.|Lintott, Chris|Jek, Kian J.|Smith, Arfon M.|Parrish, Michael|Schawinski, Kevin|Schmitt, Joseph R.|Giguere, Matthew J.|Brewer, John M.|Lynn, Stuart|Simpson, Robert|Hoekstra, Abe J.|Jacobs, Thomas Lee|LaCourse, Daryll|Schwengeler, Hans Martin|Chopin, Mike|Herszkowicz, Rafal	PLANET HUNTERS. V. A CONFIRMED JUPITER-SIZE PLANET IN THE HABITABLE ZONE AND 42 PLANET CANDIDATES FROM THE KEPLER ARCHIVE DATA	ASTROPHYSICAL JOURNAL	English	Article	planets and satellites: detection; techniques: photometric; techniques: radial velocities; techniques: spectroscopic; surveys	SOLAR-TYPE STARS; INPUT CATALOG; CHROMOSPHERIC ACTIVITY; LIGHT CURVES; II. ANALYSIS; DATA RELEASE; GALAXY ZOO; M-DWARF; KECK; EXOPLANETS	We report the latest Planet Hunter results, including PH2 b, a Jupiter-size (R-PL = 10.12 +/- 0.56 R-circle plus) planet orbiting in the habitable zone of a solar-type star. PH2 b was elevated from candidate status when a series of false-positive tests yielded a 99.9% confidence level that transit events detected around the star KIC 12735740 had a planetary origin. Planet Hunter volunteers have a…	[Wang, Ji; Fischer, Debra A.; Boyajian, Tabetha S.; Schmitt, Joseph R.; Giguere, Matthew J.; Brewer, John M.] Yale Univ, Dept Astron, New Haven, CT 06511 USA.|[Barclay, Thomas] NASA, Ames Res Ctr, Moffett Field, CA 94035 USA.|[Barclay, Thomas] Bay Area Environm Res Inst Inc, Sonoma, CA 95476 USA.|[Crepp, Justin R.] Univ Notre Dame, Dept Phys, Notre Dame, IN 46556 USA.|[Schwamb, Megan E.] Yale Uni…	Wang, J (reprint author), Yale Univ, Dept Astron, New Haven, CT 06511 USA.	ji.wang@yale.edu	Sasaki T, 2010, ASTROPHYS J, V714, P1052, DOI 10.1088/0004-637X/714/2/1052|Mandel K, 2002, ASTROPHYS J, V580, pL171, DOI 10.1086/345520|Lintott CJ, 2008, MON NOT R ASTRON SOC, V389, P1179, DOI 10.1111/j.1365-2966.2008.13689.x|Dotter A, 2008, ASTROPHYS J SUPPL S, V178, P89, DOI 10.1086/589654|Lintott C, 2011, MON NOT R ASTRON SOC, V410, P166, DOI 10.1111/j.1365-2966.2010.17432.x|Koch DG, 2010, AST…	66	11	11	2	15	IOP PUBLISHING LTD	BRISTOL	TEMPLE CIRCUS, TEMPLE WAY, BRISTOL BS1 6BE, ENGLAND	0004-637X		ASTROPHYS J	Astrophys. J.	OCT 10	2013	776			10.1088/0004-637X/776/1/10	18	Astronomy & Astrophysics	Astronomy & Astrophysics	225UM	WOS:000324989000010		Yale University; NASA [10-OUTRCH.210-0001, ADAP12-0172, NAS5-26555]; NSF Astronomy and Astrophysics Postdoctoral Fellowship [AST-100325]; American Philosophical Society; Swiss National Science Foundation [PP00P2_138979/1]; Leverhulme Trust; Alfred P. Sloan foundation; NASA JPL's PlanetQuest program; National Science Foundation [DRL-0941610]; National Aeronautics and Space Administration; NASA Sci…	D.F. acknowledges funding support for PlanetHunters.org from Yale University and support from the NASA Supplemental Outreach Award, 10-OUTRCH.210-0001, and the NASA ADAP12-0172. M. E. S. is supported by an NSF Astronomy and Astrophysics Postdoctoral Fellowship under award AST-100325 and in part by an American Philosophical Society Grant. K. S. gratefully acknowledges support from Swiss National S…	1	10
	J	Culbert, PD|Radeloff, VC|Flather, CH|Kellndorfer, JM|Rittenhouse, CD|Pidgeon, AM	Culbert, Patrick D.|Radeloff, Volker C.|Flather, Curtis H.|Kellndorfer, Josef M.|Rittenhouse, Chadwick D.|Pidgeon, Anna M.	THE INFLUENCE OF VERTICAL AND HORIZONTAL HABITAT STRUCTURE ON NATIONWIDE PATTERNS OF AVIAN BIODIVERSITY	AUK	English	Article	biodiversity; biomass; Breeding Bird Survey; canopy height; NBCD; NLCD; structure	BIRD SPECIES RICHNESS; VEGETATION STRUCTURE; FOREST STRUCTURE; COMMUNITY COMPOSITION; LANDSCAPE STRUCTURE; LIDAR MEASUREMENTS; CANOPY STRUCTURE; UNITED-STATES; DIVERSITY; ENERGY	With limited resources for habitat conservation, the accurate identification of high-value avian habitat is crucial. Habitat structure affects avian biodiversity but is difficult to quantify over broad extents. Our goal was to identify which measures of vertical and horizontal habitat structure are most strongly related to patterns of avian biodiversity across the conterminous United States and t…	[Culbert, Patrick D.; Radeloff, Volker C.; Pidgeon, Anna M.] Univ Wisconsin, Dept Forest & Wildlife Ecol, Madison, WI 53706 USA.|[Flather, Curtis H.] US Forest Serv, USDA, Rocky Mt Res Stn, Ft Collins, CO 80526 USA.|[Kellndorfer, Josef M.] Woods Hole Res Ctr, Falmouth, MA 02540 USA.|[Rittenhouse, Chadwick D.] Univ Connecticut, Dept Nat Resources & Environm, Storrs, CT 06269 USA.	Culbert, PD (reprint author), Univ Wisconsin, Dept Forest & Wildlife Ecol, Madison, WI 53706 USA.	pdculbert@wisc.edu	Atauri JA, 2001, LANDSCAPE ECOL, V16, P147, DOI 10.1023/A:1011115921050|Hawkins BA, 2003, ECOLOGY, V84, P3105, DOI 10.1890/03-8006|Homer C, 2004, PHOTOGRAMM ENG REM S, V70, P829|Buckton ST, 2002, FRESHWATER BIOL, V47, P695, DOI 10.1046/j.1365-2427.2002.00891.x|Kellndorfer J, 2004, REMOTE SENS ENVIRON, V93, P339, DOI 10.1016/j.rse.2004.07.017|Clawges R, 2008, REMOTE SENS ENVIRON, V112, P2064, DOI …	68	9	9	13	44	AMER ORNITHOLOGISTS UNION	LAWRENCE	ORNITHOLOGICAL SOC NORTH AMER PO BOX 1897, LAWRENCE, KS 66044-8897 USA	0004-8038	1938-4254	AUK	AUK	OCT	2013	130	656	665	10.1525/auk.2013.13007	10	Ornithology	Zoology	274EM	WOS:000328588800010		NASA Biodiversity Program; NASA Terrestrial Ecology Program; NASA Earth Systems Science Fellowship; U.S. Forest Service Rocky Mountain Research Station	Supplemental material for this article is available at dx.doi.org/10.1525/auk.2013.13007. We gratefully acknowledge support by the NASA Biodiversity Program, NASA Terrestrial Ecology Program, a NASA Earth Systems Science Fellowship to P. Culbert, and the U.S. Forest Service Rocky Mountain Research Station. We also thank the numerous volunteer observers that participate in the BBS-without their sk…	4			Flather, Curtis/0000-0002-0623-3126	Flather, Curtis/G-3577-2012
	J	Lintott, C|Masters, K|Simmons, B|Bamford, S|Kaviraj, S	Lintott, Chris|Masters, Karen|Simmons, Brooke|Bamford, Steven|Kaviraj, Sugata	Morphology in the era of large surveys	ASTRONOMY & GEOPHYSICS	English	Article		ARTIFICIAL NEURAL-NETWORKS; DIGITAL SKY SURVEY; GALAXY ZOO; BLACK-HOLES; STAR-FORMATION; DISC GALAXIES; ACCRETION; GAS		[Lintott, Chris; Simmons, Brooke] Univ Oxford, Oxford OX1 2JD, England.|[Masters, Karen] Univ Portsmouth, Inst Cosmol & Gravitat, Portsmouth PO1 2UP, Hants, England.|[Bamford, Steven] Univ Nottingham, Nottingham NG7 2RD, England.|[Kaviraj, Sugata] Univ Hertfordshire, Hatfield AL10 9AB, Herts, England.	Lintott, C (reprint author), Univ Oxford, Oxford OX1 2JD, England.	Karen.Masters@port.ac.uk	Dekel A, 2009, ASTROPHYS J, V703, P785, DOI 10.1088/0004-637X/703/1/785|Athanassoula E, 2013, MON NOT R ASTRON SOC, V429, P1949, DOI 10.1093/mnras/sts452|Ball NM, 2004, MON NOT R ASTRON SOC, V348, P1038, DOI 10.1111/j.1365-2966.2004.07429.x|Kormendy J, 2012, ASTROPHYS J SUPPL S, V198, DOI 10.1088/0067-0049/198/1/2|Debattista VP, 2013, ASTROPHYS J, V765, DOI 10.1088/0004-637X/765/1/23|Gadotti DA, …	17	0	0	1	2	OXFORD UNIV PRESS	OXFORD	GREAT CLARENDON ST, OXFORD OX2 6DP, ENGLAND	1366-8781	1468-4004	ASTRON GEOPHYS	Astron. Geophys.	OCT	2013	54	16	19		4	Astronomy & Astrophysics; Geochemistry & Geophysics	Astronomy & Astrophysics; Geochemistry & Geophysics	259DH	WOS:000327507100026				5
	J	Garcia-Hernandez, J|Glenn, EP|Flessa, K	Garcia-Hernandez, Jaqueline|Glenn, Edward P.|Flessa, Karl	Identification of chemicals of potential concern (COPECs) in anthropogenic wetlands of the Colorado River delta	ECOLOGICAL ENGINEERING	English	Article	Toxicological benchmarks; Colorado River delta; Mercury; Arsenic; Selenium; Organochlorine pesticides	FRESH-WATER FISH; BAJA-CALIFORNIA; EMERGING CONCERN; MEXICALI VALLEY; CONTAMINANTS; SELENIUM; MERCURY; STATES; DDT	An early step in an Ecological Risk Assessment (ERA) process is the screening of chemicals to identify those that constitute a potential risk by comparing concentrations to levels that are believed to be nonhazardous or "benchmarks". In the present study we analyzed concentrations of metals and metalloids (mercury, arsenic, selenium, and copper) as well as organochlorine pesticides in samples of …	[Garcia-Hernandez, Jaqueline] AC CIAD Guaymas, Ctr Invest Alimentac & Desarrollo, Guaymas 85480, Sonora, Mexico.|[Glenn, Edward P.] Univ Arizona, Dept Soil Water & Environm Sci, Tucson, AZ 85721 USA.|[Flessa, Karl] Univ Arizona, Dept Geosci, Tucson, AZ 85721 USA.	Garcia-Hernandez, J (reprint author), AC CIAD Guaymas, Ctr Invest Alimentac & Desarrollo, Carretera Varadero Nacl Km 6-6, Guaymas 85480, Sonora, Mexico.	jaqueline@ciad.mx	Kolpin DW, 2002, ENVIRON SCI TECHNOL, V36, P1202, DOI 10.1021/es011055j|SORENSEN JA, 1990, ENVIRON SCI TECHNOL, V24, P1716, DOI 10.1021/es00081a015|Wintgens T, 2008, WATER SCI TECHNOL, V57, P99, DOI 10.2166/wst.2008.799|Bargagli R, 1997, ARCH ENVIRON CON TOX, V33, P172, DOI 10.1007/s002449900239|Brown K.W., 1983, HAZARDOUS WASTE LAND, P240|CCME, 2001, CAN ENV QUAL GUID 19, P1999|CEC, 2011, N AM P…	45	3	3	5	30	ELSEVIER SCIENCE BV	AMSTERDAM	PO BOX 211, 1000 AE AMSTERDAM, NETHERLANDS	0925-8574	1872-6992	ECOL ENG	Ecol. Eng.	OCT	2013	59	52	60	10.1016/j.ecoleng.2013.04.045	9	Ecology; Engineering, Environmental; Environmental Sciences	Environmental Sciences & Ecology; Engineering	235VY	WOS:000325750400006		Sonoran Institute; Pronatura Noroeste and Fondo Mexicano de la Conservacion	We thank German Leyva-Garcia for collection of samples, processing samples and aid in the analysis of metals, Martin Jara for the analysis of selenium, Daniela Aguilera-Marquez for sample extraction for pesticide analysis and Pedro Bastidas for the analyses of organochlorine pesticides. We thank all the participants in the Colorado River delta working group who have contributed to this work on di…
	J	Cooper, S|Khatib, F|Baker, D	Cooper, Seth|Khatib, Firas|Baker, David	Increasing Public Involvement in Structural Biology	STRUCTURE	English	Editorial Material		PLAYERS	Public participation in scientific research can be a powerful supplement to more-traditional approaches. We discuss aspects of the public participation project Foldit that may help others interested in starting their own projects.	[Cooper, Seth] Univ Washington, Dept Comp Sci, Seattle, WA 98195 USA.|[Khatib, Firas; Baker, David] Univ Washington, Dept Biochem, Seattle, WA 98195 USA.	Cooper, S (reprint author), Univ Washington, Dept Comp Sci, Seattle, WA 98195 USA.	scooper@cs.washington.edu	Eiben CB, 2012, NAT BIOTECHNOL, V30, P190, DOI 10.1038/nbt.2109|Kawrykow A, 2012, PLOS ONE, V7, DOI 10.1371/journal.pone.0031362|Khatib F, 2011, NAT STRUCT MOL BIOL, V18, P1175, DOI 10.1038/nsmb.2119|Leaver-Fay Andrew, 2011, Methods Enzymol, V487, P545, DOI 10.1016/B978-0-12-381270-4.00019-6|Lintott CJ, 2009, MON NOT R ASTRON SOC, V399, P129, DOI 10.1111/j.1365-2966.2009.15299.x	5	2	2	5	8	CELL PRESS	CAMBRIDGE	600 TECHNOLOGY SQUARE, 5TH FLOOR, CAMBRIDGE, MA 02139 USA	0969-2126	1878-4186	STRUCTURE	Structure	2015-09-03	2013	21	1482	1484	10.1016/j.str.2013.08.009	3	Biochemistry & Molecular Biology; Biophysics; Cell Biology	Biochemistry & Molecular Biology; Biophysics; Cell Biology	297PY	WOS:000330268600003				9		24010706
	J	Martinez, HJ|Coenda, V|Muriel, H	Martinez, Hector J.|Coenda, Valeria|Muriel, Hernan	Comparing galaxy populations in compact and loose groups of galaxies II. Brightest group galaxies	ASTRONOMY & ASTROPHYSICS	English	Article	galaxies: groups: general; galaxies: fundamental parameters; galaxies: evolution	DIGITAL SKY SURVEY; 6TH DATA RELEASE; CLUSTER GALAXIES; STELLAR MASS; LUMINOSITY FUNCTION; ENVIRONMENT; EVOLUTION; REDSHIFT; BUILDUP; MERGERS	Aims. The properties of the brightest galaxies (BCGs) are studied in both compact and loose groups of galaxies in order to better understand the physical mechanisms influencing galaxy evolution in different environments. Methods. Samples of BCGs are selected in compact and loose groups of galaxies previously identified in the Sloan Digital Sky Survey. The following physical properties of the BCGs…	[Martinez, Hector J.; Coenda, Valeria; Muriel, Hernan] Univ Nacl Cordoba, CONICET Observ Astron, IATE, RA-5000 Cordoba, Argentina.	Martinez, HJ (reprint author), Univ Nacl Cordoba, CONICET Observ Astron, IATE, Laprida 854,X5000BGR, RA-5000 Cordoba, Argentina.	julian@oac.uncor.edu	Abazajian KN, 2009, ASTROPHYS J SUPPL S, V182, P543, DOI 10.1088/0067-0049/182/2/543|Allam S. S., 2000, Astronomische Nachrichten, V321, DOI 10.1002/(SICI)1521-3994(200005)321:2<101::AID-ASNA101>3.0.CO;2-5|Lidman C, 2012, MON NOT R ASTRON SOC, V427, P550, DOI 10.1111/j.1365-2966.2012.21984.x|Adelman-McCarthy JK, 2008, ASTROPHYS J SUPPL S, V175, P297, DOI 10.1086/524984|Strateva I, 2001, ASTRON J,…	42	2	2	1	2	EDP SCIENCES S A	LES ULIS CEDEX A	17, AVE DU HOGGAR, PA COURTABOEUF, BP 112, F-91944 LES ULIS CEDEX A, FRANCE	0004-6361	1432-0746	ASTRON ASTROPHYS	Astron. Astrophys.	SEP	2013	557			10.1051/0004-6361/201321931	7	Astronomy & Astrophysics	Astronomy & Astrophysics	228TC	WOS:000325211900136		CONICET [PIP 11220080102603, 11220100100336]; Ministerio de Ciencia y Tecnologia de la Provincia de Cordoba, Argentina [PID 2008/14797627]; Secretaria de Ciencia y Tecnologia Universidad Nacional de Cordoba, Argentina; Alfred P. Sloan Foundation; National Aeronautics and Space Administration; National Science Foundation; U.S. Department of Energy; Japanese Monbukagakusho; Max Planck Society; Univ…	This work was supported with grants from CONICET (PIP 11220080102603 and 11220100100336); Ministerio de Ciencia y Tecnologia de la Provincia de Cordoba, Argentina (PID 2008/14797627); and Secretaria de Ciencia y Tecnologia Universidad Nacional de Cordoba, Argentina. Funding for the Sloan Digital Sky Survey (SDSS) was provided by the Alfred P. Sloan Foundation, the Participating Institutions, the …		A61
	J	Knape, J|Besbeas, P|de Valpine, P	Knape, Jonas|Besbeas, Panagiotis|de Valpine, Perry	Using uncertainty estimates in analyses of population time series	ECOLOGY	English	Article	abundance data; breeding bird survey; Gompertz state-space model; Kalman filter; observation error; Ovenbird; process noise; replicated sampling	STATE-SPACE MODELS; DENSITY-DEPENDENCE; OBSERVATION ERROR; ANIMAL ABUNDANCE; PROCESS NOISE; DYNAMICS; PARAMETERS	Recording and monitoring wildlife is crucial for the conservation of wild species and the protection of their environment. The most common type of information reported from a monitoring scheme is a time series of population abundance estimates, but the potential of such data for analyzing population dynamics is limited due to lack of information on sampling error. Recent work has shown that repli…	[Knape, Jonas; de Valpine, Perry] Univ Calif Berkeley, Dept Environm Sci Policy & Management, Berkeley, CA 94720 USA.|[Besbeas, Panagiotis] Athens Univ Econ & Business, Dept Stat, Athens 10434, Greece.	Knape, J (reprint author), Swedish Univ Agr Sci, Dept Ecol, Box 7044, S-75007 Uppsala, Sweden.	jonas.knape@slu.se	Anderson B. D. O., 1979, OPTIMAL FILTERING|Dennis B, 2006, ECOL MONOGR, V76, P323, DOI 10.1890/0012-9615(2006)76[323:EDDPNA]2.0.CO;2|Freckleton RP, 2006, J ANIM ECOL, V75, P837, DOI 10.1111/j.1365-2656.2006.01121.x|Staudenmayer J, 2005, J AM STAT ASSOC, V100, P841, DOI 10.1198/016214504000001871|Almaraz P, 2012, J ANIM ECOL, V81, P1113, DOI 10.1111/j.1365-2656.2012.01972.x|Besbeas P, 2002, BIOMET…	35	4	4	7	34	ECOLOGICAL SOC AMER	WASHINGTON	1990 M STREET NW, STE 700, WASHINGTON, DC 20036 USA	0012-9658	1939-9170	ECOLOGY	Ecology	SEP	2013	94	2097	2107	10.1890/12-0712.1	11	Ecology	Environmental Sciences & Ecology	219TL	WOS:000324532900022		Fulbright Research Scholar grant; BRFP-AUEB	Two reviewers provided helpful comments that improved the paper. The work was initiated under a Fulbright Research Scholar grant to Panagiotis Besbeas to visit the Department of Environmental Science, Policy, and Management at UC-Berkeley, and supported in part by a BRFP-AUEB.	9		24279280	Besbeas, Panagiotis/0000-0002-1579-4152
	J	Rodriguez, S|Padilla, ND	Rodriguez, Silvio|Padilla, Nelson D.	The intrinsic shape of galaxies in SDSS/Galaxy Zoo	MONTHLY NOTICES OF THE ROYAL ASTRONOMICAL SOCIETY	English	Article	surveys; galaxies: fundamental parameters; galaxies: general; galaxies: structure	DIGITAL-SKY-SURVEY; ELLIPTIC GALAXIES; SPIRAL GALAXIES; DATA RELEASE; LUMINOSITY FUNCTION; DISK GALAXIES; COLD DUST; 1ST DATA; EXTINCTION; CATALOG	By modelling the axis ratio distribution of Sloan Digital Sky Survey (SDSS) Data Release 8 galaxies, we find the intrinsic 3D shapes of spirals and ellipticals. We use morphological information from the Galaxy Zoo project and assume a non-parametric distribution intrinsic of shapes, while taking into account dust extinction. We measure the dust extinction of the full sample of spiral galaxies and…	[Rodriguez, Silvio; Padilla, Nelson D.] Pontificia Univ Catolica Chile, Dept Astron & Astrofis, Santiago 7820436, Chile.|[Padilla, Nelson D.] Pontificia Univ Catolica Chile, Ctr Astroingn, Santiago 7820436, Chile.	Rodriguez, S (reprint author), Pontificia Univ Catolica Chile, Dept Astron & Astrofis, Santiago 7820436, Chile.	sirodrig@uc.cl	Abazajian K, 2005, ASTRON J, V129, P1755, DOI 10.1086/427544|Abazajian K, 2004, ASTRON J, V128, P502, DOI 10.1086/421365|Abazajian K, 2003, ASTRON J, V126, P2081, DOI 10.1086/378165|Abazajian KN, 2009, ASTROPHYS J SUPPL S, V182, P543, DOI 10.1088/0067-0049/182/2/543|Aihara H, 2011, ASTROPHYS J SUPPL S, V193, DOI 10.1088/0067-0049/193/2/29|Andersen D. R., 2003, APJ, V559, P79|Andersen D.R., 2001, …	72	4	4	3	7	OXFORD UNIV PRESS	OXFORD	GREAT CLARENDON ST, OXFORD OX2 6DP, ENGLAND	0035-8711		MON NOT R ASTRON SOC	Mon. Not. Roy. Astron. Soc.	SEP	2013	434	2153	2166	10.1093/mnras/stt1168	14	Astronomy & Astrophysics	Astronomy & Astrophysics	207YE	WOS:000323639900025		Centro de Astronomia y Tecnologias Afines (CATA) [BASAL PFB-06]; Proyecto Fondecyt Regular [1110328]; Alfred P. Sloan Foundation; National Science Foundation; US Department of Energy Office of Science; University of Arizona; Brazilian Participation Group; Brookhaven National Laboratory; University of Cambridge; Carnegie Mellon University; University of Florida; French Participation Group; German …	SR was supported by Centro de Astronomia y Tecnologias Afines (CATA) BASAL PFB-06. NP was supported by Proyecto Fondecyt Regular 1110328.Funding for SDSS-III has been provided by the Alfred P. Sloan Foundation, the Participating Institutions, the National Science Foundation and the US Department of Energy Office of Science. The SDSS-III website is http://www.sdss3.org/.SDSS-III is managed by the …	3
	J	He, YQ|Xia, XY|Hao, CN|Jing, YP|Mao, S|Li, C	He, Y. Q.|Xia, X. Y.|Hao, C. N.|Jing, Y. P.|Mao, S.|Li, Cheng	PHOTOMETRIC PROPERTIES AND LUMINOSITY FUNCTION OF NEARBY MASSIVE EARLY-TYPE GALAXIES	ASTROPHYSICAL JOURNAL	English	Article	galaxies: elliptical and lenticular, cD; galaxies: luminosity function, mass function; galaxies: photometry	DIGITAL SKY SURVEY; BRIGHTEST CLUSTER GALAXIES; DATA RELEASE; VELOCITY DISPERSIONS; QUIESCENT GALAXIES; SURFACE BRIGHTNESS; FORMATION HISTORY; RED GALAXIES; EVOLUTION; REDSHIFT	We perform photometric analyses of a bright early-type galaxy sample with 2949 galaxies (M-r < -22.5 mag) in the redshift range of 0.05-0.15, drawn from the Sloan Digital Sky Survey (SDSS) DR7 with morphological classification from Galaxy Zoo 1. We measure the Petrosian and isophotal magnitudes, as well as the corresponding half-light radius for each galaxy. We find that for the brightest galaxie…	[He, Y. Q.] Univ Chinese Acad Sci, Beijing 100049, Peoples R China.|[He, Y. Q.; Mao, S.] Chinese Acad Sci, Natl Astron Observ, Beijing 100012, Peoples R China.|[He, Y. Q.; Xia, X. Y.; Hao, C. N.] Tianjin Normal Univ, Tianjin Astrophys Ctr, Tianjin 300387, Peoples R China.|[Jing, Y. P.] Shanghai Jiao Tong Univ, Dept Phys & Astron, Ctr Astron & Astrophys, Shanghai 200240, Peoples R China.|[Mao, S.]…	He, YQ (reprint author), Univ Chinese Acad Sci, Beijing 100049, Peoples R China.	xyxia@bao.ac.cn	Abazajian K, 2004, ASTRON J, V128, P502, DOI 10.1086/421365|Aihara H, 2011, ASTROPHYS J SUPPL S, V193, DOI 10.1088/0067-0049/193/2/29|Daddi E, 2005, ASTROPHYS J, V626, P680, DOI 10.1086/430104|Stoughton C, 2002, ASTRON J, V123, P485, DOI 10.1086/324741|Blanton MR, 2007, ASTRON J, V133, P734, DOI 10.1086/510127|Trujillo I, 2006, ASTROPHYS J, V650, P18, DOI 10.1086/506464|Lintott C, 2011, MON NOT R…	60	7	7	0	6	IOP PUBLISHING LTD	BRISTOL	TEMPLE CIRCUS, TEMPLE WAY, BRISTOL BS1 6BE, ENGLAND	0004-637X		ASTROPHYS J	Astrophys. J.	2015-08-10	2013	773			10.1088/0004-637X/773/1/37	12	Astronomy & Astrophysics	Astronomy & Astrophysics	193BN	WOS:000322531900037		NSF of China [10973011, 10833006, 11003015]; Chinese Academy of Sciences; NAOC; NSFC [11033006, 11121062]; CAS/SAFEA International Partnership Program for Creative Research Teams [KJCX2-YW-T23]; Alfred P. Sloan Foundation; National Aeronautics and Space Administration; National Science Foundation; U.S. Department of Energy; Japanese Monbukagakusho; Max Planck Society; University of Chicago; Fermi…	We thank Drs. J. S. Huang, F. S. Liu, Z. H. Shang, Qi Guo, H. J. Yan, and C. G. Shu for advice and helpful discussions. We also thank the anonymous referee for constructive comments. This project is supported by the NSF of China 10973011, 10833006, 11003015, the Chinese Academy of Sciences, and NAOC (S. M.). Y. P. J. is supported by NSFC (11033006 and 11121062) and the CAS/SAFEA International Par…	1	37			he, shuyi/K-2082-2014
	J	Loguercio, S|Good, BM|Su, AI	Loguercio, Salvatore|Good, Benjamin M.|Su, Andrew I.	Dizeez: An Online Game for Human Gene-Disease Annotation	PLOS ONE	English	Article		KNOWLEDGE; WIKI	Structured gene annotations are a foundation upon which many bioinformatics and statistical analyses are built. However the structured annotations available in public databases are a sparse representation of biological knowledge as a whole. The rate of biomedical data generation is such that centralized biocuration efforts struggle to keep up. New models for gene annotation need to be explored th…	[Loguercio, Salvatore; Good, Benjamin M.; Su, Andrew I.] Scripps Res Inst, Dept Mol & Expt Med, La Jolla, CA 92037 USA.	Su, AI (reprint author), Scripps Res Inst, Dept Mol & Expt Med, 10666 N Torrey Pines Rd, La Jolla, CA 92037 USA.	asu@scripps.edu	Huang DW, 2009, NUCLEIC ACIDS RES, V37, P1, DOI 10.1093/nar/gkn923|Lintott CJ, 2008, MON NOT R ASTRON SOC, V389, P1179, DOI 10.1111/j.1365-2966.2008.13689.x|Howe D, 2008, NATURE, V455, P47, DOI 10.1038/455047a|Subramanian A, 2005, P NATL ACAD SCI USA, V102, P15545, DOI 10.1073/pnas.0506580102|Kelder T, 2012, NUCLEIC ACIDS RES, V40, pD1301, DOI 10.1093/nar/gkr1074|Schriml LM, 2012, NUCLEIC ACIDS R…	17	1	1	2	8	PUBLIC LIBRARY SCIENCE	SAN FRANCISCO	1160 BATTERY STREET, STE 100, SAN FRANCISCO, CA 94111 USA	1932-6203		PLOS ONE	PLoS One	2015-08-07	2013	8			10.1371/journal.pone.0071171	5	Multidisciplinary Sciences	Science & Technology - Other Topics	200ZE	WOS:000323109700084		National Institutes of Health [GM083924, GM089820]	This research was supported by the National Institutes of Health (GM083924 and GM089820 to AIS). The funders had no role in study design, data collection and analysis, decision to publish, or preparation of the manuscript.	8	e71171	23951102	Su, Andrew/0000-0002-9859-4104
	J	Kent, M	Kent, Michael	The importance of being Uros: Indigenous identity politics in the genomic age	SOCIAL STUDIES OF SCIENCE	English	Article	Andes; genetics; Genographic project; identity politics; indigenous movements	POSTCOLONIAL CONTEXTS; NEW-WORLD; GENETICS; RACE; ANTHROPOLOGY; POPULATION; PROJECT	The objective of this article is to explore the interrelations between human population genomic research, the political strategies of indigenous movements and processes of identity formation. It will do so by analysing the collaboration between the Uros, an indigenous group living on artificial floating islands on Lake Titicaca (Peru), and researchers of the Genographic Project. Claiming descent …	Univ Manchester, Dept Social Anthropol, Manchester M13 9PL, Lancs, England.	Kent, M (reprint author), Univ Manchester, Dept Social Anthropol, Arthur Lewis Bldg,Oxford Rd, Manchester M13 9PL, Lancs, England.	michael.kent@manchester.ac.uk	Abercrombie Tom, 1991, NATION STATES INDIAN, P95|Alberti G., 1974, RECIPROCIDAD INTERCA|Anderson Warwick, 2008, COLLECTORS LOST SOUL|Fujimura JH, 2011, SOC STUD SCI, V41, P5, DOI 10.1177/0306312710379170|Barth F., 1969, ETHNIC GROUPS BOUND, P9|Bouysse-Cassagne Therese, 1987, TRES REFLEXIONES PEN, P11|Brodwin P, 2005, CULT MED PSYCHIAT, V29, P139, DOI 10.1007/s11013-005-7422-3|Brodwin P, 2002, ANT…	64	3	3	2	8	SAGE PUBLICATIONS LTD	LONDON	1 OLIVERS YARD, 55 CITY ROAD, LONDON EC1Y 1SP, ENGLAND	0306-3127	1460-3659	SOC STUD SCI	Soc. Stud. Sci.	AUG	2013	43	534	556	10.1177/0306312712468520	23	History & Philosophy Of Science	History & Philosophy of Science	285XI	WOS:000329427900004		Economic and Social Research Council [RES-062-23-1914]; Leverhulme Foundation [RPG-044]; Royal Anthropological Institute through a Sutasoma Award; School of Social Sciences of the University of Manchester	This research has been financed by the Economic and Social Research Council through grant RES-062-23-1914, the Leverhulme Foundation through grant RPG-044, the Royal Anthropological Institute through a Sutasoma Award and the School of Social Sciences of the University of Manchester.	4					SI
	J	Chamberlain, DE|Austin, GE|Green, RE|Hulme, MF|Burton, NHK	Chamberlain, D. E.|Austin, G. E.|Green, R. E.|Hulme, M. F.|Burton, N. H. K.	Improved estimates of population trends of Great Cormorants Phalacrocorax carbo in England and Wales for effective management of a protected species at the centre of a human-wildlife conflict	BIRD STUDY	English	Article		WATERBIRDS; SINENSIS; DECLINES; BRITAIN	CapsuleA new method of estimating winter Great Cormorant population trends was developed to improve monitoring. AimsTo develop methods of estimating Cormorant population trends with confidence intervals by combining data from different monitoring schemes. MethodsEstimates of inland and coastal winter Cormorant populations were made for England and Wales from 1988 to 2010. Annual counts from the W…	[Chamberlain, D. E.] Univ Turin, Dipartimento Sci Vita & Biol Sistemi, I-10123 Turin, Italy.|[Austin, G. E.; Hulme, M. F.; Burton, N. H. K.] British Trust Ornithol, Thetford IP24 2PU, Norfolk, England.|[Green, R. E.] Royal Soc Protect Birds, Sandy SG19 2DL, Beds, England.|[Green, R. E.] Univ Cambridge, Dept Zool, Conservat Sci Grp, Cambridge, England.	Chamberlain, DE (reprint author), Univ Turin, Dipartimento Sci Vita & Biol Sistemi, Via Accademia Albertina 13, I-10123 Turin, Italy.	dan.chamberlain99@gmail.com	VANEERDEN MR, 1995, ARDEA, V83, P61|Atkinson PW, 2006, BIOL CONSERV, V130, P549, DOI 10.1016/j.biocon.2006.01.018|Central Science Laboratory, 2005, MOD CONS NEW CORM LI|Chamberlain D.E., J ORNITHOL|Feltham M.J., 1999, CASE STUDIES IMPACT|Fewster RM, 2000, ECOLOGY, V81, P1970, DOI 10.1890/0012-9658(2000)081[1970:AOPTFF]2.0.CO;2|Frederiksen M, 2000, J ANIM ECOL, V69, P737, DOI 10.1046/j.1365-2656.2…	21	0	0	2	17	TAYLOR & FRANCIS LTD	ABINGDON	4 PARK SQUARE, MILTON PARK, ABINGDON OX14 4RN, OXON, ENGLAND	0006-3657	1944-6705	BIRD STUDY	Bird Stud.	2015-08-01	2013	60	335	344	10.1080/00063657.2013.798258	10	Ornithology	Zoology	248PL	WOS:000326713500006		Food and Environment Research Agency (FERA) by the UK Department for Environment, Food and Rural Affairs (DEFRA)	This work was funded through the Food and Environment Research Agency (FERA) by the UK Department for Environment, Food and Rural Affairs (DEFRA). Our thanks go to Tim Andrews and Ashley Smith from DEFRA, and also to members of the Fish-eating Birds Policy Review Group and to Aonghais Cook, Stuart Newson and Alison Johnston (BTO) for their comments. We are also indebted to Graham Smith of FERA wh…	3			Chamberlain, Dan/0000-0002-5381-2024	Chamberlain, Dan/K-1809-2015;
	J	La Sorte, FA|Fink, D|Hochachka, WM|DeLong, JP|Kelling, S	La Sorte, Frank A.|Fink, Daniel|Hochachka, Wesley M.|DeLong, John P.|Kelling, Steve	Population-level scaling of avian migration speed with body size and migration distance for powered fliers	ECOLOGY	English	Article	avian migration; body size; eBird; macroecology; migration distance; migration speed; North America; optimal migration theory; powered flight; scale	TIME-MINIMIZATION HYPOTHESIS; BIRD MIGRATION; SEASONAL DIFFERENCES; SATELLITE TRACKING; AUTUMN MIGRATION; STRATEGIES; EVOLUTION; PREDATION; RAPTORS; ARRIVAL	Optimal migration theory suggests specific scaling relationships between body size and migration speed for individual birds based on the minimization of time, energy, and risk. Here we test if the quantitative predictions originating from this theory can be detected when migration decisions are integrated across individuals. We estimated population-level migration trajectories and daily migration…	[La Sorte, Frank A.; Fink, Daniel; Hochachka, Wesley M.; Kelling, Steve] Cornell Lab Ornithol, Ithaca, NY 14850 USA.|[DeLong, John P.] Univ Nebraska, Sch Biol Sci, Lincoln, NE 68588 USA.	La Sorte, FA (reprint author), Cornell Lab Ornithol, Ithaca, NY 14850 USA.	fal42@cornell.edu	Alerstam T., 1990, P331|Hedenstrom A, 2008, PHILOS T R SOC B, V363, P287, DOI 10.1098/rstb.2007.2140|Alerstam T, 2003, OIKOS, V103, P247, DOI 10.1034/j.1600-0706.2003.12559.x|Alerstam T, 2011, J ORNITHOL, V152, P5, DOI 10.1007/s10336-011-0694-1|[Anonymous], 2013, R LANG ENV STAT COMP|Sillett TS, 2002, J ANIM ECOL, V71, P296, DOI 10.1046/j.1365-2656.2002.00599.x|Sullivan BL, 2009, BIOL CONSERV, V1…	46	8	8	6	55	ECOLOGICAL SOC AMER	WASHINGTON	1990 M STREET NW, STE 700, WASHINGTON, DC 20036 USA	0012-9658		ECOLOGY	Ecology	AUG	2013	94	1839	1847	10.1890/12-1768.1	9	Ecology	Environmental Sciences & Ecology	190JU	WOS:000322336600018		Leon Levy Foundation; Wolf Creek Foundation; National Science Foundation [DBI-1125098, IIS-1017793]	We thank T. Fredericks, M. Iliff, J. Ward, and K. Webb for assistance with data acquisition and preparation. We thank A. Farnsworth, J. Fitzpatrick, M. Iliff, W. Jetz, B. Sullivan, D. Winkler, and C. Wood for valuable discussions, and two anonymous reviewers for constructive comments. We are grateful to the many eBird participants for their contributions. This work was funded by the Leon Levy Fou…	8		24015527
	J	Davies, PCW|Wagner, RV	Davies, P. C. W.|Wagner, R. V.	Searching for alien artifacts on the moon	ACTA ASTRONAUTICA	English	Article	SETI; Lunar reconnaissance orbiter; Extraterrestrial technology; Nuclear waste; Lava tubes; Regolith	EVOLUTION; UNIVERSE	The Search for Extraterrestrial Intelligence (SETI) has a low probability of success, but it would have a high impact if successful. Therefore it makes sense to widen the search as much as possible within the confines of the modest budget and limited resources currently available. To date, SETI has been dominated by the paradigm of seeking deliberately beamed radio messages. However, indirect evi…	[Davies, P. C. W.] Arizona State Univ, Ctr Fundamental Concepts Sci, Tempe, AZ 85287 USA.|[Wagner, R. V.] Arizona State Univ, Sch Earth & Space Explorat Lunar Recon Oribiter S, Tempe, AZ 85287 USA.	Davies, PCW (reprint author), Arizona State Univ, Ctr Fundamental Concepts Sci, POB 871504, Tempe, AZ 85287 USA.	deepthought@asu.edu	Robinson MS, 2010, SPACE SCI REV, V150, P81, DOI 10.1007/s11214-010-9634-2|Arbesman S, 2010, PLOS ONE, V5, DOI 10.1371/journal.pone.0013061|Ashley J.W., 2011, LUNAR PLANET SCI, V42, P2584|Bamford SP, 2009, MON NOT R ASTRON SOC, V393, P1324, DOI 10.1111/j.1365-2966.2008.14252.x|CARTER B, 1983, PHILOS T R SOC A, V310, P347, DOI 10.1098/rsta.1983.0096|Chin G, 2007, SPACE SCI REV, V129, P391, DOI 10.…	22	0	0	2	20	PERGAMON-ELSEVIER SCIENCE LTD	OXFORD	THE BOULEVARD, LANGFORD LANE, KIDLINGTON, OXFORD OX5 1GB, ENGLAND	0094-5765		ACTA ASTRONAUT	Acta Astronaut.	AUG-SEP	2013	89	261	265	10.1016/j.actaastro.2011.10.022	5	Engineering, Aerospace	Engineering	178AM	WOS:000321416500030
	J	Adolf-Bryfogle, J|Dunbrack, RL	Adolf-Bryfogle, Jared|Dunbrack, Roland L., Jr.	The PyRosetta Toolkit: A Graphical User Interface for the Rosetta Software Suite	PLOS ONE	English	Article		CRYSTALLOGRAPHIC PHASE PROBLEM; PROTEIN-PROTEIN DOCKING; STRUCTURE PREDICTION; ROTAMER PREFERENCES; DESIGN; SEQUENCES; ACCURACY; FOLDIT; SERVER; LOOP	The Rosetta Molecular Modeling suite is a command-line-only collection of applications that enable high-resolution modeling and design of proteins and other molecules. Although extremely useful, Rosetta can be difficult to learn for scientists with little computational or programming experience. To that end, we have created a Graphical User Interface (GUI) for Rosetta, called the PyRosetta Toolki…	[Adolf-Bryfogle, Jared; Dunbrack, Roland L., Jr.] Fox Chase Canc Ctr, Inst Canc Res, Philadelphia, PA 19111 USA.|[Adolf-Bryfogle, Jared] Drexel Univ, Coll Med, Program Mol & Cell Biol & Genet, Philadelphia, PA 19104 USA.	Dunbrack, RL (reprint author), Fox Chase Canc Ctr, Inst Canc Res, 7701 Burholme Ave, Philadelphia, PA 19111 USA.	Roland.Dunbrack@fccc.edu	Krivov GG, 2009, PROTEINS, V77, P778, DOI 10.1002/prot.22488|Shapovalov MV, 2011, STRUCTURE, V19, P844, DOI 10.1016/j.str.2011.03.019|Chaudhury S, 2010, BIOINFORMATICS, V26, P689, DOI 10.1093/bioinformatics/btq007|Leaver-Fay A, 2011, METHOD ENZYMOL, P545, DOI 10.1016/S0076-6879(11)87019-9|Das R, 2008, ANNU REV BIOCHEM, V77, P363, DOI 10.1146/annurev.biochem.77.062906.171838|Baugh EH, 2011, PLOS O…	38	3	3	6	12	PUBLIC LIBRARY SCIENCE	SAN FRANCISCO	1160 BATTERY STREET, STE 100, SAN FRANCISCO, CA 94111 USA	1932-6203		PLOS ONE	PLoS One	2015-07-09	2013	8			10.1371/journal.pone.0066856	8	Multidisciplinary Sciences	Science & Technology - Other Topics	182JD	WOS:000321736900006		National Institutes of Health [R01 GM84453]	Funding from National Institutes of Health R01 GM84453. The funders had no role in study design, data collection and analysis, decision to publish, or preparation of the manuscript.	7	e66856	23874400
	J	Chamberlain, DE|Austin, GE|Newson, SE|Johnston, A|Burton, NHK	Chamberlain, D. E.|Austin, G. E.|Newson, S. E.|Johnston, A.|Burton, N. H. K.	Licensed control does not reduce local Cormorant Phalacrocorax carbo population size in winter	JOURNAL OF ORNITHOLOGY	English	Article	Culling; Disturbance; Fisheries; Human-wildlife conflict; Population growth rate; SPA; Wetland Bird Survey	DENSITY-DEPENDENCE; GREAT CORMORANT; SINENSIS; EUROPE; LIVESTOCK; FIDELITY; BRITAIN; ESTUARY; PEOPLE; IMPACT	Cormorants Phalacrocorax carbo have increased on European freshwaters, creating conflicts with fishing interests. As a result, control measures have been implemented in several countries, although their effect on the English population has yet to be determined. Wetland Bird Survey data was used to derive population growth rates (PGR) of non-coastal Cormorant populations in England. PGR was analys…	[Chamberlain, D. E.] Univ Turin, Dipartimento Sci Vita & Biol Sistemi, I-10123 Turin, Italy.|[Austin, G. E.; Newson, S. E.; Johnston, A.; Burton, N. H. K.] British Trust Ornithol, Thetford IP24 2PU, Norfolk, England.	Chamberlain, DE (reprint author), Univ Turin, Dipartimento Sci Vita & Biol Sistemi, Via Accademia Albertina 13, I-10123 Turin, Italy.	dan.chamberlain99@gmail.com	Russell I, 2008, FISHERIES MANAG ECOL, V15, P189, DOI 10.1111/j.1365-2400.2008.00600.x|VANEERDEN MR, 1995, ARDEA, V83, P61|Bedard J, 1995, COLON WATERBIRD, V18, P78, DOI 10.2307/1521526|Bibby C.J., 2000, BIRD CENSUS TECHNIQU|Bregnballe T, 2011, P 7 INT C CORM|Carter SP, 2007, P R SOC B, V274, P2769, DOI 10.1098/rspb.2007.0998|Central Science Laboratory, 2005, MOD CONS NEW CORM LI|Chamberlain DE, …	45	0	1	2	29	SPRINGER	NEW YORK	233 SPRING ST, NEW YORK, NY 10013 USA	0021-8375		J ORNITHOL	J. Ornithol.	JUL	2013	154	739	750	10.1007/s10336-013-0938-3	12	Ornithology	Zoology	211SK	WOS:000323930500013		Food and Environment Research Agency (Fera); UK Department for Environment, Food and Rural Affairs (Defra)	This work was funded through the Food and Environment Research Agency (Fera) by the UK Department for Environment, Food and Rural Affairs (Defra). Our thanks go to Tim Andrews and Ashley Smith from Defra and Graham Smith from Fera for their help and comments, and to members of the fish-eating birds policy review group and to Rhys Green and Sarah Dove (RSPB) for their comments. We are also indebte…	3				Chamberlain, Dan/K-1809-2015
	J	Town, C|Marshall, A|Sethasathien, N	Town, Christopher|Marshall, Andrea|Sethasathien, Nutthaporn	Manta Matcher: automated photographic identification of manta rays using keypoint features	ECOLOGY AND EVOLUTION	English	Article	Computer-aided pattern recognition; conservation biology; marine and fisheries management; photographic identification	SHARKS RHINCODON-TYPUS; COMPUTER-AIDED IDENTIFICATION; PATTERN-RECOGNITION; PHOTOIDENTIFICATION; RECAPTURE; ECOLOGY; ROBUST; SYSTEM	For species which bear unique markings, such as natural spot patterning, field work has become increasingly more reliant on visual identification to recognize and catalog particular specimens or to monitor individuals within populations. While many species of interest exhibit characteristic markings that in principle allow individuals to be identified from photographs, scientists are often faced …	[Town, Christopher] Univ Cambridge, Comp Lab, Cambridge CB3 0FD, England.|[Marshall, Andrea] Marine Megafauna Fdn, Manta Ray & Whale Shark Res Ctr, Tofo Beach, Inhambane, Mozambique.|[Sethasathien, Nutthaporn] Univ Edinburgh, Sch Informat, Edinburgh EH8 9LE, Midlothian, Scotland.	Town, C (reprint author), Univ Cambridge, Comp Lab, 15 JJ Thomson Ave, Cambridge CB3 0FD, England.	cpt23@cam.ac.uk	Marshall AD, 2012, J FISH BIOL, V80, P1361, DOI 10.1111/j.1095-8649.2012.03244.x|Rublee E, 2011, 2011 IEEE INTERNATIONAL CONFERENCE ON COMPUTER VISION (ICCV), P2564, DOI 10.1109/ICCV.2011.6126544|Holmberg J, 2008, ECOL APPL, V18, P222, DOI 10.1890/07-0315.1|Holmberg Jason, 2009, Endangered Species Research, V7, P39, DOI 10.3354/esr00186|Bay H, 2006, LECT NOTES COMPUT SC, V3951, P404|Arzoumanian Z…	32	7	7	5	46	WILEY-BLACKWELL	HOBOKEN	111 RIVER ST, HOBOKEN 07030-5774, NJ USA	2045-7758		ECOL EVOL	Ecol. Evol.	JUL	2013	3	1902	1914	10.1002/ece3.587	13	Ecology	Environmental Sciences & Ecology	185WY	WOS:000322002400007		Research Fellowship at Wolfson College, University of Cambridge	The first author is partially supported by a Research Fellowship at Wolfson College, University of Cambridge.	7		23919138
	J	Fouad, S|Tino, P|Raychaudhury, S|Schneider, P	Fouad, Shereen|Tino, Peter|Raychaudhury, Somak|Schneider, Petra	Incorporating Privileged Information Through Metric Learning	IEEE TRANSACTIONS ON NEURAL NETWORKS AND LEARNING SYSTEMS	English	Article	Distance metric learning (DML); generalized matrix learning vector quantization (GMLVQ); information theoretic metric learning (ITML); learning using privileged information (LUPI)	DIGITAL-SKY-SURVEY; GALAXY ZOO; DATA RELEASE; CLASSIFICATION; MORPHOLOGIES	In some pattern analysis problems, there exists expert knowledge, in addition to the original data involved in the classification process. The vast majority of existing approaches simply ignore such auxiliary (privileged) knowledge. Recently a new paradigm-learning using privileged information-was introduced in the framework of SVM+. This approach is formulated for binary classification and, as t…	[Fouad, Shereen; Tino, Peter] Univ Birmingham, Sch Comp Sci, Birmingham B15 2TT, W Midlands, England.|[Raychaudhury, Somak] Univ Birmingham, Sch Phys & Astron, Birmingham B15 2TT, W Midlands, England.|[Schneider, Petra] Univ Birmingham, Sch Clin & Expt Med, Birmingham B15 2TT, W Midlands, England.	Fouad, S (reprint author), Univ Birmingham, Sch Comp Sci, Birmingham B15 2TT, W Midlands, England.	saf942@cs.bham.ac.uk; P.Tino@cs.bham.ac.uk; somak@star.sr.bham.ac.uk; p.schneider@bham.ac.uk	Abazajian KN, 2009, ASTROPHYS J SUPPL S, V182, P543, DOI 10.1088/0067-0049/182/2/543|Lintott CJ, 2008, MON NOT R ASTRON SOC, V389, P1179, DOI 10.1111/j.1365-2966.2008.13689.x|Lintott C, 2011, MON NOT R ASTRON SOC, V410, P166, DOI 10.1111/j.1365-2966.2010.17432.x|Hammer B, 2002, NEURAL NETWORKS, V15, P1059, DOI 10.1016/S0893-6080(02)00079-5|Weinberger KQ, 2009, J MACH LEARN RES, V10, P207|Tao DC, …	41	3	3	0	5	IEEE-INST ELECTRICAL ELECTRONICS ENGINEERS INC	PISCATAWAY	445 HOES LANE, PISCATAWAY, NJ 08855-4141 USA	2162-237X		IEEE T NEUR NET LEAR	IEEE Trans. Neural Netw. Learn. Syst.	JUL	2013	24	1086	1098	10.1109/TNNLS.2013.2251470	13	Computer Science, Artificial Intelligence; Computer Science, Hardware & Architecture; Computer Science, Theory & Methods; Engineering, Electrical & Electronic	Computer Science; Engineering	148XE	WOS:000319281100007		Islamic Development Bank; Biotechnology and Biological Sciences Research Council [H012508/1]	The work of S. Fouad was supported by the Islamic Development Bank. The work of P. Tino was supported by a grant from the Biotechnology and Biological Sciences Research Council under Grant H012508/1.	7		24808523
	J	Wilson, S|Anderson, EM|Wilson, ASG|Bertram, DF|Arcese, P	Wilson, Scott|Anderson, Eric M.|Wilson, Amy S. G.|Bertram, Douglas F.|Arcese, Peter	Citizen Science Reveals an Extensive Shift in the Winter Distribution of Migratory Western Grebes	PLOS ONE	English	Article		CURRENT ECOSYSTEM; BIRD POPULATIONS; PACIFIC-OCEAN; ABUNDANCE; CLIMATE; FOOD; SEA; SEABIRDS; DECLINES; RECOVERY	Marine waterbirds have shown variable trends in abundance over the past four decades with some species displaying steep declines along the Pacific coast from British Columbia through California. One of the most dramatic changes has been that of western grebes (Aechmophorus occidentalis) in the Salish Sea. This region was a former core of the species wintering distribution but they have become inc…	[Wilson, Scott] Environm Canada, Canadian Wildlife Serv, Saskatoon, SK, Canada.|[Anderson, Eric M.] Simon Fraser Univ, Ctr Wildlife Ecol, Burnaby, BC V5A 1S6, Canada.|[Wilson, Amy S. G.; Arcese, Peter] Univ British Columbia, Dept Forest Sci, Vancouver, BC V6T 1W5, Canada.|[Bertram, Douglas F.] Environm Canada, Sci & Technol Branch, Inst Ocean Sci, Sidney, BC, Canada.	Wilson, S (reprint author), Environm Canada, Canadian Wildlife Serv, Saskatoon, SK, Canada.	ScottD.Wilson@ec.gc.ca	Agler BA, 1999, WATERBIRDS, V22, P98, DOI 10.2307/1521998|Ainley DG, 2010, PROG OCEANOGR, V84, P242, DOI 10.1016/j.pocean.2009.10.001|AINLEY DG, 1995, MAR ECOL PROG SER, V118, P69, DOI 10.3354/meps118069|Alheit J, 2004, PROG OCEANOGR, V60, P201, DOI 10.1016/j.pocean.2004.02.006|Anderson Eric M., 2009, Marine Ornithology, V37, P19|Lunn DJ, 2000, STAT COMPUT, V10, P325, DOI 10.1023/A:1008929526011|…	53	12	12	15	60	PUBLIC LIBRARY SCIENCE	SAN FRANCISCO	1160 BATTERY STREET, STE 100, SAN FRANCISCO, CA 94111 USA	1932-6203		PLOS ONE	PLoS One	2015-06-19	2013	8			10.1371/journal.pone.0065408	8	Multidisciplinary Sciences	Science & Technology - Other Topics	190ST	WOS:000322361200017		Environment Canada	A portion of this work was funded by a grant and contribution by Environment Canada to PA. The funder had no role in study design, analysis, decision to publish, or preparation of the manuscript. Data collection was organized by the Audubon Society and performed by volunteers as part of the annual Audubon Christmas Bird Count.	6	e65408
	J	Gelcer, E|Fraisse, C|Dzotsi, K|Hu, ZJ|Mendes, R|Zotarelli, L	Gelcer, Eduardo|Fraisse, Clyde|Dzotsi, Kofikuma|Hu, Zhengjun|Mendes, Renan|Zotarelli, Lincoln	Effects of El Nino Southern Oscillation on the space-time variability of Agricultural Reference Index for Drought in midlatitudes	AGRICULTURAL AND FOREST METEOROLOGY	English	Article	ENSO; El Nino; ARID; Drought index; Florida; Rio Grande do Sul	CERES-MAIZE MODEL; REFERENCE EVAPOTRANSPIRATION; PENMAN-MONTEITH; PRECIPITATION; SYSTEM; ASSOCIATIONS; MANAGEMENT; YIELD	Agriculture is an economic activity directly affected by drought. With the constant increase of food demand and the need for high efficiency in food production, drought effects gain attention. The Agricultural Reference Index for Drought (ARID) was developed to quantify drought and better understand its effect on agriculture. ARID values range from 0 to 1 where zero is transpiration occurring at …	[Gelcer, Eduardo; Fraisse, Clyde; Dzotsi, Kofikuma; Hu, Zhengjun; Mendes, Renan] Univ Florida, Dept Agr & Biol Engn, Gainesville, FL 32611 USA.|[Zotarelli, Lincoln] Univ Florida, Dept Hort Sci, Gainesville, FL 32611 USA.|[Mendes, Renan] Univ Sao Paulo, Dept Comp & Digital Syst Engn, BR-05508900 Sao Paulo, Brazil.	Gelcer, E (reprint author), Univ Florida, 288 Frazier Rogers Hall POB 110570, Gainesville, FL 32611 USA.	egelcer@ufl.edu	Alderman PD, 2008, THESIS U FLORIDA GAI|Allen R. G., 1998, 56 FAO|Jones JW, 2003, EUR J AGRON, V18, P235, DOI 10.1016/S1161-0301(02)00107-7|Trenberth KE, 1997, B AM METEOROL SOC, V78, P2771, DOI 10.1175/1520-0477(1997)078<2771:TDOENO>2.0.CO;2|Woli P, 2012, AGRON J, V104, P287, DOI 10.2134/agronj2011.0286|Farooq M, 2009, AGRON SUSTAIN DEV, V29, P185, DOI 10.1051/agro:2008021|Sivakumar MVK, 2005, C…	88	2	3	7	58	ELSEVIER SCIENCE BV	AMSTERDAM	PO BOX 211, 1000 AE AMSTERDAM, NETHERLANDS	0168-1923		AGR FOREST METEOROL	Agric. For. Meteorol.	2015-06-15	2013	174	110	128	10.1016/j.agrformet.2013.02.006	19	Agronomy; Forestry; Meteorology & Atmospheric Sciences	Agriculture; Forestry; Meteorology & Atmospheric Sciences	136SE	WOS:000318382900008		Agriculture and Food Research Initiative Competitive Grant from the USDA National Institute of Food and Agriculture [2011-67003-30347]	This study is part of the "Climate variability to climate change: Extension challenges and opportunities in the Southeast USA" project and was supported by the Agriculture and Food Research Initiative Competitive Grant no. 2011-67003-30347 from the USDA National Institute of Food and Agriculture. We thank Tiago Zortea for his support on the data manipulation. We are grateful to Ana Wagner and Dr.…
	J	Toomey, AH|Domroese, MC	Toomey, Anne H.|Domroese, Margret C.	Can citizen science lead to positive conservation attitudes and behaviors?	HUMAN ECOLOGY REVIEW	English	Article	attitudes; behaviors; citizen science; conservation; public participation	ENVIRONMENTAL CONCERN; PROJECT; PARTICIPATION; BIODIVERSITY; KNOWLEDGE; EDUCATION; PROGRAMS	Citizen science the partnering of scientists with members of the public to do research is increasingly utilized in environmental research, having been credited with enabling studies that would otherwise be cost-prohibitive while promoting scientific literacy and empowering and engaging participants in conservation. Although the value of citizen-generated data for scientific purposes is increasing…	[Toomey, Anne H.] Lancaster Environm Ctr, Lancaster, England.|[Domroese, Margret C.] Amer Museum Nat Hist, Ctr Biodivers & Conservat, New York, NY 10024 USA.	Toomey, AH (reprint author), Lancaster Environm Ctr, Lancaster, England.	a.toomey@lancaster.ac.uk	Ajzen I, 1985, ACTION CONTROL COGNI, V2, P11, DOI [10.1007/978-3-642-69746-3_2, DOI 10.1007/978-3-642-69746-3_2]|Nisbet EK, 2009, ENVIRON BEHAV, V41, P715, DOI 10.1177/0013916508318748|Heimlich JE, 2008, ENVIRON EDUC RES, V14, P215, DOI 10.1080/13504620802148881|Conrad CC, 2011, ENVIRON MONIT ASSESS, V176, P273, DOI 10.1007/s10661-010-1582-5|Cooper CB, 2007, ECOL SOC, V12|Nerbonne JF, 2004, SOC N…	42	1	1	25	92	SOC HUMAN ECOLOGY	BAR HARBOR	105 EDEN ST, BAR HARBOR, ME 04609 USA	1074-4827		HUM ECOL REV	Hum. Ecol. Rev.	SUM	2013	20	50	62		13	Environmental Studies; Sociology	Environmental Sciences & Ecology; Sociology	270HB	WOS:000328308400005				1
	J	Combes, F|Moiseev, A|Reshetnikov, V	Combes, F.|Moiseev, A.|Reshetnikov, V.	Molecular content of polar-ring galaxies	ASTRONOMY & ASTROPHYSICS	English	Article	galaxies: evolution; galaxies: general; galaxies: halos; galaxies: ISM; radio lines: galaxies	NEAR-INFRARED PHOTOMETRY; NEUTRAL HYDROGEN SURVEY; TULLY-FISHER RELATION; DARK-MATTER HALO; NGC 4650A; CHEMICAL ABUNDANCES; COLD ACCRETION; DISK GALAXIES; KN-BANDS; H-BANDS	We have searched for CO lines in a sample of 21 new morphologically determined polar-ring galaxies (of which nine are kinematically confirmed), obtained from a wide search in the Galaxy Zoo project by Moiseev and collaborators. Polar-ring galaxies (PRGs) are a unique class of objects, tracing special episodes in the galaxy mass assembly: they can be formed through galaxy interaction and merging, …	[Combes, F.] LERMA, Observ Paris, CNRS UMR8112, F-75014 Paris, France.|[Moiseev, A.] Russian Acad Sci, Special Astrophys Observ, Nizhnii Arkhyz 369167, Karachaevo Cher, Russia.|[Reshetnikov, V.] St Petersburg State Univ, St Petersburg 198504, Russia.	Combes, F (reprint author), LERMA, Observ Paris, CNRS UMR8112, 61 Av Observ, F-75014 Paris, France.	francoise.combes@obspm.fr	Bell EF, 2003, ASTROPHYS J SUPPL S, V149, P289, DOI 10.1086/378847|Hinshaw G, 2009, ASTROPHYS J SUPPL S, V180, P225, DOI 10.1088/0067-0049/180/2/225|Bekki K, 1998, ASTROPHYS J, V499, P635, DOI 10.1086/305680|Bekki K, 1997, ASTROPHYS J, V490, pL37, DOI 10.1086/311008|Bettoni D., 2010, ASTRON ASTROPHYS, V519, P72|Bournaud F, 2003, ASTRON ASTROPHYS, V401, P817, DOI 10.1051/0004-6361:20030150|Brook C…	47	4	4	1	4	EDP SCIENCES S A	LES ULIS CEDEX A	17, AVE DU HOGGAR, PA COURTABOEUF, BP 112, F-91944 LES ULIS CEDEX A, FRANCE	0004-6361		ASTRON ASTROPHYS	Astron. Astrophys.	JUN	2013	554			10.1051/0004-6361/201321385	7	Astronomy & Astrophysics	Astronomy & Astrophysics	164XA	WOS:000320444200011		European Research Council [267399-Momentum]; RFBR grant [13-02-00416, 11-02-00471a]	We warmly thank the referee for constructive comments and suggestions. The IRAM staff is gratefully acknowledged for their help in the data acquisition. F.C. acknowledges the European Research Council for the Advanced Grant Program Number 267399-Momentum. A.M. is also grateful to the Dynasty Foundation and RFBR grant 13-02-00416. V. R. acknowledges partial financial support from the RFBR grant 11…		A11			Moiseev, Alexey/H-9391-2013
	J	Feichtinger, EE|Veech, JA	Feichtinger, Erin E.|Veech, Joseph A.	ASSOCIATION OF SCISSOR-TAILED FLYCATCHERS (TYRANNUS FORFICATUS) WITH SPECIFIC LAND-COVER TYPES IN SOUTH-CENTRAL TEXAS	WILSON JOURNAL OF ORNITHOLOGY	English	Article	bird habitat; National Land Cover Database; North American Breeding Bird Survey; remote sensing; Tyrannus forficatus	GRASSLAND BIRDS; ABUNDANCES	Scissor-tailed Flycatchers (Tyrannus forficatus) are insectivorous Neotropical migrants that breed in the south-central United States. We examined their fine-scale (circles 300 m in radius centered on observed flycatcher locations) associations with different land cover types in south-central Texas. Scissor-tailed Flycatchers use a sit-and-scan foraging strategy; therefore, we expected the specie…	[Feichtinger, Erin E.] Univ S Florida, Dept Integrat Biol, Tampa, FL 33620 USA.|[Veech, Joseph A.] Texas State Univ, Dept Biol, San Marcos, TX 78666 USA.	Feichtinger, EE (reprint author), Univ S Florida, Dept Integrat Biol, 4202 E Fowler Ave, Tampa, FL 33620 USA.	efeichtinger@usf.edu	BAILEY F. M., 1902, CONDOR, V4, P30, DOI 10.2307/1360946|Brambilla M, 2009, BIOL CONSERV, V142, P2033, DOI 10.1016/j.biocon.2009.03.033|Brennan SP, 2007, WILSON J ORNITHOL, V119, P631, DOI 10.1676/06-021.1|Brennan SP, 2005, ENVIRON MONIT ASSESS, V105, P209, DOI 10.1007/s10661-005-3694-x|CODY ML, 1981, BIOSCIENCE, V31, P107, DOI 10.2307/1308252|ESLEY J. D., 2001, WILSON B, V113, P290|FITCH FRANK W…	18	0	0	5	18	WILSON ORNITHOLOGICAL SOC	WACO	5400 BOSQUE BLVD, STE 680, WACO, TX 76710 USA	1559-4491		WILSON J ORNITHOL	Wilson J. Ornithol.	JUN	2013	125	314	321		8	Ornithology	Zoology	170ZG	WOS:000320893300011		Department of Biology at Texas State University	We thank our many observers that assisted in data collection. We also thank Michael Small for generating the land-cover estimates. Michael Huston and Randy Simpson provided many helpful suggestions for improving an early version of the manuscript. Gary Schnell and an anonymous reviewer helped greatly in improving the final version. Financial support for this research was provided by the Departmen…	2
	J	Stagg, BC|Donkin, M	Stagg, Bethan C.|Donkin, Maria	Teaching botanical identification to adults: experiences of the UK participatory science project "Open Air Laboratories'	JOURNAL OF BIOLOGICAL EDUCATION	English	Article	botany; botanical education; Open Air Laboratories (OPAL); plant identification; taxonomy; teaching methods	STUDENTS LEARN; CARD GAME; PLANTS; EDUCATION; PROGRAM	Taxonomic education and botany are increasingly neglected in schools and universities, leading to a missed generation' of adults that cannot identify organisms, especially plants. This study pilots three methods for teaching identification of native plant species to forty-three adults engaged in the participatory science project Open Air Laboratories' (OPAL). The three teaching methods (dichotomo…	[Stagg, Bethan C.; Donkin, Maria] Univ Plymouth, Sch Biomed & Biol Sci, Plymouth PL4 8AA, Devon, England.	Stagg, BC (reprint author), C-O B408,22 Portland Sq, Plymouth PL4 8AA, Devon, England.	bethan.stagg@plymouth.ac.uk	Sevcik RS, 2008, J CHEM EDUC, V85, P514|Morris TA, 2011, J CHEM EDUC, V88, P1397, DOI 10.1021/ed100661c|Balmford A, 2002, SCIENCE, V295, P2367|Bebbington A, 2005, J BIOL EDUC, V39, P62|Boxshall G., 2010, UK TAXONOMY SYSTEMAT|Boxshall G., 2011, DEV NATL STRATEGY TA|Carney RN, 2003, APPL COGNITIVE PSYCH, V17, P563, DOI 10.1002/acp.889|Convention on Biological Diversity, 2012, WHAT IS PROBL|Davies L…	31	3	3	7	25	ROUTLEDGE JOURNALS, TAYLOR & FRANCIS LTD	ABINGDON	4 PARK SQUARE, MILTON PARK, ABINGDON OX14 4RN, OXFORDSHIRE, ENGLAND	0021-9266		J BIOL EDUC	J. Biol. Educ.	2015-06-01	2013	47	104	110	10.1080/00219266.2013.764341	7	Biology; Education, Scientific Disciplines	Life Sciences & Biomedicine - Other Topics; Education & Educational Research	155CI	WOS:000319722600005		Big Lottery Fund	OPAL is funded by Big Lottery Fund.	2
	J	Tojeiro, R|Masters, KL|Richards, J|Percival, WJ|Bamford, SP|Maraston, C|Nichol, RC|Skibba, R|Thomas, D	Tojeiro, Rita|Masters, Karen L.|Richards, Joshua|Percival, Will J.|Bamford, Steven P.|Maraston, Claudia|Nichol, Robert C.|Skibba, Ramin|Thomas, Daniel	The different star formation histories of blue and red spiral and elliptical galaxies	MONTHLY NOTICES OF THE ROYAL ASTRONOMICAL SOCIETY	English	Article	surveys; galaxies: evolution; galaxies: statistics; galaxies: stellar content	DIGITAL-SKY-SURVEY; STELLAR POPULATION SYNTHESIS; INITIAL MASS FUNCTION; SIMILAR-TO 1; EVOLUTIONARY SEQUENCES; RADIATIVE OPACITIES; DATA RELEASE; METALLICITY HISTORIES; GALACTIC NEBULAE; HUBBLE SEQUENCE	We study the spectral properties of intermediate mass galaxies (M-* similar to 10(10.7) M-circle dot) as a function of colour and morphology. We use Galaxy Zoo to define three morphological classes of galaxies, namely early types (ellipticals), late-type (disc-dominated) face-on spirals and early-type (bulge-dominated) face-on spirals. We classify these galaxies as blue or red according to their …	[Tojeiro, Rita; Masters, Karen L.; Percival, Will J.; Maraston, Claudia; Nichol, Robert C.; Thomas, Daniel] Univ Portsmouth, Inst Cosmol & Gravitat, Portsmouth PO1 3FX, Hants, England.|[Richards, Joshua] Univ London Imperial Coll Sci Technol & Med, Dept Phys, London SW7 2AZ, England.|[Bamford, Steven P.] Univ Nottingham, Sch Phys & Astron, Nottingham NG7 2RD, England.|[Skibba, Ramin] Univ Calif S…	Tojeiro, R (reprint author), Univ Portsmouth, Inst Cosmol & Gravitat, Dennis Sciama Bldg,Burnaby Rd, Portsmouth PO1 3FX, Hants, England.	rita.tojeiro@port.ac.uk	Abazajian KN, 2009, ASTROPHYS J SUPPL S, V182, P543, DOI 10.1088/0067-0049/182/2/543|ALONGI M, 1993, ASTRON ASTROPHYS SUP, V97, P851|Bruzual G, 2003, MON NOT R ASTRON SOC, V344, P1000, DOI 10.1046/j.1365-8711.2003.06897.x|Stoughton C, 2002, ASTRON J, V123, P485, DOI 10.1086/324741|Lintott CJ, 2008, MON NOT R ASTRON SOC, V389, P1179, DOI 10.1111/j.1365-2966.2008.13689.x|Strateva I, 2001, ASTRON J,…	70	15	15	0	2	OXFORD UNIV PRESS	OXFORD	GREAT CLARENDON ST, OXFORD OX2 6DP, ENGLAND	0035-8711		MON NOT R ASTRON SOC	Mon. Not. Roy. Astron. Soc.	JUN	2013	432	359	373	10.1093/mnras/stt484	15	Astronomy & Astrophysics	Astronomy & Astrophysics	152IG	WOS:000319524600046		European Research Council; Leverhulme Trust; STFC; Alfred P. Sloan Foundation; National Science Foundation; US Department of Energy; National Aeronautics and Space Administration; Japanese Monbukagakusho; Max Planck Society; Higher Education Funding Council for England; American Museum of Natural History; Astrophysical Institute Potsdam; University of Basel; University of Cambridge; CaseWestern R…	We would like to thank the anonymous referee for useful comments that led to visible improvements to this paper. RT and WJP are thankful for support from the European Research Council. JR is thankful for a Ogden Trust summer internship. KLM acknowledges funding from The Leverhulme Trust as a 2010 Early Career Fellow. SPB gratefully acknowledges an STFC Advanced Fellowship.Funding for the SDSS and…	1			Bamford, Steven/0000-0001-7821-7195
	J	Lintott, CJ|Schwamb, ME|Barclay, T|Sharzer, C|Fischer, DA|Brewer, J|Giguere, M|Lynn, S|Parrish, M|Batalha, N|Bryson, S|Jenkins, J|Ragozzine, D|Rowe, JF|Schwainski, K|Gagliano, R|Gilardi, J|Jek, KJ|Paakkonen, JP|Smits, T	Lintott, Chris J.|Schwamb, Megan E.|Barclay, Thomas|Sharzer, Charlie|Fischer, Debra A.|Brewer, John|Giguere, Matthew|Lynn, Stuart|Parrish, Michael|Batalha, Natalie|Bryson, Steve|Jenkins, Jon|Ragozzine, Darin|Rowe, Jason F.|Schwainski, Kevin|Gagliano, Robert|Gilardi, Joe|Jek, Kian J.|Paeaekkoenen, Jari-Pekka|Smits, Tjapko	PLANET HUNTERS: NEW KEPLER PLANET CANDIDATES FROM ANALYSIS OF QUARTER 2	ASTRONOMICAL JOURNAL	English	Article	planets and satellites: detection; planets and satellites: individual (KIC 4552729b, KIC 10005758b, KIC 10005758c)	GALAXY ZOO; SYSTEMS; STELLAR	We present new planet candidates identified in NASA Kepler Quarter 2 public release data by volunteers engaged in the Planet Hunters citizen science project. The two candidates presented here survive checks for false positives, including examination of the pixel offset to constrain the possibility of a background eclipsing binary. The orbital periods of the planet candidates are 97.46 days (KIC 4…	[Lintott, Chris J.] Oxford Astrophys, Oxford OX1 3RH, England.|[Lintott, Chris J.; Lynn, Stuart; Parrish, Michael] Adler Planetarium, Chicago, IL 60605 USA.|[Schwamb, Megan E.; Schwainski, Kevin] Yale Univ, Dept Phys, New Haven, CT 06520 USA.|[Schwamb, Megan E.] Yale Univ, Yale Ctr Astron & Astrophys, New Haven, CT 06520 USA.|[Barclay, Thomas; Batalha, Natalie; Bryson, Steve; Rowe, Jason F.] NASA…	Lintott, CJ (reprint author), Oxford Astrophys, Denys Wilkinson Bldg,Keble Rd, Oxford OX1 3RH, England.	cjl@astro.ox.ac.uk	Lintott CJ, 2008, MON NOT R ASTRON SOC, V389, P1179, DOI 10.1111/j.1365-2966.2008.13689.x|Wright JT, 2011, PUBL ASTRON SOC PAC, V123, P412|Borucki WJ, 2010, SCIENCE, V327, P977, DOI 10.1126/science.1185402|Markwardt CB, 2009, ASTR SOC P, V411, P251|Batalha NM, 2010, ASTROPHYS J LETT, V713, pL103, DOI 10.1088/2041-8205/713/2/L103|Batalha NM, 2013, ASTROPHYS J SUPPL S, V204, DOI 10.1088/0067-0049/2…	26	6	6	3	9	IOP PUBLISHING LTD	BRISTOL	TEMPLE CIRCUS, TEMPLE WAY, BRISTOL BS1 6BE, ENGLAND	0004-6256		ASTRON J	Astron. J.	JUN	2013	145			10.1088/0004-6256/145/6/151	9	Astronomy & Astrophysics	Astronomy & Astrophysics	147LC	WOS:000319167400008		Yale University; NASA [10-OUTRCH.210-0001, NAS5-26555]; NSF Astronomy and Astrophysics Postdoctoral Fellowship [AST-100325]; Leverhulme Trust; National Science Foundation [DRL-0941610]; National Aeronautics and Space Administration; NASA Office of Space Science [NNX09AF08G]	D.F. acknowledges funding support from Yale University and support from the NASA Supplemental Outreach Award, 10-OUTRCH.210-0001. M.E.S. is supported by an NSF Astronomy and Astrophysics Postdoctoral Fellowship under award AST-100325. The Zooniverse is supported by The Leverhulme Trust. The Talk system used by Planet Hunters was built during work supported by the National Science Foundation under…	6	151
	J	Kyba, CCM|Wagner, JM|Kuechly, HU|Walker, CE|Elvidge, CD|Falchi, F|Ruhtz, T|Fischer, J|Holker, F	Kyba, Christopher C. M.|Wagner, Janna M.|Kuechly, Helga U.|Walker, Constance E.|Elvidge, Christopher D.|Falchi, Fabio|Ruhtz, Thomas|Fischer, Juergen|Hoelker, Franz	Citizen Science Provides Valuable Data for Monitoring Global Night Sky Luminance	SCIENTIFIC REPORTS	English	Article		LIGHT-POLLUTION; BRIGHTNESS; PROPAGATION; RADIANCES; WORLD	The skyglow produced by artificial lights at night is one of the most dramatic anthropogenic modifications of Earth's biosphere. The GLOBE at Night citizen science project allows individual observers to quantify skyglow using star maps showing different levels of light pollution. We show that aggregated GLOBE at Night data depend strongly on artificial skyglow, and could be used to track lighting…	[Kyba, Christopher C. M.; Ruhtz, Thomas; Fischer, Juergen] Free Univ Berlin, Inst Space Sci, Berlin, Germany.|[Kyba, Christopher C. M.; Wagner, Janna M.; Kuechly, Helga U.; Hoelker, Franz] Leibniz Inst Freshwater Ecol & Inland Fisheries, Berlin, Germany.|[Walker, Constance E.] Natl Opt Astron Observ, Tucson, AZ 85726 USA.|[Elvidge, Christopher D.] NOAA, Boulder, CO USA.|[Falchi, Fabio] Light Poll…	Kyba, CCM (reprint author), Free Univ Berlin, Inst Space Sci, Berlin, Germany.	christopher.kyba@wew.fu-berlin.de	Navara KJ, 2007, J PINEAL RES, V43, P215, DOI 10.1111/j.1600-079X.2007.00473.x|Lintott CJ, 2008, MON NOT R ASTRON SOC, V389, P1179, DOI 10.1111/j.1365-2966.2008.13689.x|Cinzano P, 2001, MON NOT R ASTRON SOC, V328, P689, DOI 10.1046/j.1365-8711.2001.04882.x|Cohn JP, 2008, BIOSCIENCE, V58, P192, DOI 10.1641/B580303|Anderson DP, 2002, COMMUN ACM, V45, P56, DOI 10.1145/581571.581573|Silvertown J, 200…	40	11	12	10	34	NATURE PUBLISHING GROUP	LONDON	MACMILLAN BUILDING, 4 CRINAN ST, LONDON N1 9XW, ENGLAND	2045-2322		SCI REP-UK	Sci Rep	MAY 16	2013	3			10.1038/srep01835	6	Multidisciplinary Sciences	Science & Technology - Other Topics	144TZ	WOS:000318964600001		Verlust der Nacht project; Federal Ministry of Education and Research, Germany [BMBF-033L038A]; project (IFV) Lichtimmissionen im offentlichen Raum; Berlin Senate Department for Economics, Technology and Research, Germany	We thank Ania Wisniewska for her visit to Berlin under the Erasmus student exchange program, during which the idea for this manuscript was conceived. We also thank Paul Marchant for reviewing an early version of the manuscript. This work was supported by the Verlust der Nacht project (funded by the Federal Ministry of Education and Research, Germany, BMBF-033L038A) and the project (IFV) Lichtimmi…		1835	23677222		Holker, Franz/A-5683-2009; Elvidge, Christopher/C-3012-2009
	J	Schwamb, ME|Orosz, JA|Carter, JA|Welsh, WF|Fischer, DA|Torres, G|Howard, AW|Crepp, JR|Keel, WC|Lintott, CJ|Kaib, NA|Terrell, D|Gagliano, R|Jek, KJ|Parrish, M|Smith, AM|Lynn, S|Simpson, RJ|Giguere, MJ|Schawinski, K	Schwamb, Megan E.|Orosz, Jerome A.|Carter, Joshua A.|Welsh, William F.|Fischer, Debra A.|Torres, Guillermo|Howard, Andrew W.|Crepp, Justin R.|Keel, William C.|Lintott, Chris J.|Kaib, Nathan A.|Terrell, Dirk|Gagliano, Robert|Jek, Kian J.|Parrish, Michael|Smith, Arfon M.|Lynn, Stuart|Simpson, Robert J.|Giguere, Matthew J.|Schawinski, Kevin	PLANET HUNTERS: A TRANSITING CIRCUMBINARY PLANET IN A QUADRUPLE STAR SYSTEM	ASTROPHYSICAL JOURNAL	English	Article	binaries: eclipsing; planets and satellites: detection; planets and satellites: general; stars: individual (KIC 4862625)	WIDE BINARY STARS; ECLIPSING BINARY; CM DRACONIS; ABSOLUTE DIMENSIONS; EVOLUTIONARY MODELS; ACCURATE MASSES; STELLAR ORBITS; MAIN-SEQUENCE; DATA RELEASE; HW VIRGINIS	We report the discovery and confirmation of a transiting circumbinary planet (PH1b) around KIC 4862625, an eclipsing binary in the Kepler field. The planet was discovered by volunteers searching the first six Quarters of publicly available Kepler data as part of the Planet Hunters citizen science project. Transits of the planet across the larger and brighter of the eclipsing stars are detectable …	[Schwamb, Megan E.; Schawinski, Kevin] Yale Univ, Yale Ctr Astron & Astrophys, New Haven, CT 06520 USA.|[Schwamb, Megan E.; Schawinski, Kevin] Yale Univ, Dept Phys, New Haven, CT 06511 USA.|[Orosz, Jerome A.; Welsh, William F.] San Diego State Univ, Dept Astron, San Diego, CA 92182 USA.|[Carter, Joshua A.; Torres, Guillermo] Harvard Smithsonian Ctr Astrophys, Cambridge, MA 02138 USA.|[Fischer, De…	Schwamb, ME (reprint author), Yale Univ, Yale Ctr Astron & Astrophys, POB 208121, New Haven, CT 06520 USA.	megan.schwamb@yale.edu	Adams ER, 2012, ASTRON J, V144, DOI 10.1088/0004-6256/144/2/42|Alexander R, 2012, ASTROPHYS J LETT, V757, DOI 10.1088/2041-8205/757/2/L29|ANDERSEN J, 1991, ASTRON ASTROPHYS REV, V3, P91, DOI 10.1007/BF00873538|Lintott CJ, 2008, MON NOT R ASTRON SOC, V389, P1179, DOI 10.1111/j.1365-2966.2008.13689.x|Welsh WF, 2012, NATURE, V481, P475, DOI 10.1038/nature10768|Dotter A, 2008, ASTROPHYS J SUPPL S, V1…	75	48	48	2	9	IOP PUBLISHING LTD	BRISTOL	TEMPLE CIRCUS, TEMPLE WAY, BRISTOL BS1 6BE, ENGLAND	0004-637X		ASTROPHYS J	Astrophys. J.	MAY 10	2013	768			10.1088/0004-637X/768/2/127	21	Astronomy & Astrophysics	Astronomy & Astrophysics	134QK	WOS:000318228400030		National Science Foundation (NSF) Astronomy and Astrophysics Postdoctoral Fellowship [AST-1003258]; American Philosophical Society; Kepler Participating Scientist Program via NASA [NNX12AD23G]; NSF [AST-1109928, AST-1007992]; NASA [10-OUTRCH.210-0001, NAS8-03060, NAS5-26555]; STScI; Yale University; Leverhulme Trust; NASA Einstein Postdoctoral Fellowship, the Chandra X-ray Observatory Center [PF9…	M.E.S. is supported by a National Science Foundation (NSF) Astronomy and Astrophysics Postdoctoral Fellowship under award AST-1003258 and in part by an American Philosophical Society Franklin Grant. J.A.O. and W.F.W. acknowledge support from the Kepler Participating Scientist Program via NASA grant NNX12AD23G and the NSF via grant AST-1109928. J.A.C. acknowledges NASA support through Hubble Fello…	2	127		Howard, Andrew/0000-0001-8638-0320	Howard, Andrew/D-4148-2015
	J	Cameron, RAD	Cameron, Robert A. D.	The poor relation? Polymorphism in Cepaea hortensis (O. F. Muller) and the Evolution Megalab	JOURNAL OF MOLLUSCAN STUDIES	English	Article		HABITAT STABILITY; NEMORALIS; POPULATIONS; SELECTION; FREQUENCIES; PATTERNS; SNAILS	The shell-colour and banding polymorphism of Cepaea hortensis has attracted less attention than that of its congener C. nemoralis. While the Evolution Megalab acquired many records of its variation, those submitted by amateurs were unreliable, and hence it was impossible to analyse possible changes over time. Nevertheless, the Megalab database reveals many aspects of variation in C. hortensis. Th…	[Cameron, Robert A. D.] Univ Sheffield, Dept Anim & Plant Sci, Sheffield S10 4TN, S Yorkshire, England.|[Cameron, Robert A. D.] Nat Hist Museum, Dept Zool, London SW7 5BD, England.	Cameron, RAD (reprint author), Univ Sheffield, Dept Anim & Plant Sci, Sheffield S10 4TN, S Yorkshire, England.	r.cameron@sheffield.ac.uk	CLARKE B, 1962, HEREDITY, V17, P319, DOI 10.1038/hdy.1962.35|BANTOCK CR, 1973, ZOOL J LINN SOC-LOND, V53, P237, DOI 10.1111/j.1096-3642.1973.tb00788.x|Cain A. J., 1992, GENES ECOLOGY, P3|CAIN A J, 1969, Proceedings of the Malacological Society of London, V38, P269|Cain A. J., 1963, Journal of the Linnean Society Zoology, V45, P1|CAIN AJ, 1983, BIOLOGIST, V30, P193|CAMERON R. A. D., BIOL J LINN SO…	34	0	0	2	15	OXFORD UNIV PRESS	OXFORD	GREAT CLARENDON ST, OXFORD OX2 6DP, ENGLAND	0260-1230		J MOLLUS STUD	J. Molluscan Stud.	MAY	2013	79	112	117	10.1093/mollus/eyt001	6	Marine & Freshwater Biology; Zoology	Marine & Freshwater Biology; Zoology	139GH	WOS:000318569500002		Royal Society; British Council	This paper uses data obtained in the Evolution Megalab project, led by Jonathan Silvertown, and supported by grants from the Royal Society and the British Council. I thank all members of the Megalab team, and all contributors of records. Laurence Cook and Malgorzata Ozgo made valuable comments on the draft.
	J	Laughlin, AJ|Taylor, CM|Bradley, DW|LeClair, D|Clark, RG|Dawson, RD|Dunn, PO|Horn, A|Leonard, M|Sheldon, DR|Shutler, D|Whittingham, LA|Winkler, DW|Norris, DR	Laughlin, Andrew J.|Taylor, Caz M.|Bradley, David W.|LeClair, Dayna|Clark, Robert G.|Dawson, Russell D.|Dunn, Peter O.|Horn, Andrew|Leonard, Marty|Sheldon, Daniel R.|Shutler, Dave|Whittingham, Linda A.|Winkler, David W.|Norris, D. Ryan	INTEGRATING INFORMATION FROM GEOLOCATORS, WEATHER RADAR, AND CITIZEN SCIENCE TO UNCOVER A KEY STOPOVER AREA OF AN AERIAL INSECTIVORE	AUK	English	Article	annual cycle; habitat use; migration; stopover sites; Tachycineta bicolor; Tree Swallow	POPULATION-DYNAMICS; MIGRATORY BIRDS; TRACKING; MIGRANTS; AEROECOLOGY; MOVEMENTS; PATTERNS; SONGBIRD; COAST	Determining the distribution of stopover and overwintering areas of migratory animals is essential for understanding population dynamics and building predictive models. Tree Swallows (Tachycineta bicolor) are small songbirds that breed across North America. Data from Doppler weather radar and eBird indicate that Tree Swallow numbers increase throughout October and November in southeastern Louisia…	[Laughlin, Andrew J.; Taylor, Caz M.] Tulane Univ, Dept Ecol & Evolutionary Biol, New Orleans, LA 70118 USA.|[Bradley, David W.; LeClair, Dayna; Norris, D. Ryan] Univ Guelph, Dept Integrat Biol, Guelph, ON N1G 2W1, Canada.|[Bradley, David W.] Bird Studies Canada, Port Rowan, ON N0E 1M0, Canada.|[Clark, Robert G.] Environm Canada, Saskatoon, SK S7N 0X4, Canada.|[Dawson, Russell D.] Univ No British…	Laughlin, AJ (reprint author), Tulane Univ, Dept Ecol & Evolutionary Biol, New Orleans, LA 70118 USA.	alaughli@tulane.edu	ABLE KP, 1972, WILSON BULL, V84, P231|Stutchbury BJM, 2009, SCIENCE, V323, P896, DOI 10.1126/science.1166664|Fudickar AM, 2012, METHODS ECOL EVOL, V3, P47, DOI 10.1111/j.2041-210X.2011.00136.x|Norris DR, 2007, CONDOR, V109, P535|Faaborg J, 2010, ECOL APPL, V20, P398, DOI 10.1890/09-0397.1|Bairlein F, 2012, BIOL LETTERS, V8, P505, DOI 10.1098/rsbl.2011.1223|Audubon J. J., 1929, J JJ AUDUBON MADE H…	40	8	8	9	46	AMER ORNITHOLOGISTS UNION	LAWRENCE	ORNITHOLOGICAL SOC NORTH AMER PO BOX 1897, LAWRENCE, KS 66044-8897 USA	0004-8038		AUK	AUK	APR	2013	130	230	239	10.1525/auk.2013.12229	10	Ornithology	Zoology	157KV	WOS:000319895900003		Canadian Foundation for Innovation; Natural Sciences and Engineering Research Council of Canada; Bird Studies Canada; Ontario Ministry of Natural Resources; Newcomb College Institute at Tulane University; National Science Foundation [DBI-0905885, IIS-1125228]; Environment Canada	We thank M. T. Murphy, K. Fraser, and E. McKinnon for inviting us to contribute to this special issue of The Auk. Thank you too all citizen scientists who report their reports to eBird, and to B. Sullivan for his help with eBird retrieval. Funding for this research was provided by the Canadian Foundation for Innovation (to D.R.N.), the Natural Sciences and Engineering Research Council of Canada (…	2			Dunn, Peter/0000-0002-7450-4194	Taylor, Caz/A-3602-2013; Dunn, Peter/A-9784-2008
	J	Simmons, BD|Lintott, C|Schawinski, K|Moran, EC|Han, AN|Kaviraj, S|Masters, KL|Urry, CM|Willett, KW|Bamford, SP|Nichol, RC	Simmons, Brooke D.|Lintott, Chris|Schawinski, Kevin|Moran, Edward C.|Han, Anna|Kaviraj, Sugata|Masters, Karen L.|Urry, C. Megan|Willett, Kyle W.|Bamford, Steven P.|Nichol, Robert C.	Galaxy Zoo: bulgeless galaxies with growing black holes	MONTHLY NOTICES OF THE ROYAL ASTRONOMICAL SOCIETY	English	Article	galaxies: active; galaxies: bulges; galaxies: evolution; galaxies: general; galaxies: Seyfert; galaxies: spiral	ACTIVE GALACTIC NUCLEI; DIGITAL-SKY-SURVEY; DARK-MATTER HALOES; SEYFERT 1 GALAXIES; HOST GALAXIES; DISK GALAXIES; LOW-MASS; ELLIPTIC GALAXIES; STAR-FORMATION; LUMINOSITY FUNCTION	The growth of supermassive black holes appears to be driven by galaxy mergers, violent merger-free processes and/or 'secular' processes. In order to quantify the effects of secular evolution on black hole growth, we study a sample of active galactic nuclei (AGN) in galaxies with a calm formation history free of significant mergers, a population that heretofore has been difficult to locate. Here w…	[Simmons, Brooke D.; Lintott, Chris; Kaviraj, Sugata] Oxford Astrophys, Oxford OX1 3RH, England.|[Simmons, Brooke D.; Schawinski, Kevin; Han, Anna; Urry, C. Megan] Yale Univ, Yale Ctr Astron & Astrophys, New Haven, CT 06520 USA.|[Simmons, Brooke D.; Urry, C. Megan] Yale Univ, Dept Astron, New Haven, CT 06511 USA.|[Lintott, Chris] Adler Planetarium, Chicago, IL 60605 USA.|[Schawinski, Kevin; Han, …	Simmons, BD (reprint author), Oxford Astrophys, Denys Wilkinson Bldg,Keble Rd, Oxford OX1 3RH, England.	brooke.simmons@astro.ox.ac.uk	Kauffmann G, 2003, MON NOT R ASTRON SOC, V346, P1055, DOI 10.1111/j.1365-2966.2003.07154.x|Hopkins PF, 2008, ASTROPHYS J SUPPL S, V175, P356, DOI 10.1086/524362|SANDERS DB, 1988, ASTROPHYS J, V325, P74, DOI 10.1086/165983|Bell EF, 2001, ASTROPHYS J, V550, P212, DOI 10.1086/319728|Lintott CJ, 2008, MON NOT R ASTRON SOC, V389, P1179, DOI 10.1111/j.1365-2966.2008.13689.x|Volonteri M, 2008, MON NOT R…	120	19	19	2	3	OXFORD UNIV PRESS	OXFORD	GREAT CLARENDON ST, OXFORD OX2 6DP, ENGLAND	0035-8711		MON NOT R ASTRON SOC	Mon. Not. Roy. Astron. Soc.	MAR	2013	429	2199	2211	10.1093/mnras/sts491	13	Astronomy & Astrophysics	Astronomy & Astrophysics	135ET	WOS:000318271300025		Worcester College, Oxford; NASA [HST-AR-12638.01-A, NAS8-03060]; NASA by Chandra X-ray Observatory Center [PF9-00069]; National Science Foundation [AST-0909063]; 1851 Royal Commission, Imperial College London, Worcester College, Oxford; BIPAC institute at Oxford; Leverhulme Trust; STFC [ST/I001204/1]; Alfred P. Sloan Foundation; U.S. Department of Energy; National Aeronautics and Space Administra…	We wish to thank to C. Peng for making GALFIT publicly available, and for many enlightening discussions. We also wish to thank R. Skibba, M. Williams and the anonymous referee for thorough and constructive comments that helped us improve this manuscript. The Java Script Cosmology Calculator (Wright 2006) and TOPCAT (Taylor 2005) were used while preparing this paper. BDS acknowledges support from …	3			Urry, Claudia/0000-0002-0745-9792; Masters, Karen/0000-0003-0846-9578; Bamford, Steven/0000-0001-7821-7195	Urry, Claudia/G-7381-2011;
	J	Dail, D|Madsen, L	Dail, D.|Madsen, L.	Estimating Open Population Site Occupancy from Presence-Absence Data Lacking the Robust Design	BIOMETRICS	English	Article	Animal monitoring; Detection probability; N-mixture models; North American Breeding Bird Survey; Robust design; Site occupancy	MODELS; LIKELIHOOD; ABUNDANCE; COUNTS	Many animal monitoring studies seek to estimate the proportion of a study area occupied by a target population. The study area is divided into spatially distinct sites where the detected presence or absence of the population is recorded, and this is repeated in time for multiple seasons. However, when occupied sites are detected with probability p < 1, the lack of a detection does not imply lack …	[Dail, D.; Madsen, L.] Oregon State Univ, Dept Stat, Corvallis, OR 97331 USA.	Dail, D (reprint author), Oregon State Univ, Dept Stat, Corvallis, OR 97331 USA.	daild@lifetime.oregonstate.edu; madsenl@onid.orst.edu	SELF SG, 1987, J AM STAT ASSOC, V82, P605, DOI 10.2307/2289471|MacKenzie DI, 2003, ECOLOGY, V84, P2200, DOI 10.1890/02-3090|Buckland ST, 2001, INTRO DISTANCE SAMPL|BURNHAM K. P., 2002, MODEL SELECTION INFE|Dail D, 2011, BIOMETRICS, V67, P577, DOI 10.1111/j.1541-0420.2010.01465.x|Dixon P. M., 2002, ENCY ENV, V1, P212|Guillera-Arroita G, 2011, METHODS ECOL EVOL, V2, P401, DOI 10.1111/j.2041-210X.20…	28	2	2	5	29	WILEY-BLACKWELL	HOBOKEN	111 RIVER ST, HOBOKEN 07030-5774, NJ USA	0006-341X		BIOMETRICS	Biometrics	MAR	2013	69	146	156	10.1111/j.1541-0420.2012.01796.x	11	Biology; Mathematical & Computational Biology; Statistics & Probability	Life Sciences & Biomedicine - Other Topics; Mathematical & Computational Biology; Mathematics	122FM	WOS:000317303500016				1		23006066
	J	Parslow, GR	Parslow, Graham R.	Commentary: Crowdsourcing, foldit, and scientific discovery games	BIOCHEMISTRY AND MOLECULAR BIOLOGY EDUCATION	English	Editorial Material	crowdsourcing; Foldit; cooperative learning			Univ Melbourne, Dept Biochem & Mol Biol, Melbourne, Vic 3010, Australia.	Parslow, GR (reprint author), Univ Melbourne, Dept Biochem & Mol Biol, Melbourne, Vic 3010, Australia.	gparslow@unimelb.edu.au	Cooper Seth, 2010, CHALLENGE DESIGNING|Creamer M., 2009, CROWDSOURCING DONE W|Dartnell L., 2008, NEW SCI, V2681, P56|Farley PC, 2013, BIOCHEM MOL BIOL EDU, V41, P56, DOI 10.1002/bmb.20655|Khatib F, 2011, NAT STRUCT MOL BIOL, V18, P1175, DOI 10.1038/nsmb.2119	5	2	2	2	22	WILEY-BLACKWELL	HOBOKEN	111 RIVER ST, HOBOKEN 07030-5774, NJ USA	1470-8175		BIOCHEM MOL BIOL EDU	Biochem. Mol. Biol. Educ.	MAR-APR	2013	41	116	117	10.1002/bmb.20686	2	Biochemistry & Molecular Biology; Education, Scientific Disciplines	Biochemistry & Molecular Biology; Education & Educational Research	113UL	WOS:000316694400010				2		23483655
	J	Bahn, V|McGill, BJ	Bahn, Volker|McGill, Brian J.	Testing the predictive performance of distribution models	OIKOS	English	Article		SPECIES DISTRIBUTION MODELS; CLIMATE-CHANGE; SPATIAL AUTOCORRELATION; GEOGRAPHIC DISTRIBUTIONS; HABITAT SUITABILITY; ECOLOGICAL THEORY; RANDOM FORESTS; NICHE; CONSERVATION; GENERALITY	Distribution models are used to predict the likelihood of occurrence or abundance of a species at locations where census data are not available. An integral part of modelling is the testing of model performance. We compared different schemes and measures for testing model performance using 79 species from the North American Breeding Bird Survey. The four testing schemes we compared featured incre…	[Bahn, Volker] Wright State Univ, Dept Biol Sci, Dayton, OH 45435 USA.|[McGill, Brian J.] Univ Maine, Sch Biol & Ecol, Orono, ME 04469 USA.|[McGill, Brian J.] Univ Maine, Sustainabil Solut Initiat, Orono, ME 04469 USA.	Bahn, V (reprint author), Wright State Univ, Dept Biol Sci, 3640 Colonel Glenn Highway, Dayton, OH 45435 USA.	volker.bahn@wright.edu	Andrewartha HG, 1984, ECOLOGICAL WEB MORE|Engler R, 2004, J APPL ECOL, V41, P263, DOI 10.1111/j.0021-8901.2004.00881.x|Iverson LR, 1998, ECOL MONOGR, V68, P465, DOI 10.2307/2657150|LEGENDRE P, 1993, ECOLOGY, V74, P1659, DOI 10.2307/1939924|Peterson AT, 2003, Q REV BIOL, V78, P419, DOI 10.1086/378926|Araujo MB, 2012, ECOLOGY, V93, P1527, DOI 10.1890/11-1930.1|Lennon JJ, 2000, ECOGRAPHY, V23, P101,…	76	22	22	12	131	WILEY-BLACKWELL	HOBOKEN	111 RIVER ST, HOBOKEN 07030-5774, NJ USA	0030-1299		OIKOS	Oikos	MAR	2013	122	321	331	10.1111/j.1600-0706.2012.00299.x	11	Ecology	Environmental Sciences & Ecology	097IR	WOS:000315467700001		NSERC	We are indebted to thousands of volunteers and their coordinators for making the North American Breeding Bird Survey data publicly available. Funding was provided by NSERC. We thank Deanna Newsom for assistance.	3				McGill, Brian/A-3476-2008
[truncated: 476 more rows]
[truncated: 11 more columns]

## Sheet: Bibliography
Aagaard, K., & Lockwood, J. (2014). Exotic birds show lags in population growth. Diversity and Distributions, 20(5), 547–554. http://doi.org/10.1111/ddi.12175
Abramic, A., Gonzalez del Rio, J., Martinez-Alzamora, N., & Ferrer, J. (2012). Evaluation of the possibility for phytoplankton monitoring frequency reduction in the coastal waters of the Community of Valencia, in the scope of the Water Framework Directive. Marine Pollution Bulletin, 64(8), 1637–1647. http://doi.org/10.1016/j.marpolbul.2012.05.026
Adolf-Bryfogle, J., & Dunbrack, R. L. (2013). The PyRosetta Toolkit: A Graphical User Interface for the Rosetta Software Suite. Plos One, 8(7), e66856. http://doi.org/10.1371/journal.pone.0066856
Aebischer, N. J. (1999). Multi-way comparisons and generalized linear models of nest success: extensions of the Mayfield method. Bird Study, 46, 22–31.
Alario, M. (1998). Ecosystem restoration and environmental controversies: Between science and politics. (W. Wright & S. Kaplan, Eds.). Pueblo: Soc Interdisciplinary Study Social Imagery.
Albright, T. P., Pidgeon, A. M., Rittenhouse, C. D., Clayton, M. K., Flather, C. H., Culbert, P. D., … Radeloff, V. C. (2010). Effects of drought on avian community structure. Global Change Biology, 16(8), 2158–2170. http://doi.org/10.1111/j.1365-2486.2009.02120.x
[truncated: 627 more rows]

## Sheet: Search String
(TS="Agent Exoplanet"
OR TS="Astrosphere New Media Association"
OR TS="Astronomers without borders"
OR TS="Audubon Christmas Bird Count"
[truncated: 553 more rows]

## Sheet: Extraction Script
#Use with Python 3 or greater
import re
[truncated: 21 more rows]
